# Supplementary material for: Probing Antibacterial and Anticancer Potential of Selenicereus undatus, Pistacia vera L. and Olea europaea L. against Uropathogens, MCF-7 and A2780 Cancer Cells
Source: MDPI journal article supplement (doi:10.3390/molecules28248148), 2023-12-18
Supplement: s1 [file s1]

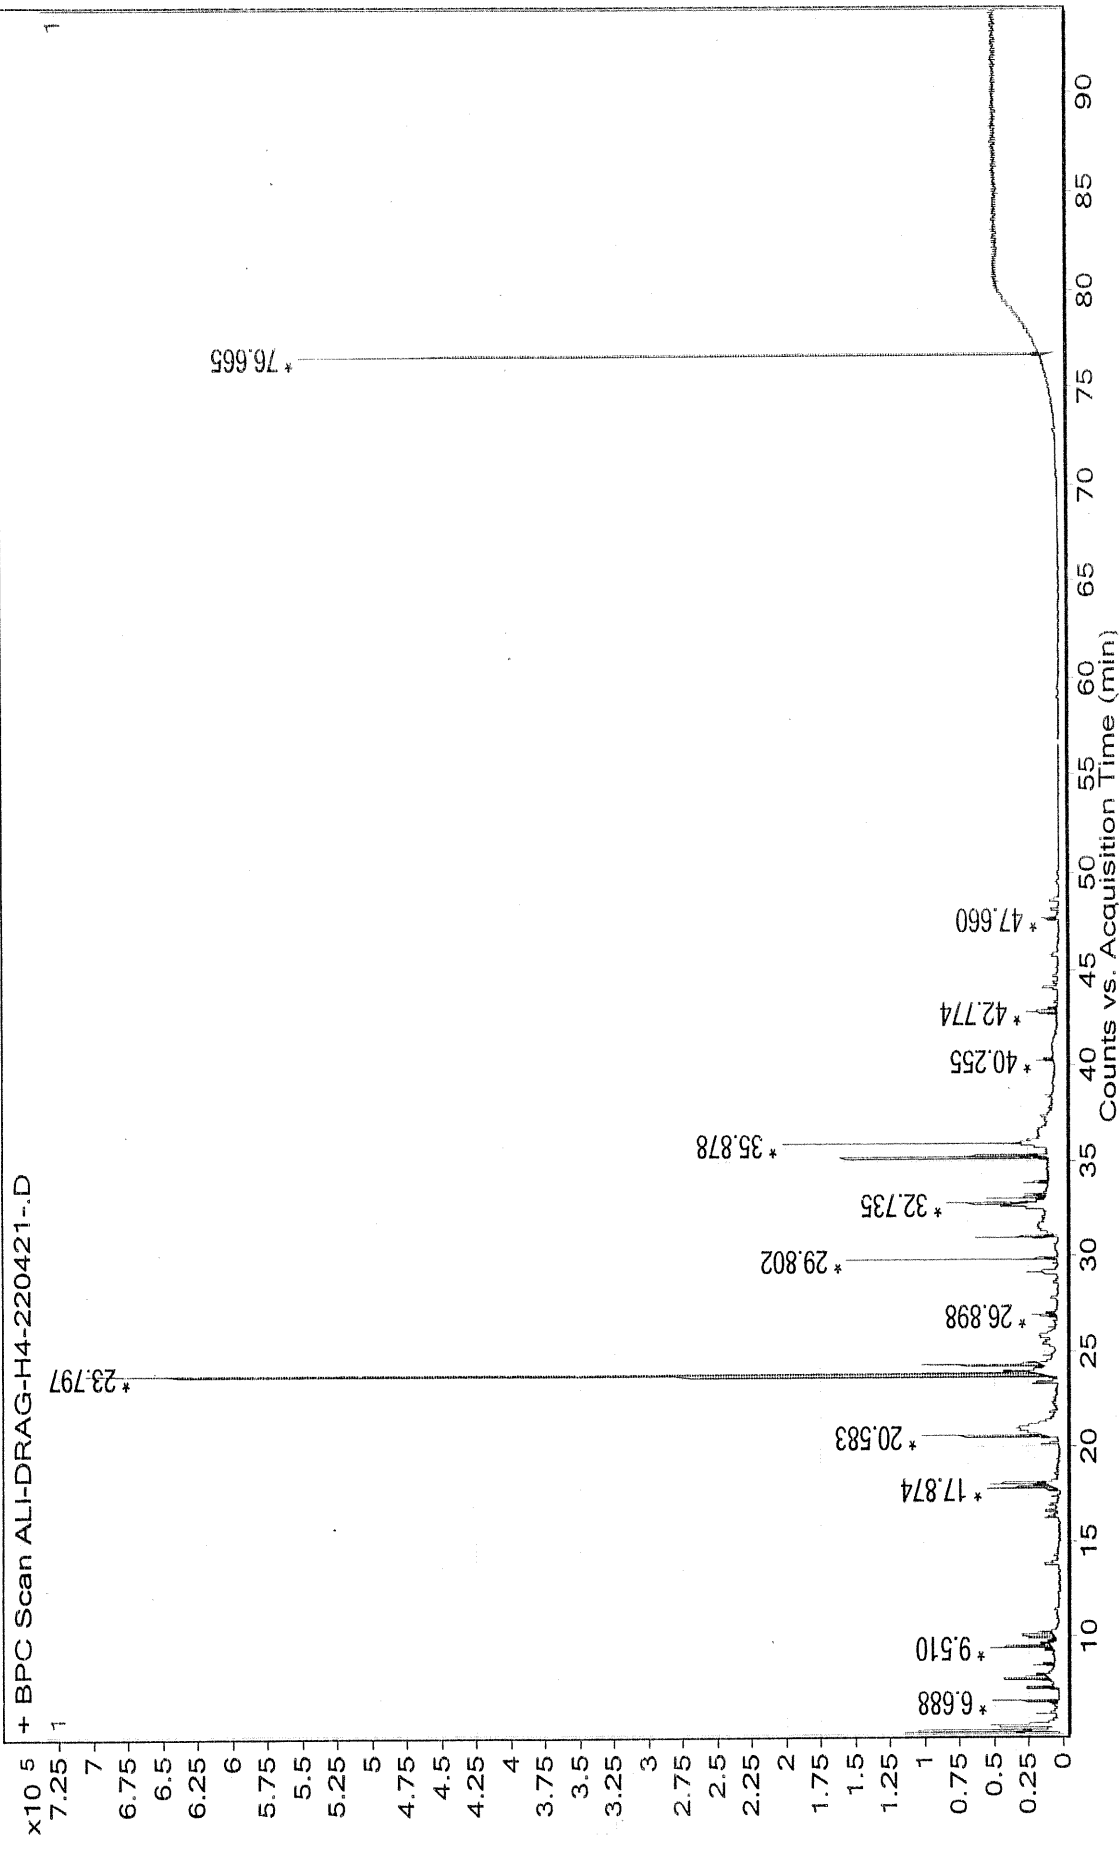

$\pi$ 

PMI

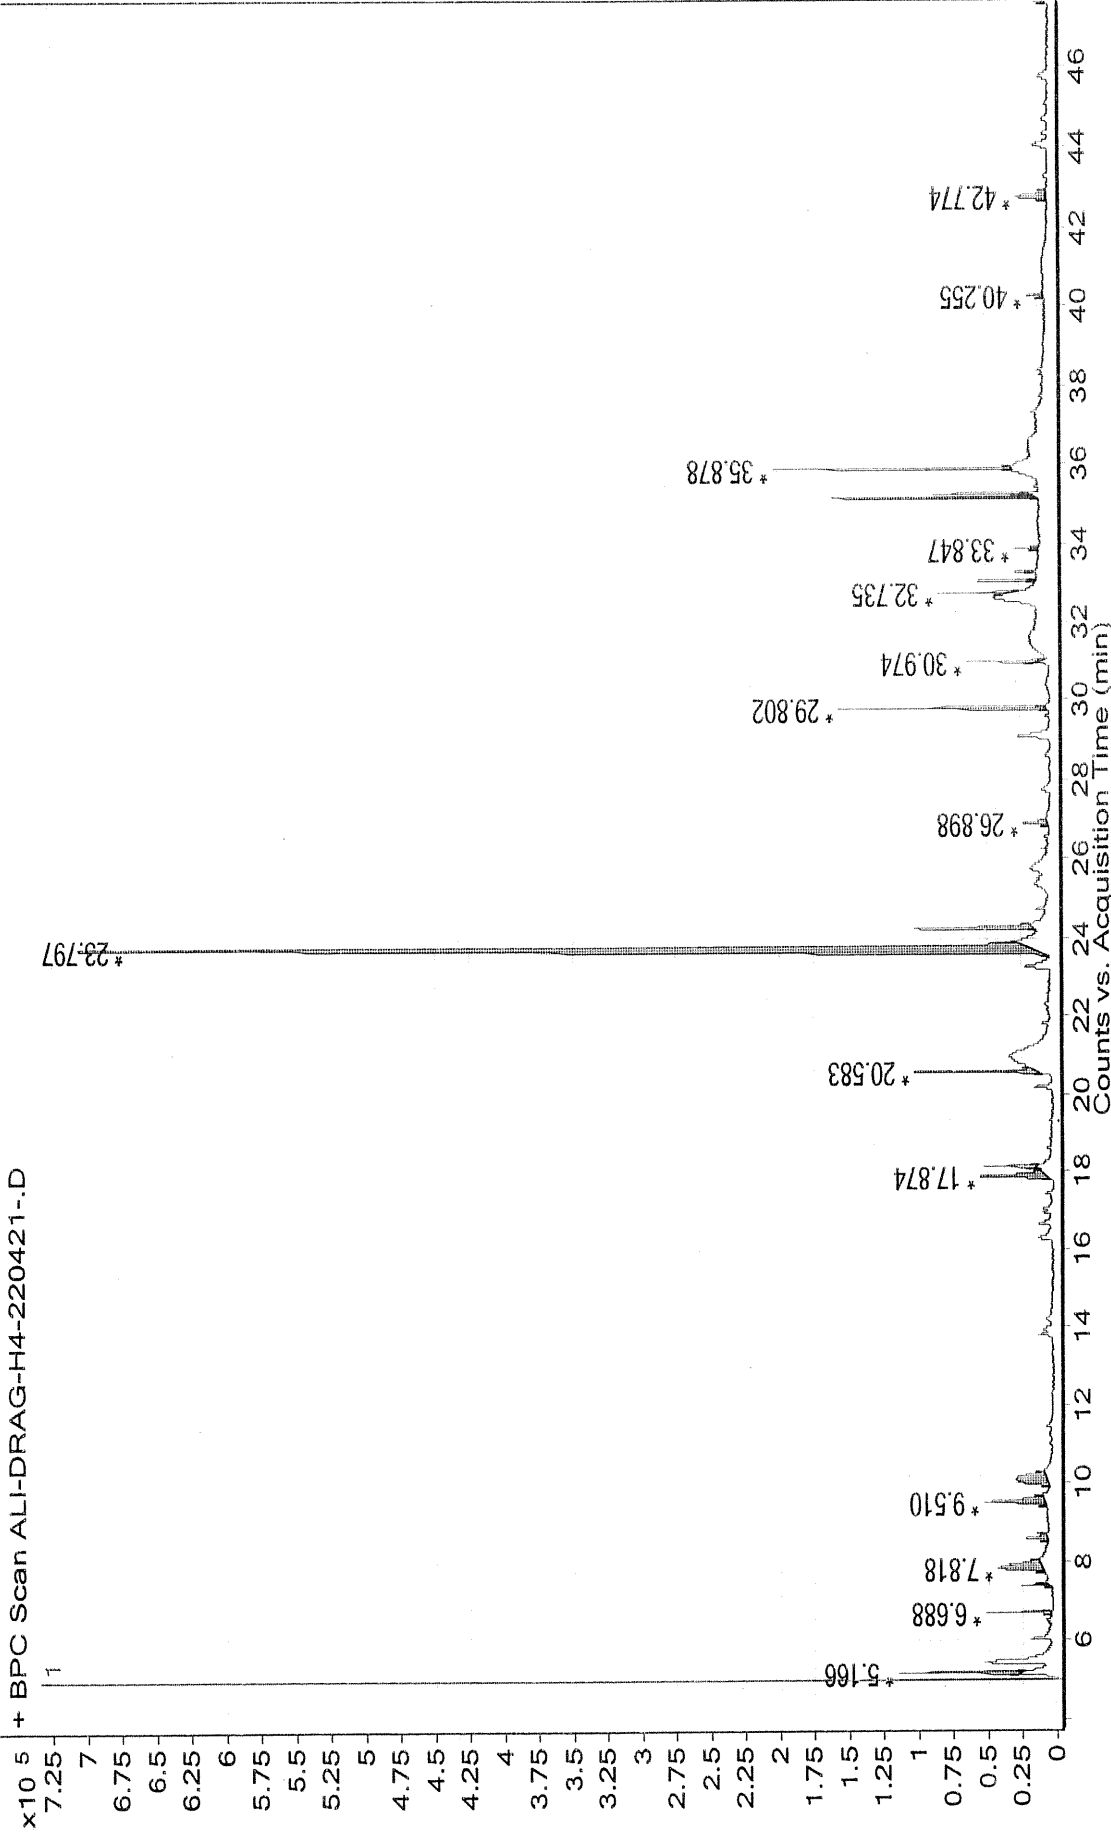

it

PM

## DRAG-H4

| Peak Number | RT     | Area    | Area % | Height | Width | Area Sum % | Height % |
|-------------|--------|---------|--------|--------|-------|------------|----------|
| 1           | 5.166  | 344433  | 6.14   | 88468  | 0.114 | 2.79       | 12.92    |
| 2           | 6.688  | 120192  | 2.14   | 47537  | 0.093 | 0.97       | 6.94     |
| 3           | 7.358  | 61537   | 1.1    | 21254  | 0.107 | 0.5        | 3.1      |
| 4           | 7.818  | 349576  | 6.23   | 32601  | 0.342 | 2.84       | 4.76     |
| 5           | 8.573  | 64761   | 1.15   | 15362  | 0.185 | 0.53       | 2.24     |
| 6           | 9.51   | 277201  | 4.94   | 44447  | 0.289 | 2.25       | 6.49     |
| 7           | 10.141 | 353820  | 6.3    | 22793  | 0.431 | 2.87       | 3.33     |
| 8           | 17.874 | 298238  | 5.31   | 48641  | 0.289 | 2.42       | 7.1      |
| 9           | 18.131 | 130153  | 2.32   | 38467  | 0.114 | 1.06       | 5.62     |
| 10          | 20.583 | 348128  | 6.2    | 88488  | 0.153 | 2.82       | 12.92    |
| 11          | 23.797 | 5613910 | 100    | 684743 | 0.328 | 45.53      | 100      |
| 12          | 24.26  | 436526  | 7.78   | 85555  | 0.189 | 3.54       | 12.49    |
| 13          | 26.898 | 81016   | 1.44   | 17437  | 0.164 | 0.66       | 2.55     |
| 14          | 29.802 | 510977  | 9.1    | 149294 | 0.132 | 4.14       | 21.8     |
| 15          | 30.974 | 137729  | 2.45   | 51779  | 0.093 | 1.12       | 7.56     |
| 16          | 32.735 | 110781  | 1.97   | 50676  | 0.078 | 0.9        | 7.4      |
| 17          | 33.041 | 108475  | 1.93   | 41739  | 0.086 | 0.88       | 6.1      |
| 18          | 33.266 | 21541   | 0.38   | 13077  | 0.05  | 0.17       | 1.91     |
| 19          | 33.847 | 39519   | 0.7    | 17163  | 0.075 | 0.32       | 2.51     |
| 20          | 35.133 | 453364  | 8.08   | 147822 | 0.11  | 3.68       | 21.59    |
| 21          | 35.229 | 165399  | 2.95   | 66035  | 0.075 | 1.34       | 9.64     |
| 22          | 35.878 | 493381  | 8.79   | 171986 | 0.1   | 4          | 25.12    |
| 23          | 40.255 | 40843   | 0.73   | 11841  | 0.118 | 0.33       | 1.73     |
| 24          | 42.774 | 184413  | 3.28   | 22078  | 0.303 | 1.5        | 3.22     |
| 25          | 47.66  | 51683   | 0.92   | 9885   | 0.171 | 0.42       | 1.44     |
| 26          | 76.665 | 1532021 | 27.29  | 539263 | 0.135 | 12.43      | 78.75    |

100.01



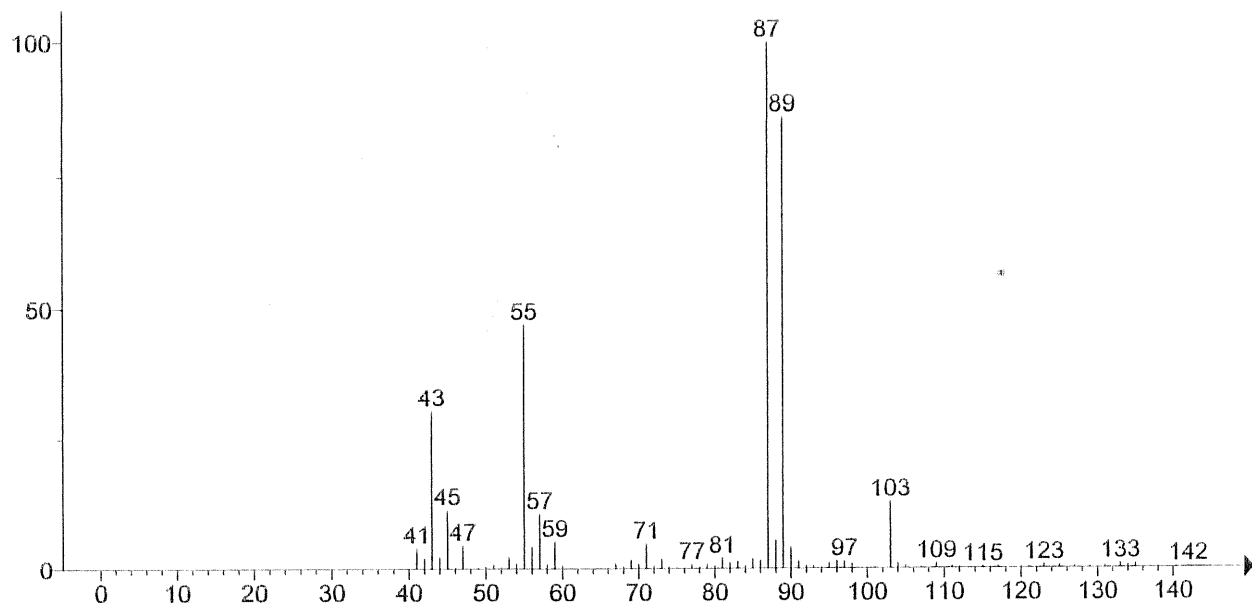

(Text File) +EI Scan (5.166 min) ALI-DRAG-H4-220421-.D Subtract

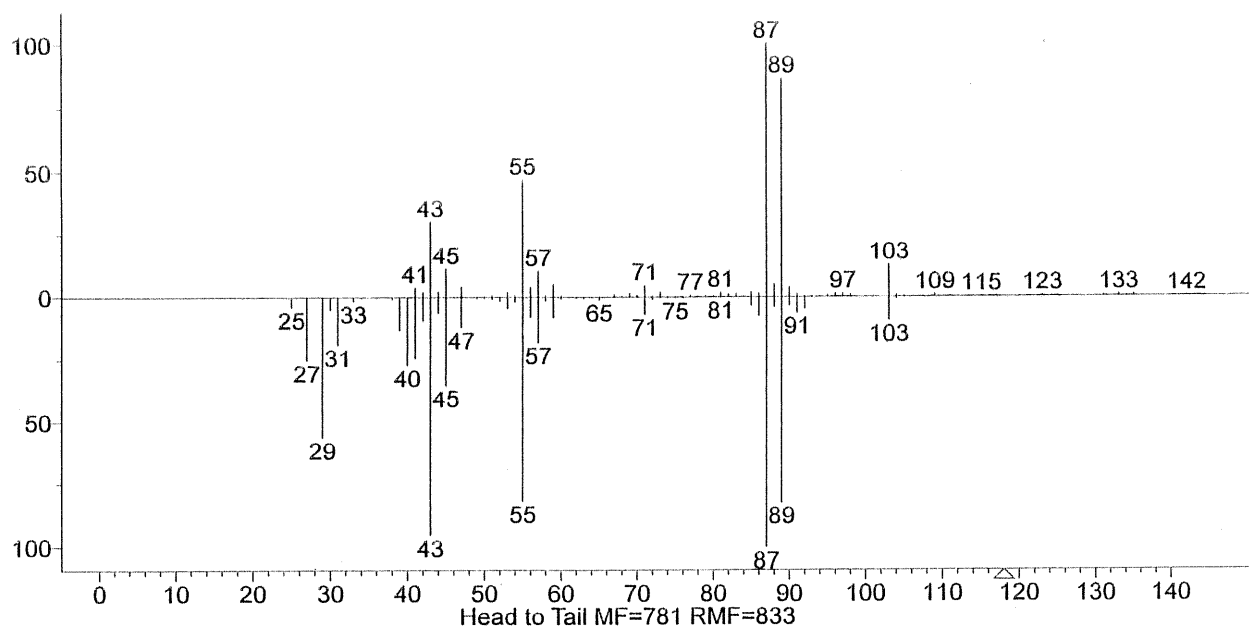

Head to Tail MF=781 RMF=833

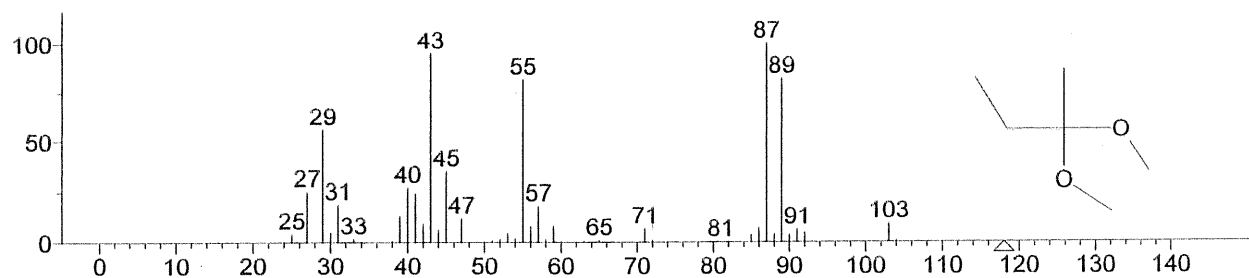

(mainlib) 2,2-Dimethoxybutane

Name: 2,2-Dimethoxybutane

Formula: C<sub>6</sub>H<sub>14</sub>O<sub>2</sub>

MW: 118 CAS#: 3453-99-4 NIST#: 250250 ID#: 48775 DB: mainlib

Other DBs: None

Contributor: TNO Volatile Compounds in Food - Chemical Concepts

10 largest peaks:

87 999 | 43 950 | 89 822 | 55 817 | 29 560 | 45 351 | 40 270 | 27 251 | 41 242 | 31 188 |

Synonyms:

no synonyms.

Estimated non-polar retention index (n-alkane scale):

Value: 685 iu

Confidence interval (Ethers): 68(50%) 293(95%) iu

Retention index.

1. Value: 748.5 iu

Column Type: Capillary

Column Class: Semi-standard non-polar

Active Phase: SE-54

Column

Length: 30 m

Carrier Gas: He

Column Diameter: 0.25 mm

Phase Thickness: 0.25 µm

Data Type: Normal

alkane RI

Program Type: Complex

Description: 40C(5min) => 4C/min => 230C(20min) => 5C/min => 280C (5min)

Source: Gao, H.; Zhao, T.; Kong, Q.; Chen, X.; Hu, Z., Analysis of unknown organic pollutants in sewage by solid-phase extraction combined with gas chromatography-mass spectrometry, J. Chromatogr. Sci., 42, 2004, 91-99.



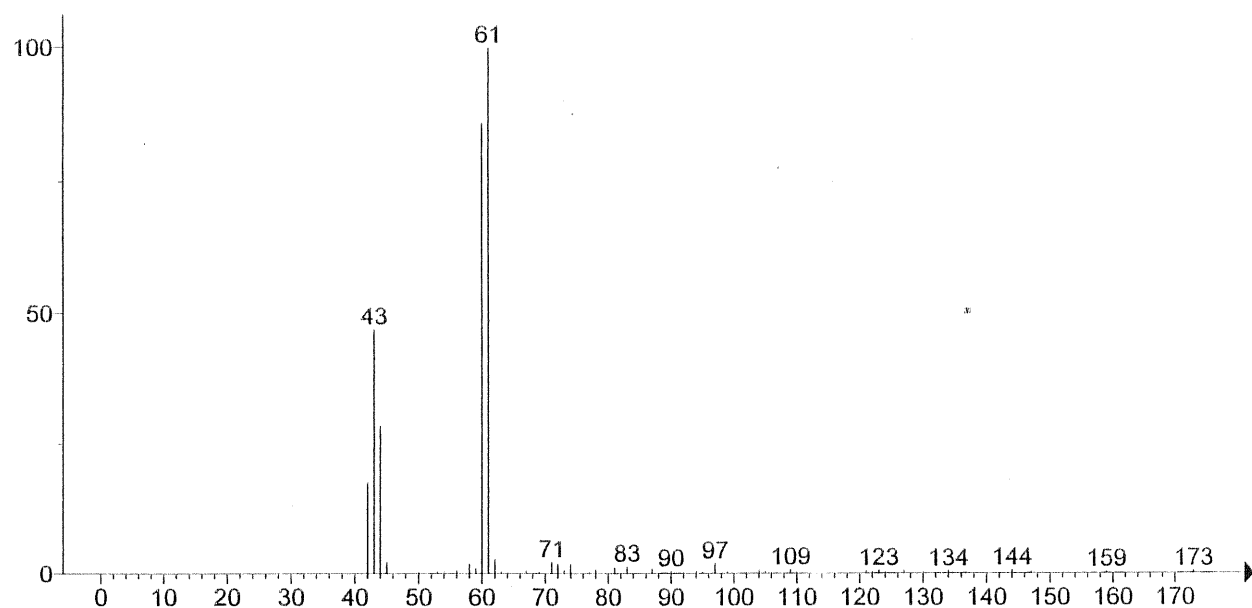

(Text File) +EI Scan (7.354 min) ALI-DRAG-H4-220421-.D Subtract

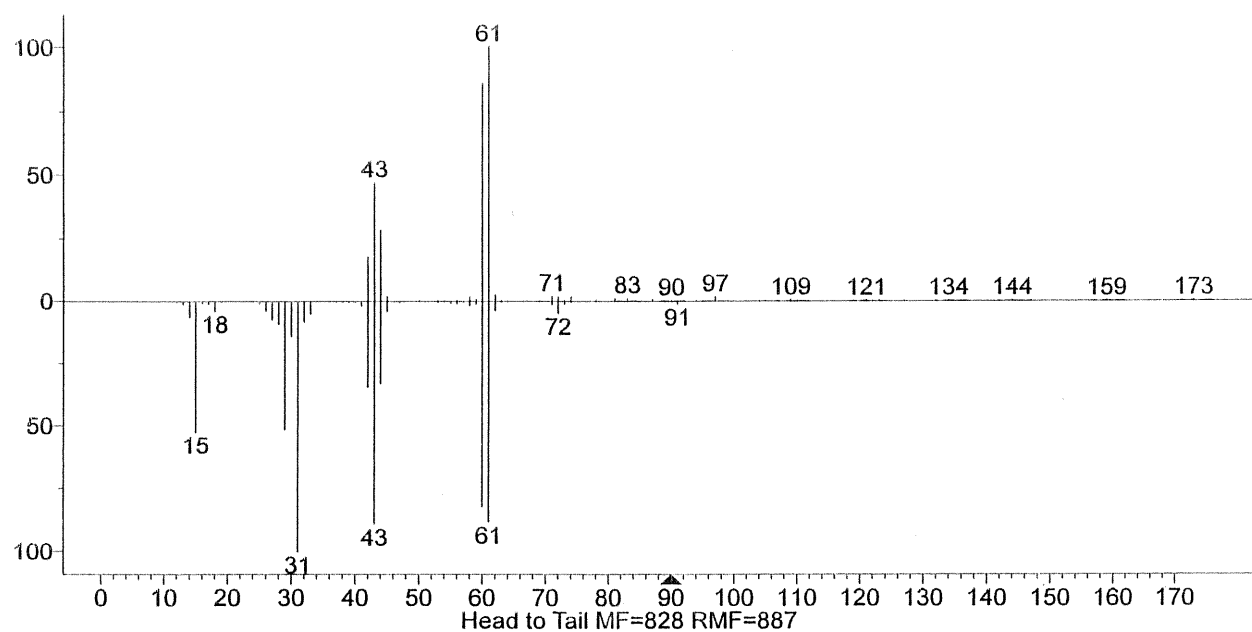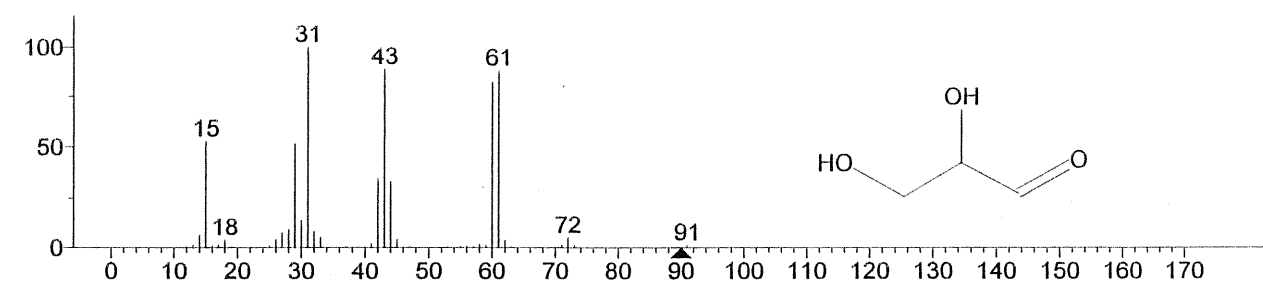

(mainlib) dl-Glyceraldehyde

Name: dl-Glyceraldehyde

Formula: C<sub>3</sub>H<sub>6</sub>O<sub>3</sub>

MW: 90 CAS#: 56-82-6 NIST#: 228082 ID#: 1361 DB: mainlib

Other DBs: Fine, TSCA, RTECS, HODOC, EINECS

Contributor: Japan AIST/NIMC Database- Spectrum MS-NW-6286

10 largest peaks:

31 999 | 43 888 | 61 880 | 60 821 | 15 525 | 29 515 | 42 346 | 44 331 | 30 139 | 28 92 |

Synonyms:

1. Propanal, 2,3-dihydroxy-, (±)-

2. Propanal, 2,3-dihydroxy-, (.+-.)-

3. Glyceraldehyde, dl-

4. Glyceraldehyde, (±)-

5. DL-Glyceric aldehyde

6. 2,3-Dihydroxypropanal #

Estimated non-polar retention index (n-alkane scale):

Value: 913 iu

Confidence interval (Diverse functional groups): 89(50%) 382(95%) iu

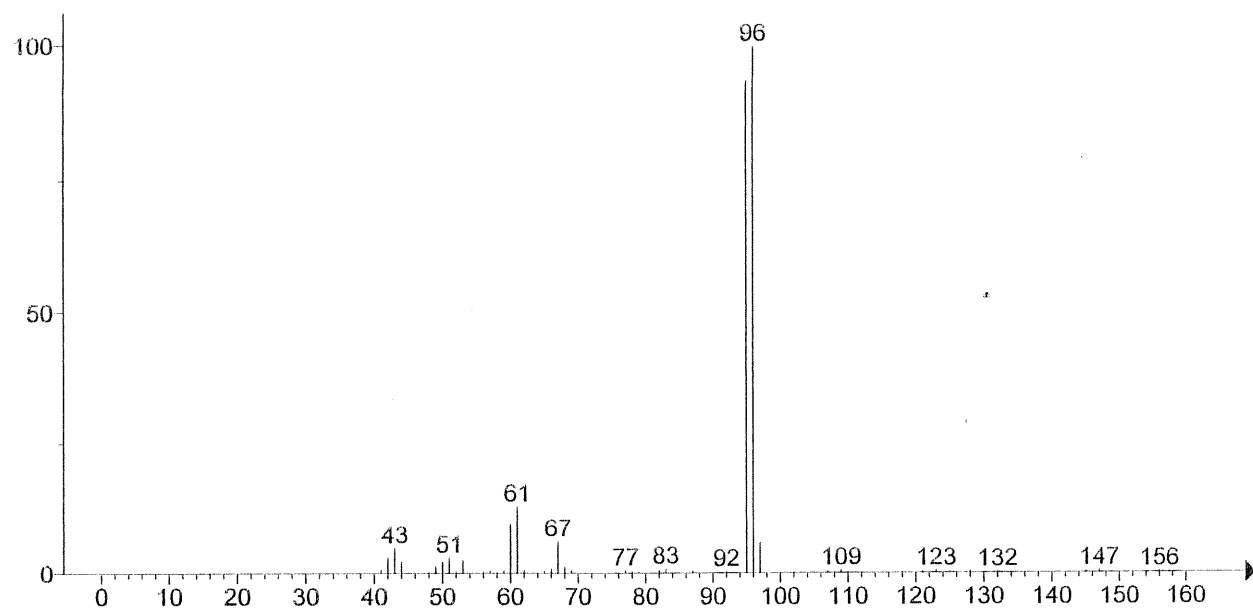

(Text File) +EI Scan (7.818 min) ALI-DRAG-H4-220421-.D Subtract

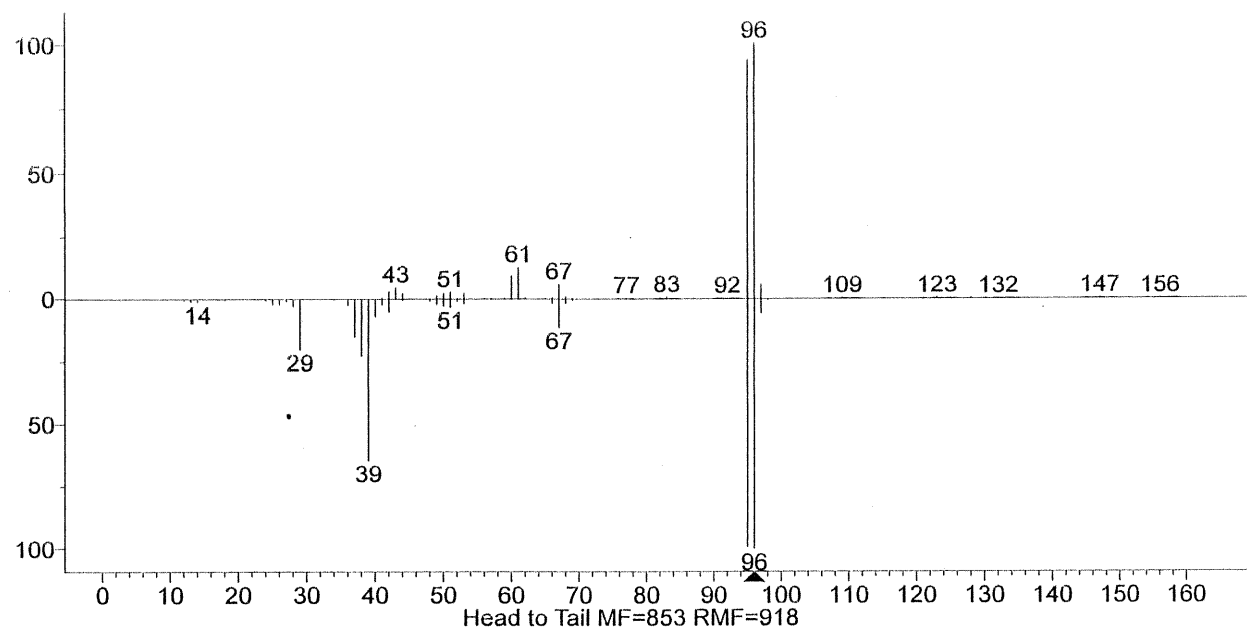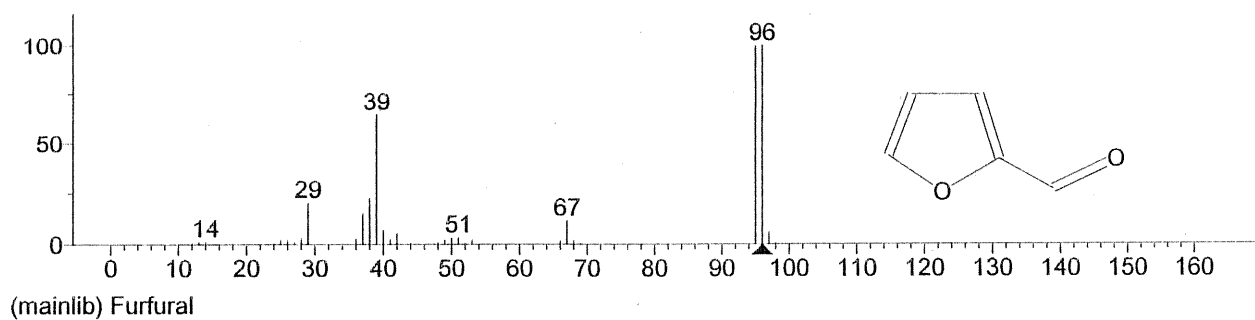

(mainlib) Furfural

Name: Furfural

Formula: C<sub>5</sub>H<sub>4</sub>O<sub>2</sub>

MW: 96 CAS#: 98-01-1 NIST#: 118785 ID#: 59378 DB: mainlib

Other DBs: Fine, TSCA, RTECS, EPA, HODOC, NIH, EINECS, IRDB

Contributor: NIST Mass Spectrometry Data Center, 1990.

10 largest peaks:

96 999 | 95 991 | 39 644 | 38 226 | 29 201 | 37 151 | 67 114 | 40 69 | 97 57 | 42 53 |

Synonyms:

1.2-Furancarboxaldehyde  
2.2-Furaldehyde  
3.α-Furole  
4.Artificial ant oil  
5.Fural  
6.Furaldehyde  
7.Furale  
8.Furancarbonal  
9.Furfuraldehyde  
10.Furfurole  
11.Furfurylaldehyde  
12.Furole  
13.Pyromucic aldehyde  
14.2-Formylfuran  
15.2-Furanaldehyde  
16.2-Furancarbonal  
17.2-Furfural  
18.2-Furfuraldehyde  
19.2-Furylaldehyde  
20.Furol  
21.2-Furylmethanal  
22.Artificial oil of ants  
23.Furfurale  
24.Furfurol  
25.Nci-C56177  
26.2-Furil-metanale  
27.2-Furankarbaldehyd  
28.Furfuralu  
29.Rcra waste number U125  
30.UN 1199  
31.2-Furylaldehyde xypropane  
32.2-Furylcarboxaldehyde  
33.Cyclic aldehyde  
34.Qo furfural

Estimated non-polar retention index (n-alkane scale):

Value: 831 iu

Confidence interval (Diverse functional groups): 89(50%) 382(95%) iu

Retention index.

1. Value: 794 iu

Column Type: Capillary

Column Class: Standard non-polar

Active Phase: CP Sil 5 CB

Column

Length: 60 m

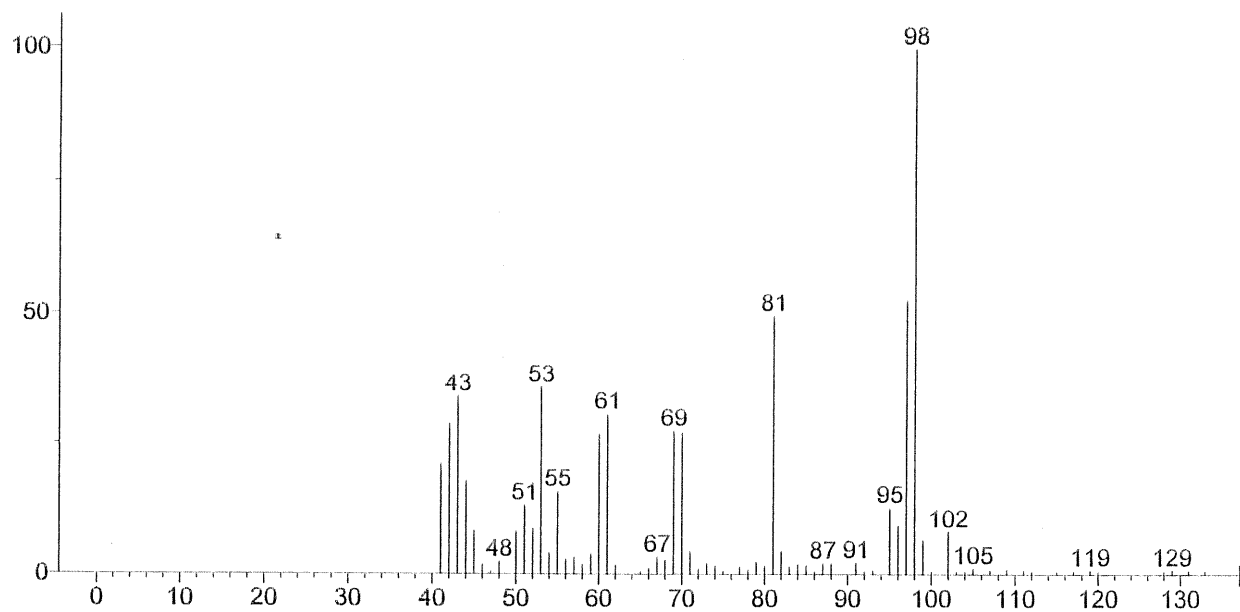

(Text File) +EI Scan (8.584 min) ALI-DRAG-H4-220421-.D

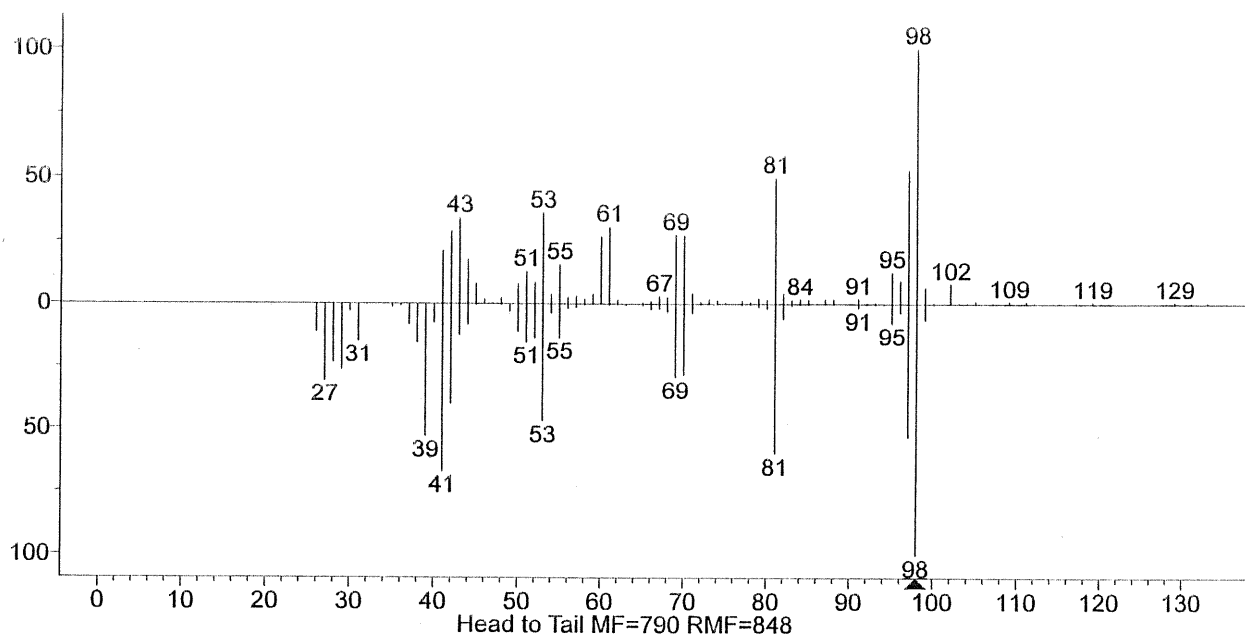

Head to Tail MF=790 RMF=848

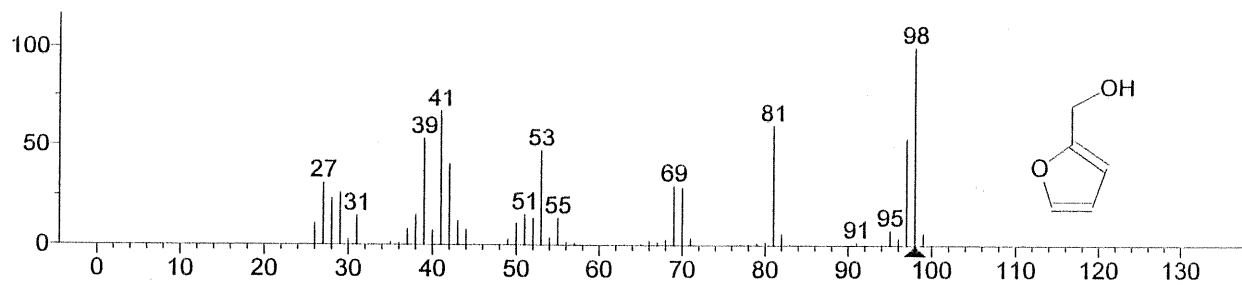

(replib) 2-Furanmethanol

Name: 2-Furanmethanol

Formula: C<sub>5</sub>H<sub>6</sub>O<sub>2</sub>

MW: 98 CAS#: 98-00-0 NIST#: 149344 ID#: 12838 DB: replib

Other DBs: Fine, TSCA, RTECS, EPA, HODOC, NIH, EINECS, IRDB

Contributor: Chemical Concepts

10 largest peaks:

98 999 | 41 668 | 81 597 | 97 532 | 39 529 | 53 469 | 42 403 | 27 307 | 69 294 | 70 284 |

Synonyms:

1. Furfuryl alcohol
2.  $\alpha$ -Furfuryl alcohol
3.  $\alpha$ -Furylcarbinol
4. Furfuralcohol
5. Furyl alcohol
6. Furylcarbinol
7. 2-(Hydroxymethyl)furan
8. 2-Furancarbinol
9. 2-Furanylmethanol
10. 2-Furfuryl alcohol
11. 2-Furylcarbinol
12. 2-Furylmethanol
13. 5-Hydroxymethylfuran
14. Furfural alcohol
15. Methanol, (2-furyl)-
16. NCI-C56224
17. 2-Furfurylalkohol
18. UN 2874
19. 5-Hydroxymethylfuranal
20. FA
21. Qo furfuryl alcohol

Estimated non-polar retention index (n-alkane scale):

Value: 885 iu

Confidence interval (Diverse functional groups): 89(50%) 382(95%) iu

Retention index.

1. Value: 819 iu

Column Type: Capillary

Column Class: Standard non-polar

Active Phase: CP Sil 5 CB

Column

Length: 60 m

Carrier Gas: He

Column Diameter: 0.32 mm

Phase Thickness: 0.25  $\mu$ m

Data Type: Linear

RI

Program Type: Ramp

Start T: 60 C

End T: 280 C

Heat Rate: 3 K/min

Start Time: 10 min

End Time: 60

min

Source: Pino, J.; Almora, K.; Marbot, R., Volatile components of papaya (*Carica papaya* L., maradol variety)

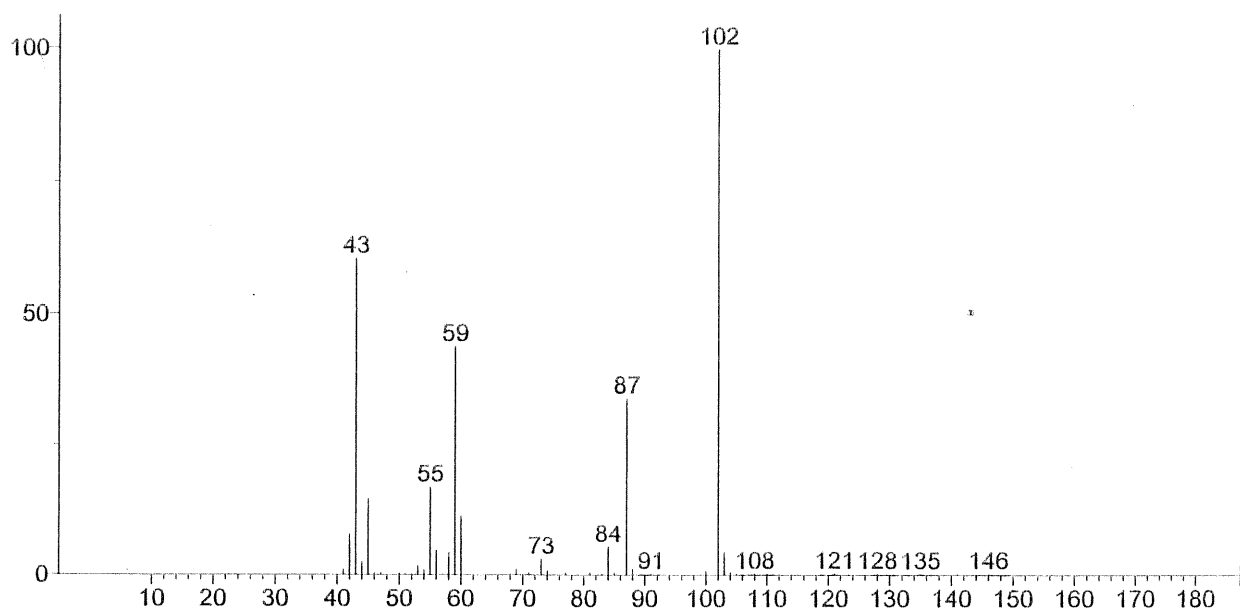

(Text File) +EI Scan (9.514 min) ALI-DRAG-H4-220421-.D Subtract

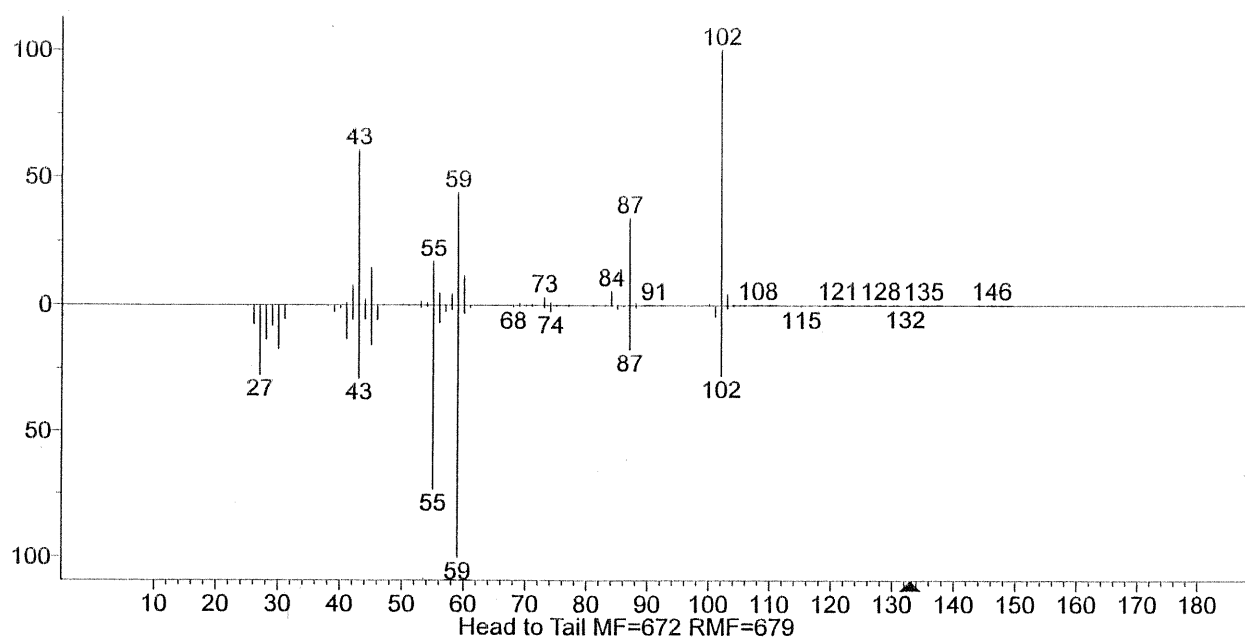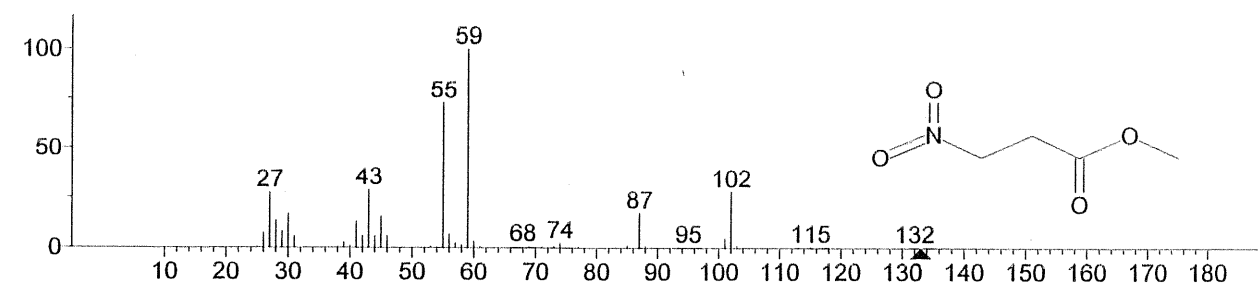

(mainlib) Propanoic acid, 3-nitro-, methyl ester

Name: Propanoic acid, 3-nitro-, methyl ester

Formula:  $C_4H_7NO_4$

MW: 133 CAS#: 20497-95-4 NIST#: 188743 ID#: 26333 DB: mainlib

Other DBs: None

Contributor: Chemical Concepts

10 largest peaks:

59 999 | 55 729 | 43 287 | 102 277 | 27 274 | 87 172 | 30 171 | 45 154 | 28 134 | 41 132 |

Synonyms:

1.Methyl 3-nitropropanoate #

Estimated non-polar retention index (n-alkane scale):

Value: 968 iu

Confidence interval (Diverse functional groups): 89(50%) 382(95%) iu



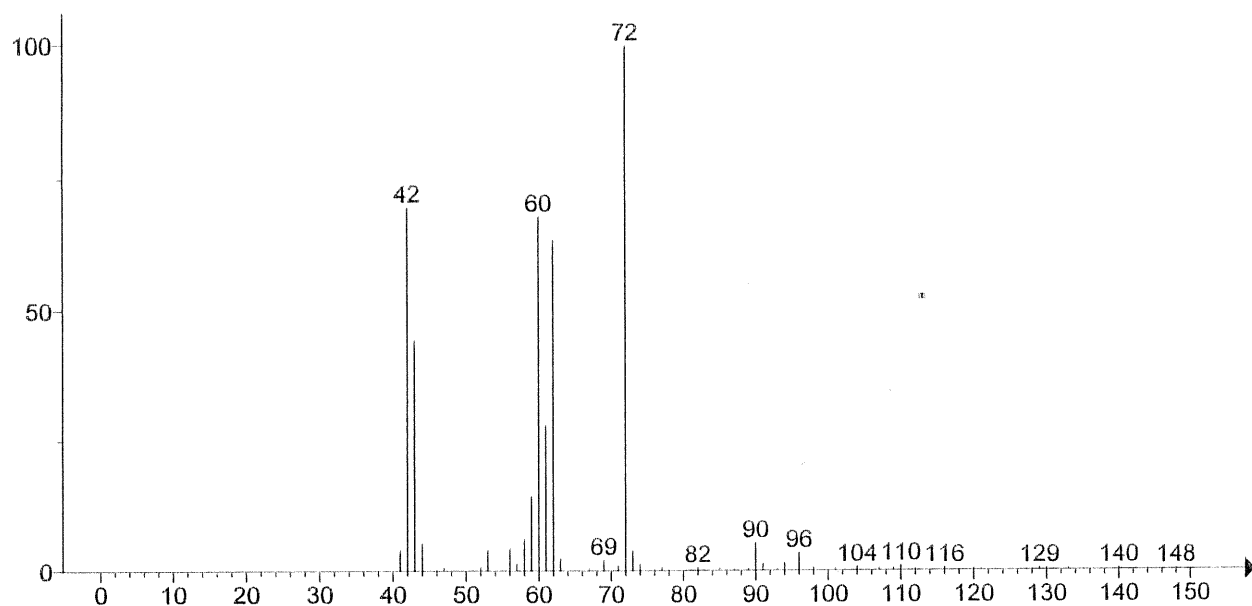

(Text File) +EI Scan (10.106 min) ALI-DRAG-H4-220421-.D Subtract

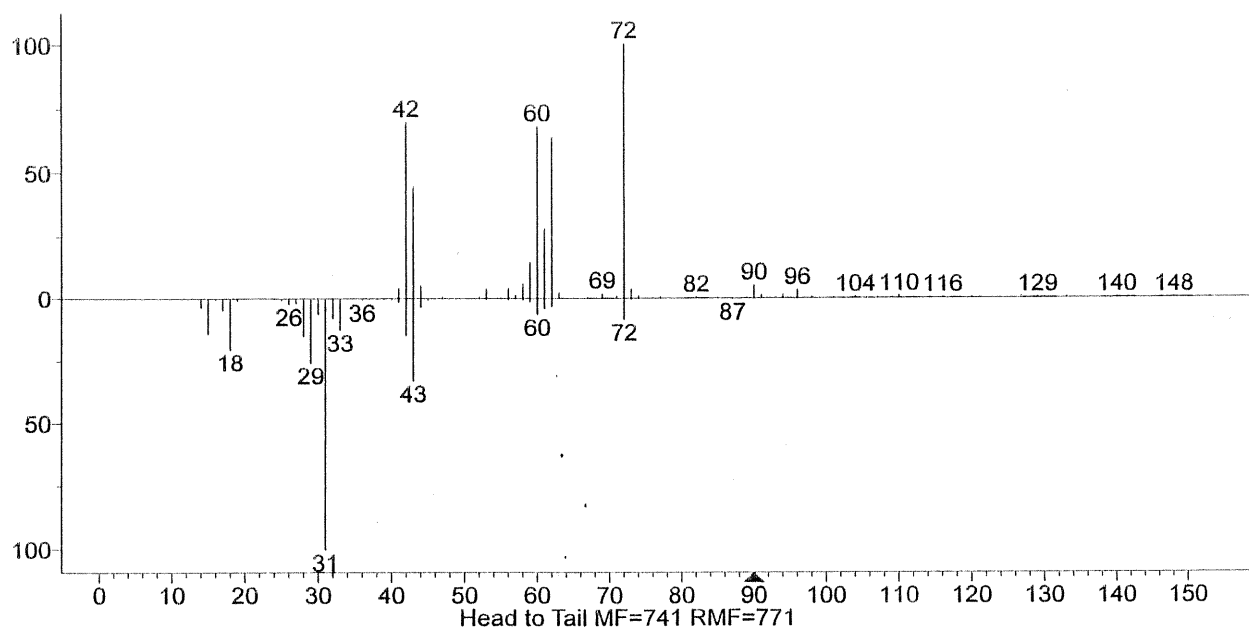

Head to Tail MF=741 RMF=771

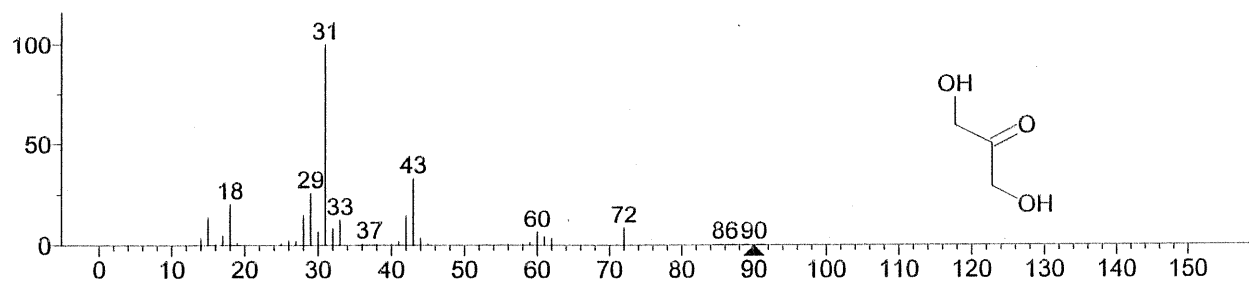

(mainlib) 2-Propanone, 1,3-dihydroxy-

Name: 2-Propanone, 1,3-dihydroxy-

Formula: C<sub>3</sub>H<sub>6</sub>O<sub>3</sub>

MW: 90 CAS#: 96-26-4 NIST#: 743 ID#: 1356 DB: mainlib

Other DBs: Fine, TSCA, RTECS, HODOC, NIH, EINECS

10 largest peaks:

31 999 | 43 330 | 29 257 | 18 204 | 28 150 | 42 147 | 15 140 | 33 125 | 72 83 | 32 80 |

Synonyms:

1. Dihydroxyacetone
2. Chromelin
3. Dihyxl
4. Otan
5. Oxantin
6. Oxatone
7. Soleal
8. Triulose
9. Viticolor
10. 1,3-Dihydroxy-2-propanone
11. 1,3-Dihydroxyacetone
12. NSC-24343
13. 1,3-Dihydroxypropanone
14. 1,3-Dihydroxydimethyl ketone
15. Aliphatic ketone
16. Ketochromin
17. Protosol

Estimated non-polar retention index (n-alkane scale):

Value: 941 iu

Confidence interval (Diverse functional groups): 89(50%) 382(95%) iu

Retention index.

1. Value: 2068 iu

Column Type: Capillary

Column Class: Standard polar

Active Phase: BP-20

Column Length:

30 m

Carrier Gas: He

Column Diameter: 0.25 mm

Phase Thickness: 0.25 µm

Data Type: Normal alkane

RI

Program Type: Complex

Description: 50C(1min) =>2.5C/min =>100C =>2C/min =>180C =>15C/min  
=>220C

Source: Pontes, M.; Marques, J.C.; Camara, J.S., Screening of volatile composition from Portuguese multifloral honeys using headspace solid-phase microextraction-gas chromatography-quadrupole mass spectrometry, Talanta, 74, 2007, 91-103.

2. Value: 2075 iu

Column Type: Capillary

Column Class: Standard

polar

Active Phase: BP-20

Column Length: 30 m

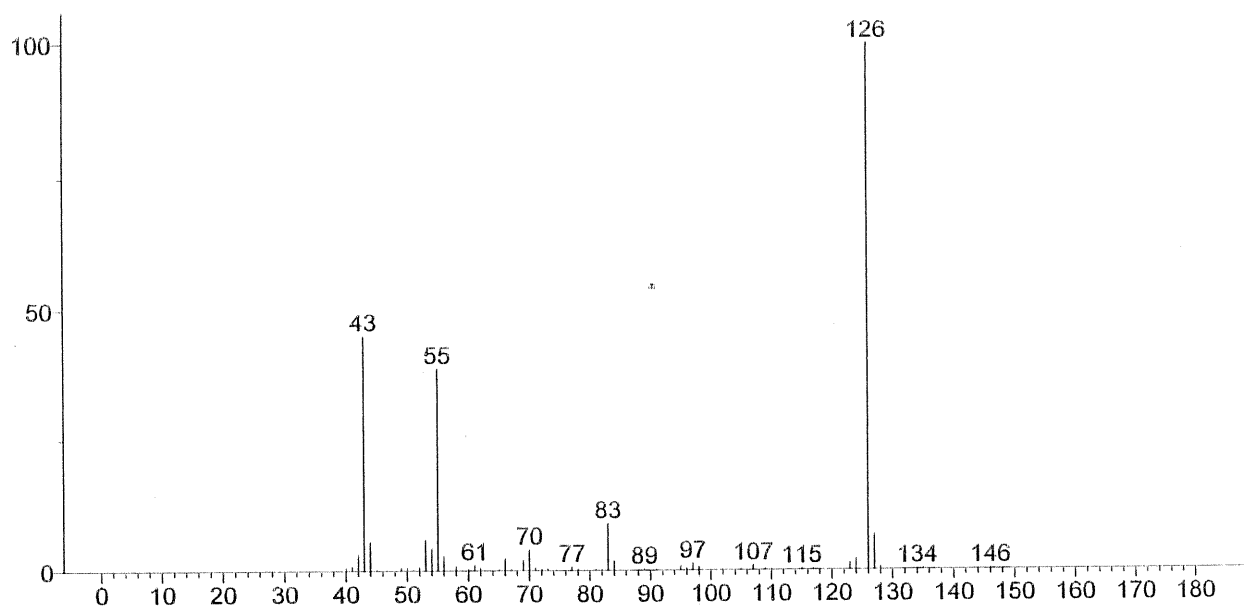

(Text File) +EI Scan (17.871 min) ALI-DRAG-H4-220421-.D Subtract

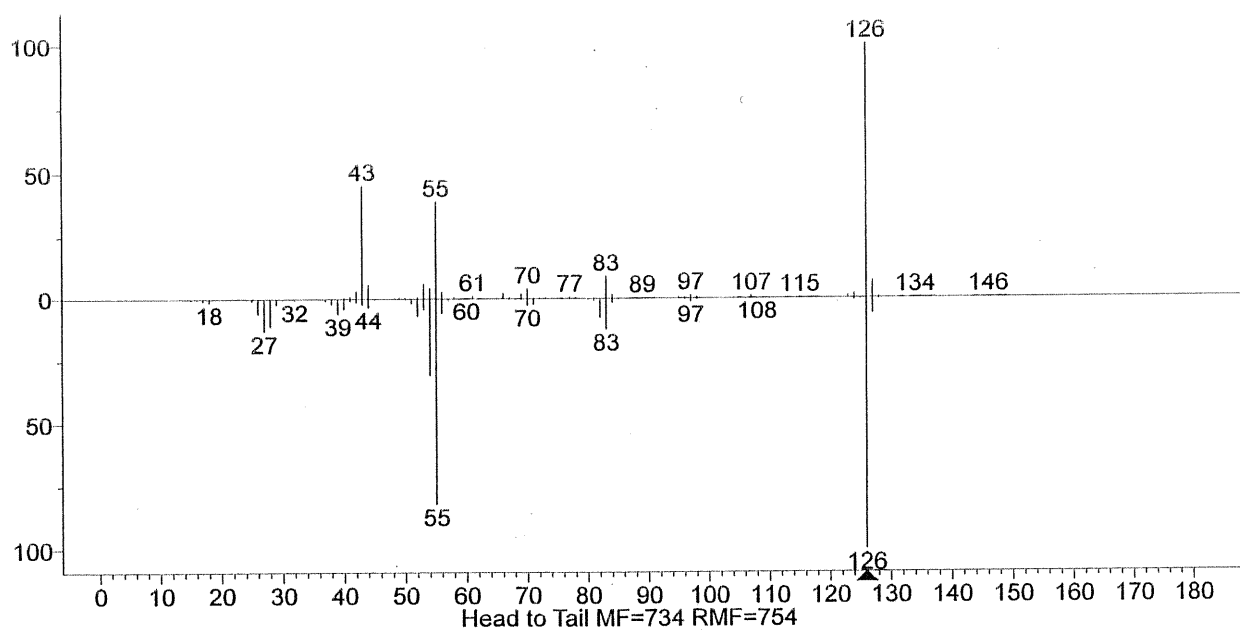

Head to Tail MF=734 RMF=754

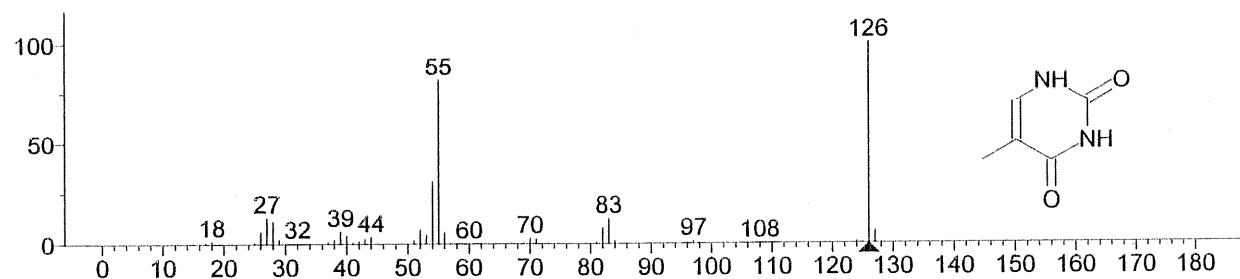

(mainlib) Thymine

Name: Thymine

Formula: C<sub>5</sub>H<sub>6</sub>N<sub>2</sub>O<sub>2</sub>

MW: 126 CAS#: 65-71-4 NIST#: 228115 ID#: 89146 DB: mainlib

Other DBs: Fine, TSCA, RTECS, HODOC, NIH, EINECS

Contributor: Japan AIST/NIMC Database- Spectrum MS-NW- 639

10 largest peaks:

126 999 | 55 818 | 54 306 | 27 131 | 83 124 | 28 112 | 82 78 | 52 72 | 127 63 | 26 62 |

Synonyms:

1.2,4(1H,3H)-Pyrimidinedione, 5-methyl-

2. Thymin

3.2,4-Dihydroxy-5-methylpyrimidine

4.5-Methyluracil

5.5-Methyl-2,4-dioxypyrimidine

6.5-Methyl-2,4(1H,3H)-pyrimidinedione

Estimated non-polar retention index (n-alkane scale):

Value: 1118 iu

Confidence interval (Nitrogen-containing): 83(50%) 356(95%) iu

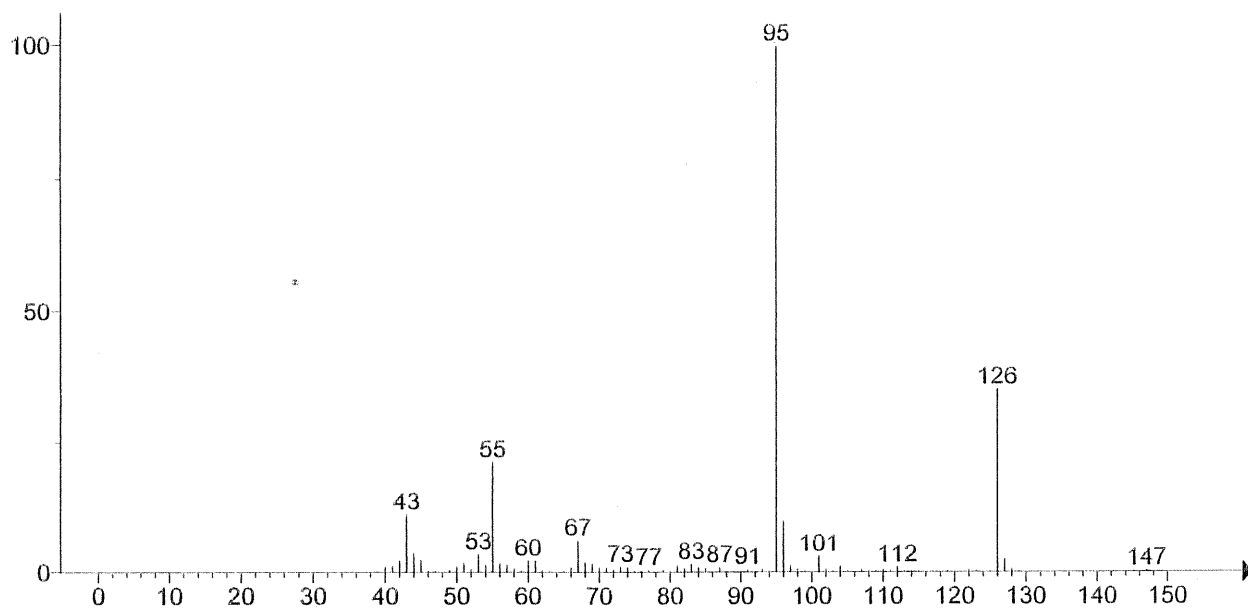

(Text File) +EI Scan (18.135 min) ALI-DRAG-H4-220421-.D

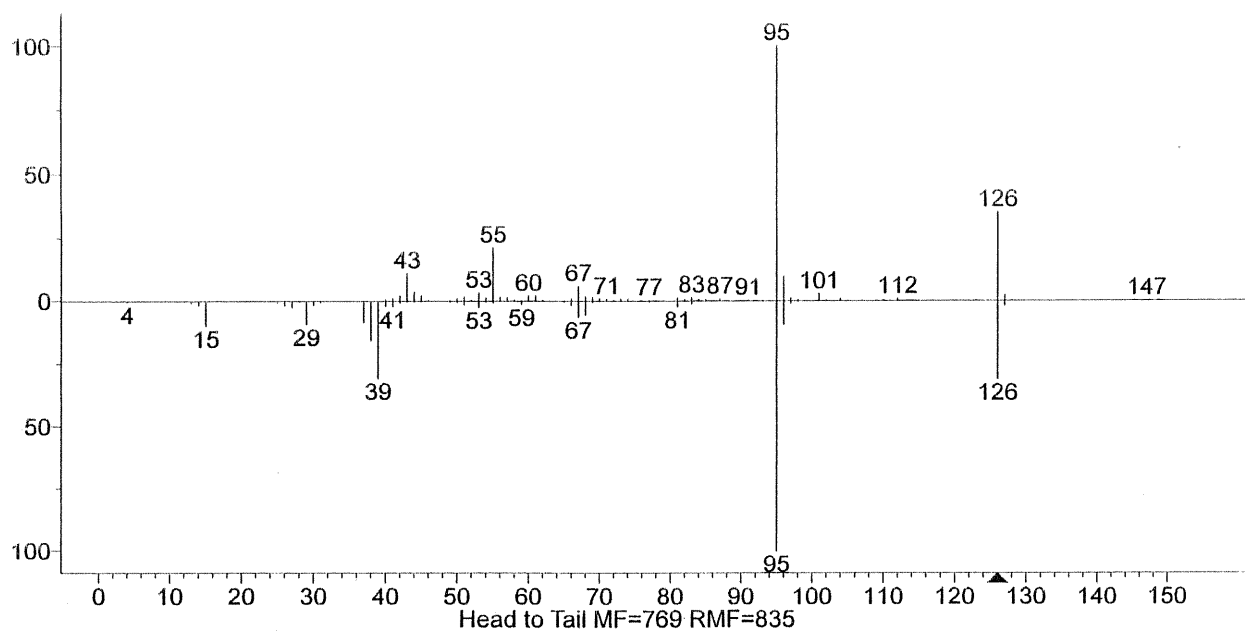

Head to Tail MF=769 RMF=835

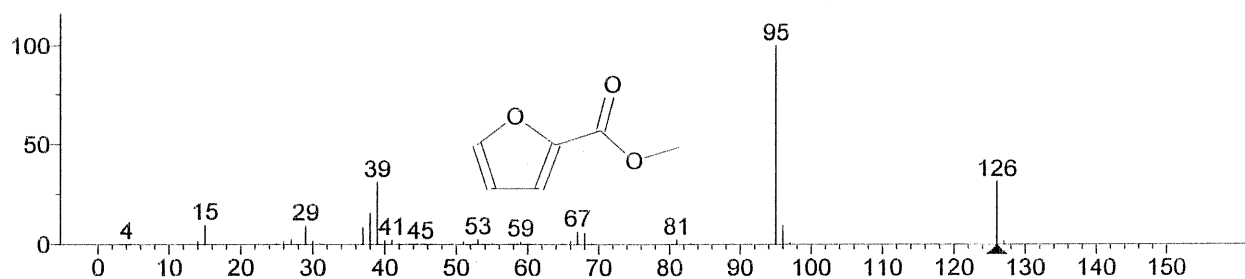

(mainlib) Methyl 2-furoate

Name: Methyl 2-furoate

Formula: C<sub>6</sub>H<sub>6</sub>O<sub>3</sub>

MW: 126 CAS#: 611-13-2 NIST#: 134082 ID#: 58739 DB: mainlib

Other DBs: TSCA, RTECS, HODOC, NIH, EINECS, IRDB

Contributor: NIST Mass Spectrometry Data Center, 1994

10 largest peaks:

95 999 | 126 311 | 39 307 | 38 156 | 15 98 | 96 94 | 29 92 | 37 85 | 67 63 | 68 55 |

Synonyms:

1.2-Furancarboxylic acid, methyl ester

2.2-Furoic acid, methyl ester

3.Methyl pyromucate

4.Methyl 2-furancarboxylate

5.Pyromucic acid methyl ester

6.Methyl  $\alpha$ -furoate

7.Methyl furoate

8.Furan- $\alpha$ -carboxylic acid methyl ester

9.2-Furancarboxylic acid, methyl ester

Estimated non-polar retention index (n-alkane scale):

Value: 909 iu

Confidence interval (Diverse functional groups): 89(50%) 382(95%) iu

Retention index.

1. Value: 956 iu

Column Type: Capillary

Column Class: Standard non-polar

Active Phase: SE-30

Data Type:

Normal alkane RI

Program Type: Ramp

Source: Vinogradov, B.A., Production, composition, properties and application of essential oils, 2004.

2. Value: 956 iu

Column Type: Capillary

Column Class: Standard non

-polar

Active Phase: OV-101

Column Length: 50 m

Column Diameter: 0.22 mm

Data Type: Normal alkane

RI

Program Type: Ramp

Start T: 80 C

End T: 200 C

Heat Rate: 2 K/min

Source: Egolf, L.M.; Jurs, P.C.,

Quantitative structure-retention and structure-odor intensity relationships for a diverse group of odor-active compounds, Anal. Chem., 65, 1993, 3119-3126.

<...>

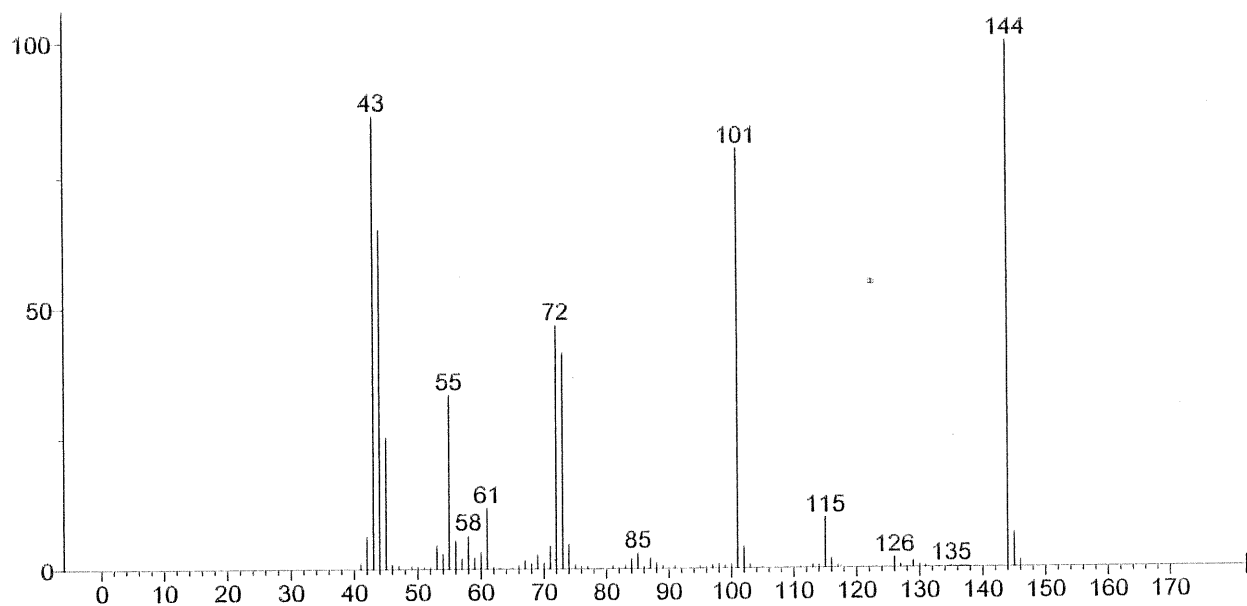

(Text File) +EI Scan (20.579 min) ALI-DRAG-H4-220421-.D

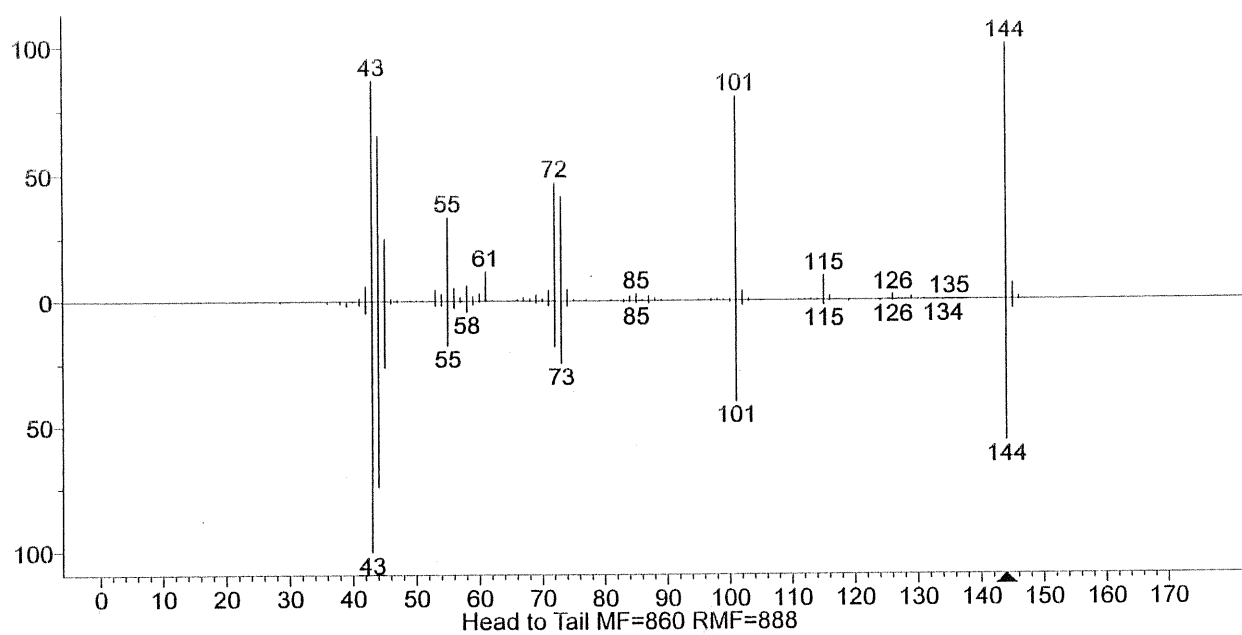

Head to Tail MF=860 RMF=888

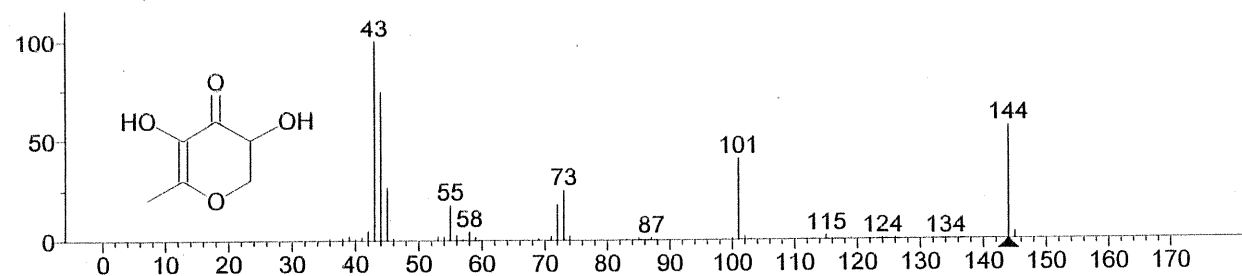

(replib) 4H-Pyran-4-one, 2,3-dihydro-3,5-dihydroxy-6-methyl-

Name: 4H-Pyran-4-one, 2,3-dihydro-3,5-dihydroxy-6-methyl-

Formula: C<sub>6</sub>H<sub>8</sub>O<sub>4</sub>

MW: 144 CAS#: 28564-83-2 NIST#: 108691 ID#: 1857 DB: replib

Other DBs: RTECS

Contributor: Philip Morris R&D

10 largest peaks:

43 999 | 44 742 | 144 563 | 101 402 | 45 264 | 73 249 | 72 182 | 55 177 | 42 48 | 58 43 |

Synonyms:

1,3,5-Dihydroxy-6-methyl-2,3-dihydro-4H-pyran-4-one #

Estimated non-polar retention index (n-alkane scale):

Value: 1269 iu

Confidence interval (Diverse functional groups): 89(50%) 382(95%) iu

Retention index.

1. Value: 1119 iu

Column Type: Capillary

Column Class: Standard non-polar

Active Phase: DB-1

Column

Length: 60 m

Carrier Gas: He

Column Diameter: 0.25 mm

Phase Thickness: 0.25 um

Data Type: Linear

RI

Program Type: Complex

Description: -20C (5min) => 10C/min => 100C => 4C/min => 200C => 10C/min => 280C

Source: Eri, S.; Khoo, B.K.; Lech, J.; Hartman, T.G., Direct thermal desorption-gas chromatography and gas chromatography-mass spectrometry profiling of hop (*Humulus lupulus* L.) essential oils in support of varietal characterization, *J. Agric. Food Chem.*, 48, 2000, 1140-1149.

2. Value: 1107 iu

Column Type: Capillary

Column

Class: Standard non-polar

Active Phase: DB-1

Column Length: 60 m

Carrier Gas: N2

Column Diameter: 0.25 mm

Phase Thickness: 1 um

Data Type: Linear RI

Program Type: Ramp

Start T: 30 C

End T: 200 C

Heat

Rate: 5 K/min

End Time: 30 min

Source: Wu, C.-M.; Wang, Z.; Wu, Q.H., Volatile compounds produced from monosodium glutamate in common food cooking, *J. Agric. Food Chem.*, 48, 2000, 2438-2442.

<...>



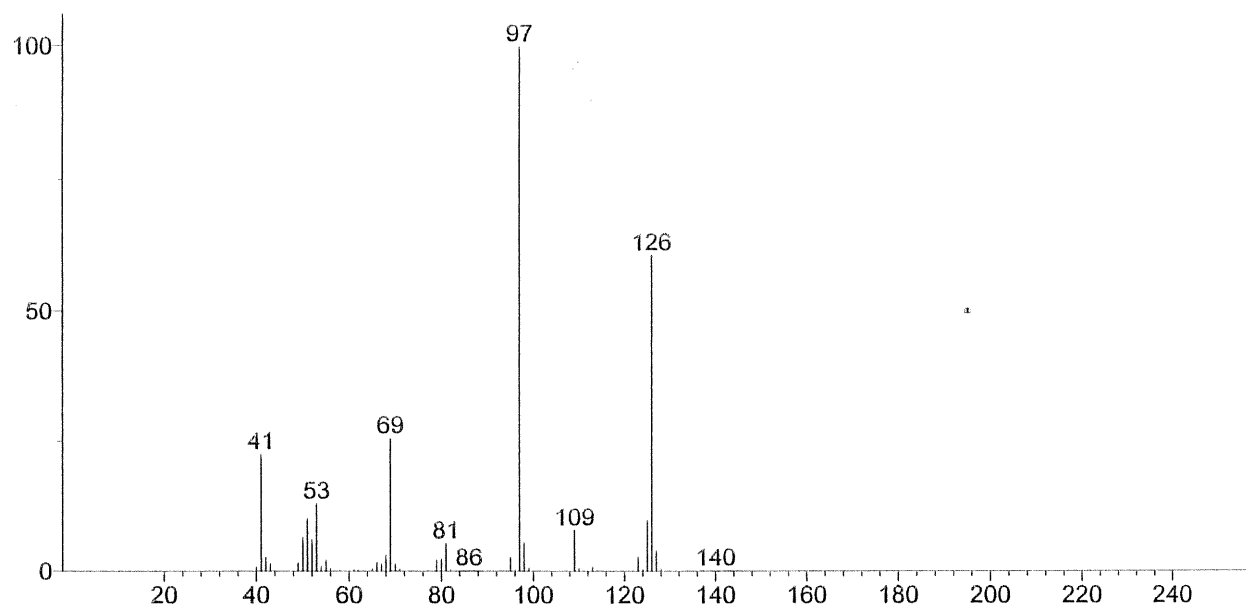

(Text File) +EI Scan (23.786 min) ALI-DRAG-H4-220421-D Subtract

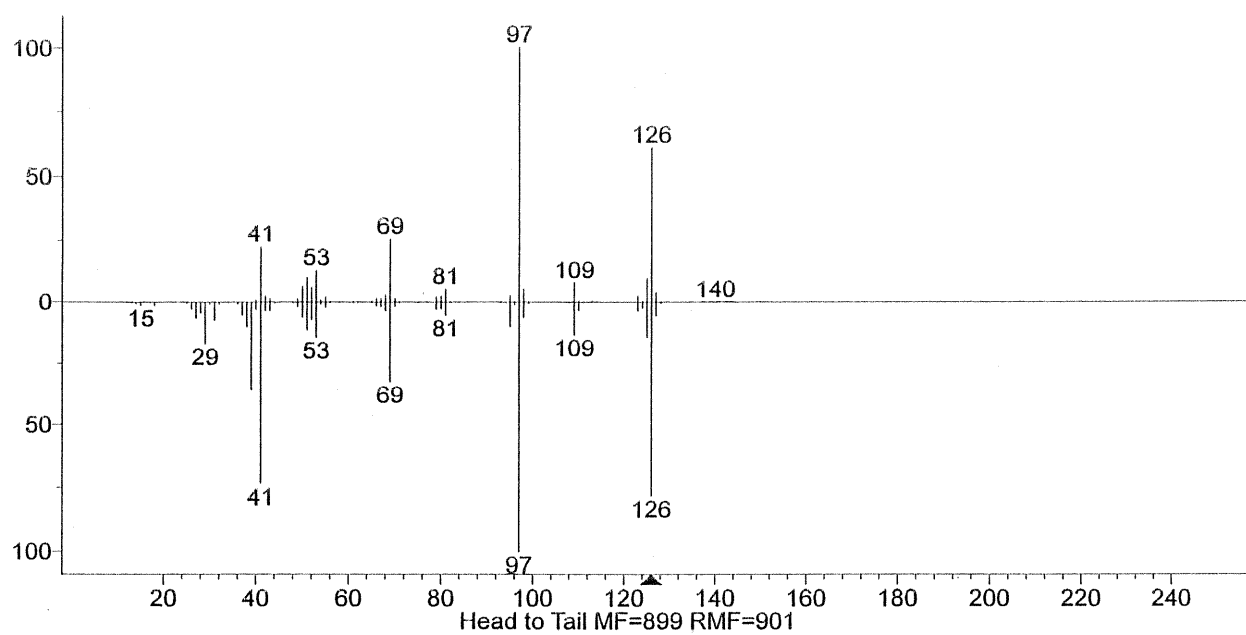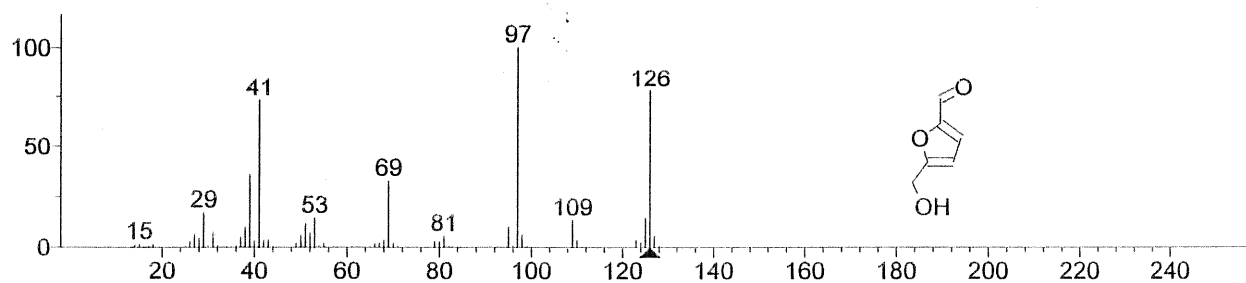

(mainlib) 2-Furancarboxaldehyde, 5-(hydroxymethyl)-

Name: 2-Furancarboxaldehyde, 5-(hydroxymethyl)-

Formula: C<sub>6</sub>H<sub>6</sub>O<sub>3</sub>

MW: 126 CAS#: 67-47-0 NIST#: 231276 ID#: 60271 DB: mainlib

Other DBs: Fine, TSCA, RTECS, HODOC, NIH, EINECS

Contributor: Japan AIST/NIMC Database- Spectrum MS-NW-4745

10 largest peaks:

97 999 | 126 779 | 41 732 | 39 358 | 69 326 | 29 171 | 53 145 | 125 145 | 109 134 | 51 115 |

Synonyms:

1.2-Furaldehyde, 5-(hydroxymethyl)-

2.5-Hydroxymethylfurfural

3.Hydroxymethylfurfurole

4.HMF

5.5-(Hydroxymethyl)Furfurole

6.5-(Hydroxymethyl)-2-formylfuran

7.5-(Hydroxymethyl)-2-furaldehyde

8.5-(Hydroxymethyl)-2-furancarboxal

9.5-(Hydroxymethyl)-2-furfural

10.5-(Hydroxymethyl)-2-furfuraldehyde

11.5-(Hydroxymethyl)furan-2-aldehyde

12.5-(Hydroxymethyl)furfural

13.5-Hydroxymethylfuraldehyde

14.5-Oxymethylfurfurole

15.5-Hydroxymethylfurfuraldehyde

16.5-Hydroxymethyl-2-furancarboxaldehyde

17.Hydroxymethylfurfuraldehyde

18.5-(Hydroxymethyl)-2-furancarboxaldehyde

19.2-Hydroxymethyl-5-furfural

Estimated non-polar retention index (n-alkane scale):

Value: 1163 iu

Confidence interval (Diverse functional groups): 89(50%) 382(95%) iu

Retention index.

1. Value: 1176 iu

Column Type: Capillary

Column Class: Standard non-polar

Active Phase: DB-1

Column

Length: 60 m

Carrier Gas: N<sub>2</sub>

Column Diameter: 0.25 mm

Phase Thickness: 1 µm

Data Type: Linear

RI

Program Type: Ramp

Start T: 30 C

End T: 200 C

Heat Rate: 5 K/min

End Time: 30 min

Source: Wu, C.-M.;

Wang, Z.; Wu, Q.H., Volatile compounds produced from monosodium glutamate in common food cooking, J. Agric. Food Chem., 48, 2000, 2438-2442.

2. Value: 1208 iu

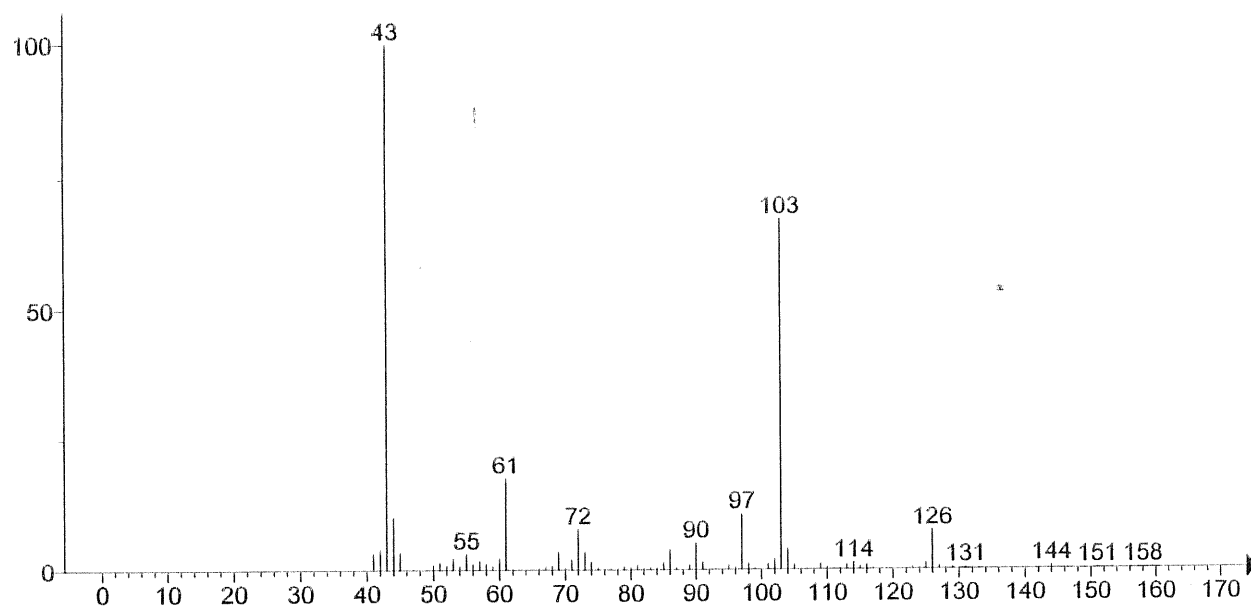

(Text File) +EI Scan (24.264 min) ALI-DRAG-H4-220421-.D

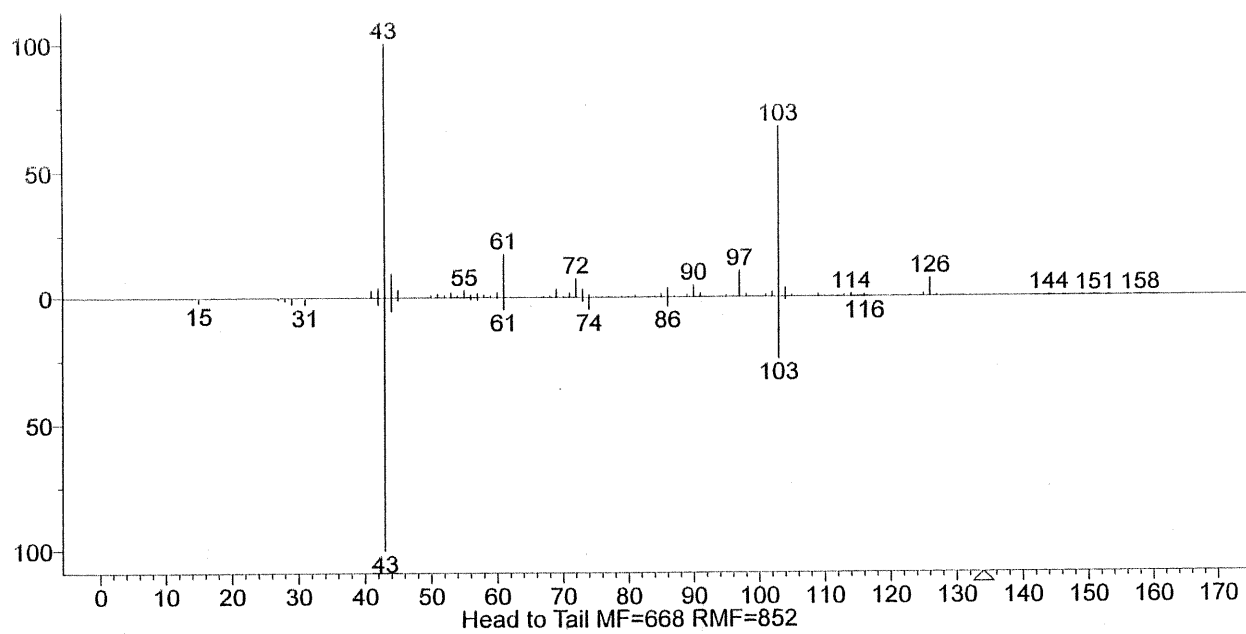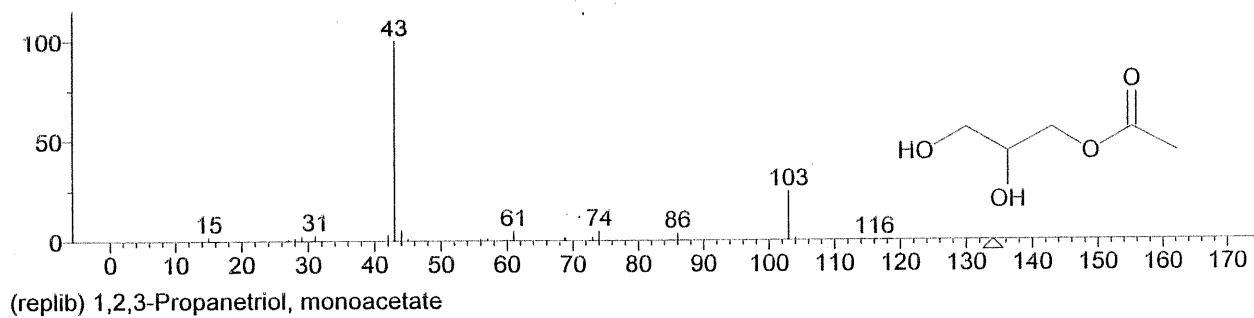

(replib) 1,2,3-Propanetriol, monoacetate

Name: 1,2,3-Propanetriol, monoacetate

Formula: C<sub>5</sub>H<sub>10</sub>O<sub>4</sub>

MW: 134 CAS#: 26446-35-5 NIST#: 76112 ID#: 2817 DB: replib

Other DBs: Fine, TSCA, RTECS, EINECS

Contributor: RADIAN CORP

10 largest peaks:

43 999 | 103 243 | 44 55 | 61 48 | 74 48 | 86 37 | 42 29 | 31 28 | 29 26 | 15 20 |

Synonyms:

1. Acetin, mono-
2. Acetin
3. Acetoglyceride
4. Acetyl monoglyceride
5. Glycerin monoacetate
6. Glycerol acetate
7. Glycerol monoacetate
8. Glyceryl acetate
9. Glyceryl monoacetate
10. Monoacetin
11. Myvacet
12. Glycerol 1-acetate
13. 1-Monoacetin
14. Acetic acid, monoglyceraldehyde
15. Alpha-monoacetin
16. Glycerol  $\alpha$ -monoacetate
17. Hallco C-918
18. Monacetin
19. 2,3-Dihydroxypropyl acetate #

Estimated non-polar retention index (n-alkane scale):

Value: 1091 iu

Confidence interval (Diverse functional groups): 89(50%) 382(95%) iu

Retention index.

1. Value: 2250 iu

Column Type: Capillary

Column Class: Standard polar

Active Phase: DB-FFAP

Column

Length: 30 m

Carrier Gas: H<sub>2</sub>

Column Diameter: 0.32 mm

Phase Thickness: 0.25  $\mu$ m

Data Type: Linear

RI

Program Type: Ramp

Start T: 40 C

End T: 240 C

Heat Rate: 5 K/min

Start Time: 2 min

Source: Charles, M.

; Martin, B.; Ginies, C.; Etievant, P.; Coste, G.; Guichard, E., Potent aroma compounds of two red wine vinegars, J. Agric. Food Chem., 48, 2000, 70-77.

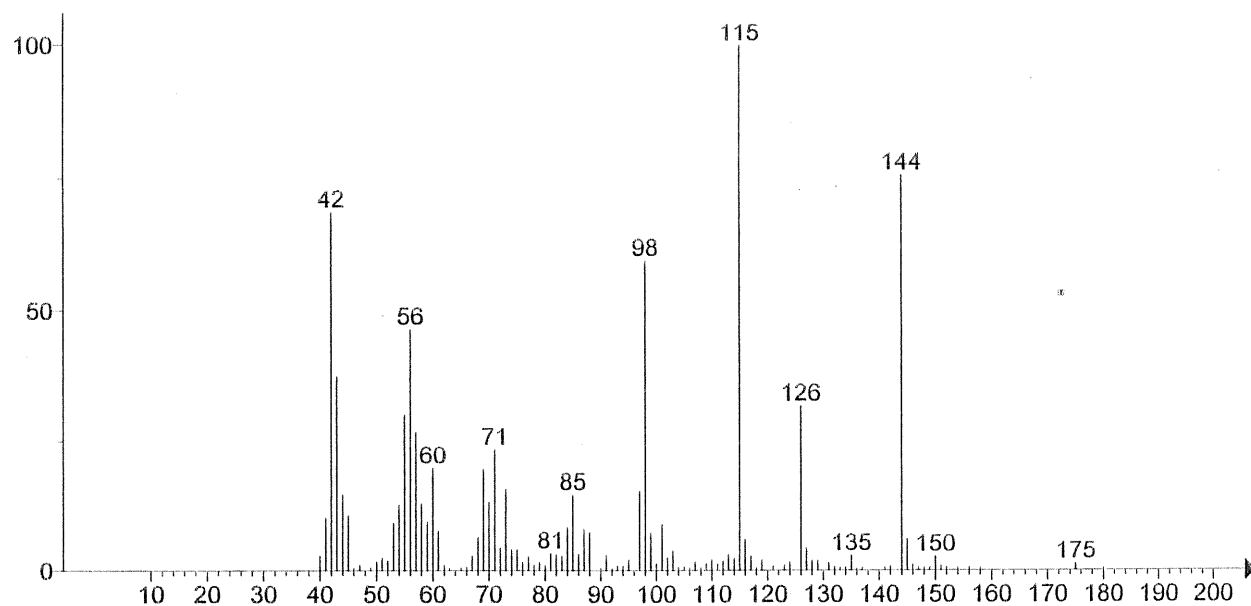

(Text File) +EI Scan (26.905 min) ALI-DRAG-H4-220421-.D

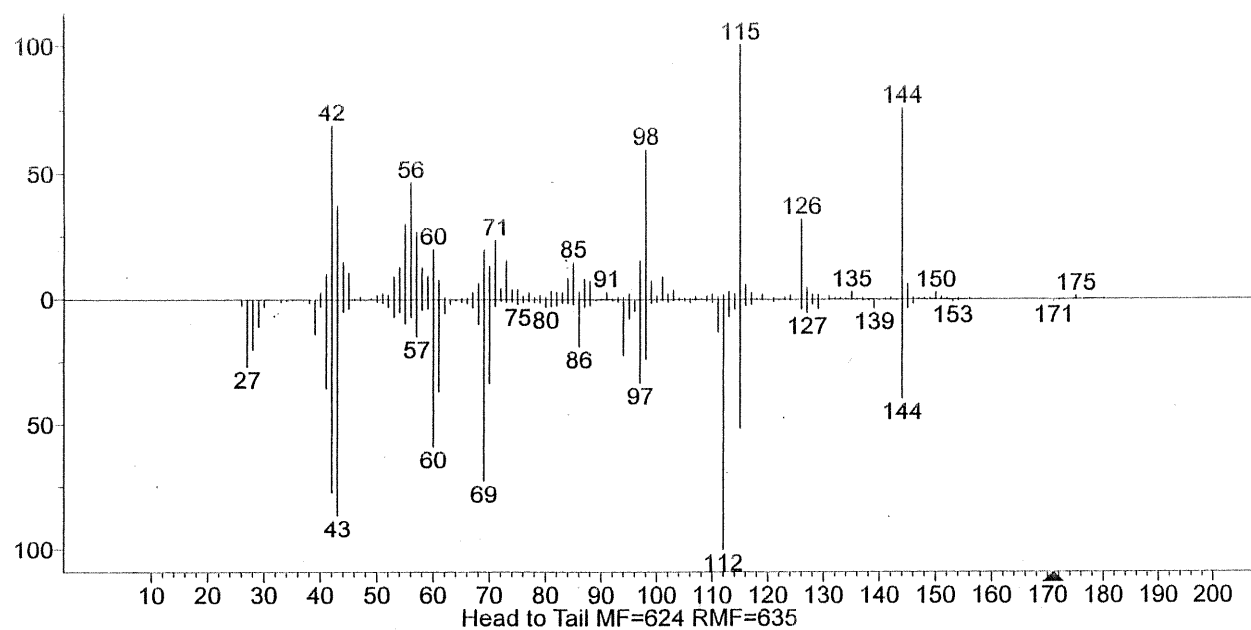

Head to Tail MF=624 RMF=635

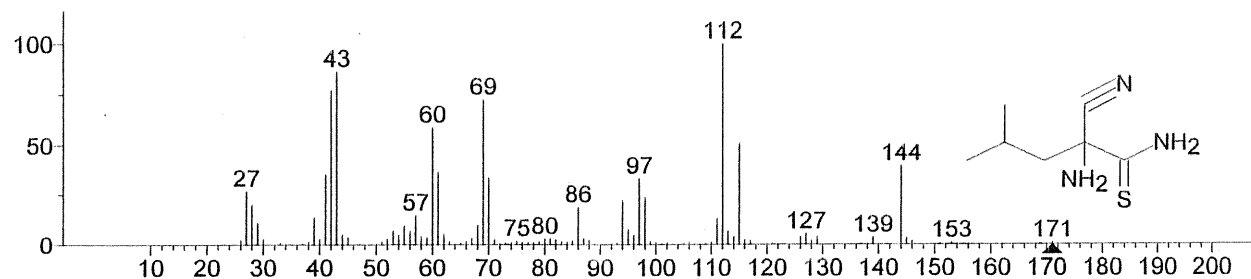

(mainlib) 2-Amino-2-cyano-4-methylpentanethioamide

Name: 2-Amino-2-cyano-4-methylpentanethioamide

Formula:  $C_7H_{13}N_3S$

MW: 171 NIST#: 185735 ID#: 75633 DB: mainlib

Contributor: Chemical Concepts

10 largest peaks:

112 999 | 43 862 | 42 770 | 69 724 | 60 586 | 115 512 | 144 394 | 61 367 | 41 353 | 70 334 |

Synonyms:

no synonyms.

Estimated non-polar retention index (n-alkane scale):

Value: 1686 iu

Confidence interval (Diverse functional groups): 89(50%) 382(95%) iu

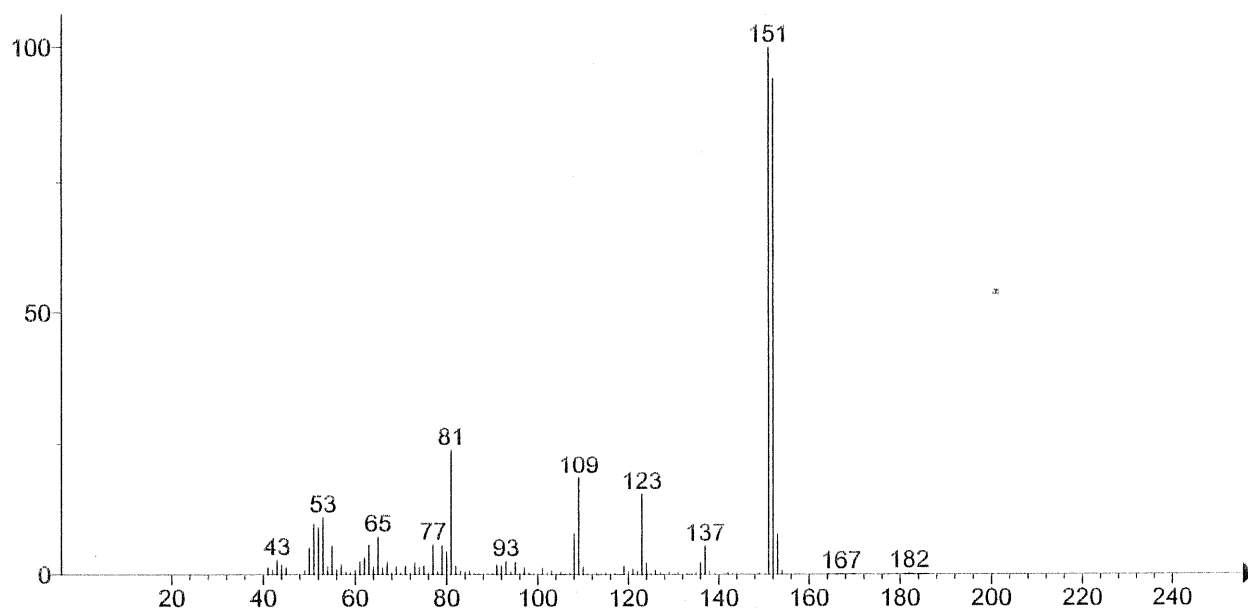

(Text File) +EI Scan (29.805 min) ALI-DRAG-H4-220421-.D

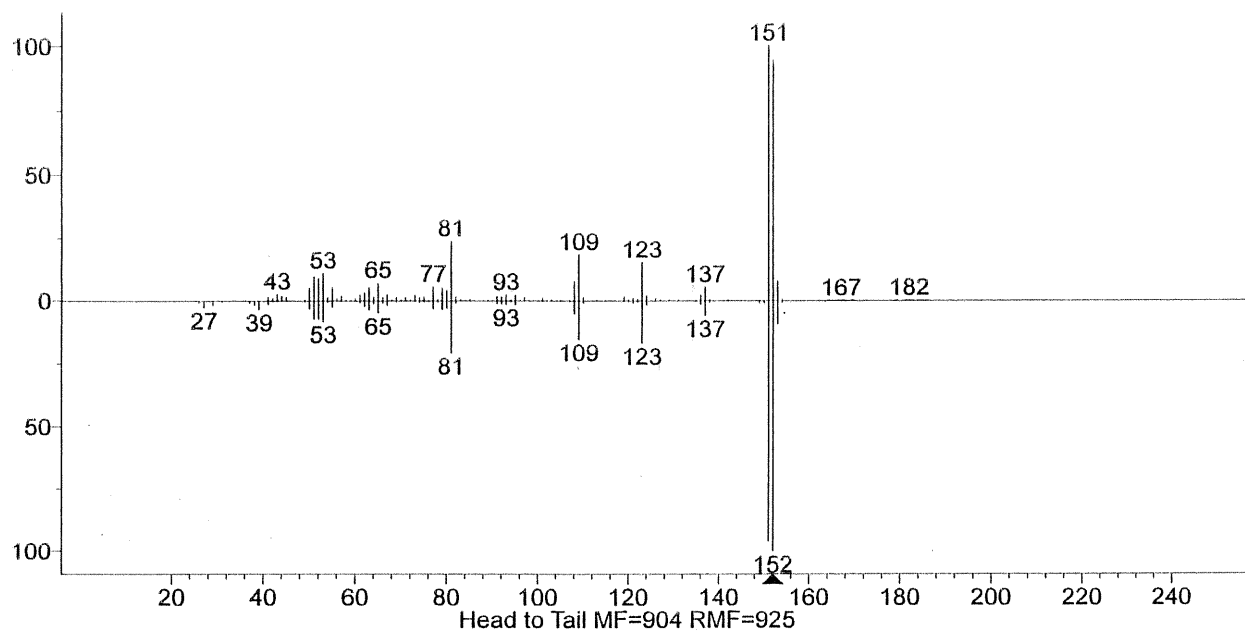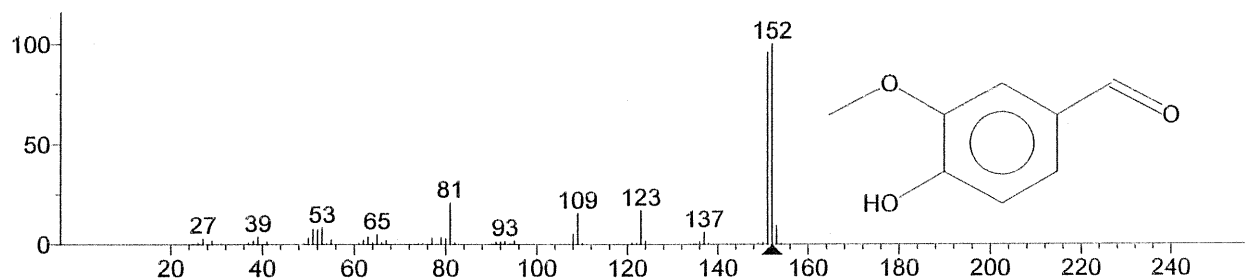

(replib) Vanillin

Name: Vanillin

Formula: C<sub>8</sub>H<sub>8</sub>O<sub>3</sub>

MW: 152 CAS#: 121-33-5 NIST#: 192567 ID#: 20417 DB: replib

Other DBs: Fine, TSCA, RTECS, EPA, USP, HODOC, NIH, EINECS, IRDB

Contributor: Chemical Concepts

10 largest peaks:

152 999 | 151 957 | 81 206 | 123 167 | 109 152 | 153 92 | 53 81 | 51 72 | 52 71 | 137 58 |

Synonyms:

1. Benzaldehyde, 4-hydroxy-3-methoxy-
2. p-Hydroxy-m-methoxybenzaldehyde
3. Lioxin
4. Vanillaldehyde
5. Vanillic aldehyde
6. 2-Methoxy-4-formylphenol
7. 3-Methoxy-4-hydroxybenzaldehyde
8. 4-Formyl-2-methoxyphenol
9. 4-Hydroxy-3-methoxybenzaldehyde
10. 4-Hydroxy-5-methoxybenzaldehyde
11. Vanilla
12. m-Anisaldehyde, 4-hydroxy-
13. Protocatechualdehyde, methyl-
14. Zimco
15. 4-Hydroxy-m-anisaldehyde
16. p-Vanillin
17. Vanillin
18. m-Methoxy-p-hydroxybenzaldehyde
19. Methylprotocatechuic aldehyde
20. Methylprotocatechuic aldehyde

Estimated non-polar retention index (n-alkane scale):

Value: 1392 iu

Confidence interval (Diverse functional groups): 89(50%) 382(95%) iu

Retention index.

1. Value: 1403 iu

Column Type: Capillary

Column Class: Standard non-polar

Active Phase: BP-1

Column

Length: 50 m

Carrier Gas: He

Column Diameter: 0.22 mm

Phase Thickness: 0.25 µm

Data Type: Linear

RI

Program Type: Ramp

Start T: 60 C

End T: 220 C

Heat Rate: 2 K/min

End Time: 20 min

Source:

Duquesnoy, E.; Dinh, N.H.; Castola, V.; Casanova, J., Composition of a Pyrolytic oil from *Cupressus funebris* Endl. of Vietnamese origin, *Flavour Fragr. J.*, 21, 2006, 453-457.



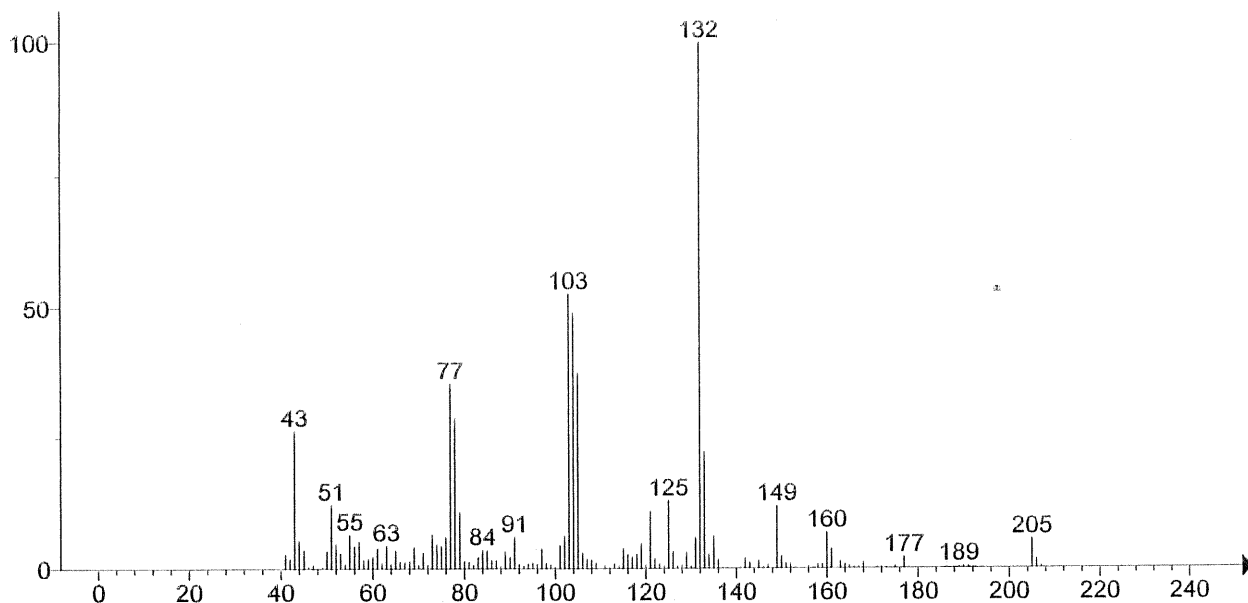

(Text File) +EI Scan (30.978 min) ALI-DRAG-H4-220421-.D

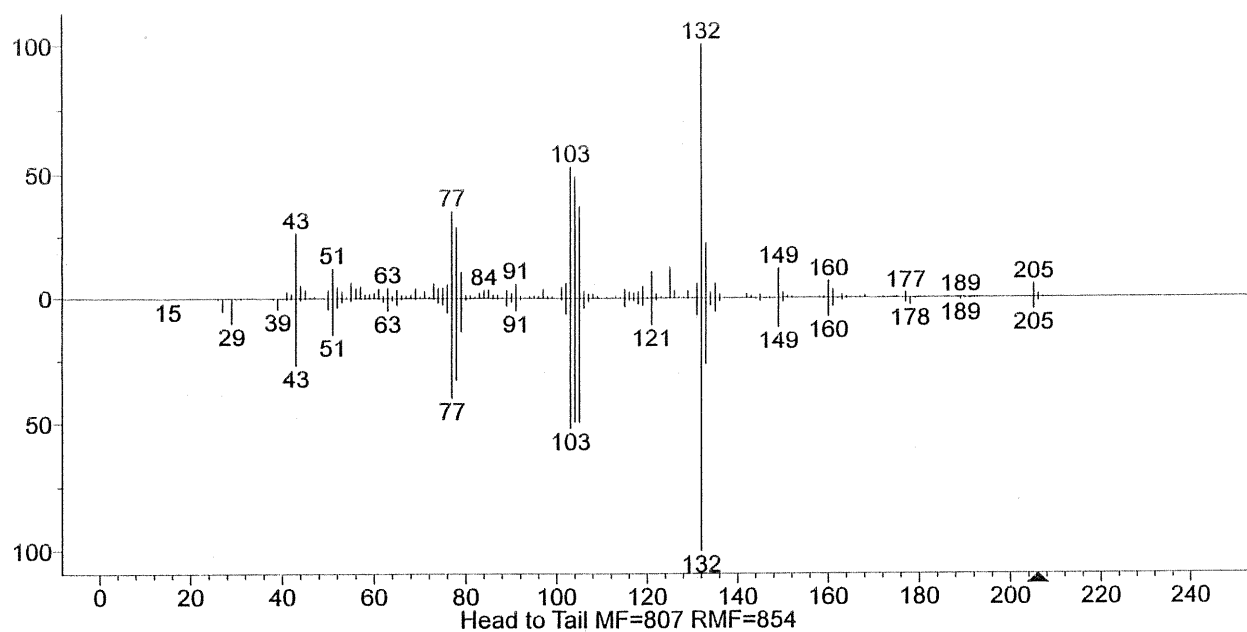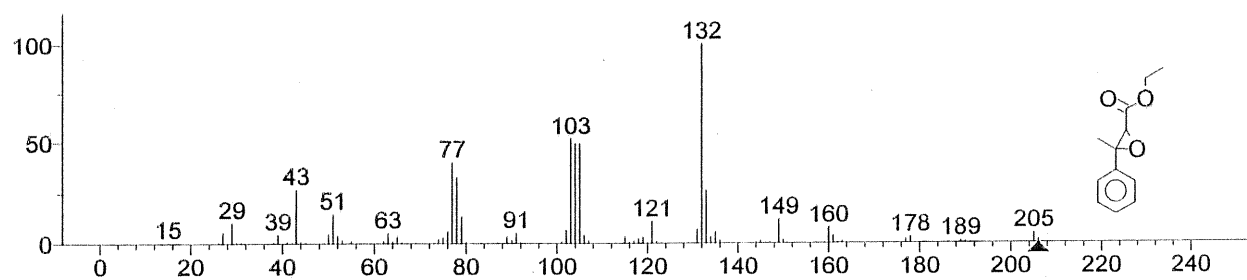

(mainlib) Oxiranecarboxylic acid, 3-methyl-3-phenyl-, ethyl ester, cis-

Name: Oxiranecarboxylic acid, 3-methyl-3-phenyl-, ethyl ester, cis-

Formula:  $C_{12}H_{14}O_3$

MW: 206 CAS#: 19464-95-0 NIST#: 291516 ID#: 93991 DB: mainlib

Other DBs: NIH

Contributor: NIST Mass Spectrometry Data Center, 1998.

10 largest peaks:

132 999 | 103 517 | 105 494 | 104 493 | 77 399 | 78 327 | 43 268 | 133 264 | 51 146 | 79 134 |

Synonyms:

- 1.cis-Ethyl 3-methyl-3-phenylglycidate
- 2.Ethyl-3-methyl-3-phenylglycidate
- 3.Hydrocinnamic acid,  $\alpha,\beta$ -epoxy- $\beta$ -methyl-, ethyl ester, stereoisomer
- 4.cis-3-Methyl-3-phenylglycidic acid, ethyl ester
- 5.Ethyl 3-methyl-3-phenyl-2-oxiranecarboxylate #
- 6.cis-3-Phenyl-3-methylglycidic acid, ethyl ester

Estimated non-polar retention index (n-alkane scale):

Value: 1484 iu

Confidence interval (Diverse functional groups): 89(50%) 382(95%) iu

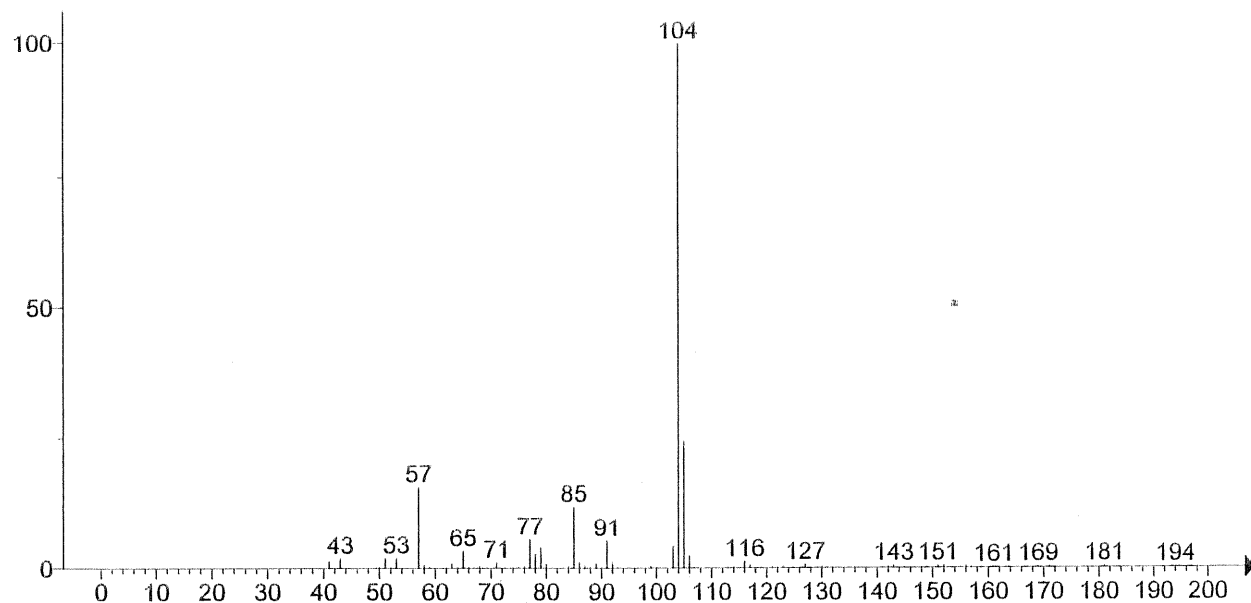

(Text File) +EI Scan (32.738 min) ALI-DRAG-H4-220421-.D Subtract

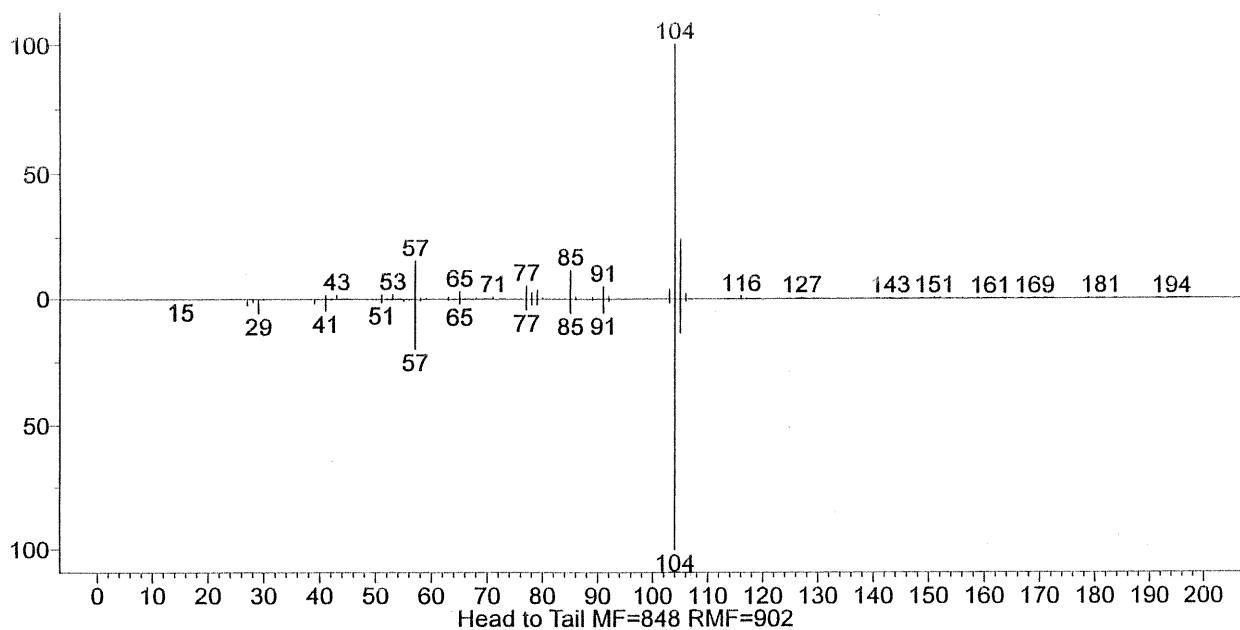

Head to Tail MF=848 RMF=902

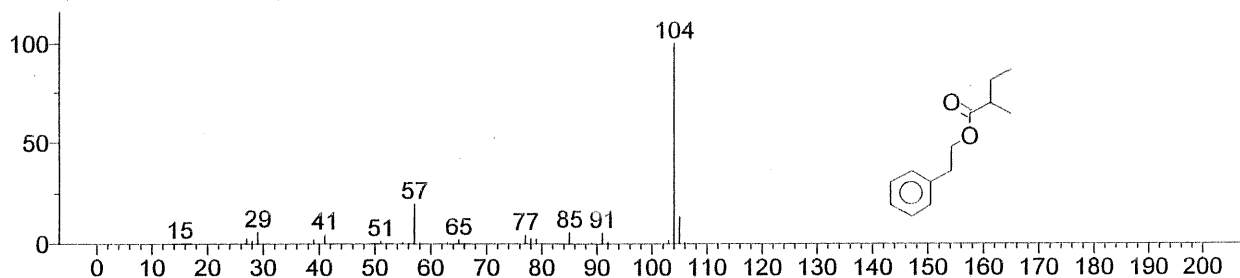

(mainlib) Butanoic acid, 2-methyl-, 2-phenylethyl ester

Name: Butanoic acid, 2-methyl-, 2-phenylethyl ester

Formula: C<sub>13</sub>H<sub>18</sub>O<sub>2</sub>

MW: 206 CAS#: 24817-51-4 NIST#: 118042 ID#: 65225 DB: mainlib

Other DBs: TSCA, RTECS, EINECS

Contributor: Chuck Anderson, Aldrich Chemical Co.

10 largest peaks:

104 999 | 57 197 | 105 135 | 29 57 | 85 56 | 91 55 | 41 47 | 77 43 | 27 26 | 78 25 |

Synonyms:

1. Phenethyl 2-methylbutyrate

2. Phenylethyl 2-methyl butyrate

3. 2-Phenylethyl 2-methylbutanoate #

Estimated non-polar retention index (n-alkane scale):

Value: 1493 iu

Confidence interval (Esters): 47(50%) 201(95%) iu

Retention index.

1. Value: 1460 iu

Column Type: Capillary

Column Class: Standard non-polar

Active Phase: RTX-1

Column

Length: 60 m

Carrier Gas: He

Column Diameter: 0.22 mm

Phase Thickness: 0.25 µm

Data Type: Linear

RI

Program Type: Ramp

Start T: 60 C

End T: 230 C

Heat Rate: 2 K/min

End Time: 35 min

Source: Paolini, J.;

Costa, J.; Bernardini, A., Analysis of the essential oil from aerial parts of *Eupatorium cannabinum* subsp. *corsicum* (L.) by gas chromatography with electron impact and chemical ionization mass spectrometry, J. Chromatogr. A, 1076, 2005, 170-178.

2. Value: 1466 iu

Column Type: Capillary

Column Class: Standard non-polar

Active

Phase: DB-1

Column Length: 30 m

Carrier Gas: He

Phase Thickness: 0.25 µm

Data Type: Normal alkane

RI

Program Type: Ramp

Start T: 50 C

End T: 220 C

Heat Rate: 6 K/min

Start Time: 2 min

End Time: 20

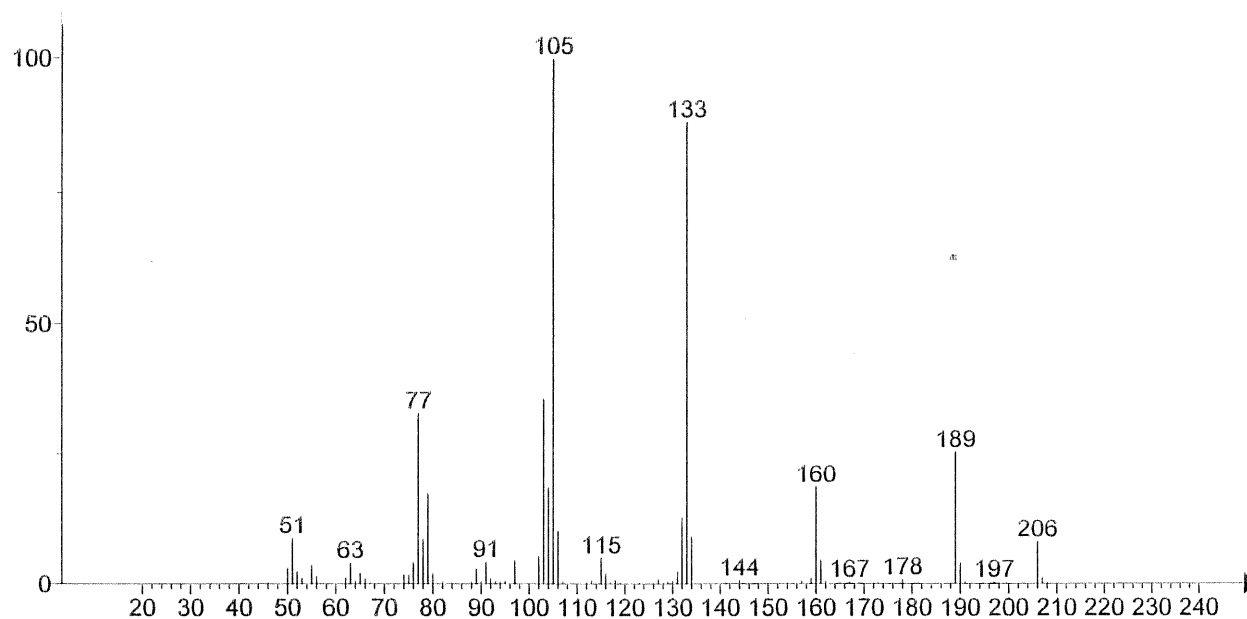

(Text File) +EI Scan (33.038 min) ALI-DRAG-H4-220421-.D Subtract

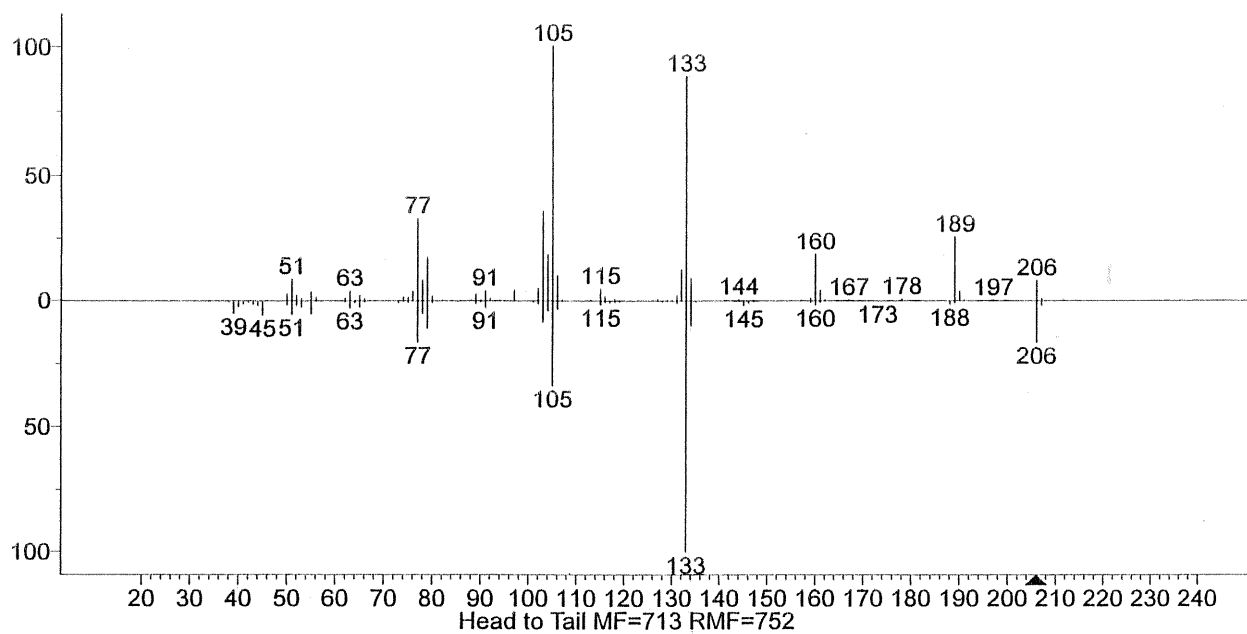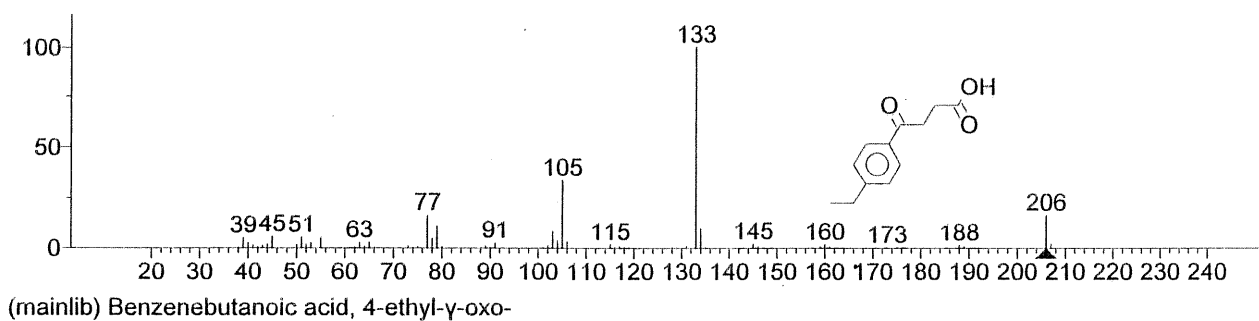

Name: Benzenebutanoic acid, 4-ethyl-γ-oxo-

Formula: C<sub>12</sub>H<sub>14</sub>O<sub>3</sub>

MW: 206 CAS#: 49594-75-4 NIST#: 271880 ID#: 94812 DB: mainlib.

Other DBs: None

Contributor: A.A.Kutin, Moscow, Russia

10 largest peaks:

133 999 | 105 335 | 206 164 | 77 163 | 79 110 | 134 98 | 103 84 | 45 57 | 51 54 | 55 53 |

Synonyms:

1.3-(4-Ethylbenzoyl)propionic acid

2.4-(4-Ethylphenyl)-4-oxobutanoic acid

Estimated non-polar retention index (n-alkane scale):

Value: 1797 iu

Confidence interval (Diverse functional groups): 89(50%) 382(95%) iu

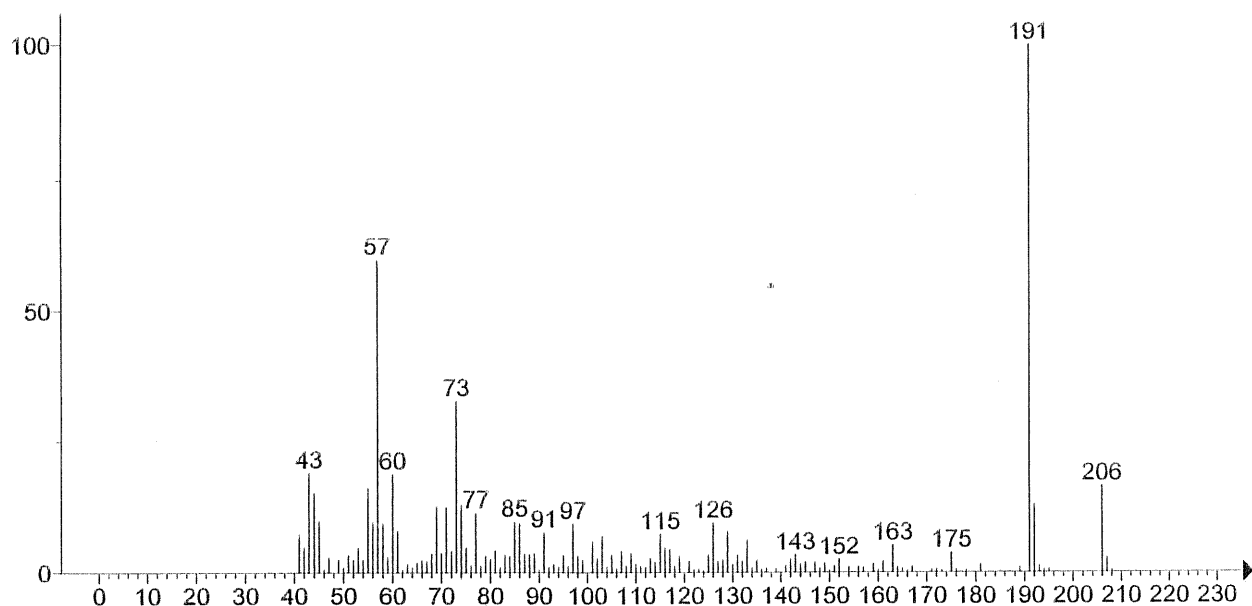

(Text File) +EI Scan (33.266 min) ALI-DRAG-H4-220421-.D

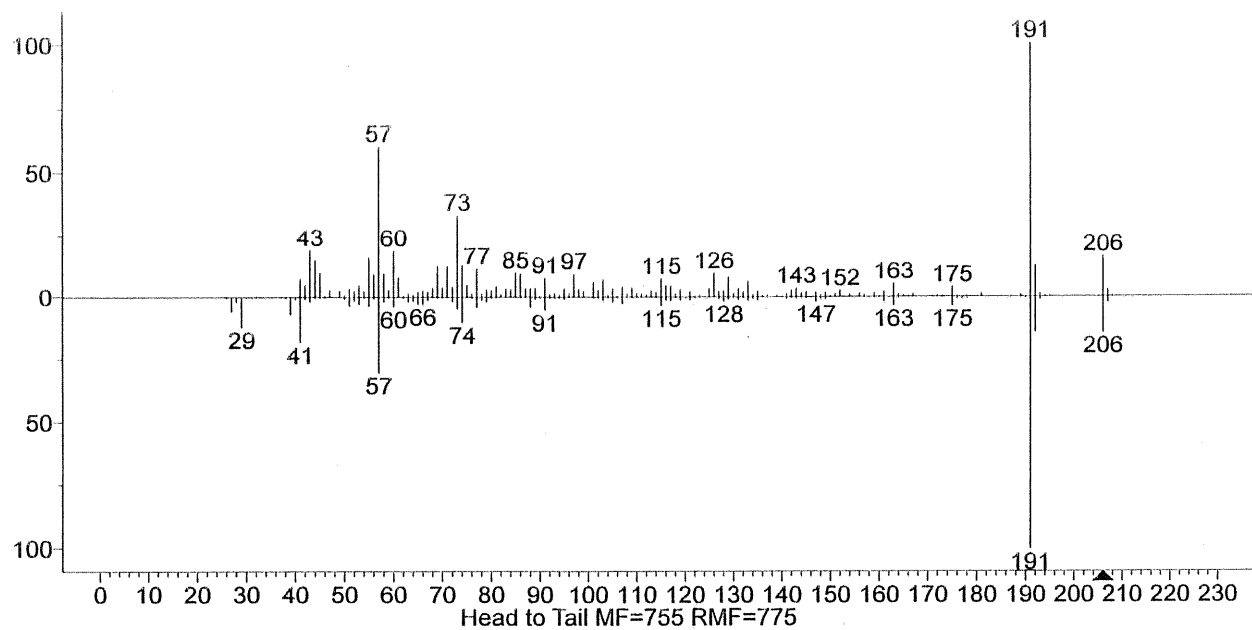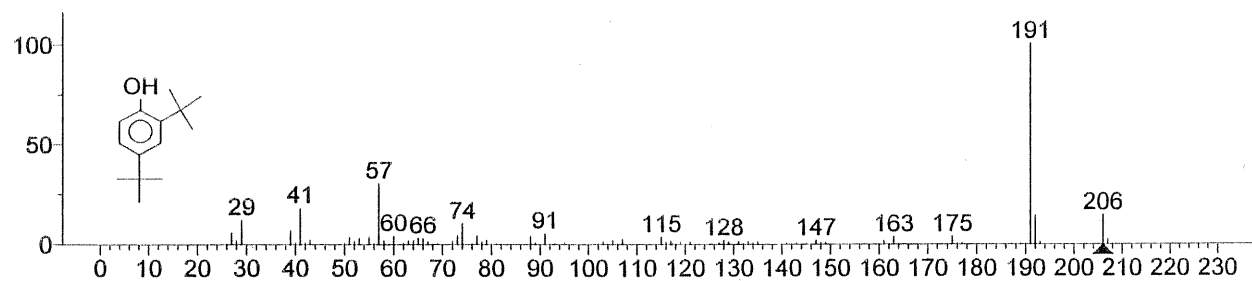

(replib) Phenol, 2,4-bis(1,1-dimethylethyl)-

Name: Phenol, 2,4-bis(1,1-dimethylethyl)-

Formula: C<sub>14</sub>H<sub>22</sub>O

MW: 206 CAS#: 96-76-4 NIST#: 22572 ID#: 23668 DB: replib

Other DBs: Fine, TSCA, RTECS, EPA, HODOC, NIH, EINECS, IRDB

10 largest peaks:

191 999 | 57 302 | 41 181 | 206 145 | 192 143 | 29 121 | 74 102 | 39 71 | 27 58 | 91 53 |

Synonyms:

1. Phenol, 2,4-di-tert-butyl-

2. 2,4-Di-tert-butylphenol

3. 2,4-di-t-Butylphenol

4. 1-Hydroxy-2,4-di-tert-butylbenzene

5. Antioxidant No. 33

6. Prodox 146

7. Prodox 146A-85X

8. 2,4-Bis(1,1-dimethylethyl)phenol

Estimated non-polar retention index (n-alkane scale):

Value: 1555 iu

Confidence interval (Phenols): 70(50%) 301(95%) iu

Retention index.

1. Value: 1539 iu

Column Type: Packed

Column Class: Standard non-polar

Active Phase: SE-30

Column

Length: 2 m

Substrate: GasChrom Q

Data Type: Linear RI

Program Type: Ramp

Start T: 80 C

End T: 250

C

Heat Rate: 4 K/min

Source: Staniewski, J., Gas chromatographic analysis of some hydroxyoxime extractants of metals, Chem. Anal. (Warsaw), 36(2), 1991, 325-333.

2. Value: 1519 iu

Column Type: Packed

Column Class:

Standard non-polar

Active Phase: SE-30

Column Length: 3 m

Carrier Gas: He

Substrate: N\_AW\_HMDS

Data

Type: Kovats RI

Program Type: Isothermal

Start T: 523 K

Source: Verevkin, S.P.; Nesterov, O.A.; Rempel, P.D.;

Synkova, N.V.; Shashkin, N.P., Chromatographic determination of the products of condensation of alkylphenols with formic aldehyde, Zh. Anal. Khim., 43, 1990, 760-761.

<...>



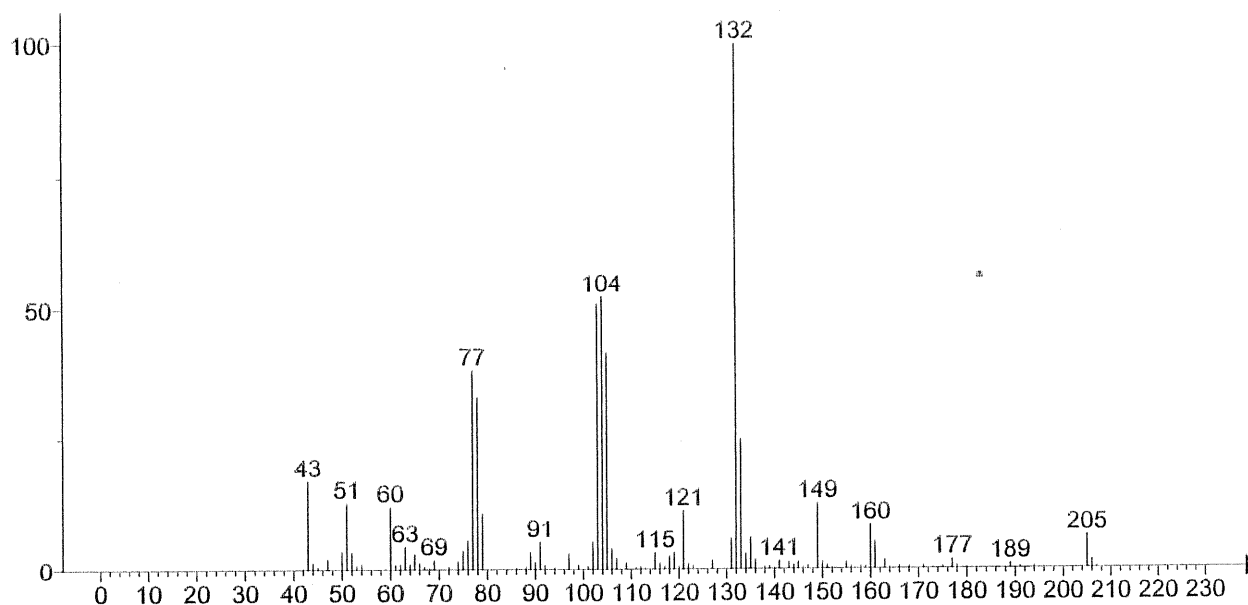

(Text File) +EI Scan (33.854 min) ALI-DRAG-H4-220421-.D Subtract

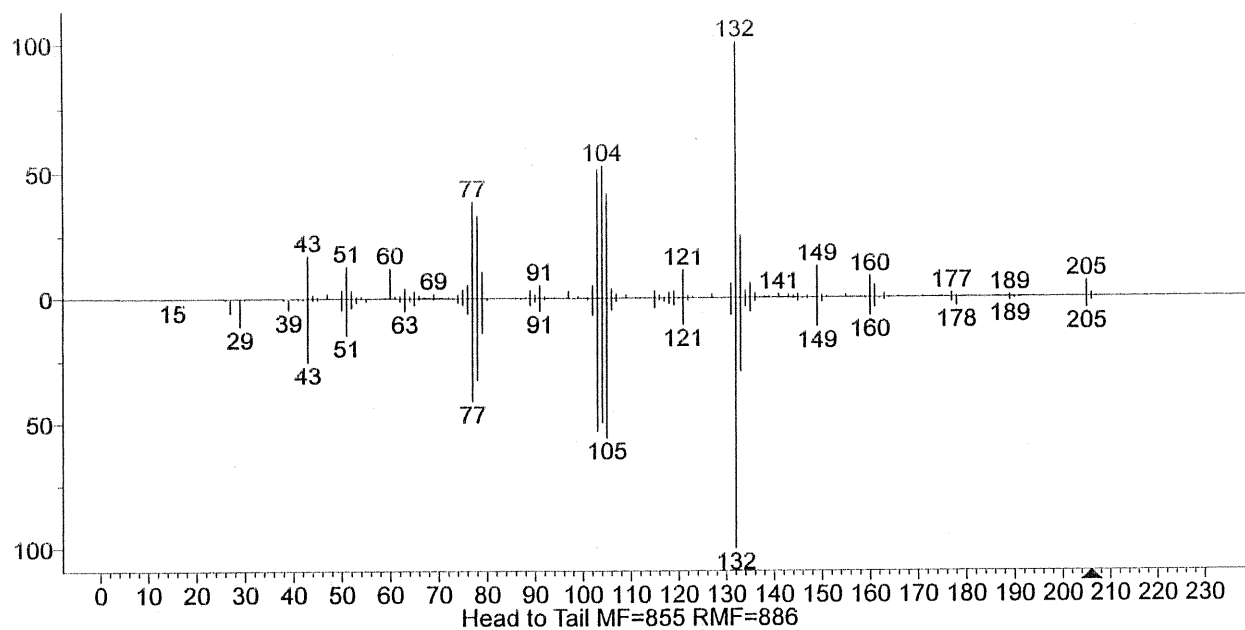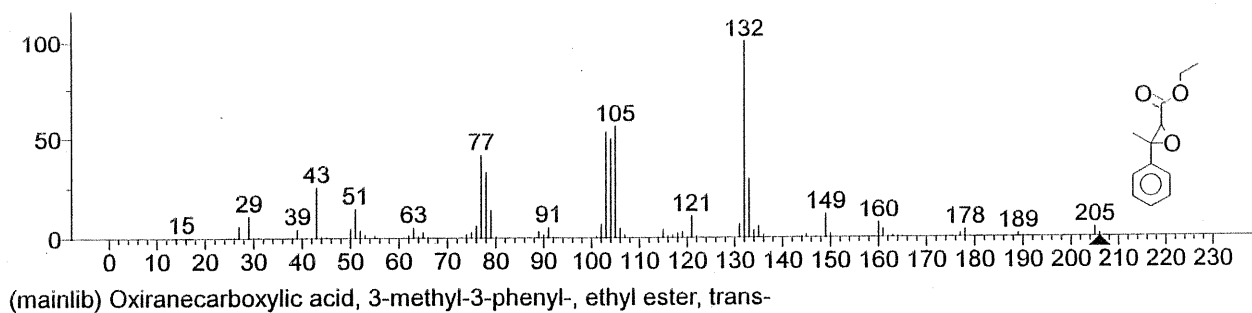

(mainlib) Oxiranecarboxylic acid, 3-methyl-3-phenyl-, ethyl ester, trans-

Name: Oxiranecarboxylic acid, 3-methyl-3-phenyl-, ethyl ester, trans-

Formula: C<sub>12</sub>H<sub>14</sub>O<sub>3</sub>

MW: 206 CAS#: 19464-92-7 NIST#: 291517 ID#: 94061 DB: mainlib

Other DBs: None

Contributor: NIST Mass Spectrometry Data Center, 1998.

10 largest peaks:

132 999 | 105 557 | 103 531 | 104 496 | 77 413 | 78 327 | 133 293 | 43 253 | 51 145 | 79 138 |

Synonyms:

- 1.trans-Ethyl 3-Methyl-3-phenylglycidate
- 2.Hydrocinnamic acid,  $\alpha,\beta$ -epoxy- $\beta$ -methyl-, ethyl ester, trans-
- 3.Hydrocinnamic acid,  $\alpha,\beta$ -epoxy- $\beta$ -methyl-, ethyl ester, stereoisomer
- 4.trans-3-Methyl-3-phenylglycidic acid, ethyl ester
- 5.Ethyl 3-methyl-3-phenyl-2-oxiranecarboxylate #
- 6.trans-3-Phenyl-3-methylglycidic acid, ethyl ester

Estimated non-polar retention index (n-alkane scale):

Value: 1484 iu

Confidence interval (Diverse functional groups): 89(50%) 382(95%) iu

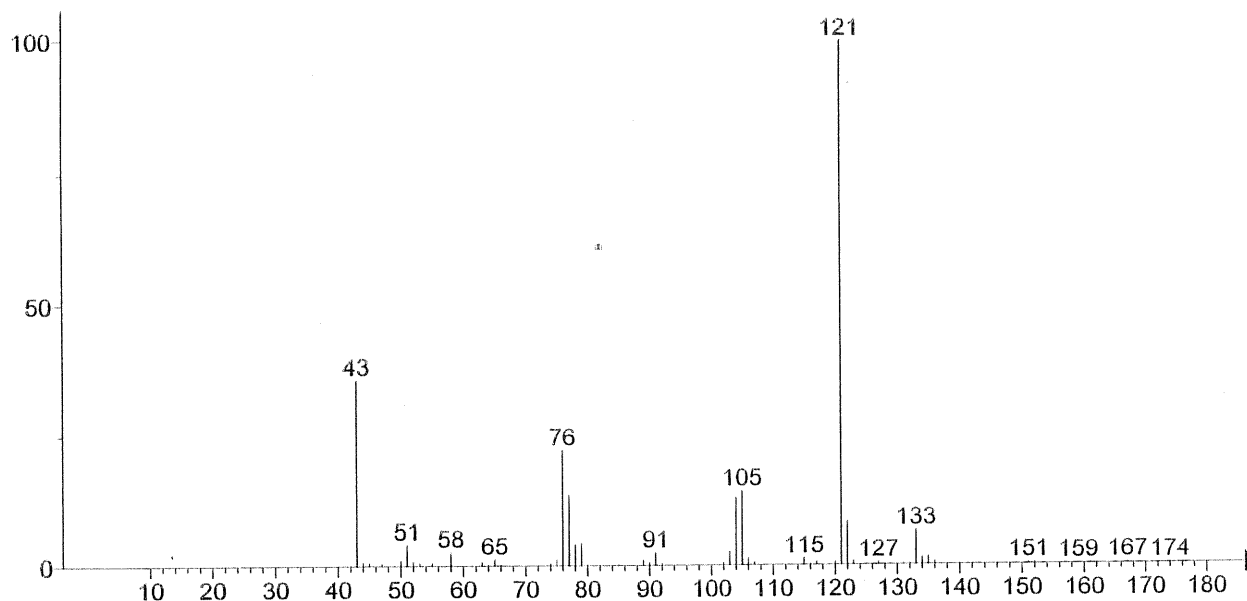

(Text File) +EI Scan (35.133 min) ALI-DRAG-H4-220421-.D Subtract

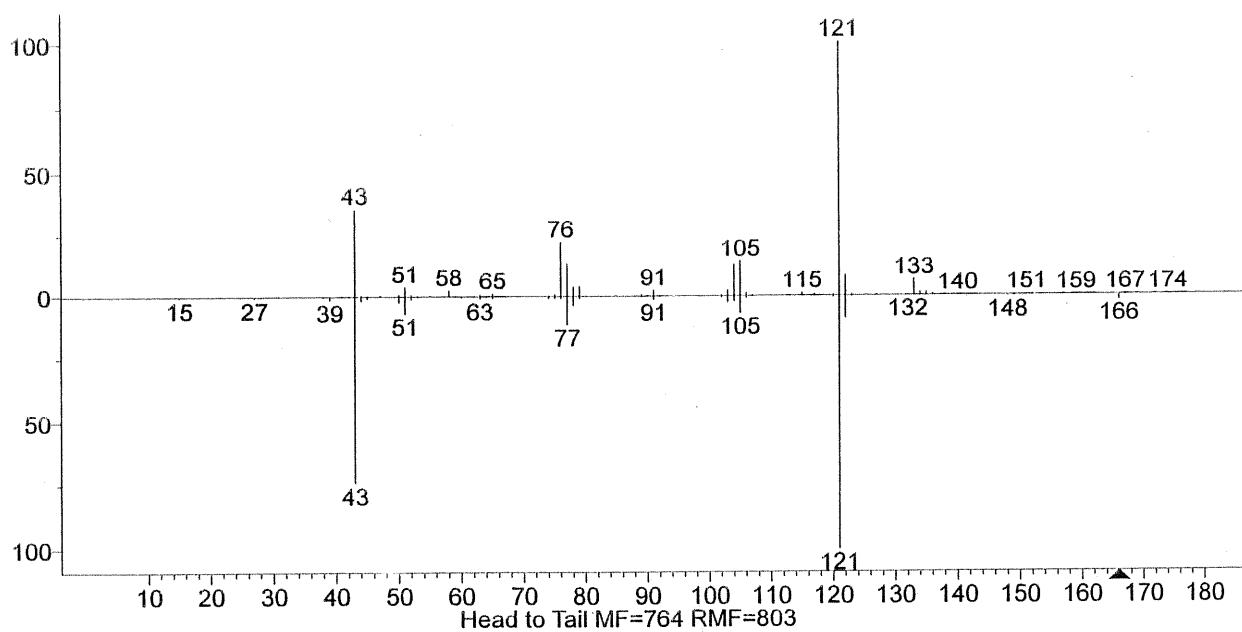

Head to Tail MF=764 RMF=803

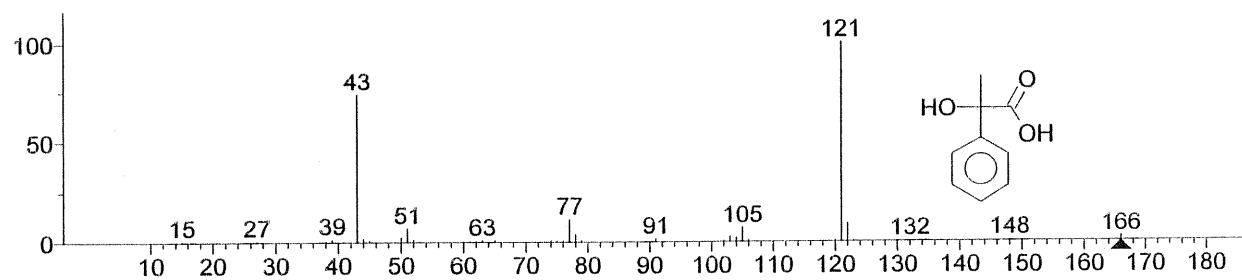

(mainlib) Benzeneacetic acid,  $\alpha$ -hydroxy- $\alpha$ -methyl-, ( $\pm$ )-

41  
Name: Benzeneacetic acid,  $\alpha$ -hydroxy- $\alpha$ -methyl-, ( $\pm$ )-

Formula:  $C_9H_{10}O_3$

MW: 166 CAS#: 4607-38-9 NIST#: 244949 ID#: 82980 DB: mainlib

Other DBs: TSCA, HODOC, NIH, EINECS

Contributor: Japan AIST/NIMC Database- Spectrum MS-IW-5150

10 largest peaks:

121 999 | 43 738 | 77 114 | 122 91 | 105 70 | 51 69 | 78 37 | 103 26 | 50 23 | 104 22 |

Synonyms:

1.DL- $\alpha$ -Phenyllactic acid

2.DL-Atrolactic acid

3.Mandelic acid,  $\alpha$ -methyl-, DL-

4.Benzeneacetic acid,  $\alpha$ -hydroxy- $\alpha$ -methyl-, (.+.-)-

5.2-Hydroxy-2-phenylpropanoic acid #

Estimated non-polar retention index (n-alkane scale):

Value: 1441 iu

Confidence interval (Diverse functional groups): 89(50%) 382(95%) iu

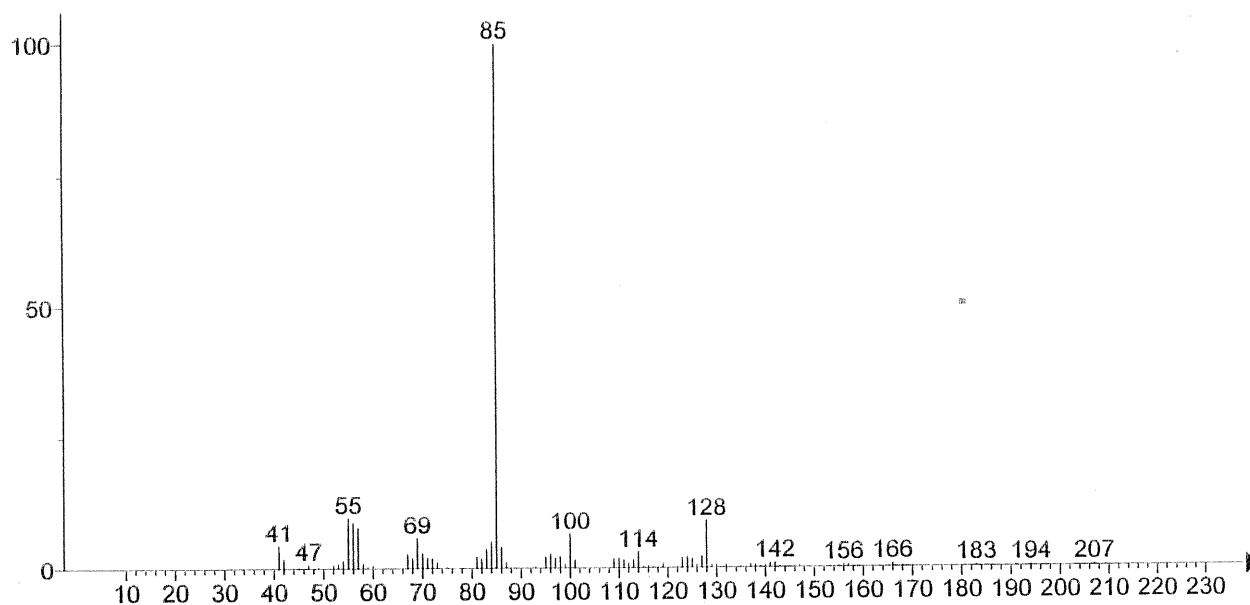

(Text File) +EI Scan (35.226 min) ALI-DRAG-H4-220421-.D Subtract

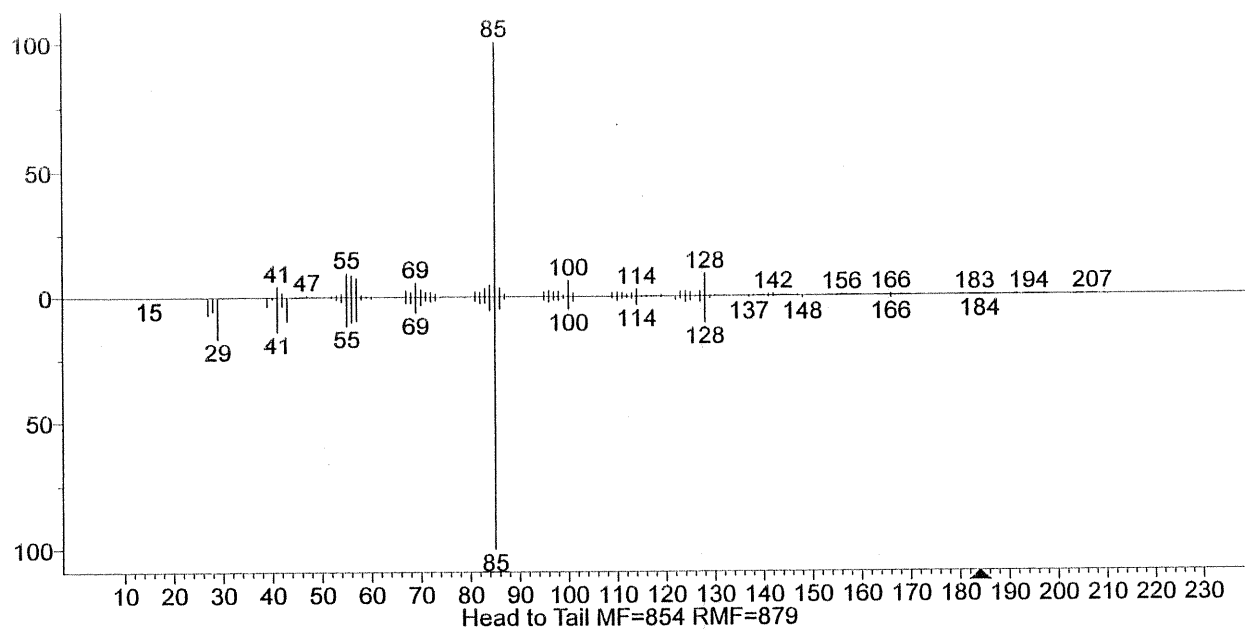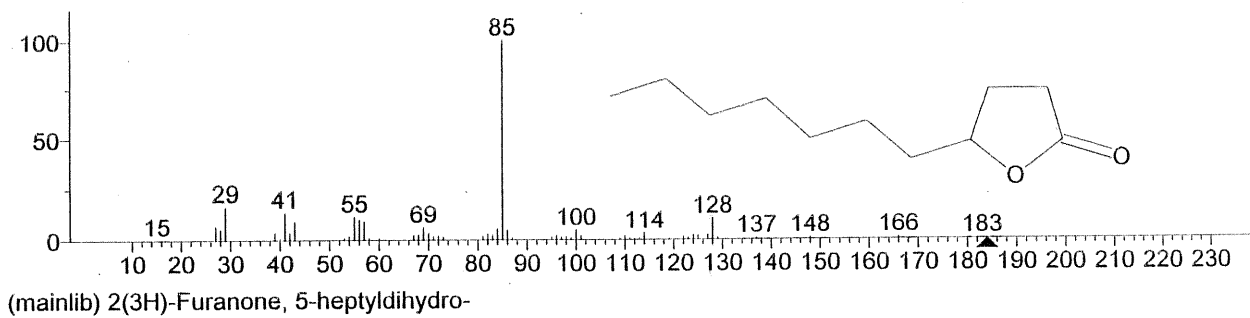

(mainlib) 2(3H)-Furanone, 5-heptyldihydro-

Name: 2(3H)-Furanone, 5-heptyldihydro-

Formula: C<sub>11</sub>H<sub>20</sub>O<sub>2</sub>

MW: 184 CAS#: 104-67-6 NIST#: 7793 ID#: 46596 DB: mainlib

Other DBs: Fine, TSCA, RTECS, HODOC, NIH, EINECS

10 largest peaks:

85 999 | 29 165 | 41 137 | 55 115 | 128 104 | 56 100 | 43 94 | 57 93 | 27 70 | 69 62 |

Synonyms:

1. δ-Undecalactone
2. γ-n-Heptylbutyrolactone
3. γ-Heptyl-γ-butyrolactone
4. γ-Heptylbutyrolactone
5. γ-Undecalactone
6. γ-Undecanolactone
7. γ-Undecanolide
8. Peach lactone
9. Persicol
10. Undecanoic acid, 4-hydroxy-, γ-lactone
11. 4-Hydroxyundecanoic acid lactone
12. Undecanoic γ-lactone
13. Undecanolide-1,4
14. γ-Undecalatone
15. Aldehyde C-14
16. Aldehyde C-14 peach
17. Peach aldehyde
18. 1,4-Undecanolide
19. 4-Hydroxyundecanoic acid, γ-lactone
20. 4-Undecanolide
21. γ-Undekalakton
22. 5-Heptyldihydro-2(3H)-furanone #

Estimated non-polar retention index (n-alkane scale):

Value: 1483 iu

Confidence interval (Esters): 47(50%) 201(95%) iu

Retention index.

1. Value: 1521.0 iu

Column Type: Capillary

Column Class: Standard non-polar

Active Phase: DB-1

Column

Length: 30 m

Carrier Gas: He

Column Diameter: 0.25 mm

Phase Thickness: 0.25 μm

Data Type: Linear

RI

Program Type: Ramp

Start T: 40 C

End T: 325 C

Heat Rate: 3 K/min

Source: Sun, G.; Strempel, P.,

Retention index characterization of flavor, fragrance, and many other compounds on DB-1 and DB-XLB, 2003.

2.

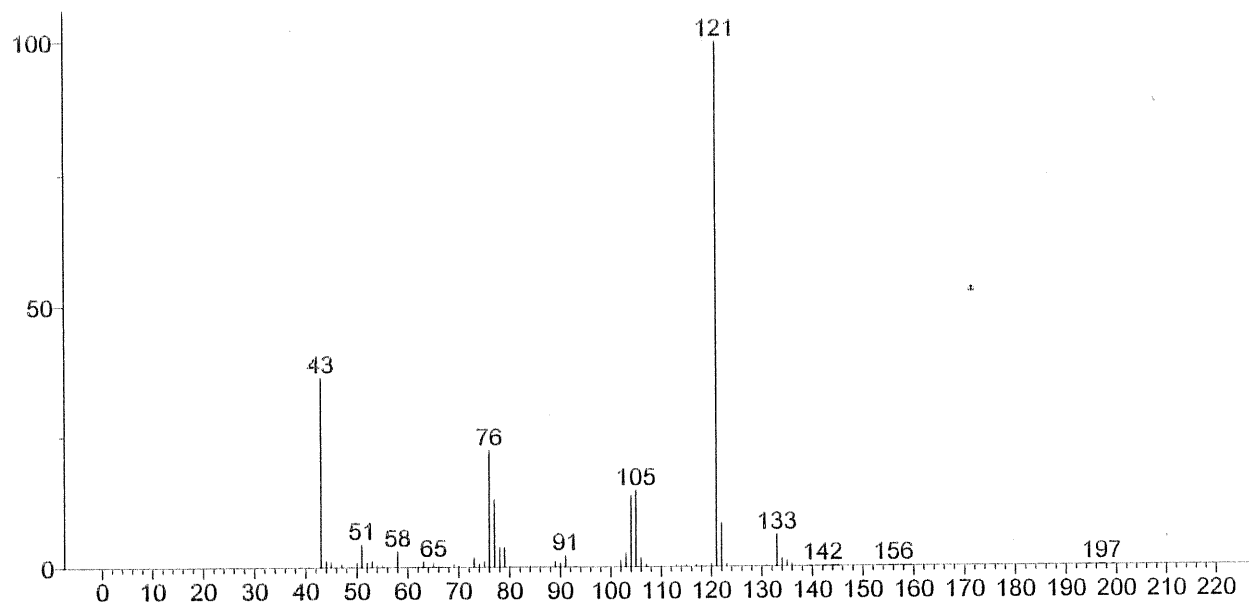

(Text File) +EI Scan (35.878 min) ALI-DRAG-H4-220421-.D Subtract

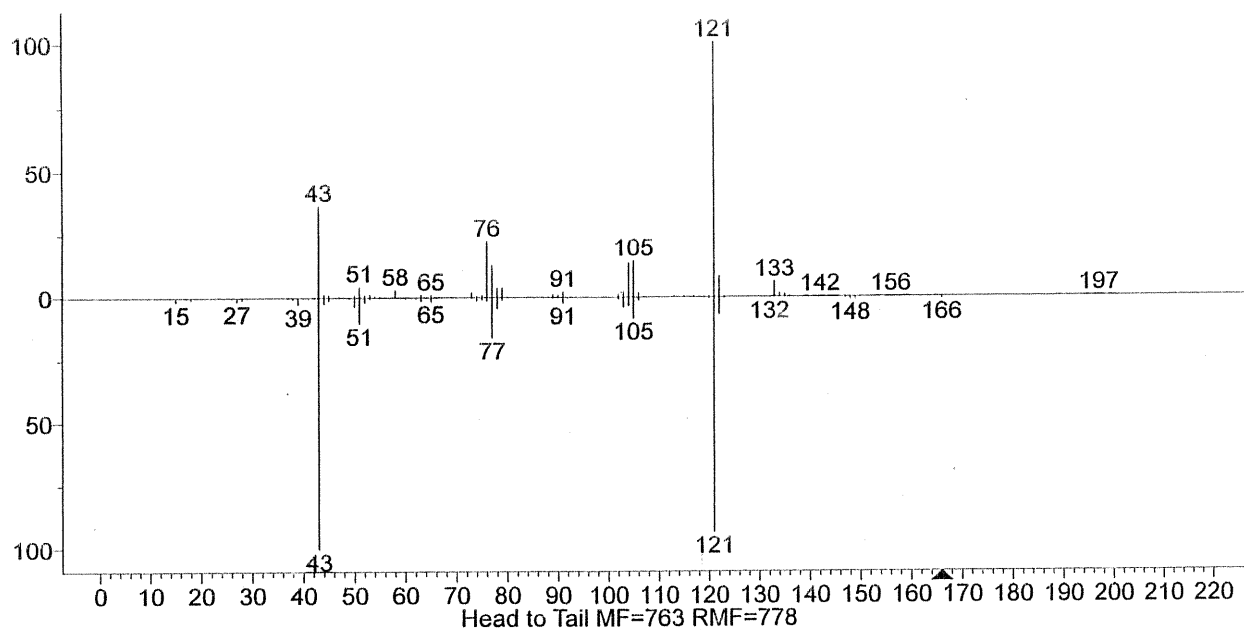

Head to Tail MF=763 RMF=778

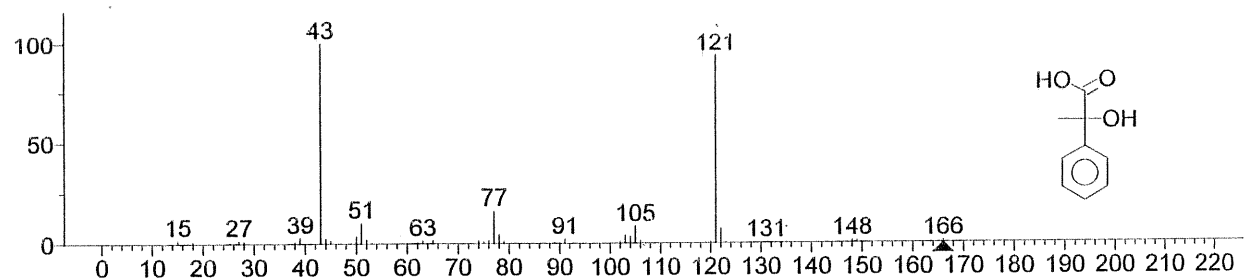

(mainlib) Benzeneacetic acid,  $\alpha$ -hydroxy- $\alpha$ -methyl-

Name: Benzeneacetic acid,  $\alpha$ -hydroxy- $\alpha$ -methyl-

Formula:  $C_9H_{10}O_3$

MW: 166 CAS#: 515-30-0 NIST#: 234792 ID#: 10592 DB: mainlib

Other DBs: Fine, TSCA, HODOC, NIH, EINECS

Contributor: Japan AIST/NIMC Database- Spectrum MS-NW-7445

10 largest peaks:

43 999 | 121 932 | 77 160 | 51 102 | 105 83 | 122 70 | 78 45 | 103 40 | 50 36 | 104 34 |

Synonyms:

1. Mandelic acid,  $\alpha$ -methyl-
2.  $\alpha$ -Hydroxy- $\alpha$ -phenylpropionic acid
3.  $\alpha$ -Phenyllactic acid
4. Atrolactic acid
5. 2-Hydroxy-2-phenylpropionic acid
6. 2-Phenyl-2-hydroxypropionic acid
7. 2-Phenyllactic acid
8. dl-Atrolactic acid
9. 2-Hydroxy-2-phenylpropanoic acid #

Estimated non-polar retention index (n-alkane scale):

Value: 1441 iu

Confidence interval (Diverse functional groups): 89(50%) 382(95%) iu



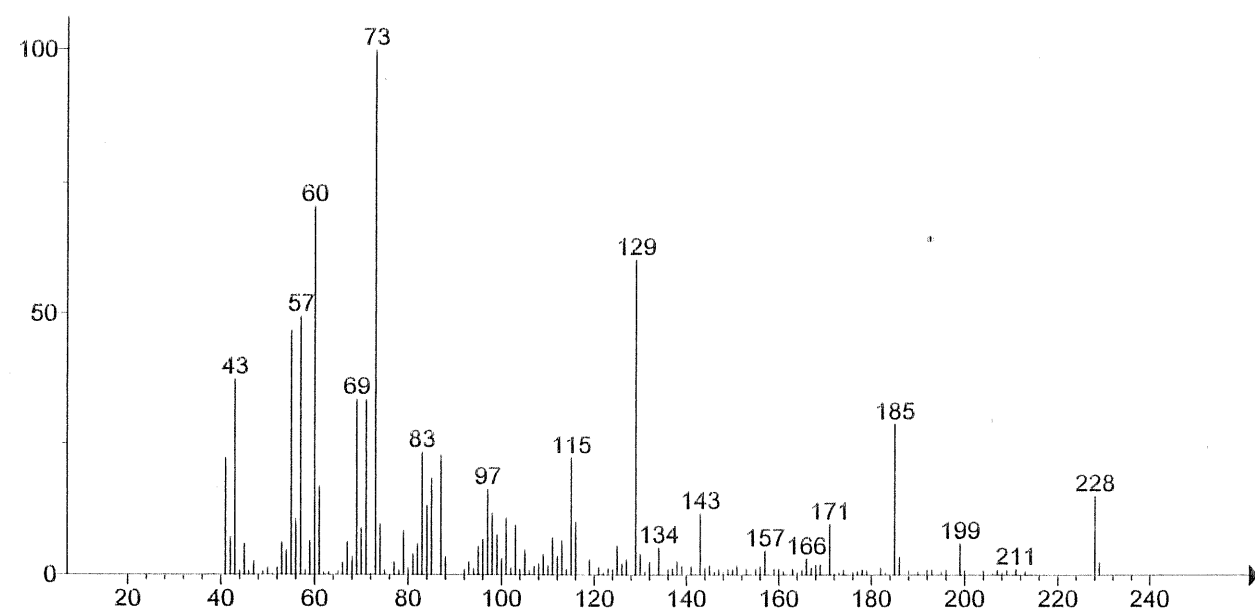

(Text File) +EI Scan (40.258 min) ALI-DRAG-H4-220421-.D Subtract

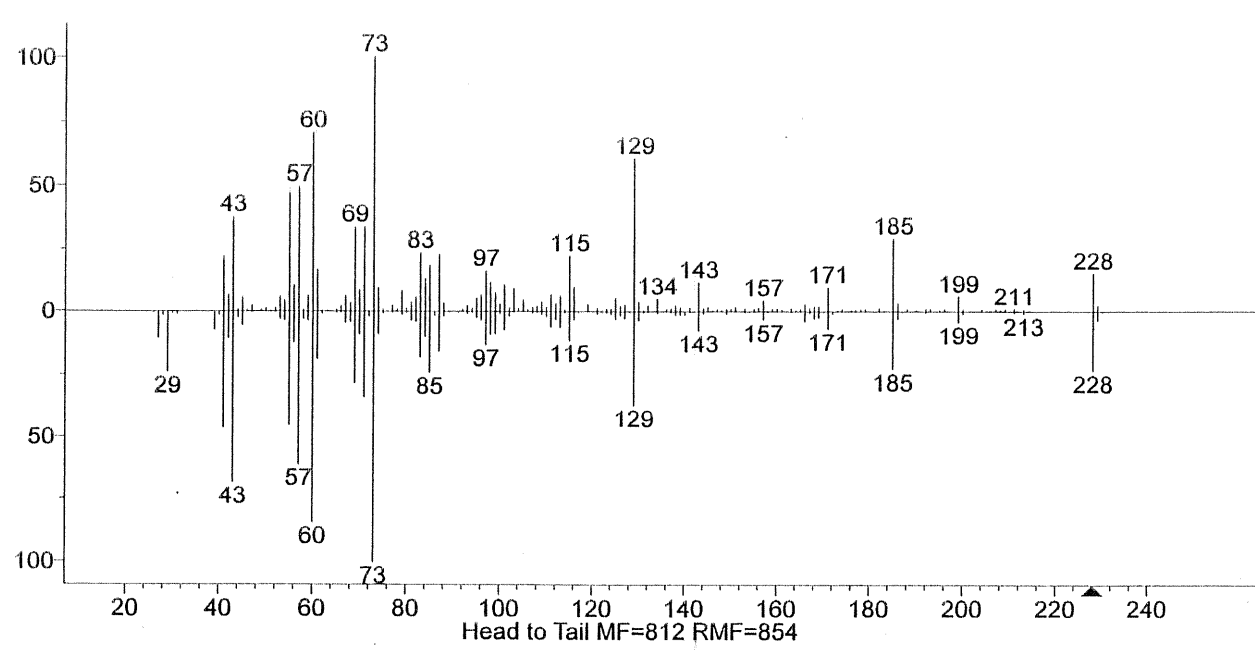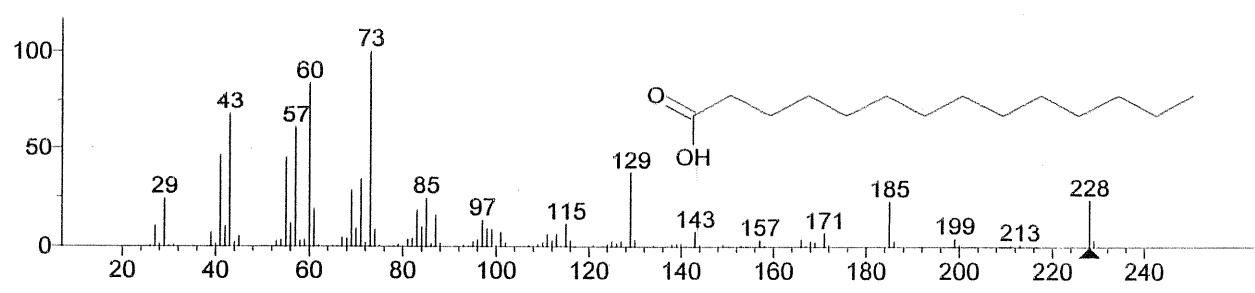

(replib) Tetradecanoic acid

Name: Tetradecanoic acid

Formula: C<sub>14</sub>H<sub>28</sub>O<sub>2</sub>

MW: 228 CAS#: 544-63-8 NIST#: 189107 ID#: 8471 DB: replib

Other DBs: Fine, TSCA, RTECS, EPA, HODOC, NIH, EINECS, IRDB

Contributor: Chemical Concepts

10 largest peaks:

73 999 | 60 841 | 43 681 | 57 609 | 41 461 | 55 451 | 129 371 | 71 338 | 69 282 | 85 241 |

Synonyms:

1. Myristic acid
2. n-Tetradecanoic acid
3. n-Tetradecoic acid
4. Neo-Fat 14
5. Univol U 316S
6. 1-Tridecanecarboxylic acid
7. Coconut oil fatty acids
8. Crodacid
9. Emery 655
10. Hydrofol acid 1495
11. Hystrene 9014
12. n-Tetradecan-1-oic acid
13. Emery 654
14. Hystrene 9514
15. Philacid 1400
16. Prifac 2940
17. Prifrac 2940
18. Univol U 3165
19. Univol U320

Estimated non-polar retention index (n-alkane scale):

Value: 1769 iu

Confidence interval (Carboxylic acids): 51(50%) 220(95%) iu

Retention index.

1. Value: 1748 iu

Column Type: Capillary

Column Class: Standard non-polar

Active Phase: RTX-1

Column

Length: 60 m

Carrier Gas: He

Column Diameter: 0.22 mm

Phase Thickness: 0.25 um

Data Type: Linear

RI

Program Type: Ramp

Start T: 60 C

End T: 230 C

Heat Rate: 2 K/min

End Time: 35 min

Source: Paolini, J.;

Muselli, A.; Bernardini, A.-F.; Bighelli, A.; Casanova, J.; Costa, J., Thymol derivatives from essential oil of *Doronicum corsicum* L., *Flavour Fragr. J.*, 22, 2007, 479-487.

2. Value: 1772 iu

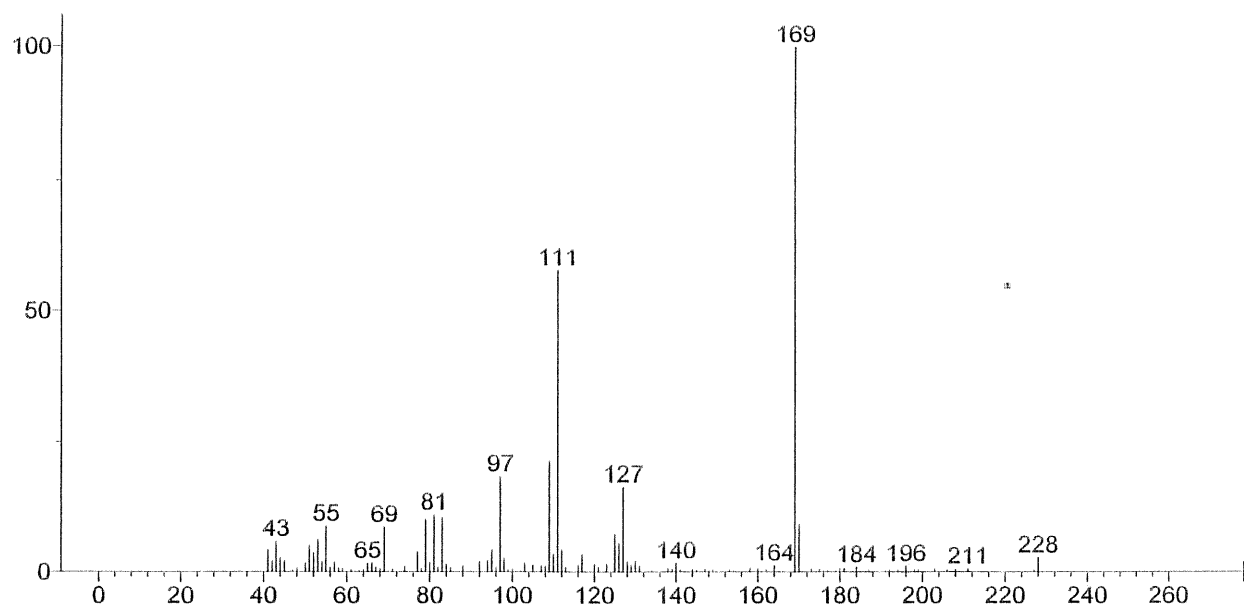

(Text File) +EI Scan (42.771 min) ALI-DRAG-H4-220421-.D Subtract

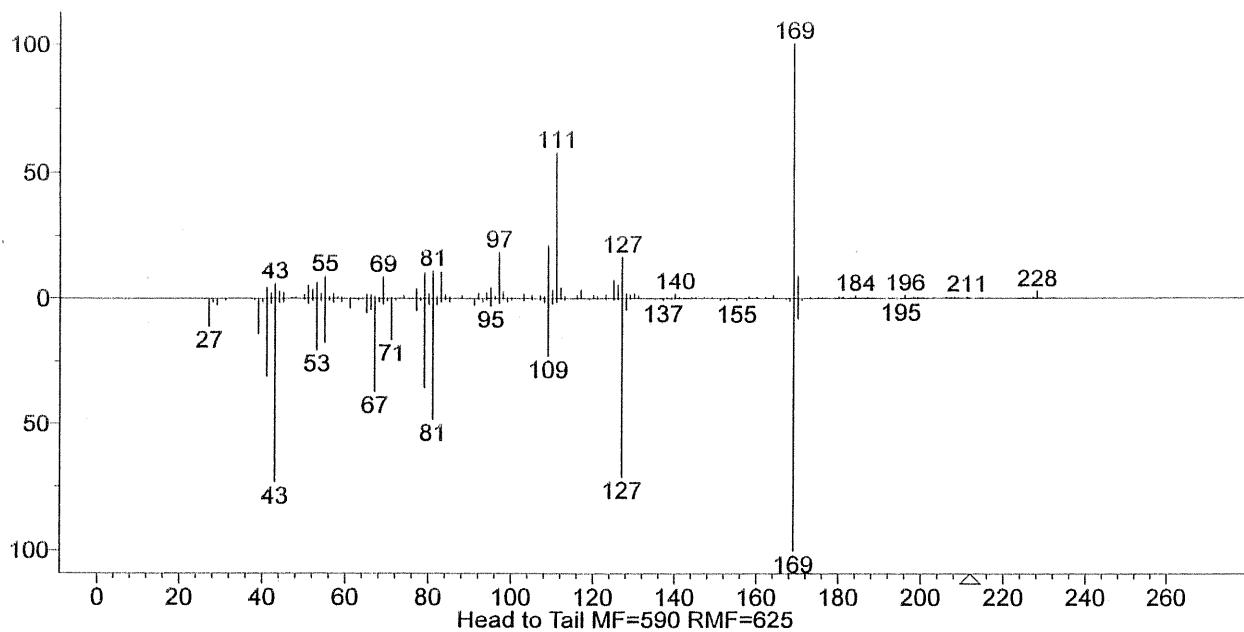

Head to Tail MF=590 RMF=625

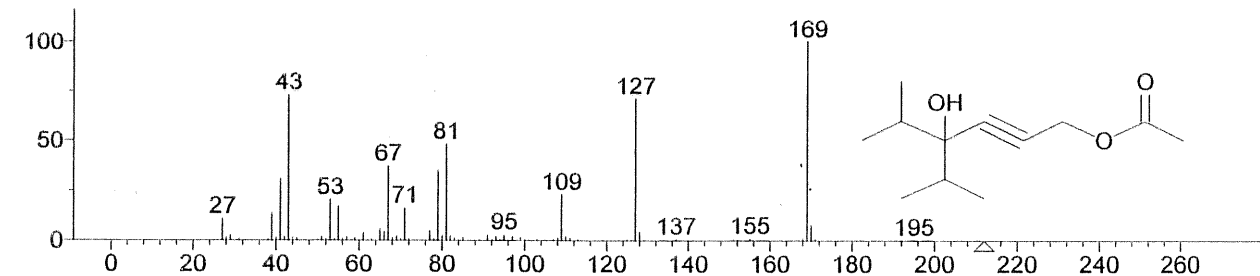

(mainlib) Acetate, [4-hydroxy-4-(1-methylethyl)-5-methyl-2-hexynyl] ester

Name: Acetate, [4-hydroxy-4-(1-methylethyl)-5-methyl-2-hexynyl] ester

Formula:  $C_{12}H_{20}O_3$

MW: 212 CAS#: 70372-90-6 NIST#: 196753 ID#: 125443 DB: mainlib

Other DBs: None

Contributor: Chemical Concepts

10 largest peaks:

169 999 | 43 730 | 127 709 | 81 481 | 67 370 | 79 355 | 41 307 | 109 229 | 53 203 | 55 174 |

Synonyms:

1.4-Hydroxy-4-isopropyl-5-methyl-2-hexynyl acetate #

Estimated non-polar retention index (n-alkane scale):

Value: 1362 iu

Confidence interval (Diverse functional groups): 89(50%) 382(95%) iu

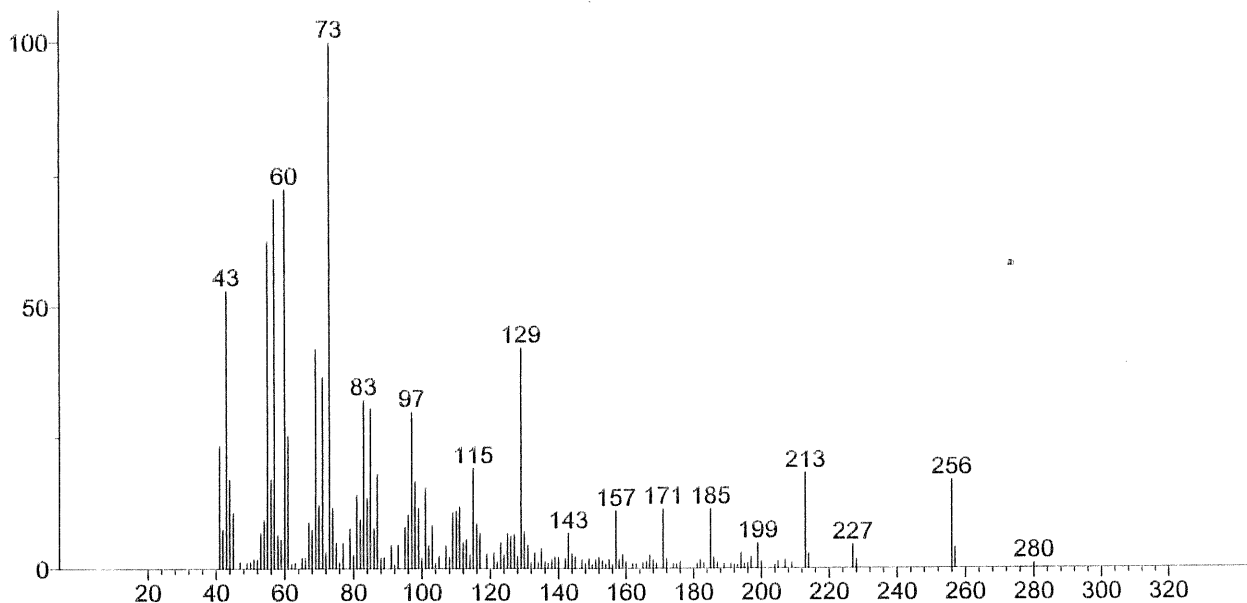

(Text File) +EI Scan (47.657 min) ALI-DRAG-H4-220421-.D

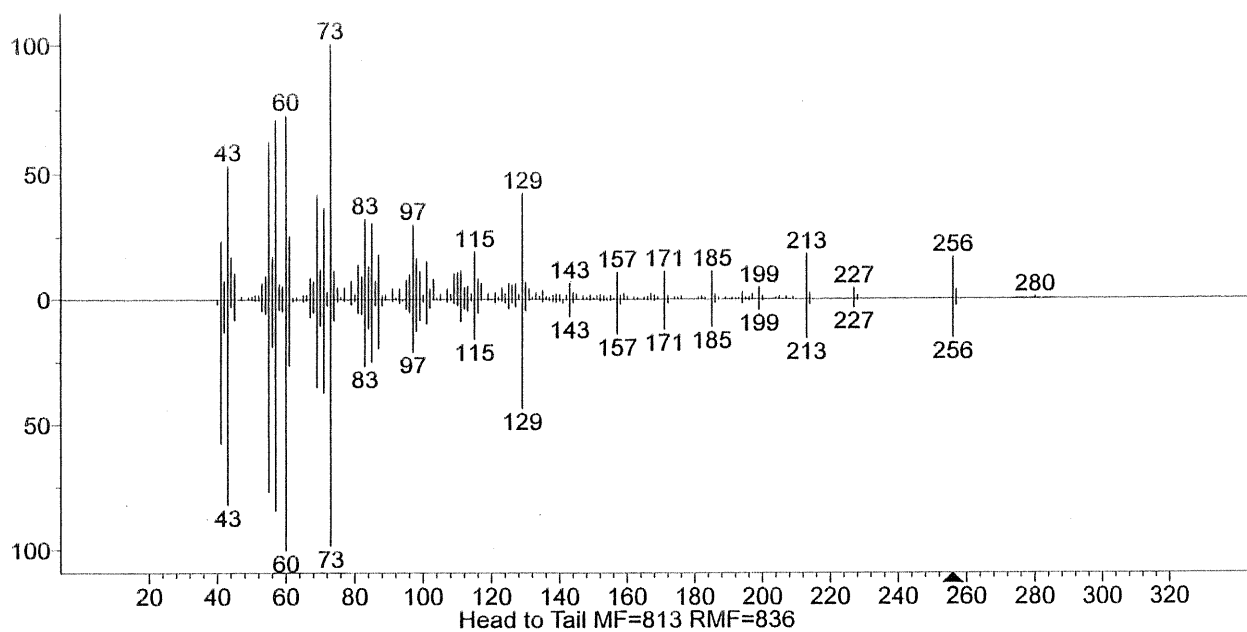

Head to Tail MF=813 RMF=836

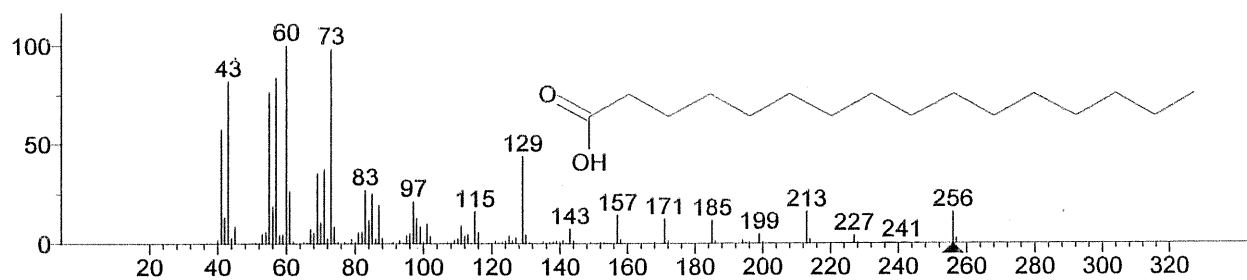

(replib) n-Hexadecanoic acid

Name: n-Hexadecanoic acid

Formula:  $C_{16}H_{32}O_2$

MW: 256 CAS#: 57-10-3 NIST#: 335494 ID#: 6723 DB: replib

Other DBs: Fine, TSCA, RTECS, EPA, HODOC, NIH, EINECS, IRDB

Contributor: Drug Lab

10 largest peaks:

60 999 | 73 980 | 57 840 | 43 817 | 55 767 | 41 574 | 129 435 | 71 373 | 69 351 | 83 267 |

Synonyms:

- 1.Hexadecanoic acid
- 2.n-Hexadecoic acid
- 3.Palmitic acid
- 4.Pentadecanecarboxylic acid
- 5.1-Pentadecanecarboxylic acid
- 6.Cetylic acid
- 7.Emersol 140
- 8.Emersol 143
- 9.Hexadecylic acid
- 10.Hydrofol
- 11.Hystrene 8016
- 12.Hystrene 9016
- 13.Industrene 4516
- 14.Prifrac 2960
- 15.Glycon P-45
- 16.Prifac 2960
- 17.Univol U332

Estimated non-polar retention index (n-alkane scale):

Value: 1968 iu

Confidence interval (Carboxylic acids): 51(50%) 220(95%) iu

Retention index.

1. Value: 1942 iu

Column Type: Capillary

Column Class: Standard non-polar

Active Phase: RTX-1

Column

Length: 60 m

Carrier Gas: He

Column Diameter: 0.22 mm

Phase Thickness: 0.25  $\mu$ m

Data Type: Linear

RI

Program Type: Ramp

Start T: 60 C

End T: 230 C

Heat Rate: 2 K/min

End Time: 35 min

Source: Paolini, J.;

Muselli, A.; Bernardini, A.-F.; Bighelli, A.; Casanova, J.; Costa, J., Thymol derivatives from essential oil of *Doronicum corsicum* L., *Flavour Fragr. J.*, 22, 2007, 479-487.

2. Value: 1972 iu

Column Type: Capillary

Column

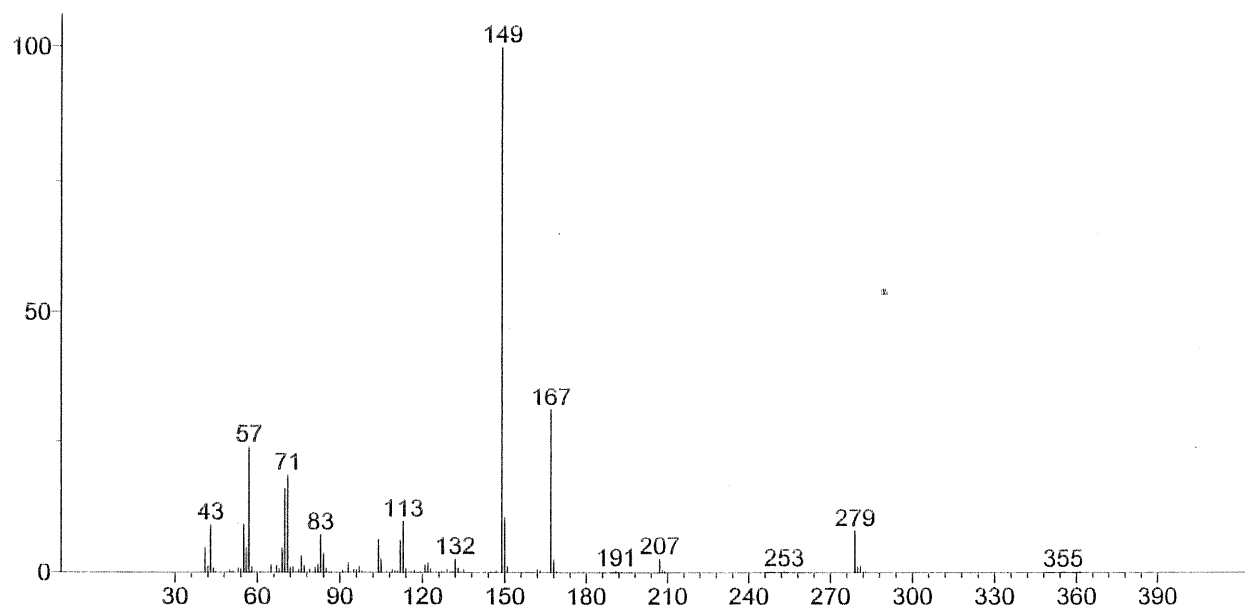

(Text File) +EI Scan (76.665 min) ALI-DRAG-H4-220421-.D

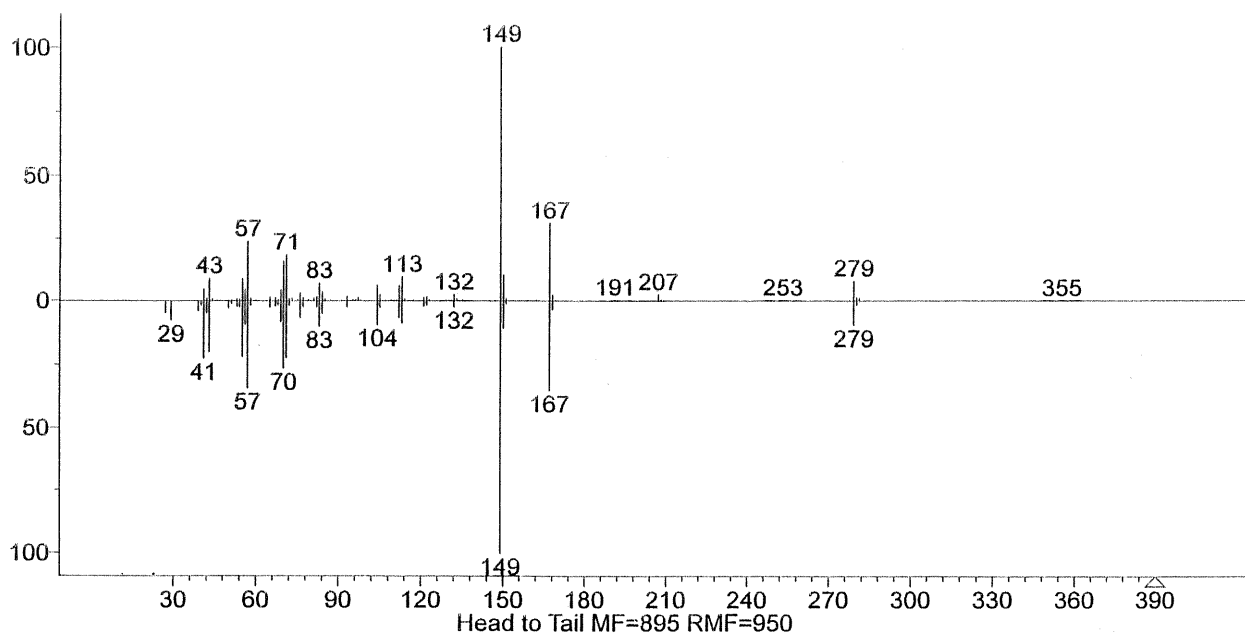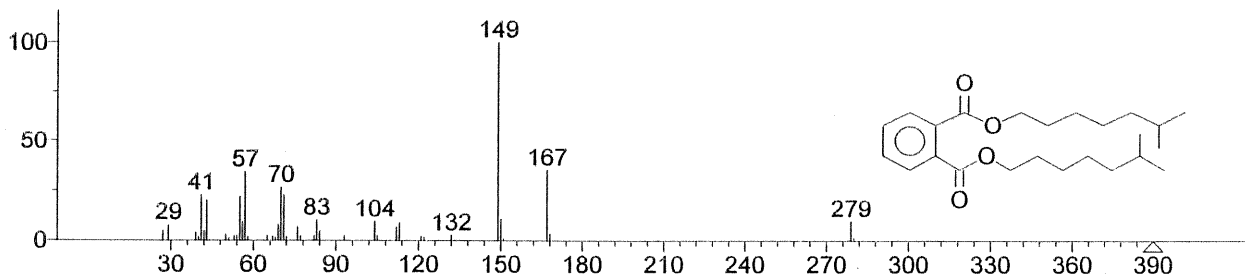

(replib) 1,2-Benzenedicarboxylic acid, diisooctyl ester

Name: 1,2-Benzenedicarboxylic acid, diisooctyl ester

Formula: C<sub>24</sub>H<sub>38</sub>O<sub>4</sub>

MW: 390 CAS#: 27554-26-3 NIST#: 113206 ID#: 20061 DB: replib

Other DBs: Fine, TSCA, RTECS, EINECS, IRDB

Contributor: NIST Mass Spectrometry Data Center, 1990.

10 largest peaks:

149 999 | 167 350 | 57 341 | 70 264 | 41 225 | 71 224 | 55 218 | 43 200 | 150 107 | 83 100 |

Synonyms:

1. Diisooctyl phthalate
2. Hexaplas M/O
3. Isooctyl phthalate
4. Corflex 880
5. DIOP
6. Flexol plasticizer diop
7. Morflex 100
8. Palatinol D10
9. Phthalic acid, bis(6-methylheptyl) ester
10. Phthalic acid, diisooctyl ester
11. Witcizer 313
12. Bis(6-methylheptyl) phthalate #

Estimated non-polar retention index (n-alkane scale):

Value: 2704 iu

Confidence interval (Esters): 47(50%) 201(95%) iu
