# Supplementary material for: Probing Antibacterial and Anticancer Potential of Selenicereus undatus, Pistacia vera L. and Olea europaea L. against Uropathogens, MCF-7 and A2780 Cancer Cells
Source: MDPI journal article supplement (doi:10.3390/molecules28248148), 2023-12-18
Supplement: s1 [file s1]

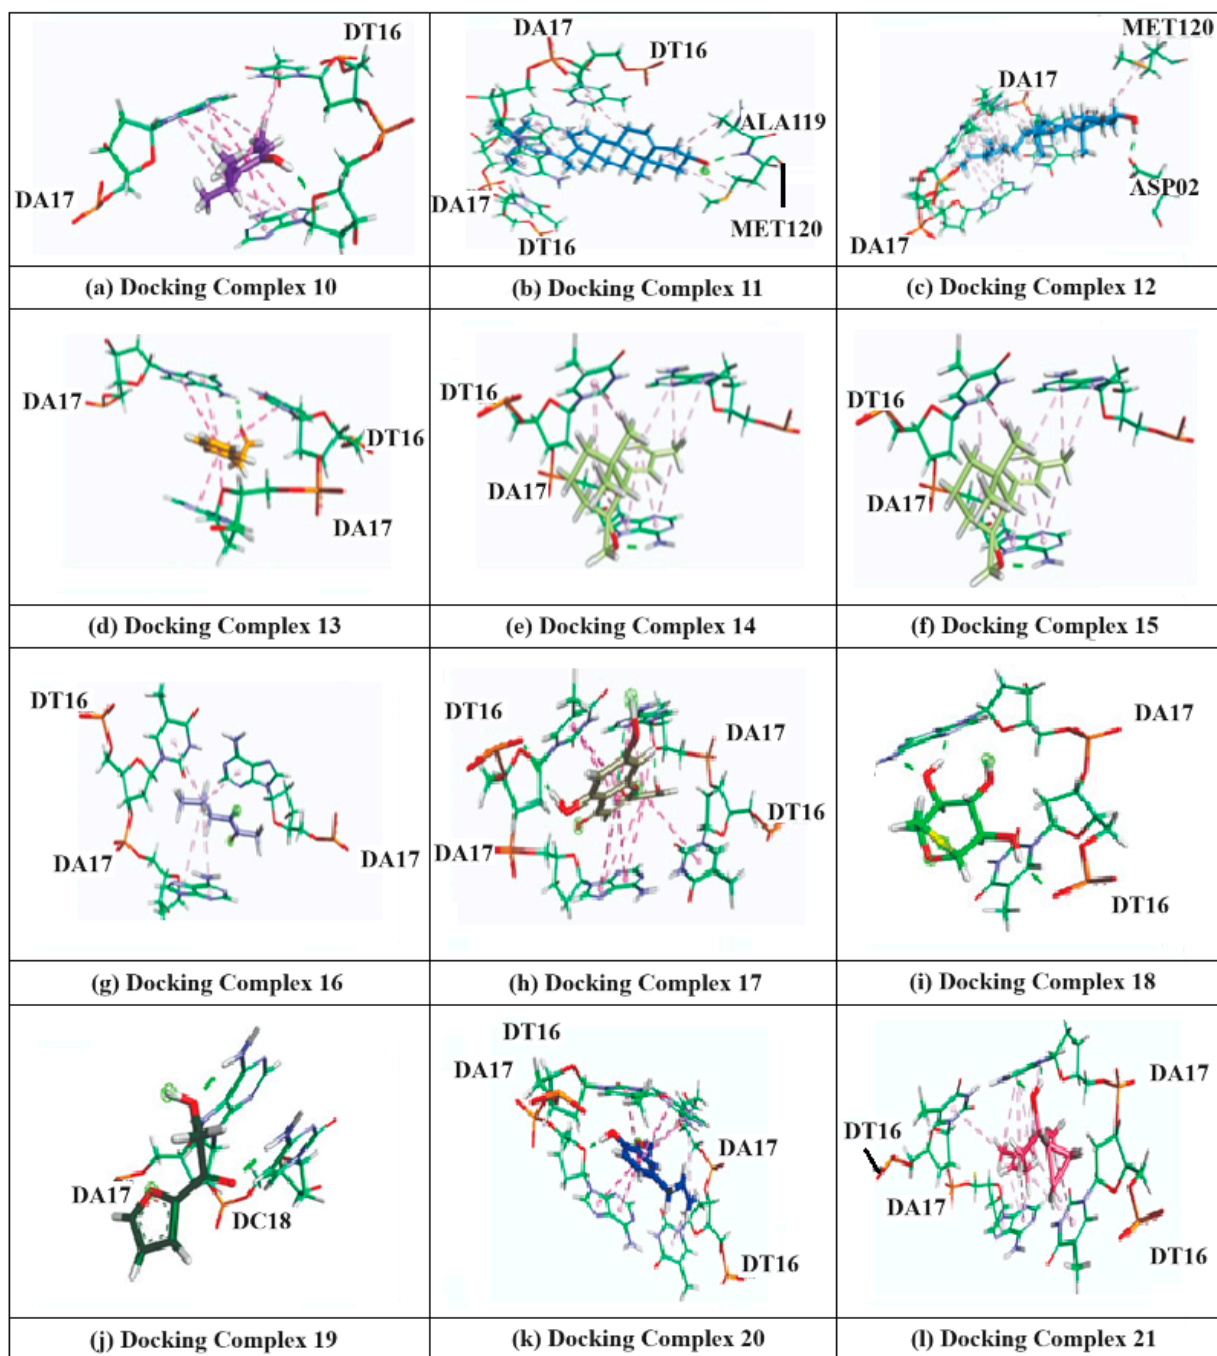

**Figure S2.** DNA Gyrase (6rku) with Thymol (2a), Stigmasterol (2b), Melezitose (2c), Phenylacetaldehyde (2d), 1-Oxaspiro[2.5]octane, 5,5-dimethyl-4-(3-methyl-1,3-butadienyl)- (2e), *Olea europaea* (2f), N-propyl acetamide (2g), Luteolin(2h), Levoglucosan (2i), Furyl hyrdoxymethyl ketone (2j), Eugenol (2k), a-Methyl-a-[4-methyl-3-pentenyl] oxiranemethanol (2l).
