# Supplementary material for: Probing Antibacterial and Anticancer Potential of Selenicereus undatus, Pistacia vera L. and Olea europaea L. against Uropathogens, MCF-7 and A2780 Cancer Cells
Source: MDPI journal article supplement (doi:10.3390/molecules28248148), 2023-12-18
Supplement: s1 [file s1]

|               |                     |             |                    |                 |           |                        |                      |
|---------------|---------------------|-------------|--------------------|-----------------|-----------|------------------------|----------------------|
| Sample Name   | ALI-PI5-H1-210421   | Position    | 12                 | Instrument Name | GCMS TQQQ | User Name              | HEJ-G-104-03\Agilent |
| Inj Vol       | 1                   | InjPosition |                    | SampleType      |           | IRM Calibration Status | Not Applicable       |
| Data Filename | ALI-PI5-H1-210421.D | ACQ Method  | ALI-IMRAN-140421.M | Comment         |           | Acquired Time          | 4/21/2021 2:42:58 PM |

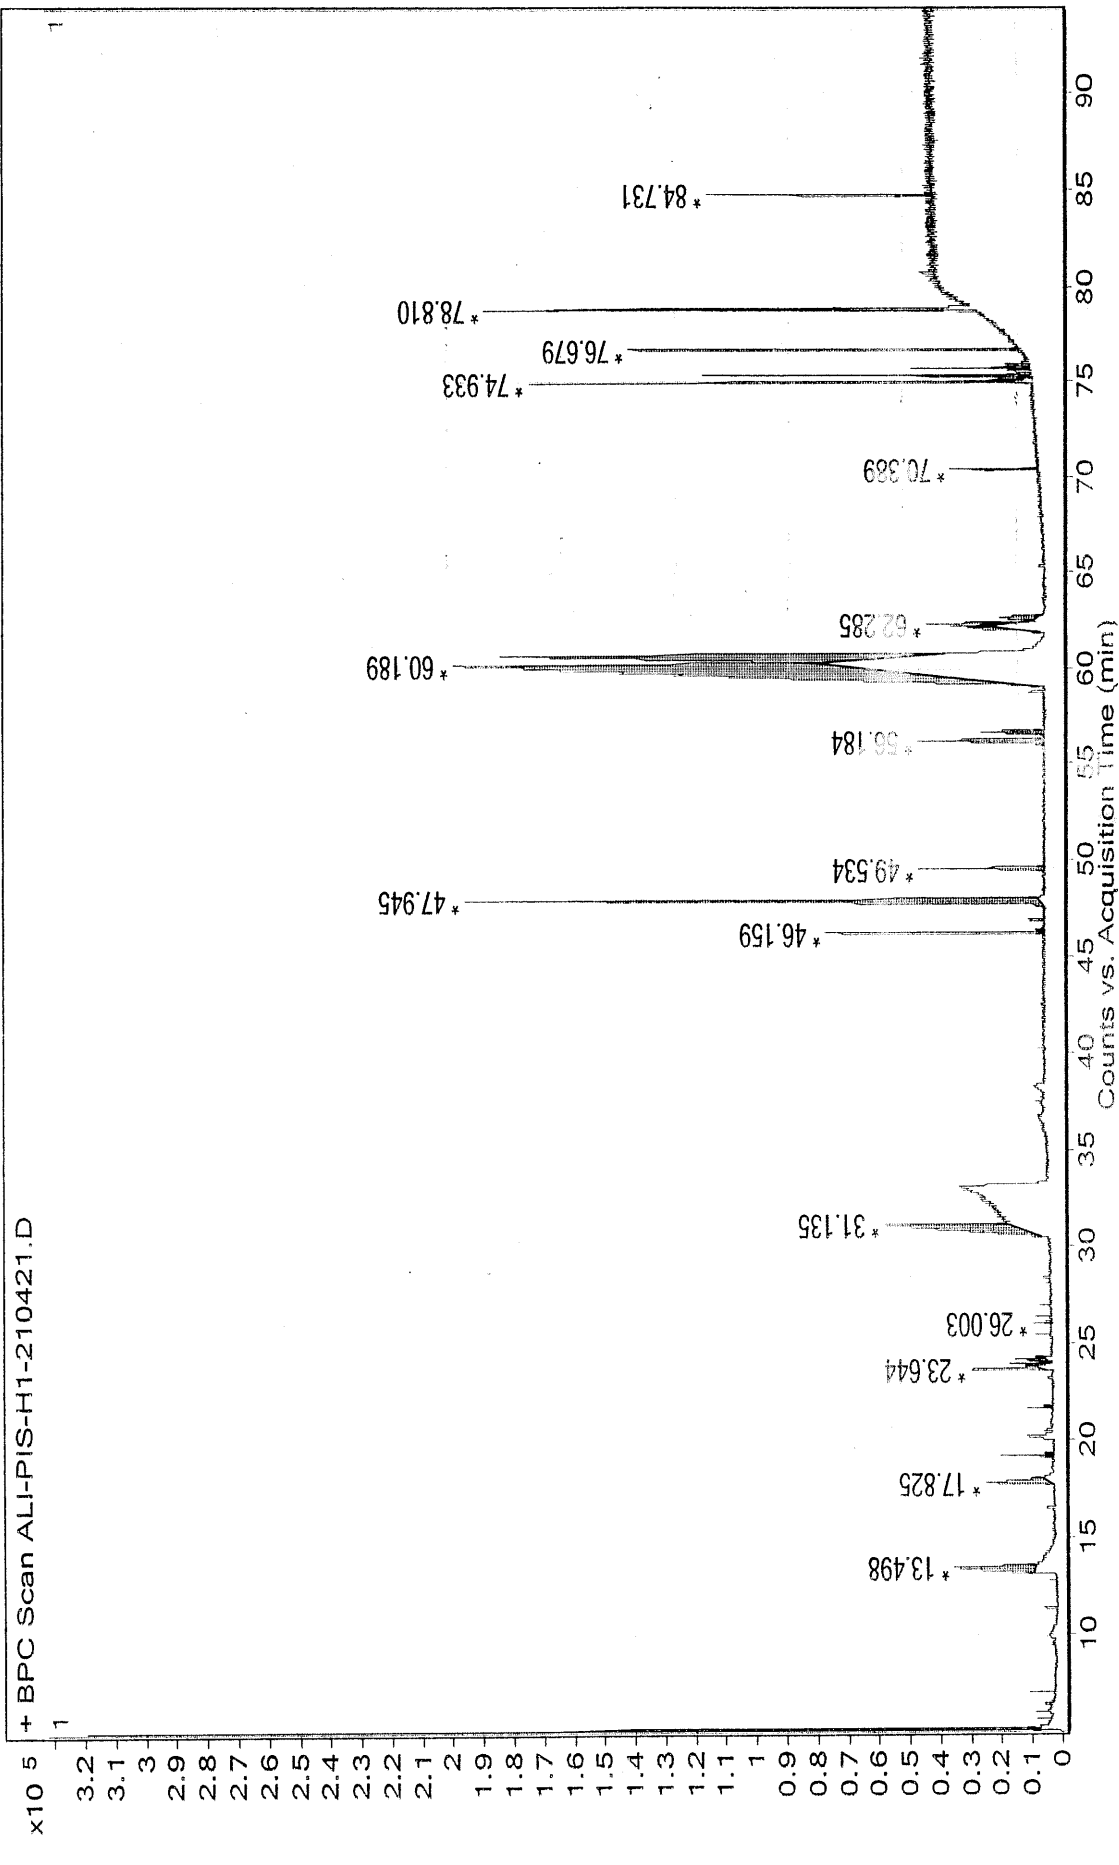



|               |                     |             |                    |                 |           |                        |                      |
|---------------|---------------------|-------------|--------------------|-----------------|-----------|------------------------|----------------------|
| Sample Name   | ALI-PIS-H1-210421   | Position    | 12                 | Instrument Name | GCMS TQQQ | User Name              | HEJ-G-104-03\Agilent |
| Inj Vol       | 1                   | InjPosition |                    | SampleType      |           | IRM Calibration Status | Not Applicable       |
| Data Filename | ALI-PIS-H1-210421.D | ACQ Method  | ALI-IMRAN-140421.M | Comment         |           | Acquired Time          | 4/21/2021 2:42:58 PM |

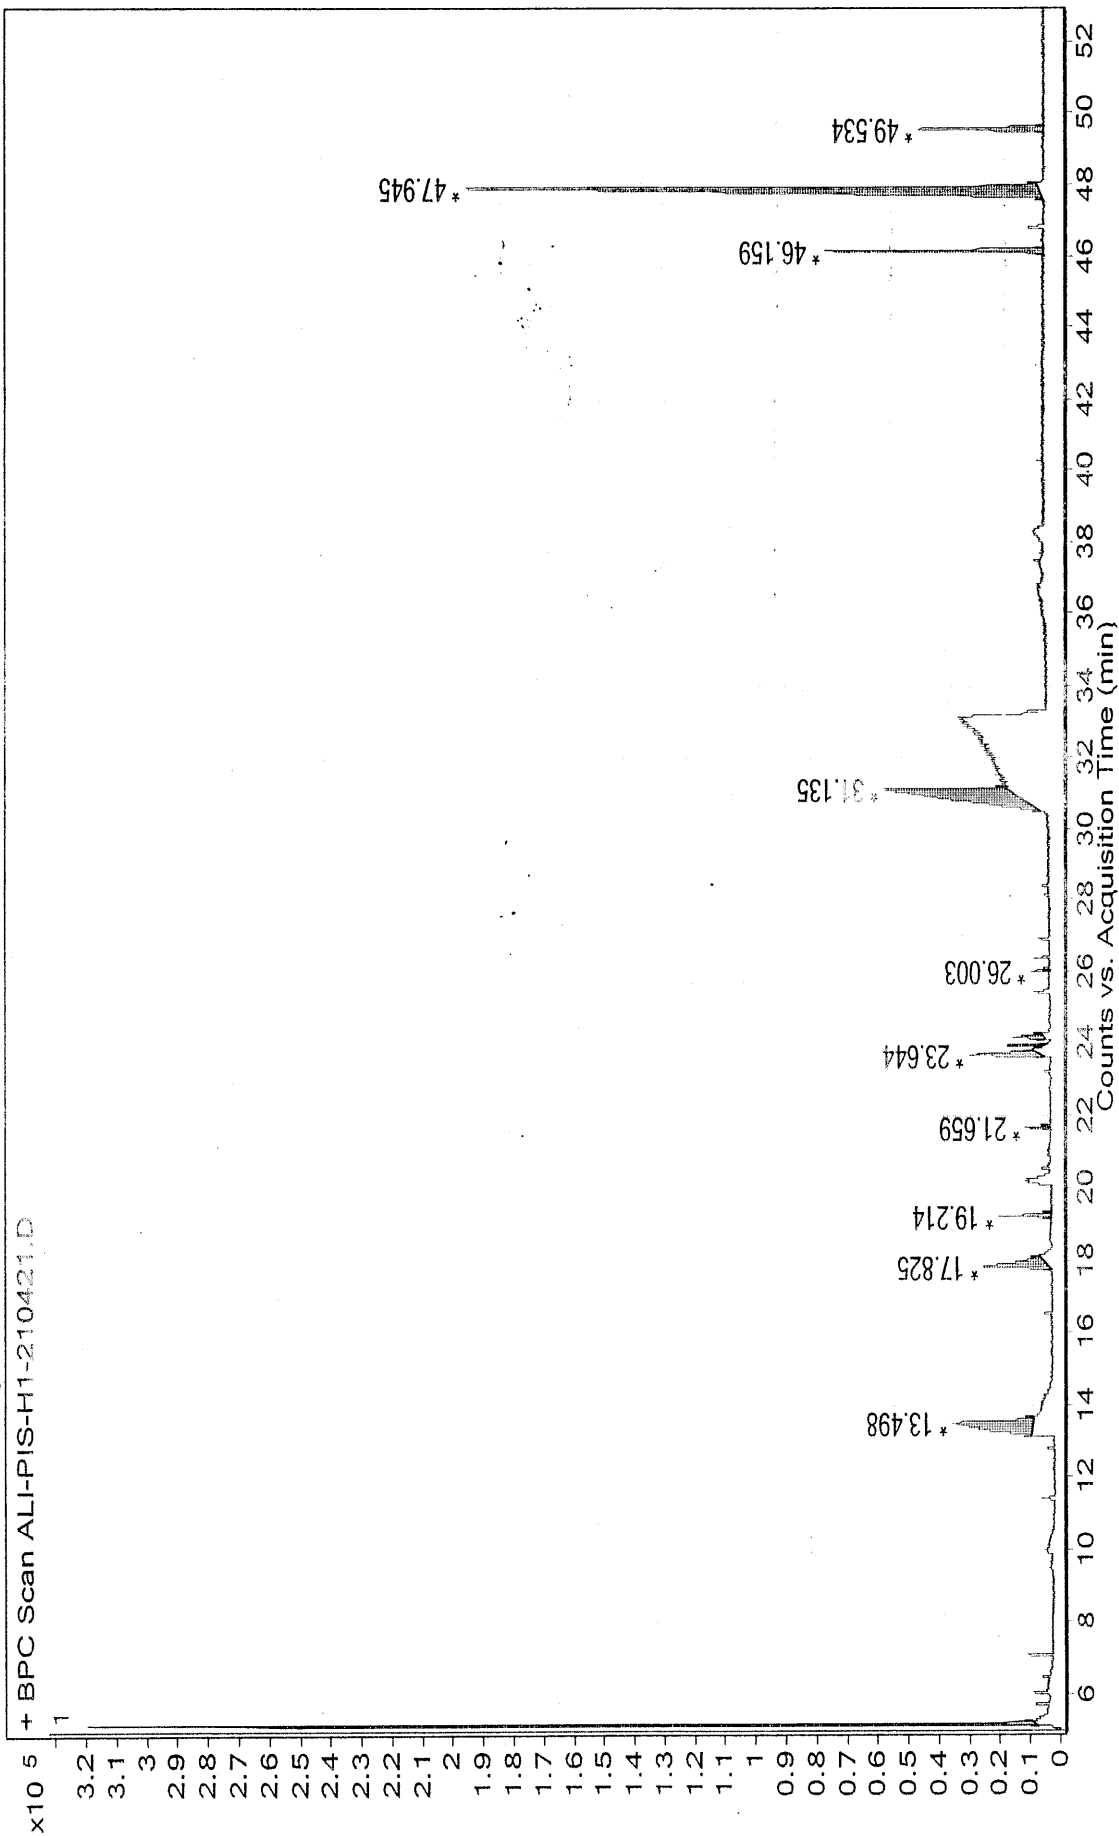



|               |                     |             |                    |                 |           |                        |                      |
|---------------|---------------------|-------------|--------------------|-----------------|-----------|------------------------|----------------------|
| Sample Name   | ALI-PIS-H1-210421   | Position    | 12                 | Instrument Name | GCMS TQCC | User Name              | HEJ-G-104-03\Agilent |
| Inj Vol       | 1                   | InjPosition |                    | SampleType      |           | IRM Calibration Status | Not Applicable       |
| Data Filename | ALI-PIS-H1-210421.D | ACQ Method  | ALI-IMRAN-140421.M | Comment         |           | Acquired Time          | 4/21/2021 2:42:58 PM |

+ BPC Scan ALI-PIS-H1-210421.D

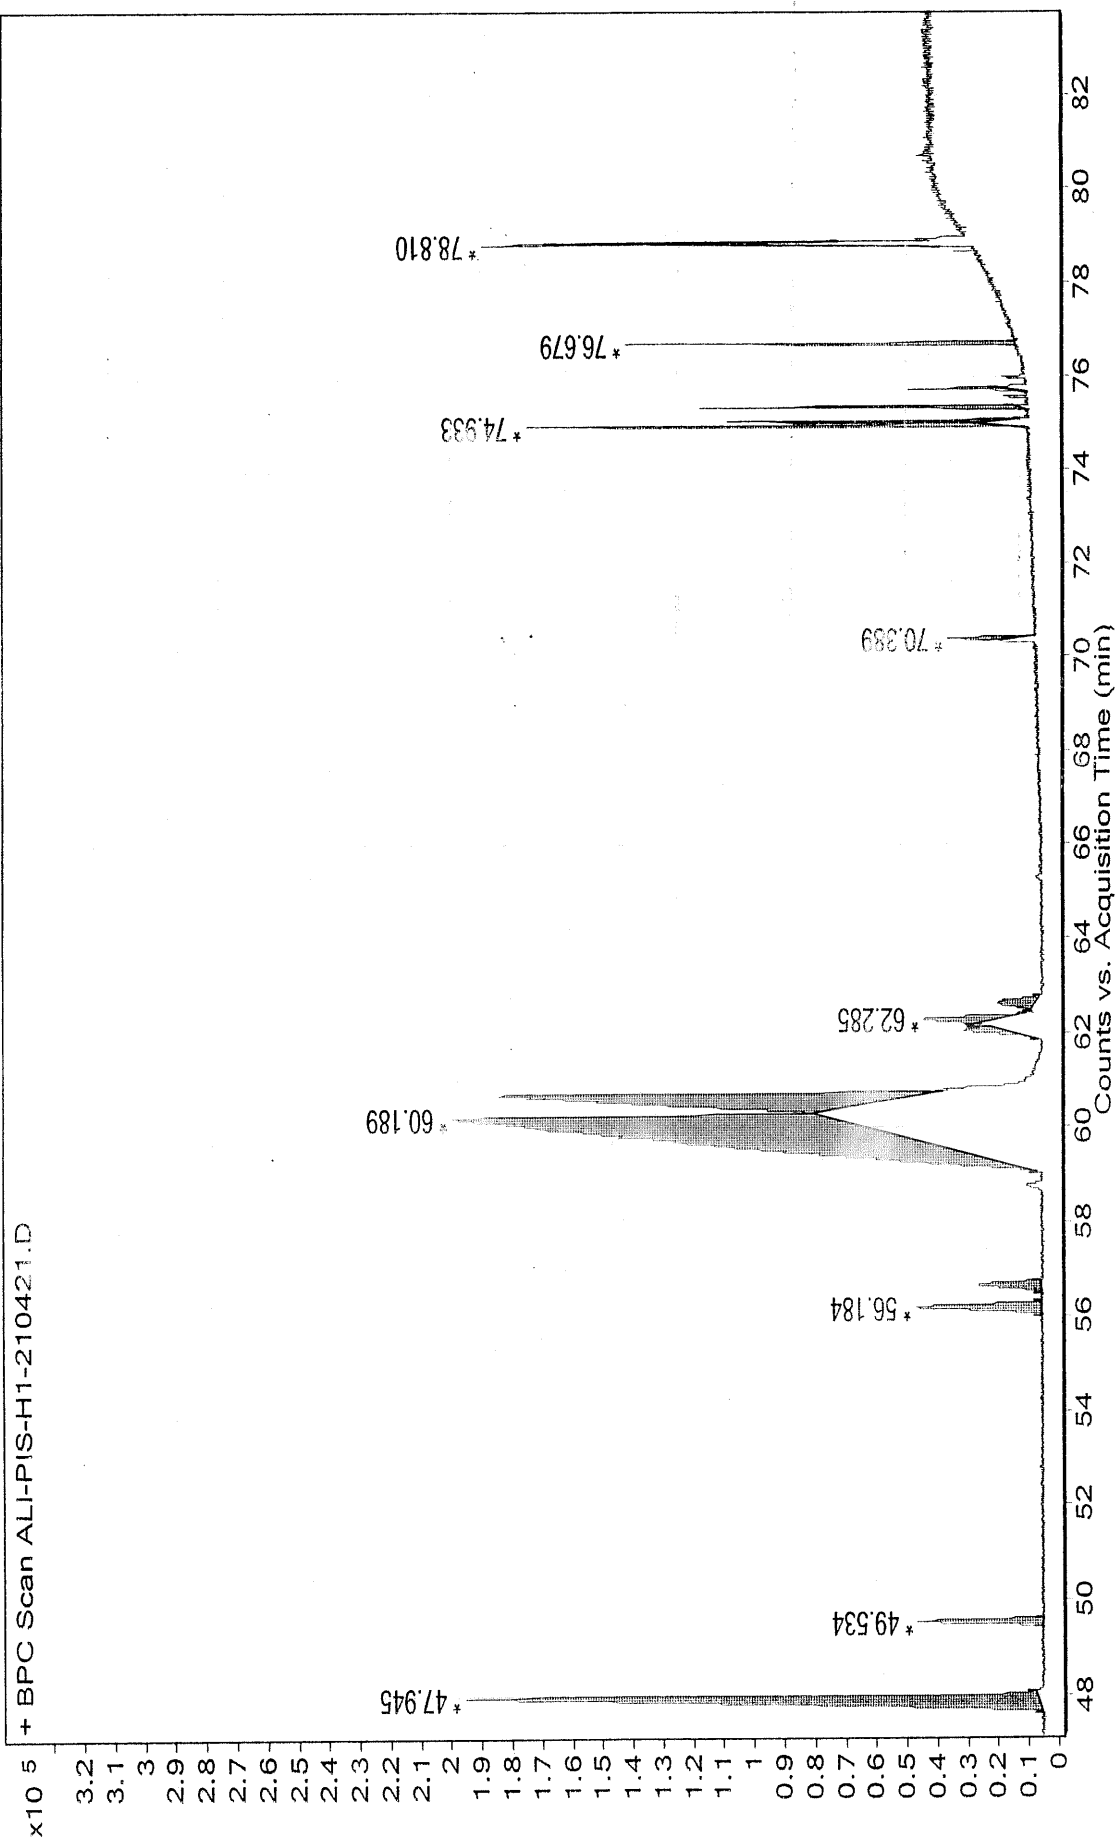



PIS-H1

| Peak Number | RT     | Area    | Area % | Height | Width | Area Sum % | Height % |
|-------------|--------|---------|--------|--------|-------|------------|----------|
| 1           | 5.156  | 899253  | 17.24  | 311558 | 0.118 | 5.81       | 100      |
| 2           | 13.498 | 422849  | 8.1    | 26614  | 0.495 | 2.73       | 8.54     |
| 3           | 17.825 | 225671  | 4.33   | 21651  | 0.378 | 1.46       | 6.95     |
| 4           | 19.214 | 66013   | 1.27   | 17485  | 0.157 | 0.43       | 5.61     |
| 5           | 21.659 | 24497   | 0.47   | 8203   | 0.121 | 0.16       | 2.63     |
| 6           | 23.644 | 162104  | 3.11   | 24119  | 0.21  | 1.05       | 7.74     |
| 7           | 23.922 | 33601   | 0.64   | 12518  | 0.082 | 0.22       | 4.02     |
| 8           | 24.146 | 46874   | 0.9    | 10059  | 0.143 | 0.3        | 3.23     |
| 9           | 26.003 | 15507   | 0.3    | 6618   | 0.086 | 0.1        | 2.12     |
| 10          | 31.135 | 913550  | 17.51  | 40591  | 0.709 | 5.9        | 13.03    |
| 11          | 46.159 | 363673  | 6.97   | 71483  | 0.207 | 2.35       | 22.94    |
| 12          | 47.945 | 2034353 | 38.99  | 188491 | 0.438 | 13.14      | 60.5     |
| 13          | 49.534 | 243980  | 4.68   | 41234  | 0.21  | 1.58       | 13.23    |
| 14          | 56.184 | 350813  | 6.72   | 41310  | 0.328 | 2.27       | 13.26    |
| 15          | 56.651 | 170586  | 3.27   | 20383  | 0.285 | 1.1        | 6.54     |
| 16          | 60.189 | 5217392 | 100    | 125159 | 1.251 | 33.71      | 40.17    |
| 17          | 60.681 | 2001417 | 38.36  | 138717 | 0.456 | 12.93      | 44.52    |
| 18          | 62.028 | 108871  | 2.09   | 14280  | 0.271 | 0.7        | 4.58     |
| 19          | 62.285 | 176272  | 3.38   | 25055  | 0.221 | 1.14       | 8.04     |
| 20          | 62.602 | 125250  | 2.4    | 12394  | 0.324 | 0.81       | 3.98     |
| 21          | 70.389 | 73633   | 1.41   | 22322  | 0.096 | 0.48       | 7.16     |
| 22          | 74.933 | 457304  | 8.76   | 155143 | 0.1   | 2.95       | 49.8     |
| 23          | 75.025 | 235814  | 4.52   | 86666  | 0.089 | 1.52       | 27.82    |
| 24          | 75.328 | 298687  | 5.72   | 104714 | 0.096 | 1.93       | 33.61    |
| 25          | 75.699 | 78431   | 1.5    | 33155  | 0.096 | 0.51       | 10.64    |
| 26          | 76.679 | 345632  | 6.62   | 127955 | 0.093 | 2.23       | 41.07    |
| 27          | 78.81  | 143384  | 2.75   | 59801  | 0.064 | 0.93       | 19.19    |
| 28          | 78.842 | 15808   | 0.3    | 12121  | 0.036 | 0.1        | 3.89     |
| 29          | 84.731 | 227563  | 4.36   | 72045  | 0.1   | 1.47       | 23.12    |

100.01





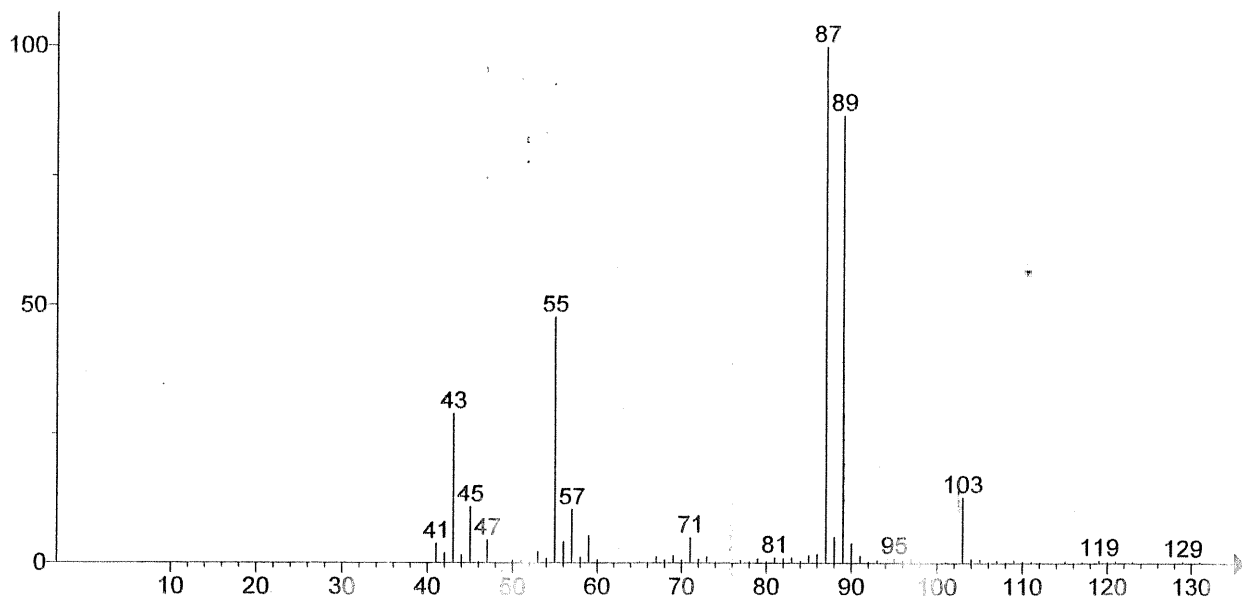

(Text File) +EI Scan (5.156 min) ALI-PIS-H1-210421.D

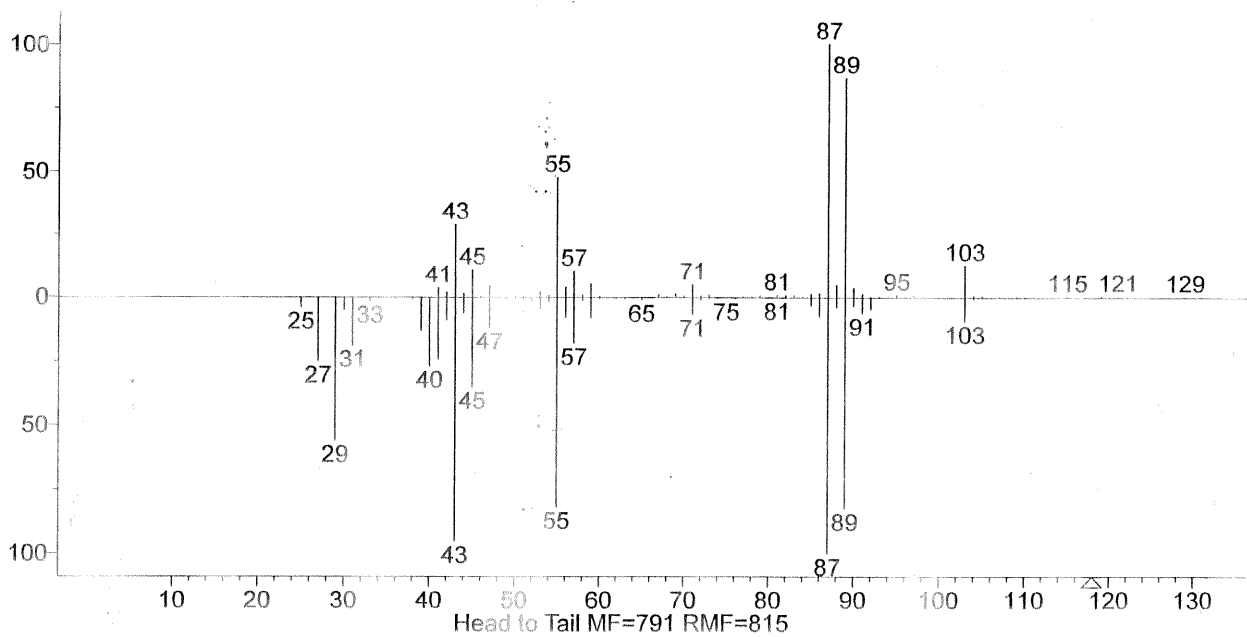

Head to Tail MF=791 RMF=815

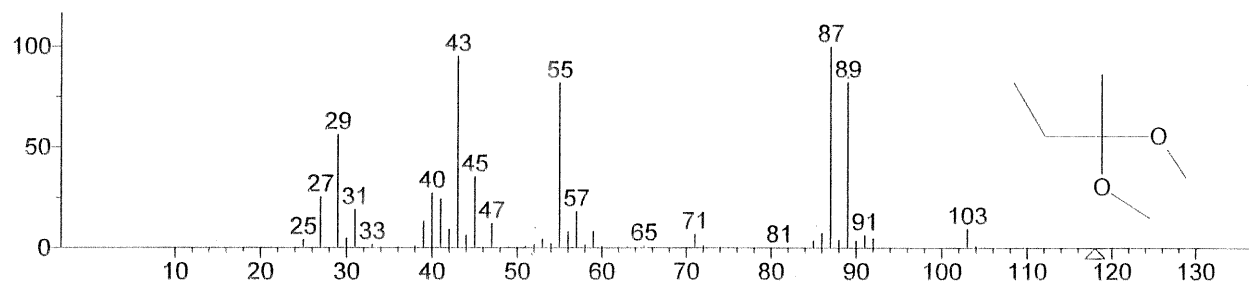

(mainlib) 2,2-Dimethoxybutane

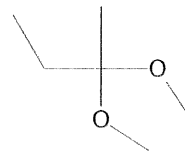

Name: 2,2-Dimethoxybutane

Formula: C<sub>6</sub>H<sub>14</sub>O<sub>2</sub>

MW: 118 CAS#: 3453-99-4 NIST#: 250250 ID#: 48775 DB: mainlib

Other DBs: None

Contributor: TNO Volatile Compounds in Food - Chemical Concepts

10 largest peaks:

87 999 | 43 950 | 89 822 | 55 817 | 29 560 | 45 351 | 40 270 | 27 251 | 41 242 | 31 188 |

Synonyms:

no synonyms.

Estimated non-polar retention index (n-alkane scale):

Value: 685 iu

Confidence interval (Ethers): 68(50%) 293(95%) iu

Retention index.

1. Value: 748.5 iu

Column Type: Capillary

Column Class: Semi-standard non-polar

Active Phase: SE-54

Column

Length: 30 m

Carrier Gas: He

Column Diameter: 0.25 mm

Phase Thickness: 0.25 µm

Data Type: Normal

alkane RI

Program Type: Complex

Description: 40C(5min) => 4C/min => 230C(20min) => 5C/min => 280C (5min)

Source: Gao, H.; Zhao, T.; Kong, Q.; Chen, X.; Hu, Z., Analysis of unknown organic pollutants in sewage by solid-phase extraction combined with gas chromatography-mass spectrometry, J. Chromatogr. Sci., 42, 2004, 91-99.

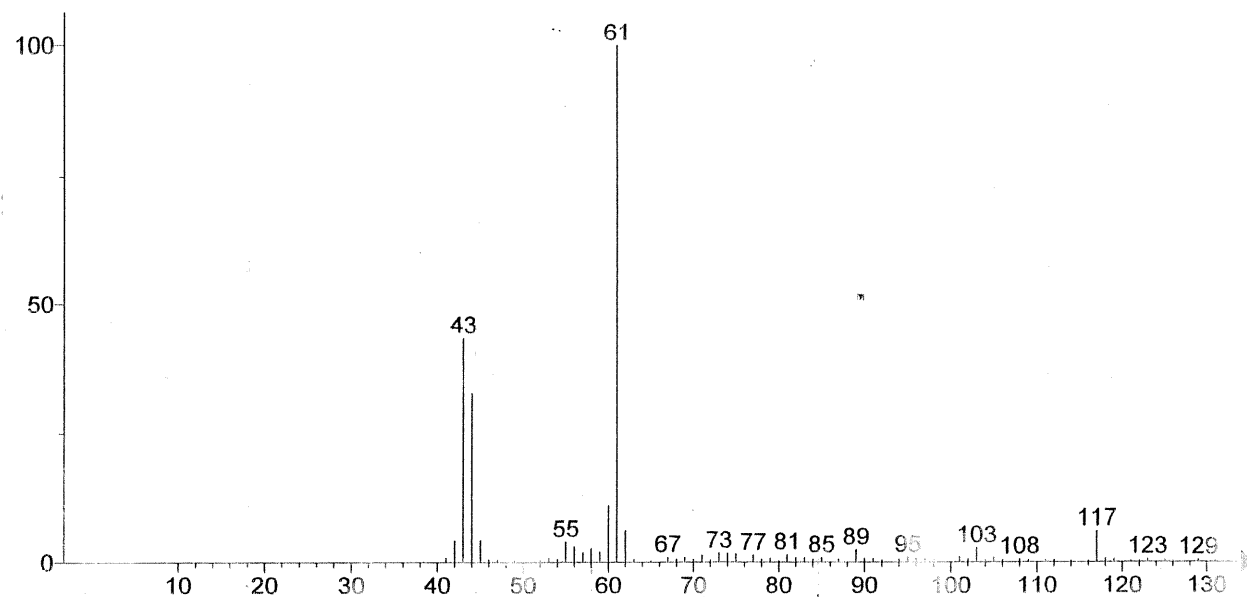

(Text File) +EI Scan (13.477 min) ALI-PIS-H1-210421.D

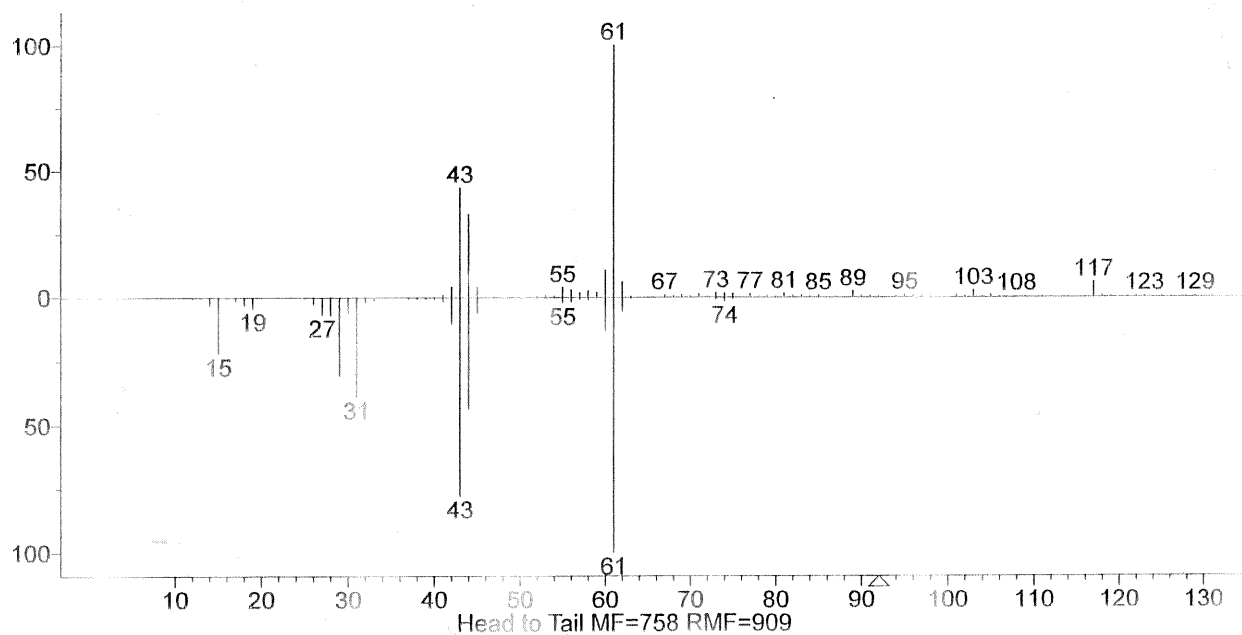

Head to Tail MF=758 RMF=909

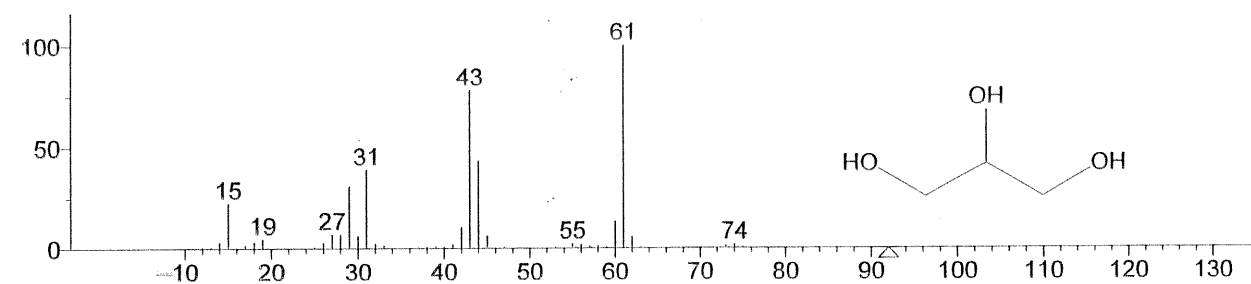

(mainlib) Glycerin

Name: Glycerin

Formula: C<sub>3</sub>H<sub>8</sub>O<sub>3</sub>

MW: 92 CAS#: 56-81-5 NIST#: 118748 ID#: 27364 DB: mainlib

Other DBs: Fine, TSCA, RTECS, USP, HODOC, NIH, EINECS, IRDB

Contributor: NIST Mass Spectrometry Data Center, 1990.

10 largest peaks:

61 999 | 43 777 | 44 433 | 31 387 | 29 304 | 15 220 | 60 130 | 42 102 | 27 68 | 28 68 |

Synonyms:

- 1.1,2,3-Propanetriol
- 2.Glycerol
- 3.Glycerine
- 4.Glyceritol
- 5.Glycyl alcohol
- 6.Glyrol
- 7.Glysanin
- 8.Osmoglyn
- 9.Propanetriol
- 10.Trihydroxypropane
- 11.Synthetic glycerin
- 12.90 Technical glycerin
- 13.Dagralax
- 14.Glycerin, anhydrous
- 15.Glycerin, synthetic
- 16.Ophthalgan
- 17.Synthetic glycerine
- 18.Vitrosupos
- 19.1,2,3-Trihydroxypropane
- 20.90 Technical glycerine
- 21.Clyzerin, wasserfrei
- 22.Grocolene
- 23.Moon
- 24.Star
- 25.Superol
- 26.Optim
- 27.Bulbold
- 28.Cristal
- 29.Croderol G7000
- 30.Dynamite glycerin
- 31.Emery 912
- 32.Glyceol
- 33.Glycerin USP
- 34.Glycon G 100, G 300
- 35.Incorporation factor, IFP
- 36.Lye glycerin
- 37.Polyhydric alcohol
- 38.Pricerine 9071
- 39.Shur-coal FCA

Estimated non-polar retention index (n-alkane scale):

Value: 967 iu

Confidence interval (Alcohols): 41(50%) 176(95%) iu

Retention index.

1. Value: 940 iu

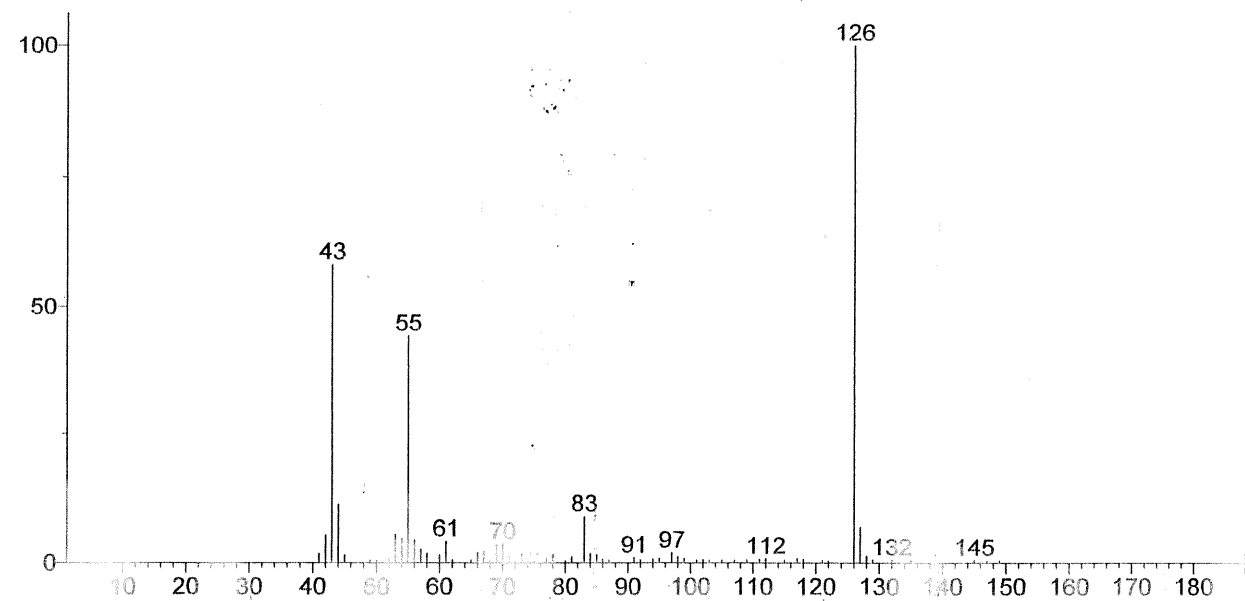

(Text File) +EI Scan (17.835 min) ALI-PIS-H1-210421.D

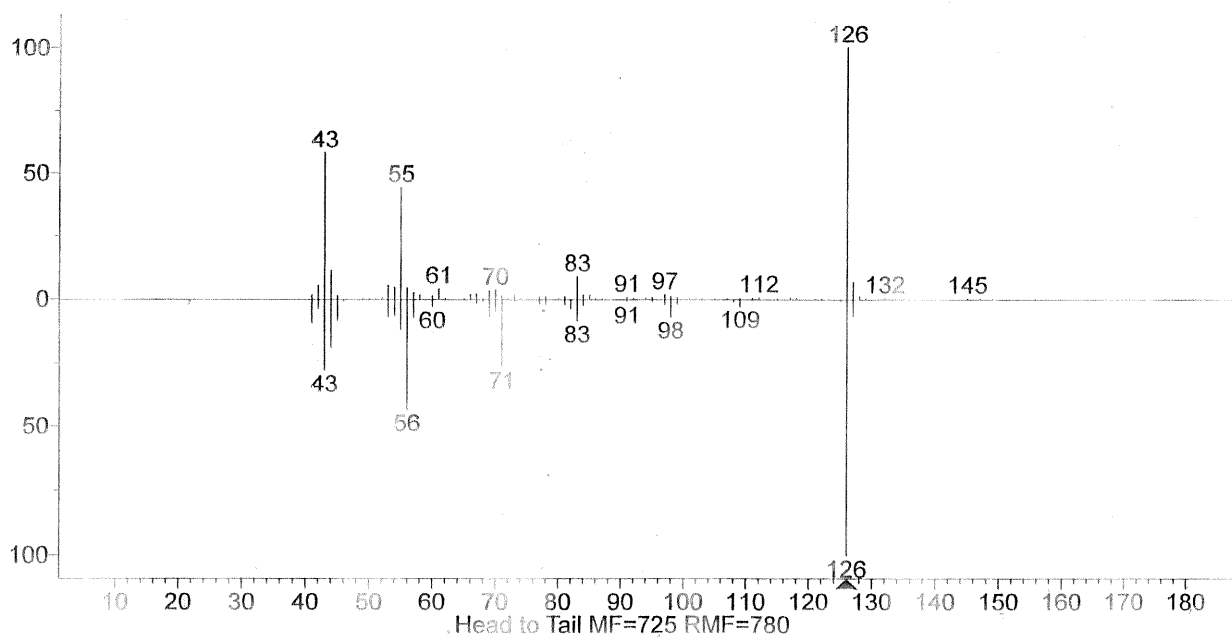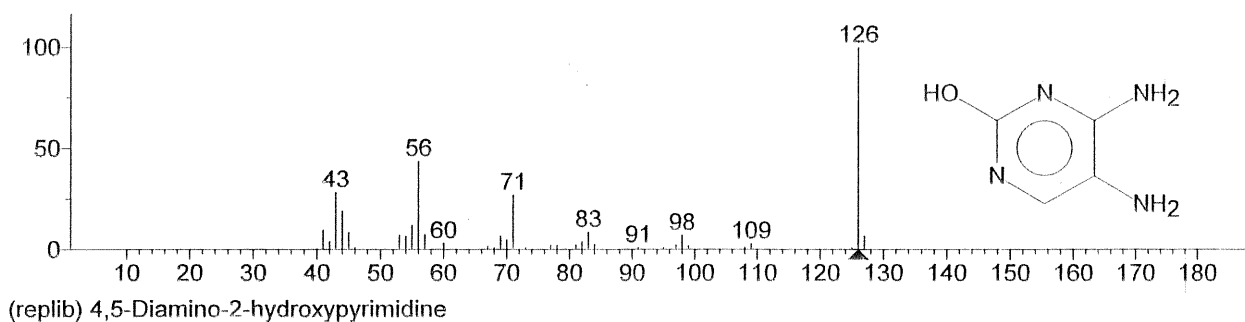

(replib) 4,5-Diamino-2-hydroxypyrimidine

Name: 4,5-Diamino-2-hydroxypyrimidine

Formula:  $C_4H_6N_4O$

MW: 126 CAS#: 23899-73-2 NIST#: 127006 ID#: 17324 DB: replib

Other DBs: None

Contributor: LAC, NIDDK, NIH, Bethesda, MD 20892

10 largest peaks:

126 999 | 56 434 | 43 279 | 71 266 | 44 189 | 55 120 | 41 95 | 45 84 | 83 84 | 57 73 |

Synonyms:

1,4,5-Diamino-2-pyrimidinol #

Estimated non-polar retention index (n-alkane scale):

Value: 1512 iu

Confidence interval (Diverse functional groups): 89(50%) 382(95%) iu

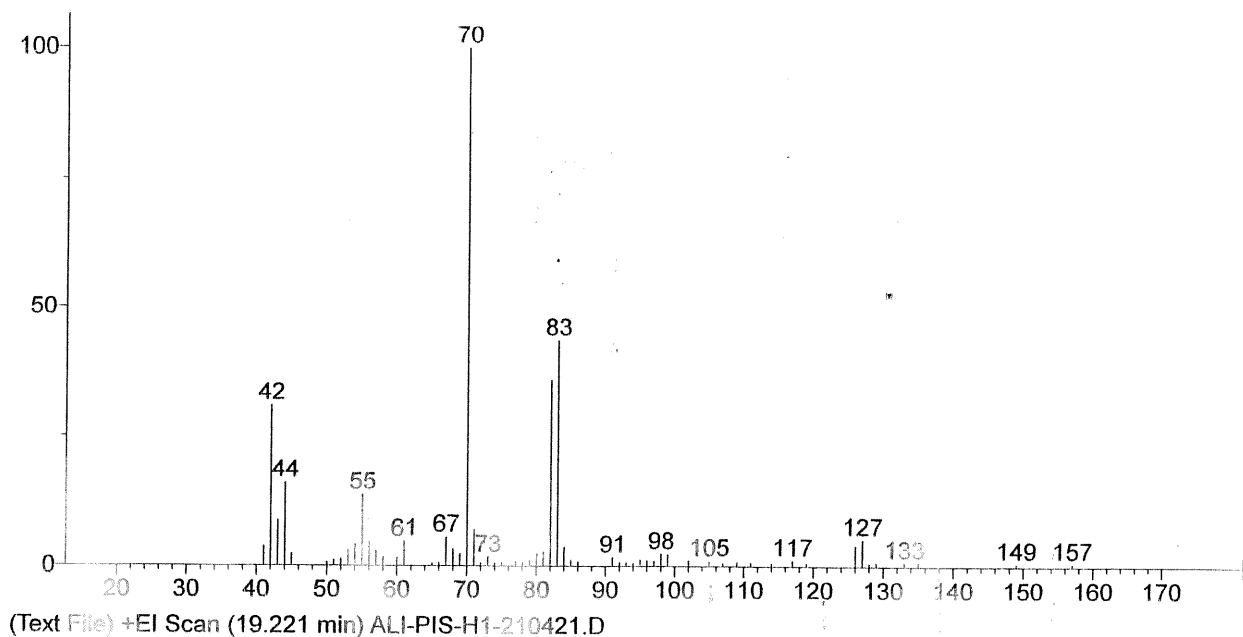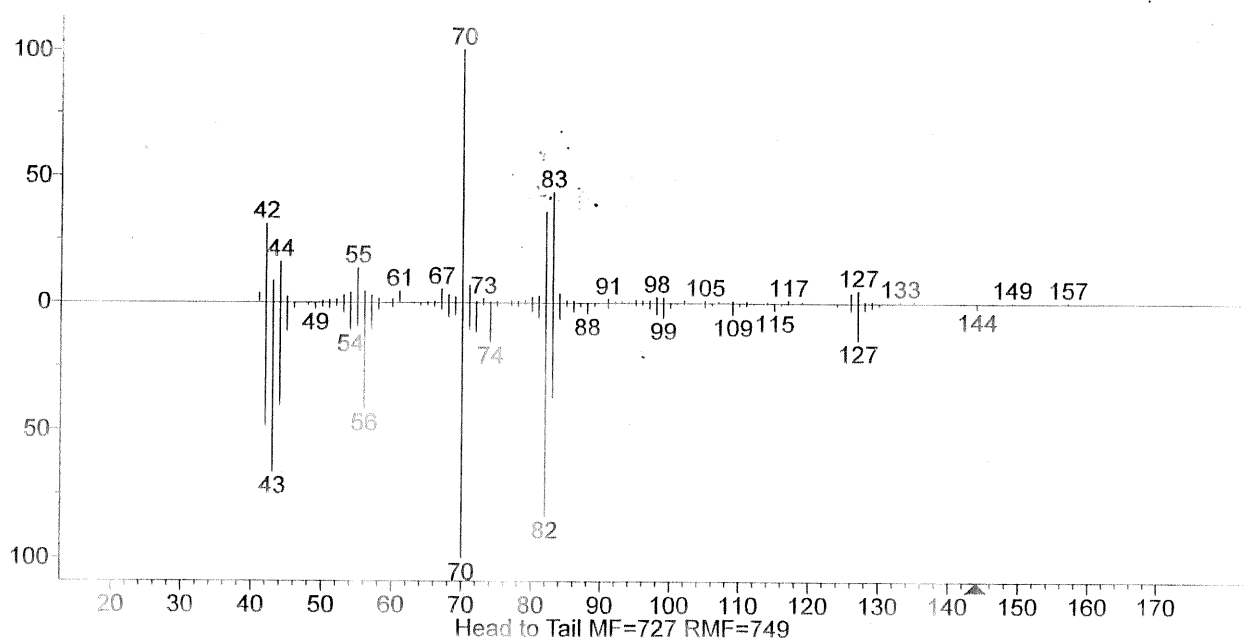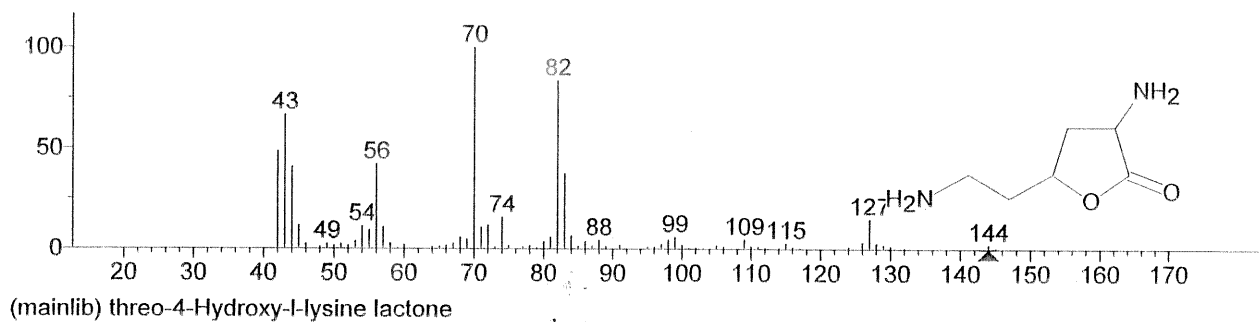

Name: threo-4-Hydroxy-L-lysine lactone

Formula:  $C_6H_{12}N_2O_2$

MW: 144 NIST#: 130378 ID#: 32477 DB: mainlib

Contributor: LAC, NIDDK, NIH, Bethesda, MD 20892

10 largest peaks:

70 999 | 82 835 | 43 663 | 42 484 | 56 418 | 44 406 | 83 372 | 74 154 | 127 146 | 72 116 |

Synonyms:

no synonyms.

Estimated non-polar retention index (n-alkane scale):

Value: 1433 iu

Confidence interval (Diverse functional groups): 89(50%) 382(95%) iu



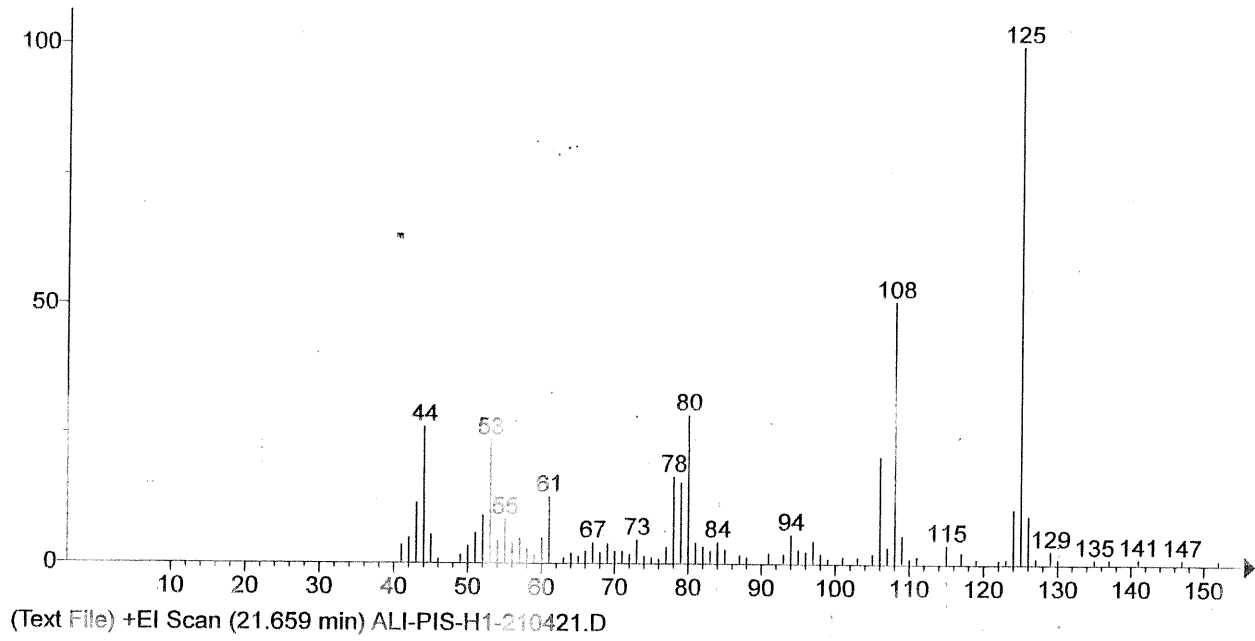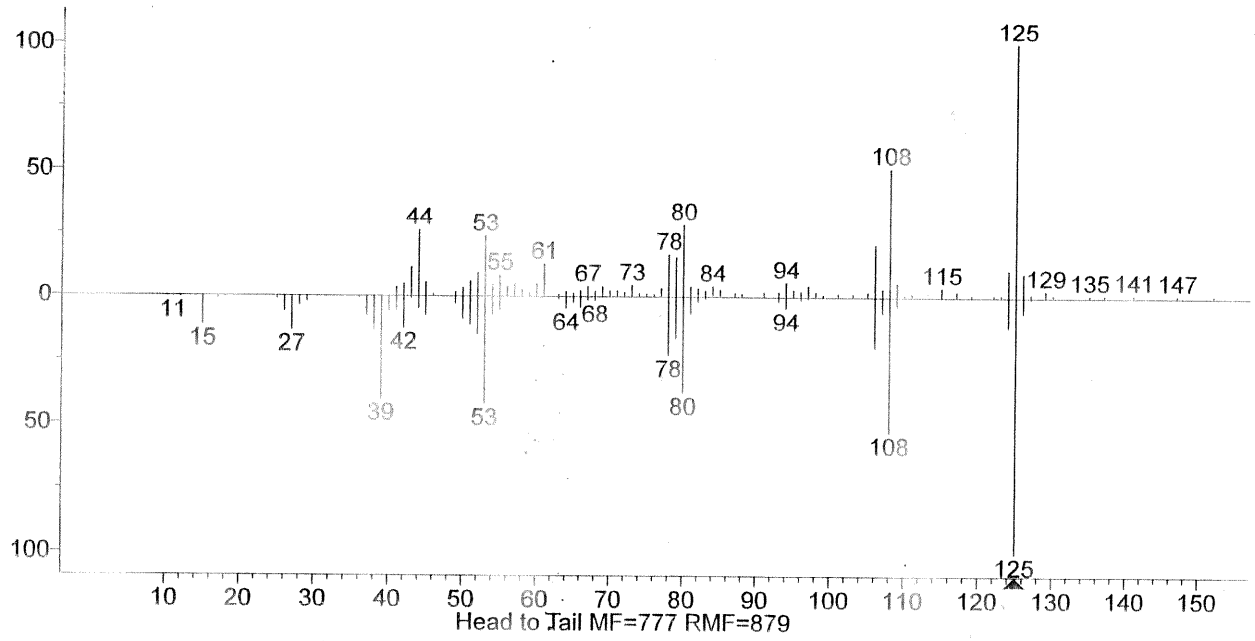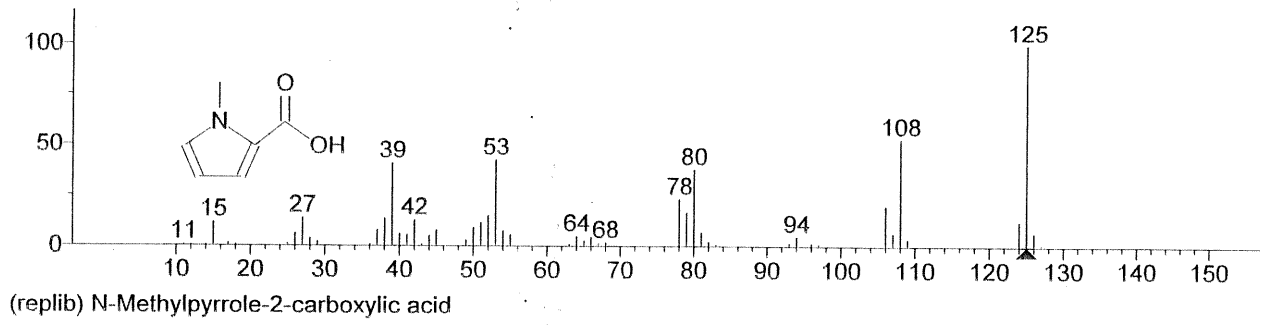

Name: N-Methylpyrrole-2-carboxylic acid

Formula:  $C_6H_7NO_2$

MW: 125 CAS#: 6973-60-0 NIST#: 136662 ID#: 17222 DB: replib

Other DBs: Fine, HODOC, EINECS

Contributor: NIST Mass Spectrometry Data Center, 1994

10 largest peaks:

125 999 | 108 527 | 53 421 | 39 404 | 80 376 | 78 230 | 106 198 | 79 166 | 52 149 | 27 135 |

Synonyms:

1. 1H-Pyrrole-2-carboxylic acid, 1-methyl-

2. 1-Methyl-1H-pyrrole-2-carboxylic acid #

Estimated non-polar retention index (n-alkane scale):

Value: 1123 iu

Confidence interval (Diverse functional groups): 89(50%) 382(95%) iu

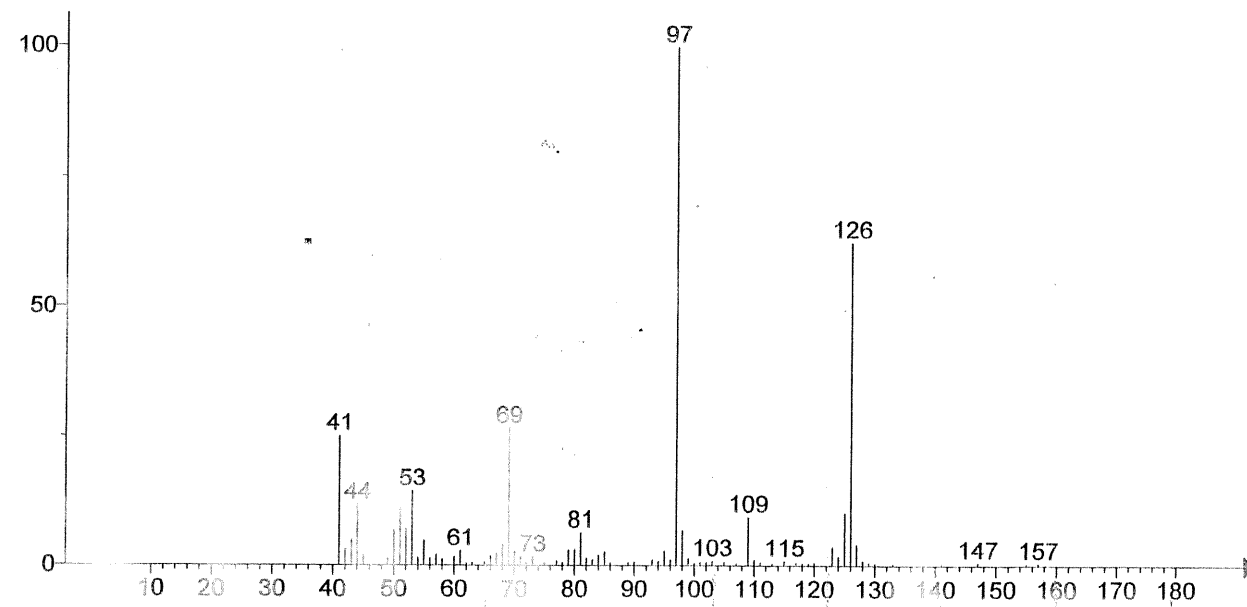

(Text File) +EI Scan (23.658 min) ALI-PIS-H1-210421.D

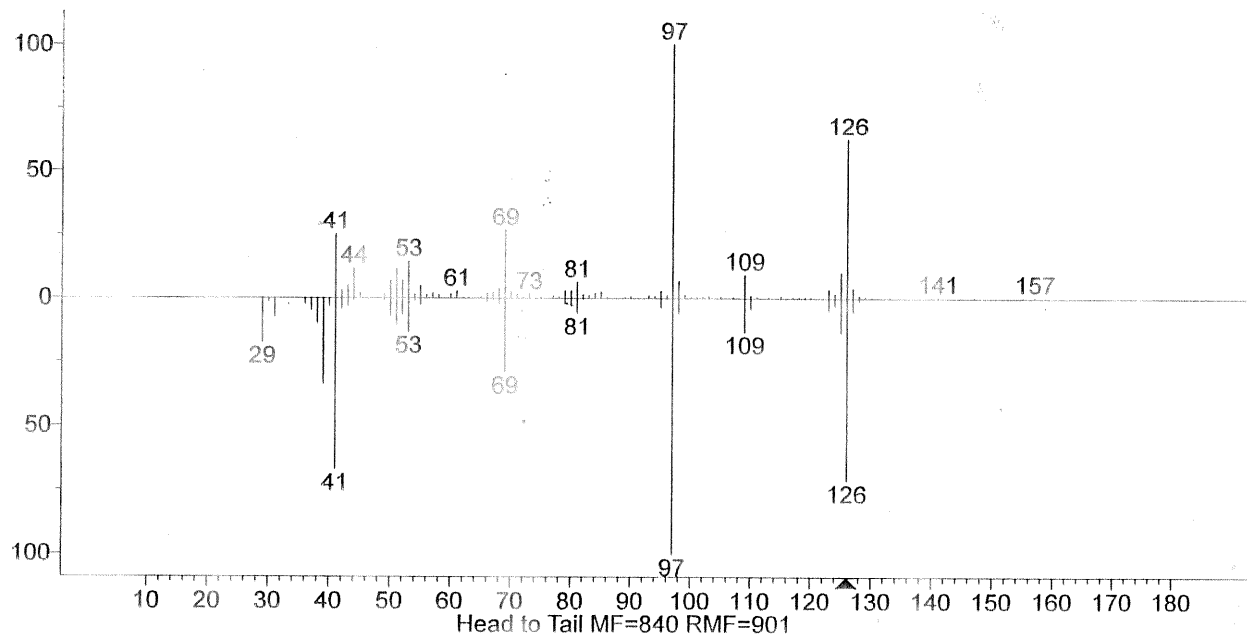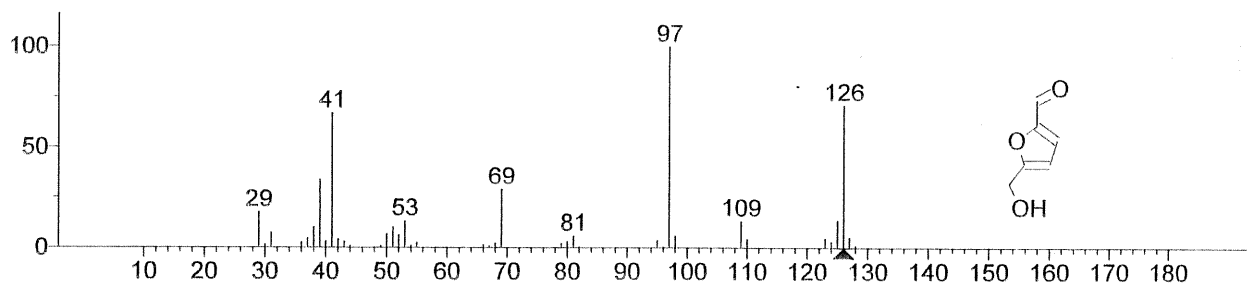

(replib) 2-Furancarboxaldehyde, 5-(hydroxymethyl)-

16  
Name: 2-Furancarboxaldehyde, 5-(hydroxymethyl)-

Formula: C<sub>6</sub>H<sub>6</sub>O<sub>3</sub>

MW: 126 CAS#: 67-47-0 NIST#: 60544 ID#: 12795 DB: replib

Other DBs: Fine, TSCA, RTECS, HODOC, NIH, EINECS

Contributor: D.HENNEBERG, MAX-PLANCK INSTITUTE, MULHEIM, WEST GERMANY

10 largest peaks:

97 999 | 126 710 | 41 668 | 39 336 | 69 289 | 29 173 | 125 136 | 53 131 | 109 131 | 38 100 |

Synonyms:

1.2-Furaldehyde, 5-(hydroxymethyl)-

2.5-Hydroxymethylfurfural

3.Hydroxymethylfurfurole

4.HMF

5.5-(Hydroxymethyl)Furfurole

6.5-(Hydroxymethyl)-2-formylfuran

7.5-(Hydroxymethyl)-2-furaldehyde

8.5-(Hydroxymethyl)-2-furancarboxal

9.5-(Hydroxymethyl)-2-furfural

10.5-(Hydroxymethyl)-2-furfuraldehyde

11.5-(Hydroxymethyl)furan-2-aldehyde

12.5-(Hydroxymethyl)furfural

13.5-Hydroxymethylfuraldehyde

14.5-Oxymethylfurfurole

15.5-Hydroxymethylfurfuraldehyde

16.5-Hydroxymethyl-2-furancarboxaldehyde

17.Hydroxymethylfurfuraldehyde

18.5-(Hydroxymethyl)-2-furancarboxaldehyde

19.2-Hydroxymethyl-5-furfural

Estimated non-polar retention index (n-alkane scale):

Value: 1163 iu

Confidence interval (Diverse functional groups): 89(50%) 382(95%) iu

Retention index.

1. Value: 1176 iu

Column Type: Capillary

Column Class: Standard non-polar

Active Phase: DB-1

Column

Length: 60 m

Carrier Gas: N<sub>2</sub>

Column Diameter: 0.25 mm

Phase Thickness: 1 µm

Data Type: Linear

RI

Program Type: Ramp

Start T: 30 C

End T: 200 C

Heat Rate: 5 K/min

End Time: 30 min

Source: Wu, C.-M.;

Wang, Z.; Wu, Q.H., Volatile compounds produced from monosodium glutamate in common food cooking, J. Agric. Food Chem., 48, 2000, 2438-2442.

2. Value: 1208 iu

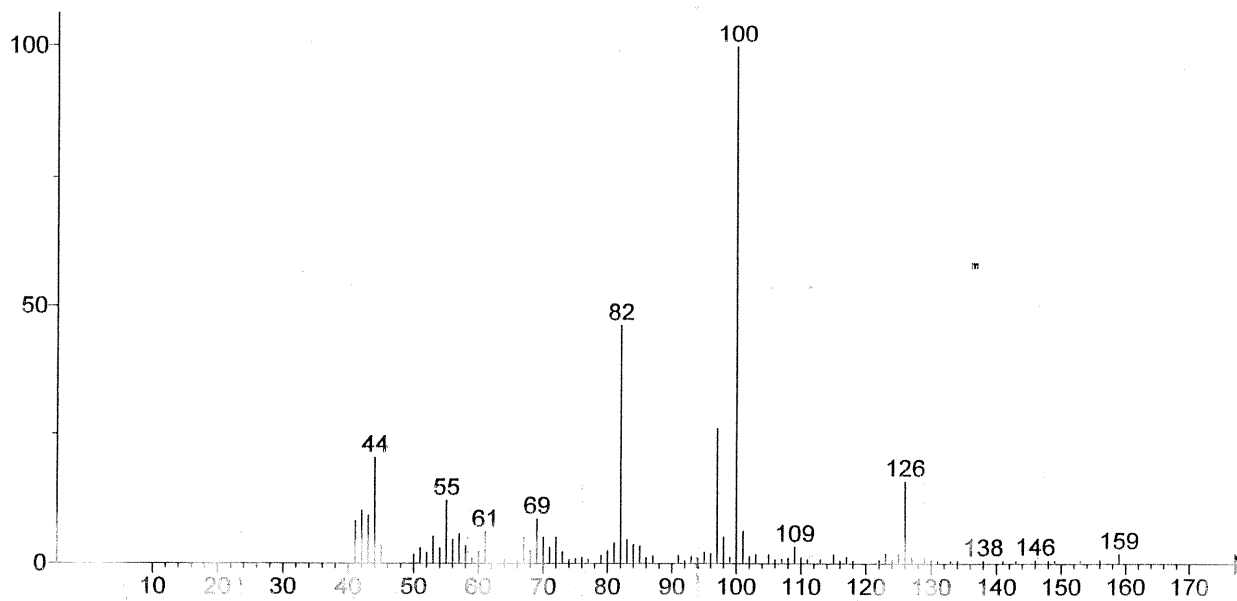

(Text File) +EI Scan (23.918 min) ALI-PIS-H1-210421.D

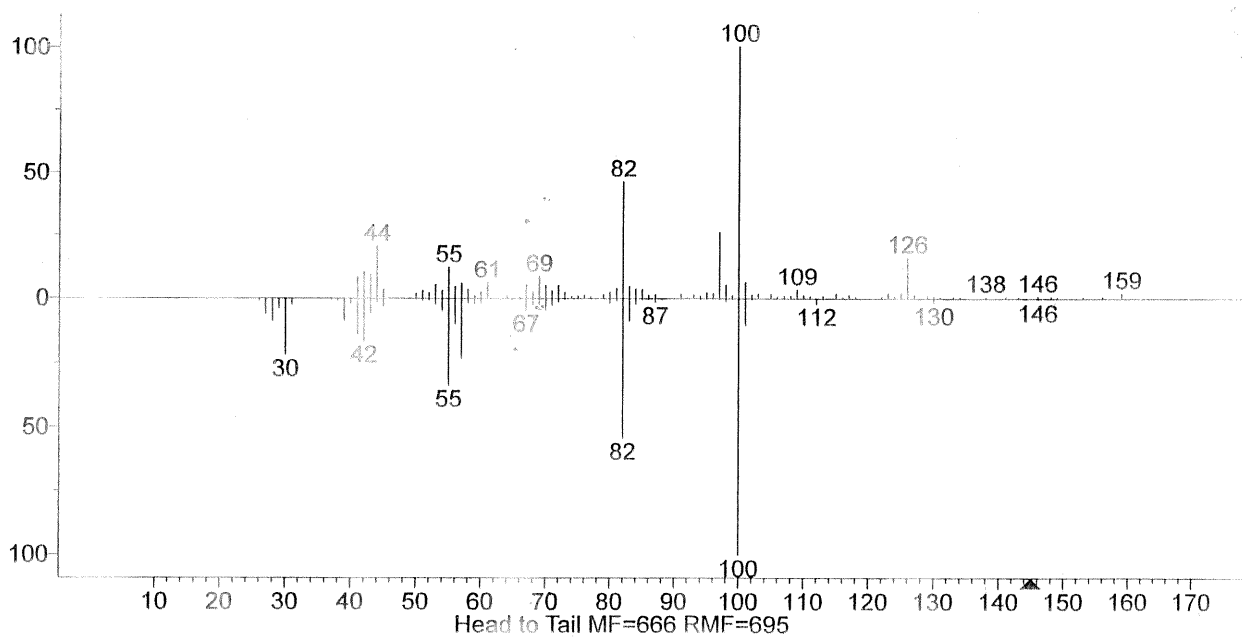

Head to Tail MF=666 RMF=695

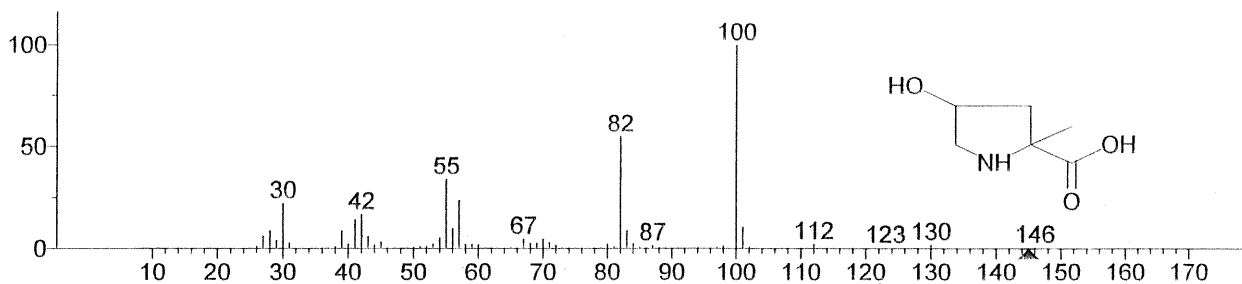

(mainlib) 4-Hydroxy-2-methylpyrrolidine-2-carboxylic acid

Name: 4-Hydroxy-2-methylpyrrolidine-2-carboxylic acid

Formula:  $C_6H_{11}NO_3$

MW: 145 NIST#: 191377 ID#: 62684 DB: mainlib

Contributor: Chemical Concepts

10 largest peaks:

100 999 | 82 543 | 55 336 | 57 233 | 30 218 | 42 164 | 41 138 | 101 104 | 56 98 | 28 87 |

Synonyms:

no synonyms.

Estimated non-polar retention index (n-alkane scale):

Value: 1424 iu

Confidence interval (Diverse functional groups): 89(50%) 382(95%) iu

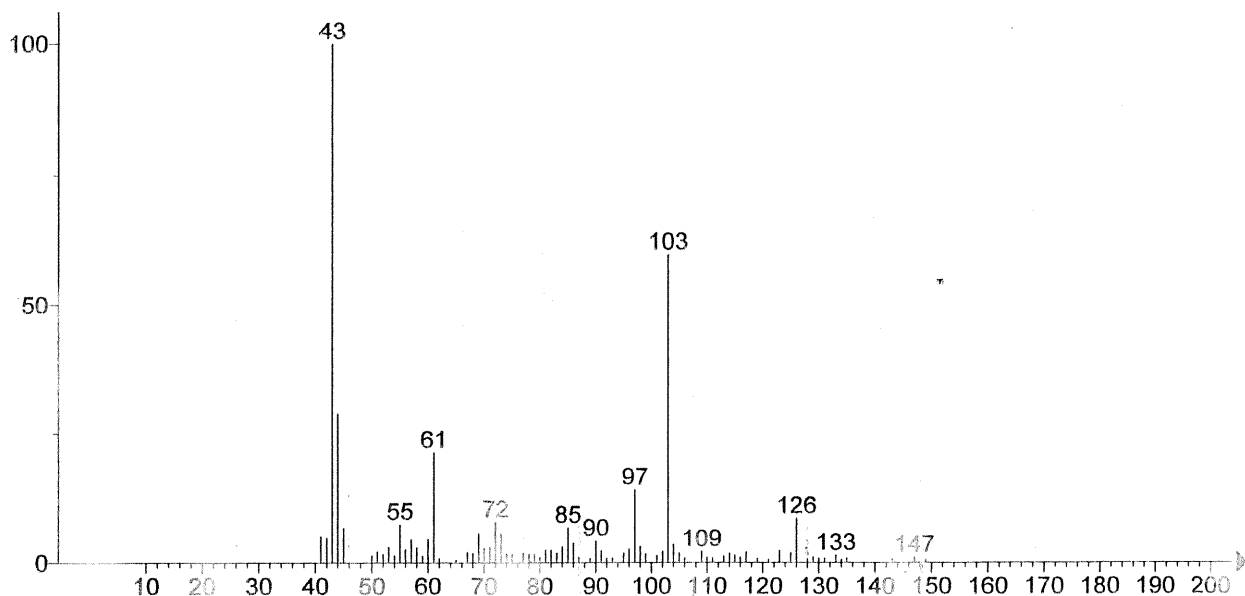

(Text File) +EI Scan (24.146 min) ALI-PIS-H1-210421.D

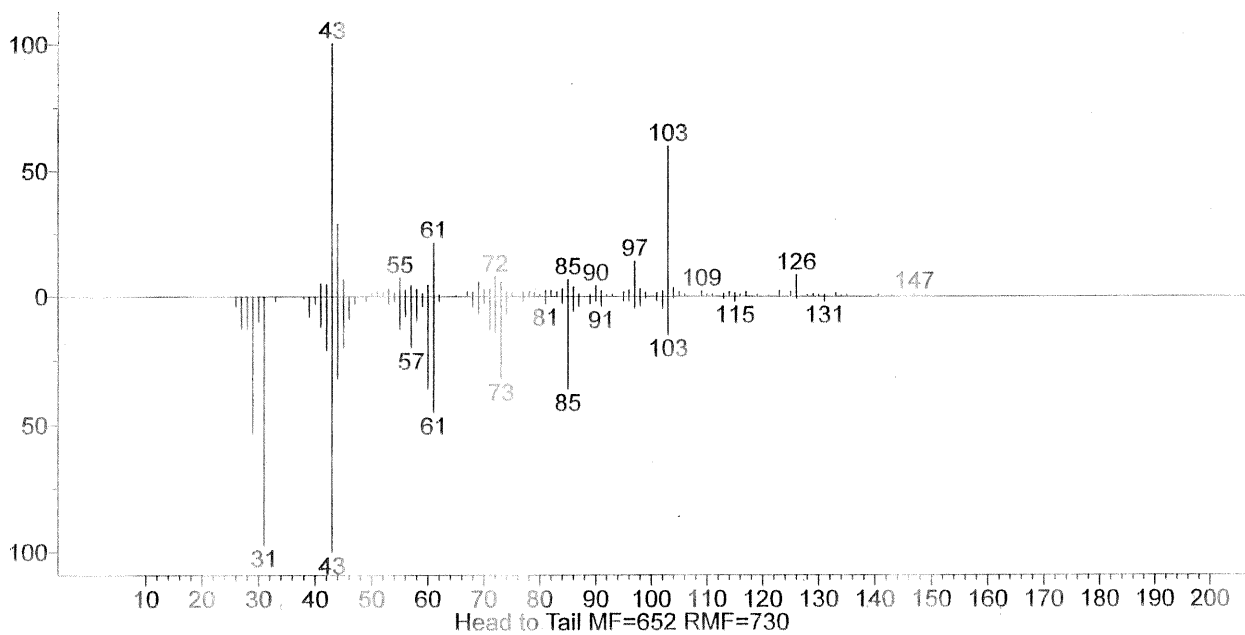

Head to Tail MF=652 RMF=730

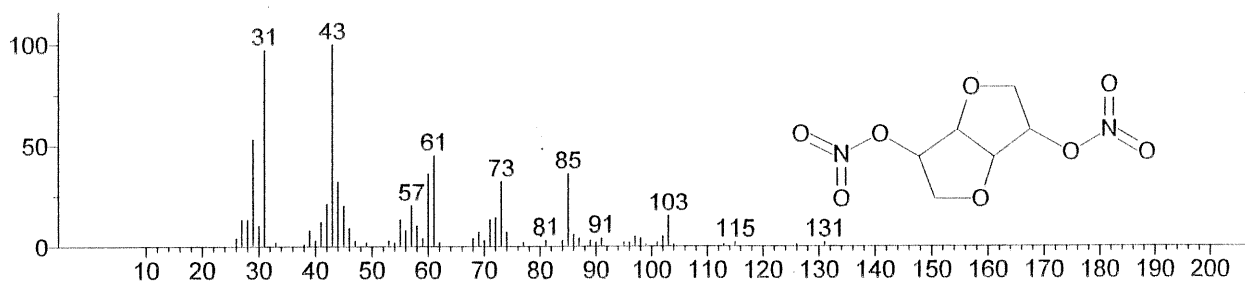

(mainlib) Isosorbide Dinitrate

Name: Isosorbide Dinitrate

Formula:  $C_6H_8N_2O_8$

MW: 236 CAS#: 87-33-2 NIST#: 298706 ID#: 5262 DB: mainlib

Other DBs: Fine, TSCA, RTECS, USP, NIH, EINECS

Contributor: R.E.Ardrey ET AL.Pharmaceutical Mass Spectra,L.,1985

10 largest peaks:

43 999 | 31 970 | 29 530 | 61 450 | 60,360 | 85 360 | 44 320 | 73 320 | 42 210 | 45 200 |

Synonyms:

- 1.D-Glucitol, 1,4:3,6-dianhydro-, dinitrate
- 2.Cardio 10
- 3.Cardis
- 4.Carvanil
- 5.Carvasin
- 6.Cedocard
- 7.Claodical
- 8.Cornilat
- 9.Coronex
- 10.Corosorbide
- 11.Dianhydrosorbitol 2,5-dinitrate
- 12.Difutrat
- 13.Dilatrate-SR
- 14.Dinitrosorbide
- 15.Emoper
- 16.Flindex
- 17.Glucitol, 1,4:3,6-dianhydro-, dinitrate, D-
- 18.Harrical
- 19.iso-Bid
- 20.Isoket
- 21.Isorbid
- 22.Isordil
- 23.Isordil Tembids
- 24.Isostat
- 25.Isotrate
- 26.IBD 20
- 27.ISD
- 28.ISDN
- 29.Korodil
- 30.Lomilan
- 31.Maycor
- 32.Myorexon
- 33.Nitrosorbid
- 34.Nitrosorbide
- 35.Nitrosorbon
- 36.Nosim
- 37.Resoidan
- 38.Rifloc Retard
- 39.Rigedal
- 40.Sorbangil
- 41.Sorbide nitrate
- 42.Sorbide T.D.
- 43.Sorbide, dinitrate
- 44.Sorbidilat
- 45.Sorbidnitrate
- 46.Sorbislo



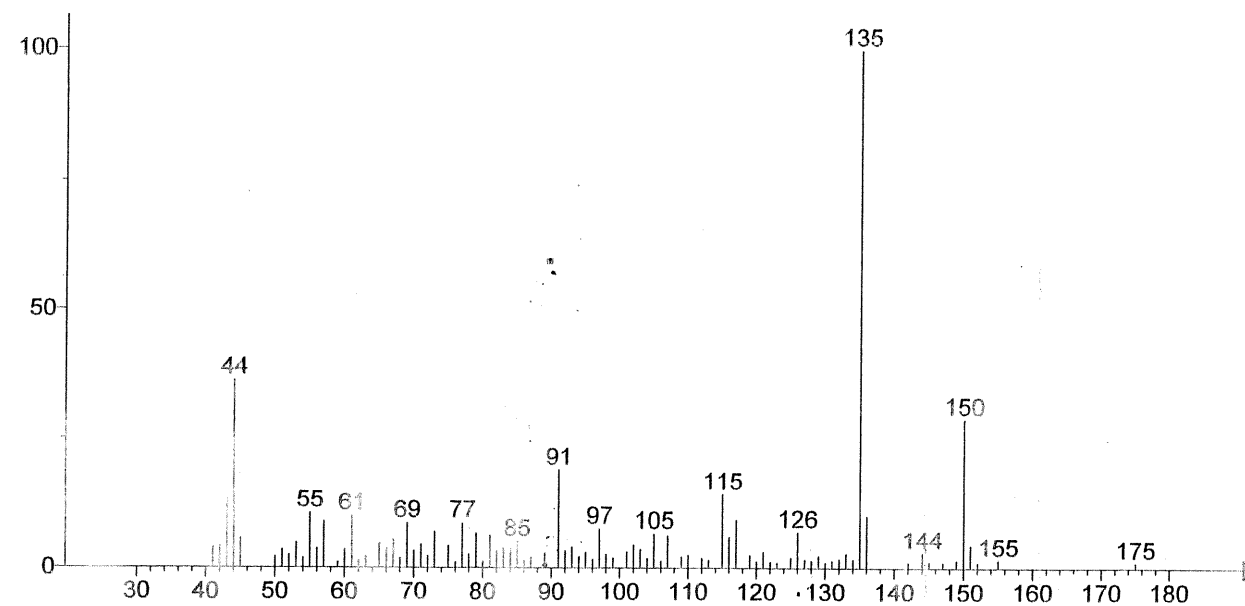

(Text File) +EI Scan (26.003 min) ALI-PIS-H1-210421.D

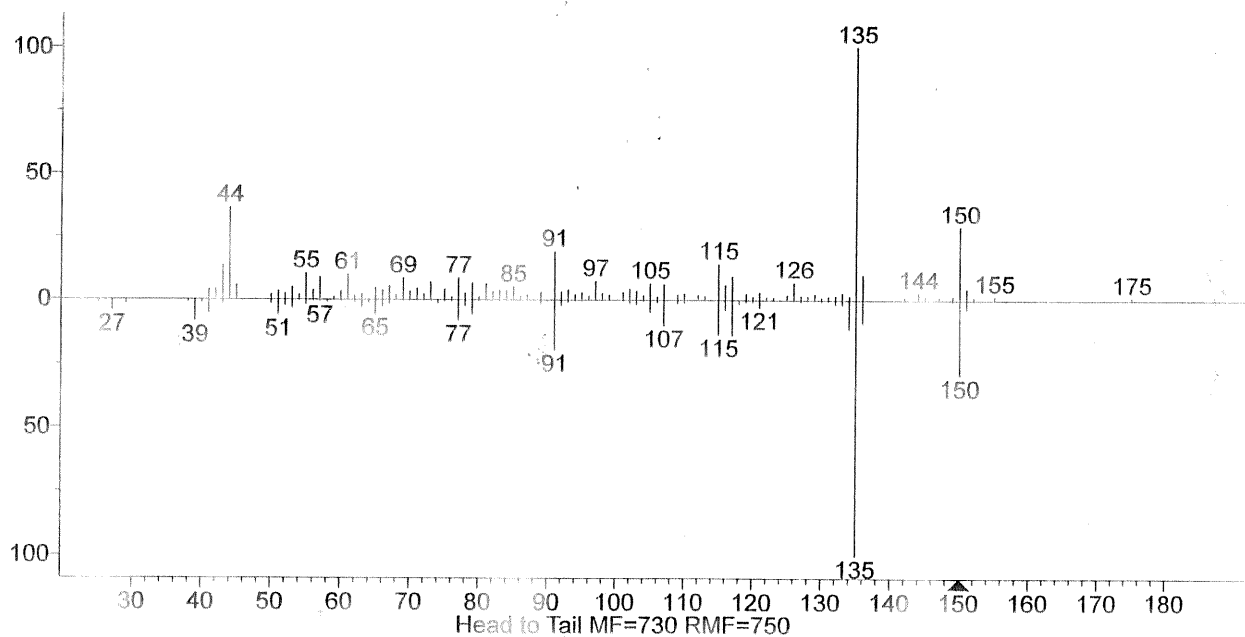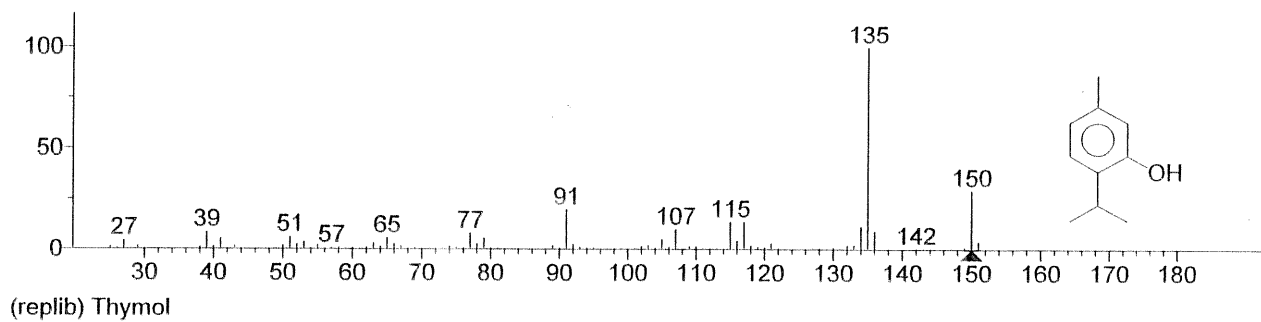

Name: Thymol

Formula: C<sub>10</sub>H<sub>14</sub>O

MW: 150 CAS#: 89-83-8 NIST#: 191399 ID#: 18428 DB: replib

Other DBs: Fine, TSCA, RTECS, USP, HODOC, NIH, EINECS

Contributor: Chemical Concepts

10 largest peaks:

135 999 | 150 291 | 91 195 | 115 134 | 117 134 | 134 113 | 107 98 | 136 89 | 39 83 | 77 79 |

Synonyms:

1. Phenol, 5-methyl-2-(1-methylethyl)-
2. p-Cymen-3-ol
3. Thyme camphor
4. 2-Isopropyl-5-methylphenol
5. 3-Hydroxy-p-cymene
6. 3-Methyl-6-isopropylphenol
7. 5-Methyl-2-isopropylphenol
8. 6-Isopropyl-m-cresol
9. 6-Isopropyl-3-methylphenol
10. m-Cresol, 6-isopropyl-
11. p-Cymene, 3-hydroxy-
12. Isopropyl cresol
13. Phenol, 2-isopropyl-5-methyl-
14. Thymic acid
15. 1-Hydroxy-5-methyl-2-isopropylbenzene
16. 1-Methyl-3-hydroxy-4-isopropylbenzene
17. 3-p-Cymenol
18. 3-Hydroxy-1-methyl-4-isopropylbenzene
19. 5-Methyl-2-isopropyl-1-phenol
20. 5-Methyl-2-(1-methylethyl)phenol
21. Isopropyl-m-cresol
22. m-Thymol

Estimated non-polar retention index (n-alkane scale):

Value: 1262 iu

Confidence interval (Phenols): 70(50%) 301(95%) iu

Retention index.

1. Value: 1266 iu

Column Type: Capillary

Column Class: Standard non-polar

Active Phase: RTX-1

Column

Length: 60 m

Carrier Gas: He

Column Diameter: 0.22 mm

Phase Thickness: 0.25 um

Data Type: Linear

RI

Program Type: Ramp

Start T: 60 C

End T: 230 C

Heat Rate: 2 K/min

End Time: 30 min

Source: Bendahou,

M.; Muselli, A.; Grignon-Dubois, M.; Benyoucef, M.; Desjobert, J.-M.; Bernardini, A.-F.; Costa, J., Antimicrobial

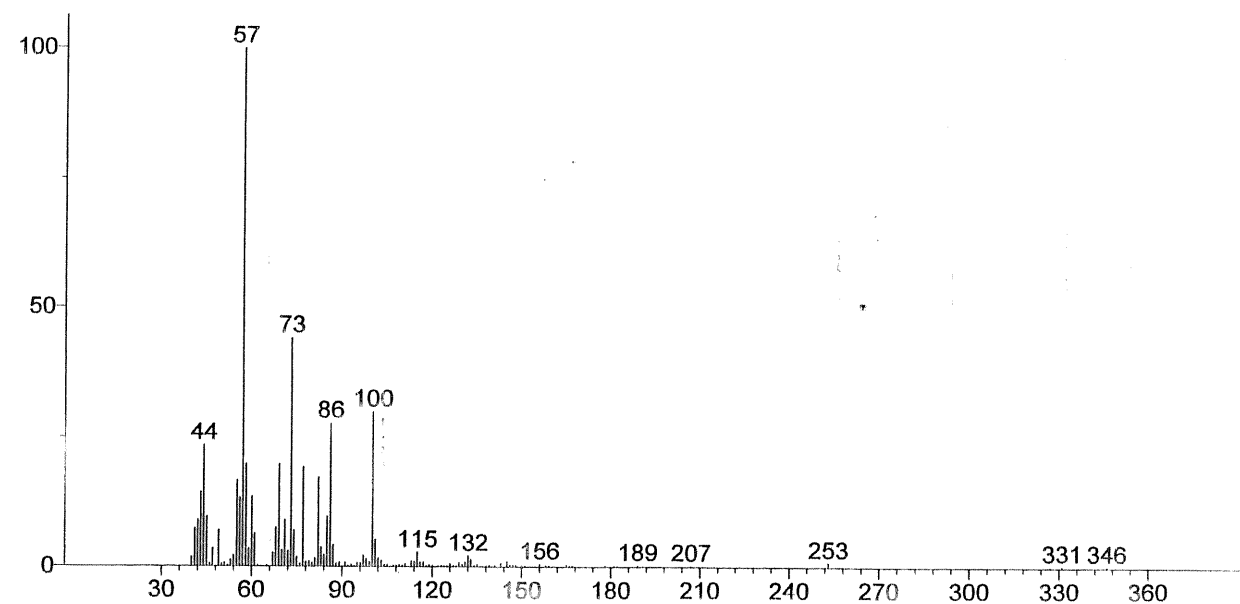

(Text File) +EI Scan (31.096 min) ALI-PIS-H1-210421.D

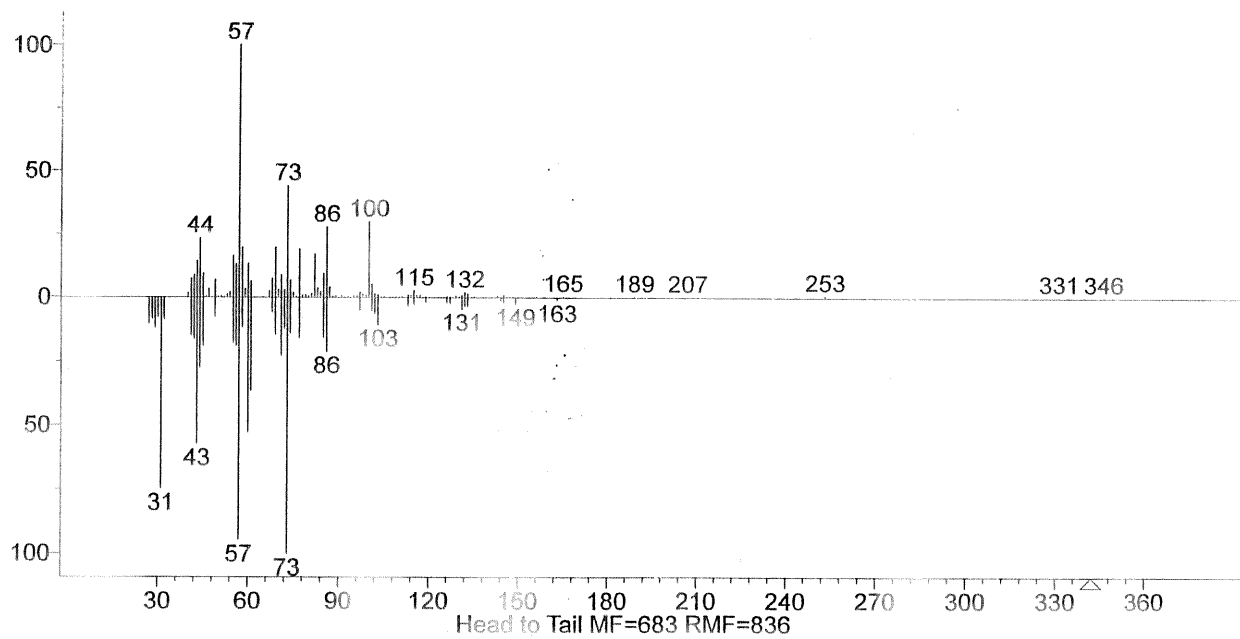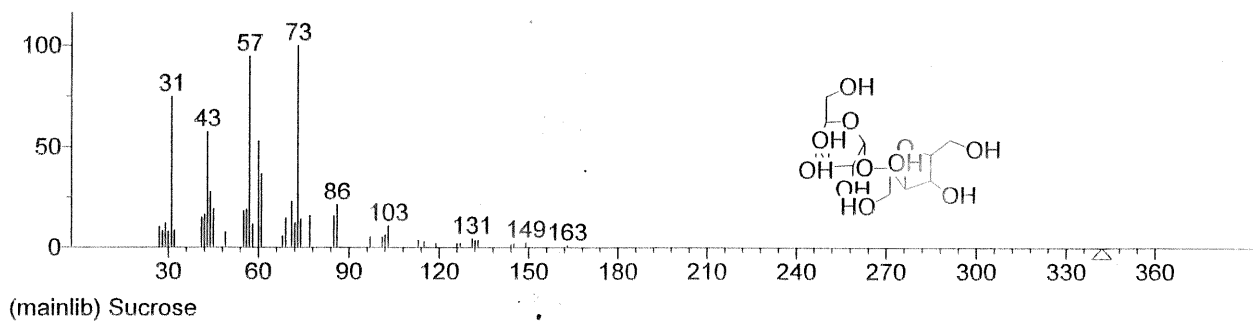

Name: Sucrose

Formula: C<sub>12</sub>H<sub>22</sub>O<sub>11</sub>

MW: 342 CAS#: 57-50-1 NIST#: 25039 ID#: 35184 DB: mainlib

Other DBs: Fine, TSCA, RTECS, USP, HODOC, NIH, EINECS

Contributor: M.I.LEVENBERG,S.L.MUELLER,ABBOTT LABS,N.CHICAGO,ILL.60064.USA

10 largest peaks:

73 999 | 57 946 | 31 746 | 43 573 | 60 528 | 61 367 | 44 276 | 71 227 | 86 212 | 45 191 |

Synonyms:

1.  $\alpha$ -D-Glucopyranoside,  $\beta$ -D-fructofuranosyl
2.  $\beta$ -D-Fructofuranosyl  $\alpha$ -D-glucopyranoside
3. Amerfond
4. Beet sugar
5. Cane sugar
6. Confectioner's sugar
7. D-Sucrose
8. Granulated sugar
9. Microse
10. Rock candy
11. Saccharose
12. Saccharum
13. Sugar
14. White sugar
15. D-(+)-Sucrose
16. D-(+)-Saccharose
17. D-(+)-Saccharose bp ph.eur
18.  $\alpha$ -D-Glucopyranosyl  $\beta$ -D-fructofuranoside
19.  $\beta$ -D-Fructofuranoside,  $\alpha$ -D-glucopyranosyl
20. ( $\alpha$ -D-Glucosido)- $\beta$ -D-fructofuranoside
21. Fructofuranoside,  $\alpha$ -D-glucopyranosyl,  $\beta$ -D
22. Glucopyranoside,  $\beta$ -D-fructofuranosyl,  $\alpha$ -D
23. NCI-C56597
24. White sugar Enovit M
25. Sugartab
26. Table sugar
27. Hex-2-ulofuranosyl hexopyranoside #

Estimated non-polar retention index (n-alkane scale):

Value: 3139 iu

Confidence interval (Diverse functional groups): 89(50%) 382(95%) iu

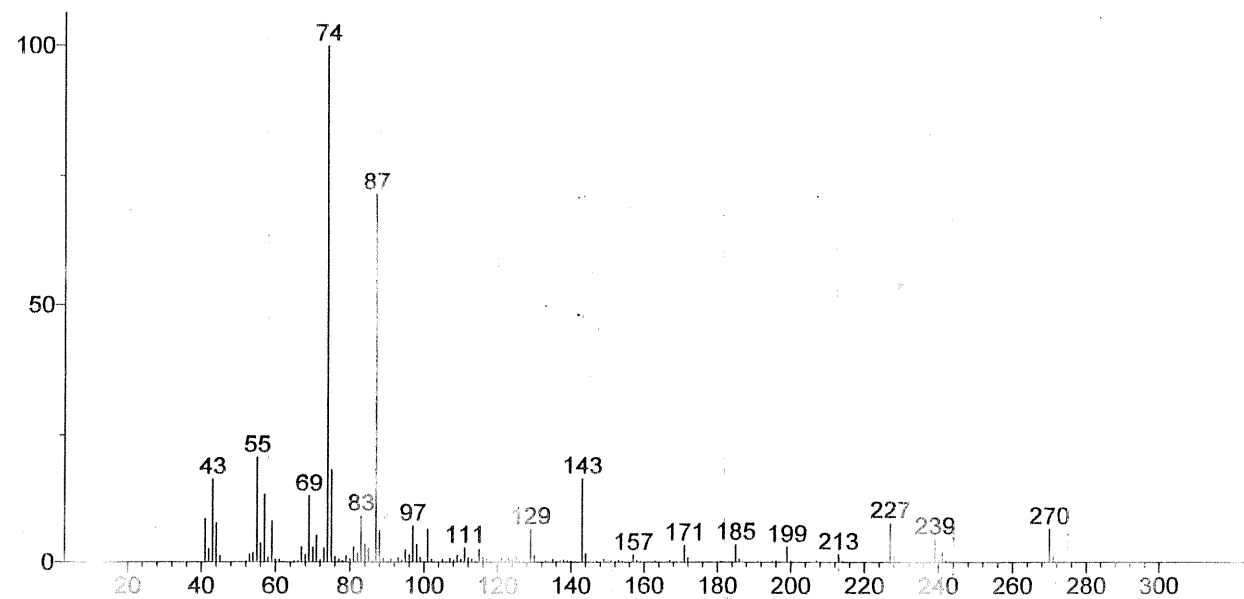

(Text File) +EI Scan (46.159 min) ALI-PIS-H1-210421.D

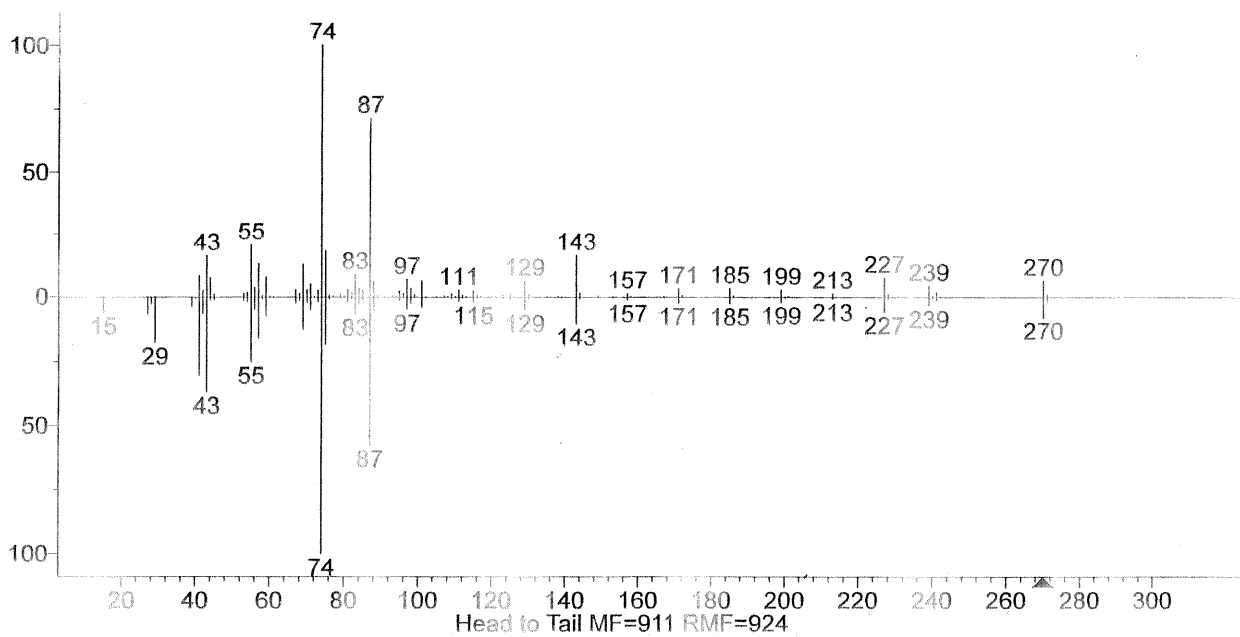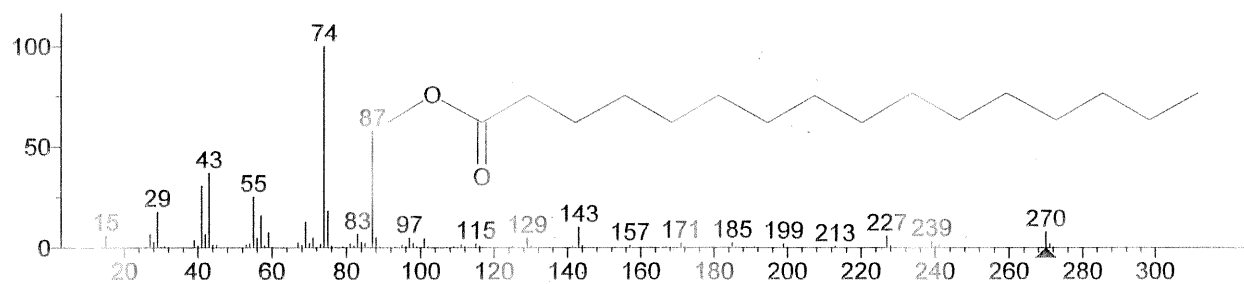

(replib) Hexadecanoic acid, methyl ester

Name: Hexadecanoic acid, methyl ester

Formula: C<sub>17</sub>H<sub>34</sub>O<sub>2</sub>

MW: 270 CAS#: 112-39-0 NIST#: 79124 ID#: 9050 DB: replib

Other DBs: Fine, TSCA, EPA, HODOC, NIH, EINECS

Contributor: O A MAMER, MCGILL UNIVERSITY, MONTREAL, CANADA

10 largest peaks:

74 999 | 87 575 | 43 368 | 41 304 | 55 251 | 75 183 | 29 177 | 57 159 | 69 127 | 143 102 |

Synonyms:

1. Palmitic acid, methyl ester
2. n-Hexadecanoic acid methyl ester
3. Metholene 2216
4. Methyl hexadecanoate
5. Methyl n-hexadecanoate
6. Methyl palmitate
7. Uniphath A60
8. Emery 2216
9. Radia 7120

Estimated non-polar retention index (n-alkane scale):

Value: 1878 iu

Confidence interval (Esters): 47(50%) 201(95%) iu

Retention index.

1. Value: 1908 iu

Column Type: Capillary

Column Class: Standard non-polar

Active Phase: SPB-1

Column

Length: 30 m

Carrier Gas: He

Column Diameter: 0.25 mm

Phase Thickness: 0.25 µm

Data Type: Linear

RI

Program Type: Ramp

Start T: 50 C

End T: 250 C

Heat Rate: 5 K/min

Start Time: 3 min

End Time: 15

min

Source: Blagojevic, P.; Radulovic, N.; Palic, R.; Stojanovic, G., Chemical composition of the essential oils of Serbian wild-growing *Artemisia absinthium* and *Artemisia vulgaris*, J. Agric. Food Chem., 54, 2006, 4780-4789.

2.

Value: 1909 iu

Column Type: Capillary

Column Class: Standard non-polar

Active Phase: SPB-1

Column Length:

30 m

Carrier Gas: He

Column Diameter: 0.25 mm

Phase Thickness: 0.25 µm

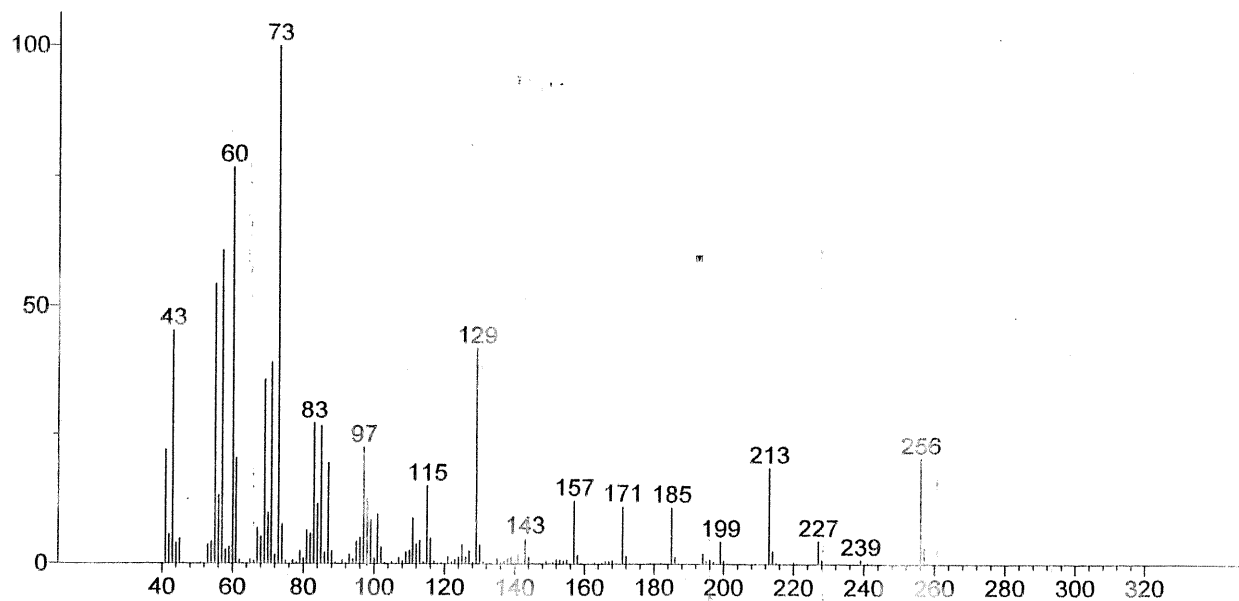

(Text File) +EI Scan (47.948 min) ALI-PIS-H1-210421.D

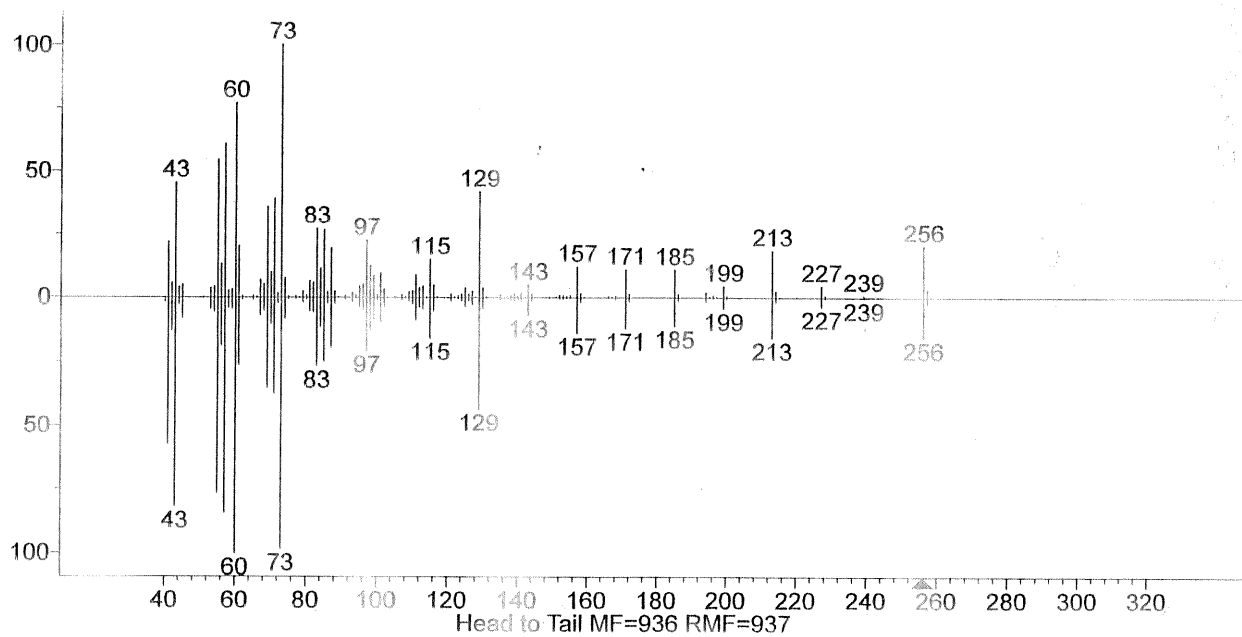

Head to Tail MF=936 RMF=937

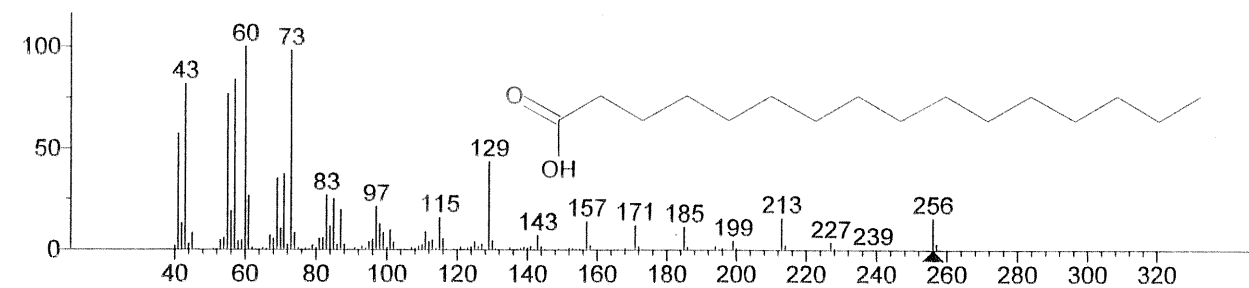

(replib) n-Hexadecanoic acid

Name: n-Hexadecanoic acid

Formula: C<sub>16</sub>H<sub>32</sub>O<sub>2</sub>

MW: 256 CAS#: 57-10-3 NIST#: 335494 ID#: 6723 DB: replib

Other DBs: Fine, TSCA, RTECS, EPA, HODOC, NIH, EINECS, IRDB

Contributor: Drug Lab

10 largest peaks:

60 999 | 73 980 | 57 840 | 43 817 | 55 767 | 41 574 | 129 435 | 71 373 | 69 351 | 83 267 |

Synonyms:

- 1.Hexadecanoic acid
- 2.n-Hexadecoic acid
- 3.Palmitic acid
- 4.Pentadecanecarboxylic acid
- 5.1-Pentadecanecarboxylic acid
- 6.Cetylic acid
- 7.Emersol 140
- 8.Emersol 143
- 9.Hexadecylic acid
- 10.Hydrofol
- 11.Hystrene 8016
- 12.Hystrene 9016
- 13.Industrene 4516
- 14.Prifrac 2960
- 15.Glycon P-45
- 16.Prifac 2960
- 17.Univol U332

Estimated non-polar retention index (n-alkane scale):

Value: 1968 iu

Confidence interval (Carboxylic acids): 51(50%) 220(95%) iu

Retention index.

1. Value: 1942 iu

Column Type: Capillary

Column Class: Standard non-polar

Active Phase: RTX-1

Column

Length: 60 m

Carrier Gas: He

Column Diameter: 0.22 mm

Phase Thickness: 0.25 µm

Data Type: Linear

RI

Program Type: Ramp

Start T: 60 C

End T: 230 C

Heat Rate: 2 K/min

End Time: 35 min

Source: Paolini, J.;

Muselli, A.; Bernardini, A.-F.; Bighelli, A.; Casanova, J.; Costa, J., Thymol derivatives from essential oil of *Doronicum corsicum* L., *Flavour Fragr. J.*, 22, 2007, 479-487.

2. Value: 1972 iu

Column Type: Capillary

Column



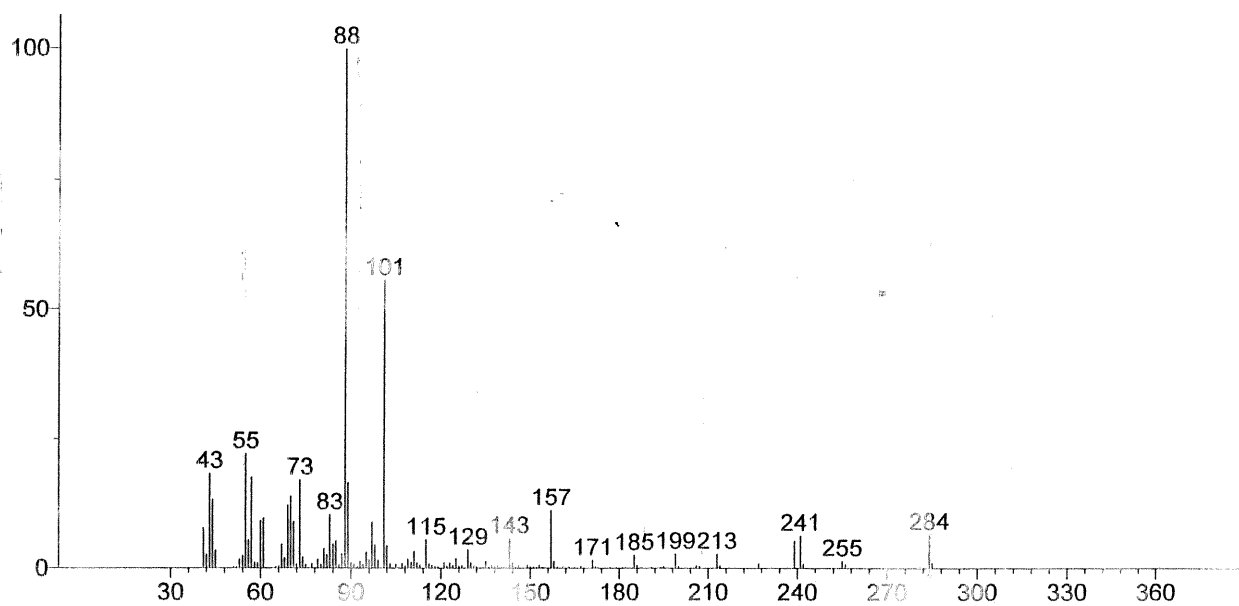

(Text File) +EI Scan (49.527 min) ALI-PIS-H1-210421.D

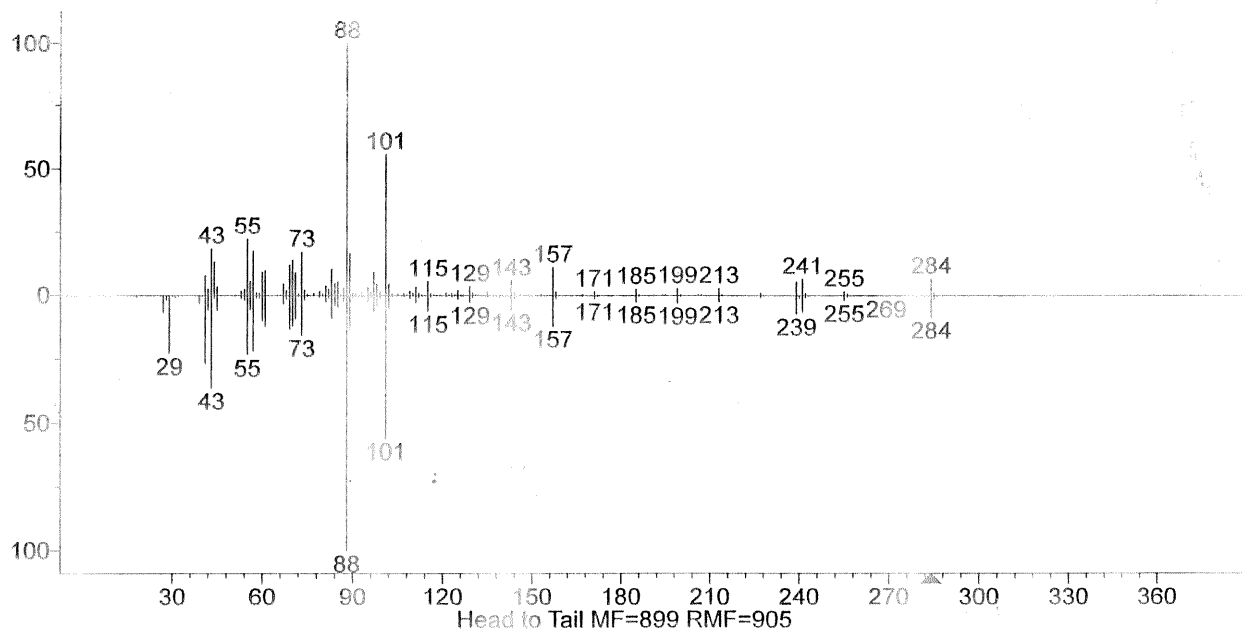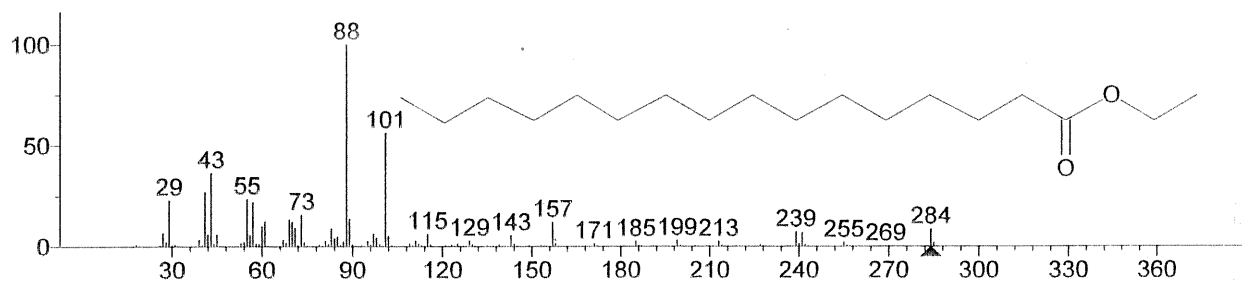

(mainlib) Hexadecanoic acid, ethyl ester

Name: Hexadecanoic acid, ethyl ester

Formula: C<sub>18</sub>H<sub>36</sub>O<sub>2</sub>

MW: 284 CAS#: 628-97-7 NIST#: 233204 ID#: 49485 DB: mainlib

Other DBs: Fine, TSCA, EPA, HODOC, NIH, EINECS, IRDB

Contributor: Japan AIST/NIMC Database- Spectrum MS-NW-5396

10 largest peaks:

88 999 | 101 559 | 43 362 | 41 268 | 55 233 | 29 227 | 57 217 | 73 156 | 89 136 | 69 132 |

Synonyms:

1. Palmitic acid, ethyl ester

2. Ethyl hexadecanoate

3. Ethyl palmitate

Estimated non-polar retention index (n-alkane scale):

Value: 1978 iu

Confidence interval (Esters): 47(50%) 201(95%) iu

Retention index.

1. Value: 1968 iu

Column Type: Capillary

Column Class: Standard non-polar

Active Phase: SPB-1

Column

Length: 30 m

Carrier Gas: He

Column Diameter: 0.25 mm

Phase Thickness: 0.25 µm

Data Type: Linear

RI

Program Type: Ramp

Start T: 50 C

End T: 250 C

Heat Rate: 5 K/min

Start Time: 3 min

End Time: 15

min

Source: Blagojevic, P.; Radulovic, N.; Palic, R.; Stojanovic, G., Chemical composition of the essential oils of Serbian wild-growing *Srtemisia absinthium* and *Artemisia vulgaris*, J. Agric. Food Chem., 54, 2006, 4780-4789.

2.

Value: 1966 iu

Column Type: Capillary

Column Class: Standard non-polar

Active Phase: HP-1

Column Length:

50 m

Carrier Gas: He

Column Diameter: 0.2 mm

Phase Thickness: 0.33 µm

Data Type: Linear RI

Program

Type: Ramp

Start T: 60 C

End T: 250 C

Heat Rate: 2 K/min

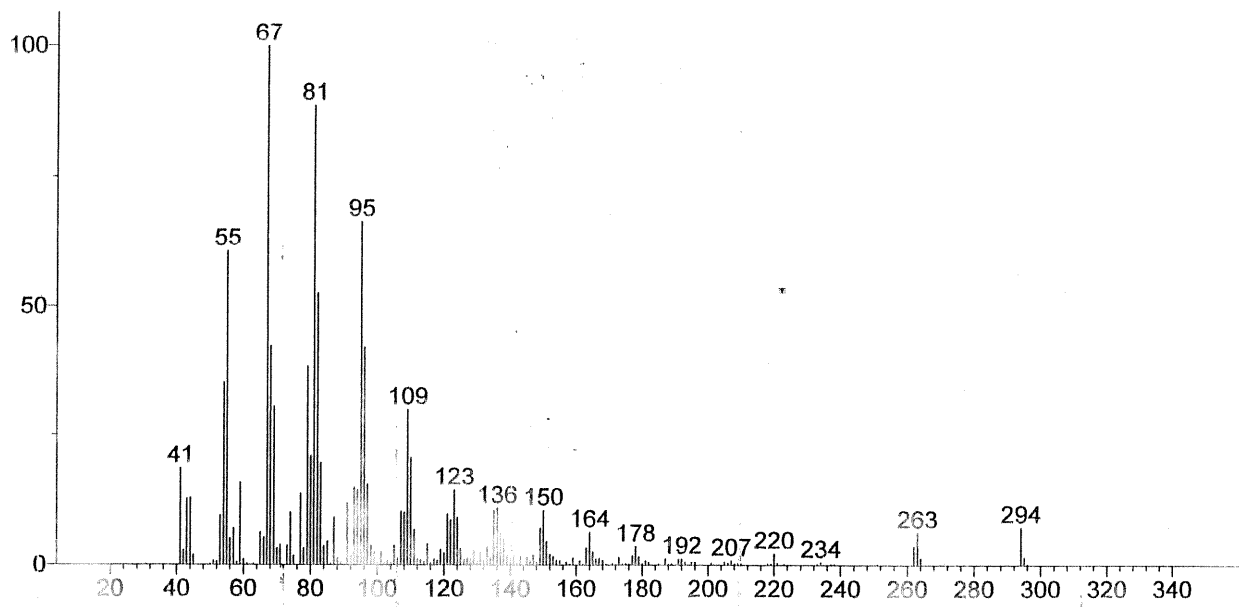

(Text File) +EI Scan (56.187 min) ALI-PIS-H1-210421.D

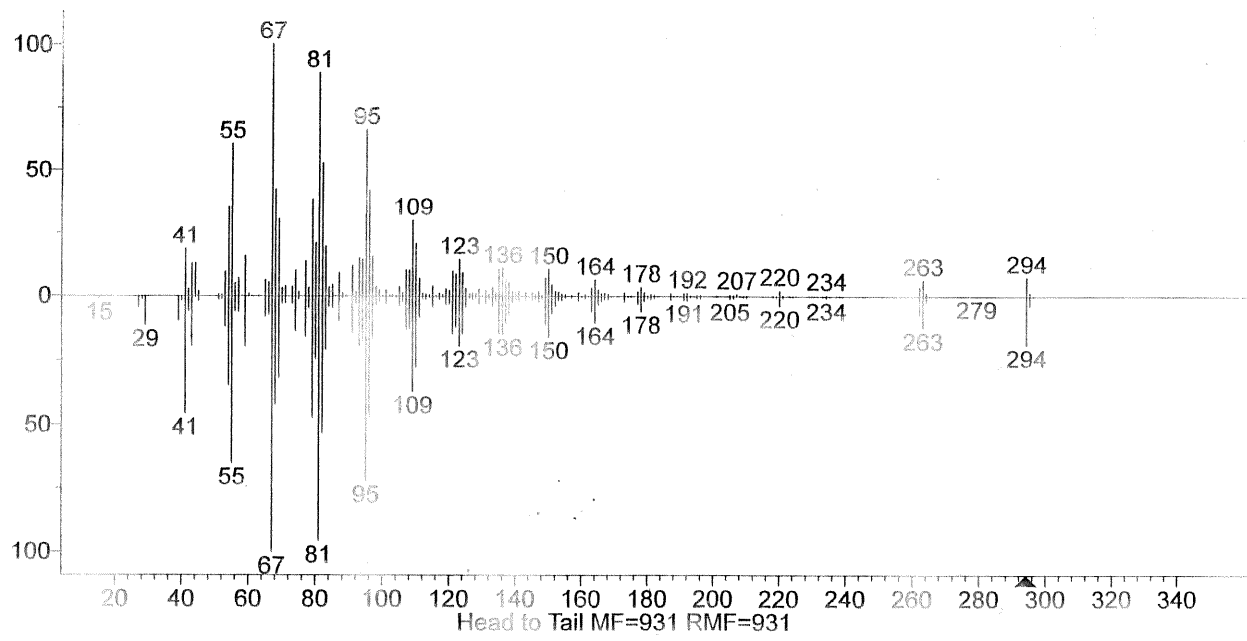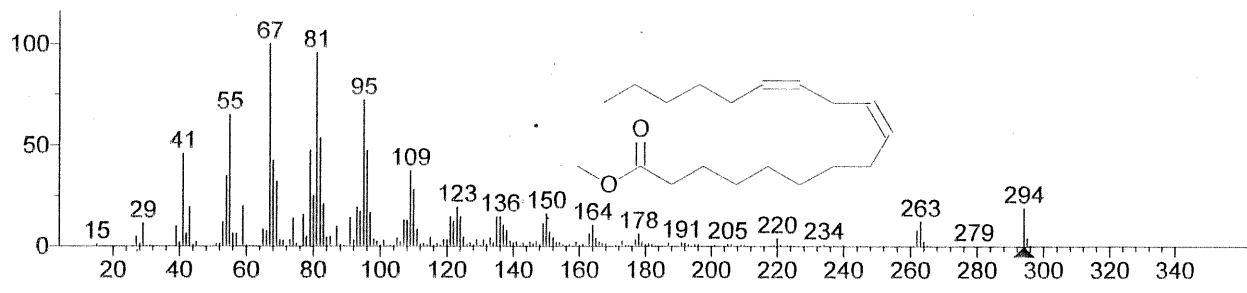

(mainlib) 9,12-Octadecadienoic acid (Z,Z)-, methyl ester

Name: 9,12-Octadecadienoic acid (Z,Z)-, methyl ester

Formula: C<sub>19</sub>H<sub>34</sub>O<sub>2</sub>

MW: 294 CAS#: 112-63-0 NIST#: 333205 ID#: 28886 DB: mainlib

Other DBs: Fine, TSCA, EPA, HODOC, NIH, EINECS

Contributor: NIST Mass Spectrometry Data Center

10 largest peaks:

67 999 | 81 956 | 95 720 | 55 650 | 82 534 | 79 474 | 96 472 | 41 456 | 68 423 | 109 372 |

Synonyms:

1. Linoleic acid, methyl ester

2. Methyl cis,cis-9,12-octadecadienoate

3. Methyl linoleate

4. Methyl octadecadienoate

5. Methyl 9-cis,12-cis-octadecadienoate

6. Methyl (9Z,12Z)-9,12-octadecadienoate #

Estimated non-polar retention index (n-alkane scale):

Value: 2093 iu

Confidence interval (Esters): 47(50%) 201(95%) iu

Retention index.

1. Value: 2071 iu

Column Type: Capillary

Column Class: Standard non-polar

Active Phase: SPB-1

Column

Length: 30 m

Carrier Gas: He

Column Diameter: 0.25 mm

Phase Thickness: 0.25 µm

Data Type: Linear

RI

Program Type: Ramp

Start T: 50 C

End T: 250 C

Heat Rate: 5 K/min

Start Time: 3 min

End Time: 15

min

Source: Blagojevic, P.; Radulovic, N.; Palic, R.; Stojanovic, G., Chemical composition of the essential oils of Serbian wild-growing *Artemisia absinthium* and *Artemisia vulgaris*, J. Agric. Food Chem., 54, 2006, 4780-4789.

2.

Value: 2087 iu

Column Type: Capillary

Column Class: Standard non-polar

Active Phase: BP-1

Column Length:

30 m

Carrier Gas: N<sub>2</sub>

Column Diameter: 0.32 mm

Phase Thickness: 0.25 µm

Data Type: Linear RI

Program

Type: Ramp

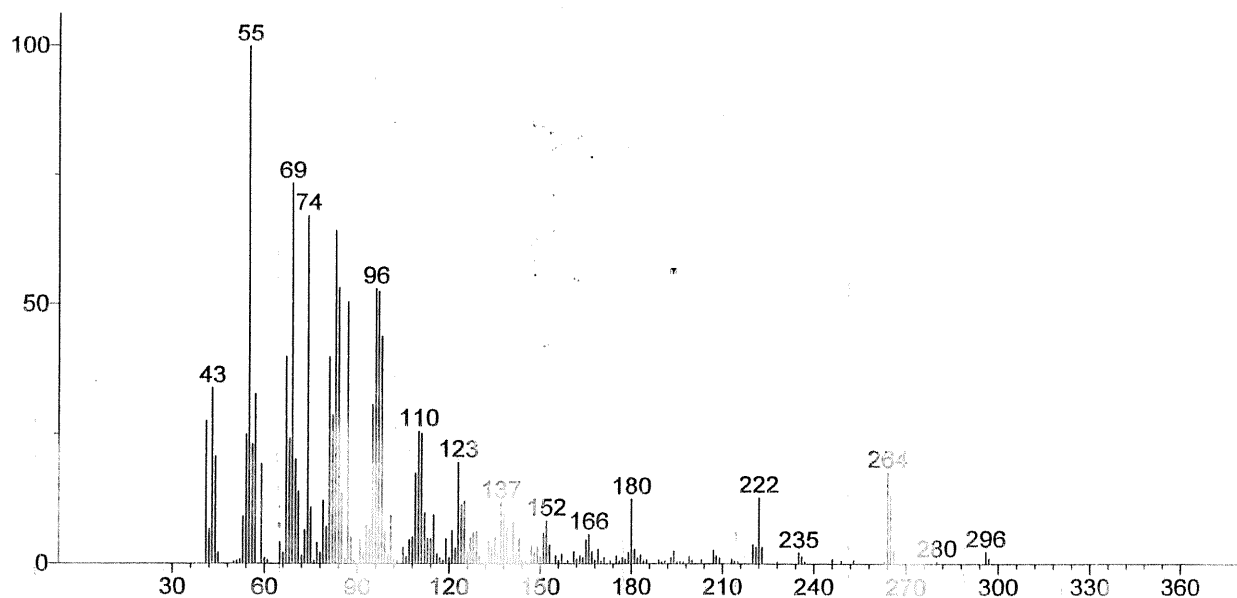

(Text File) +EI Scan (56.654 min) ALI-PIS-H1-210421.D

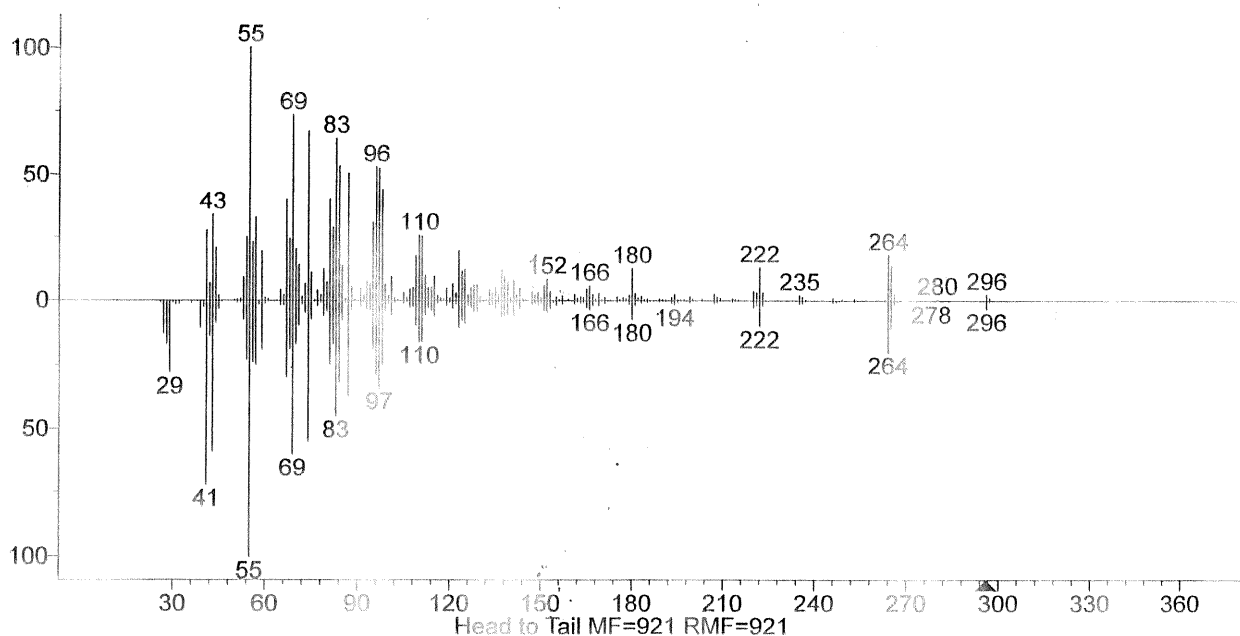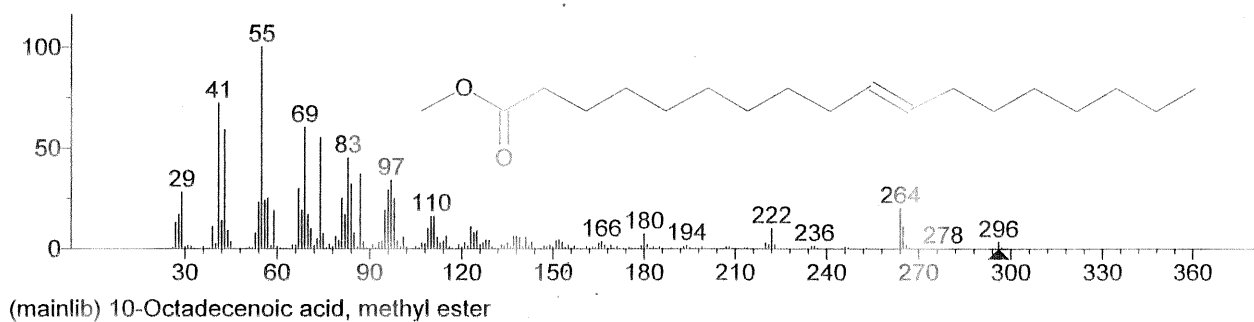

Name: 10-Octadecenoic acid, methyl ester

Formula:  $C_{19}H_{36}O_2$

MW: 296 CAS#: 13481-95-3 NIST#: 36207 ID#: 17521 DB: mainlib

Other DBs: None

Contributor: R.T.HOLMAN, UNIVERSITY OF MINNESOTA

10 largest peaks:

55 999 | 41 720 | 69 600 | 43 590 | 74 550 | 83 450 | 87 370 | 97 340 | 84 320 | 67 300 |

Synonyms:

1.Methyl (10E)-10-octadecenoate #

Estimated non-polar retention index (n-alkane scale):

Value: 2085 iu

Confidence interval (Esters): 47(50%) 201(95%) iu

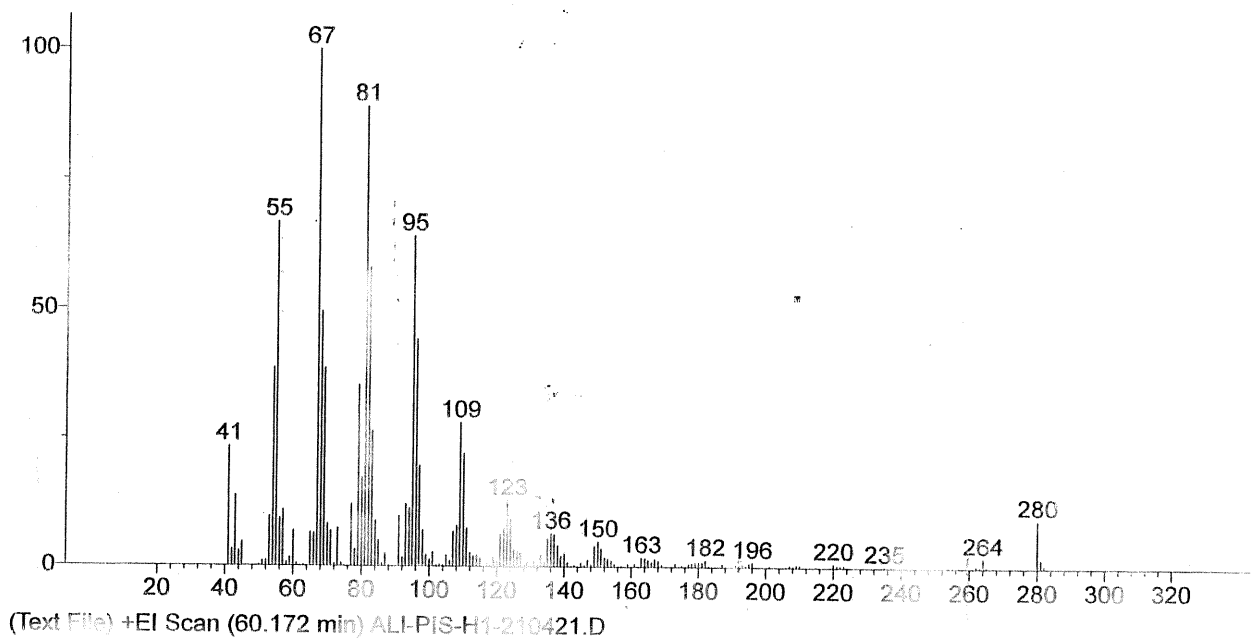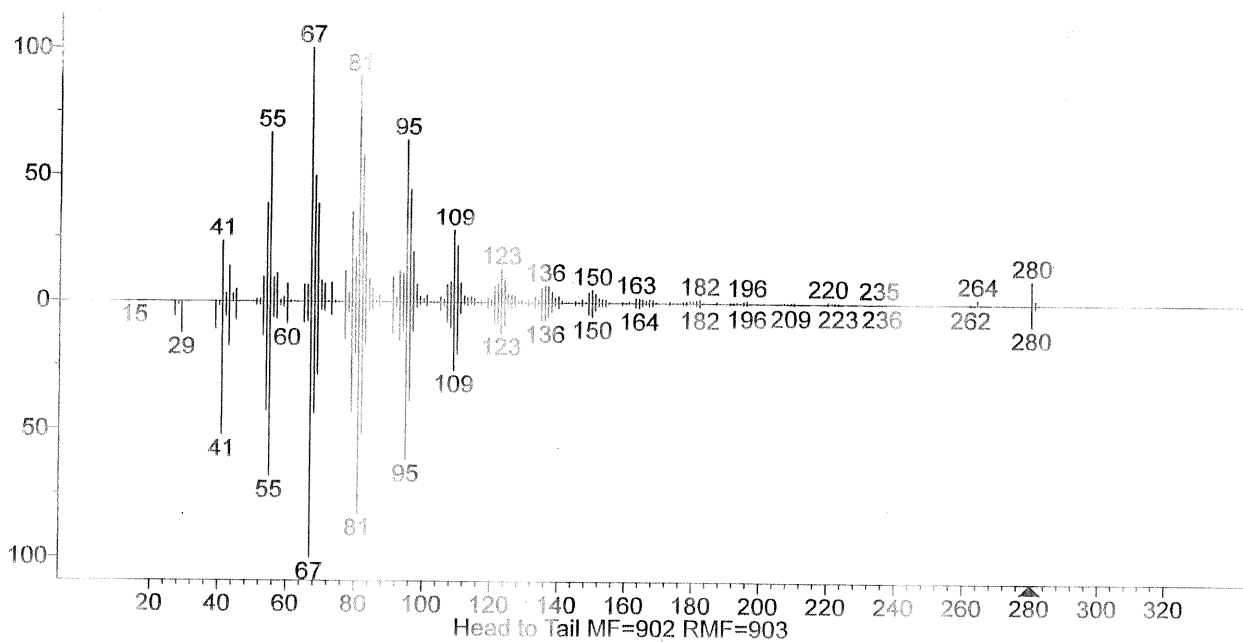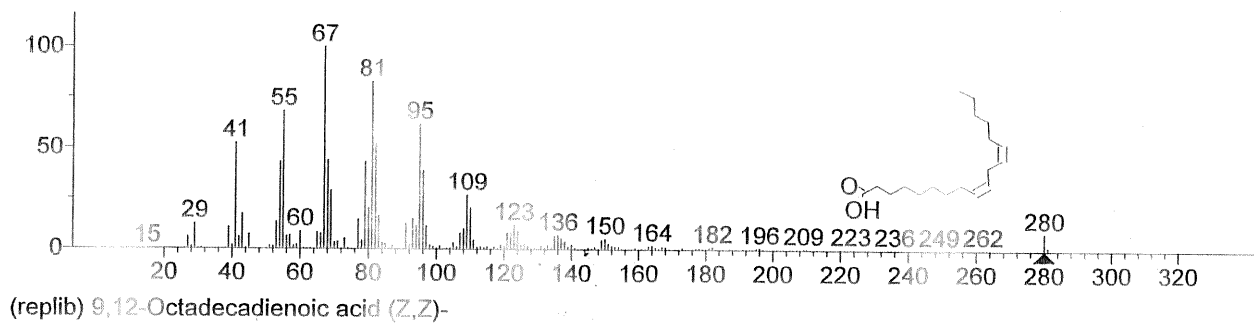

Name: 9,12-Octadecadienoic acid (Z,Z)-

Formula: C<sub>18</sub>H<sub>32</sub>O<sub>2</sub>

MW: 280 CAS#: 60-33-3 NIST#: 333207 ID#: 7212 DB: replib

Other DBs: Fine, TSCA, RTECS, HODOC, NIH, EINECS

Contributor: NIST Mass Spectrometry Data Center

10 largest peaks:

67 999 | 81 827 | 55 680 | 95 617 | 41 523 | 82 516 | 68 437 | 79 430 | 54 429 | 96 388 |

Synonyms:

1. cis-9,cis-12-Octadecadienoic acid
2. cis,cis-Linoleic acid
3. Grape seed oil
4. Linoleic
5. Linoleic acid
6. Linolic acid
7. Polylin No. 515
8. Telfairic acid
9. Unifac 6550
10. 9,12-Octadecadienoic acid
11. Leinoleic acid
12. 9,12-Linoleic acid
13. cis,cis-9,12-octadecadienoic acid
14. Linoelaidic acid
15. Linoleic acid 95
16. Emersol 310
17. Emersol 315
18. *Vespula pensylvanica* b708568k063
19. Pamolyn
20. Pamolyn 125
21. Pamolyn 200, 240
22. Pamolyn 380

Estimated non-polar retention index (n-alkane scale):

Value: 2183 iu

Confidence interval (Carboxylic acids): 51(50%) 220(95%) iu

Retention index.

1. Value: 2095 iu

Column Type: Capillary

Column Class: Standard non-polar

Active Phase: CP Sil 5 CB

Column

Length: 25 m

Carrier Gas: H<sub>2</sub>

Column Diameter: 0.25 mm

Data Type: Linear RI

Program Type: Ramp

Start T:

80 C

End T: 270 C

Heat Rate: 10 K/min

Source: Ziegenbein, F.C.; Hanssen, H.-P.; König, W.A., Secondary metabolites from *Ganoderma lucidum* and *Spongiporus leucomallellus*, *Phytochemistry*, 67, 2006, 202-211.

2.



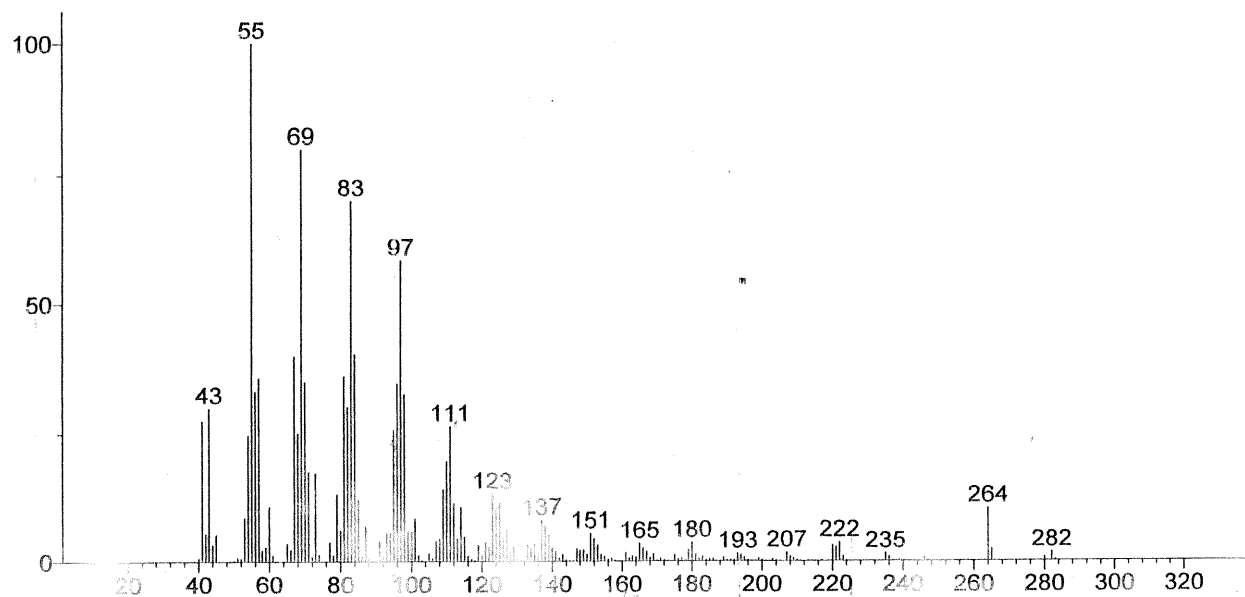

(Text File) +El Scan (60.678 min) ALI-PIS-H1-210421.D

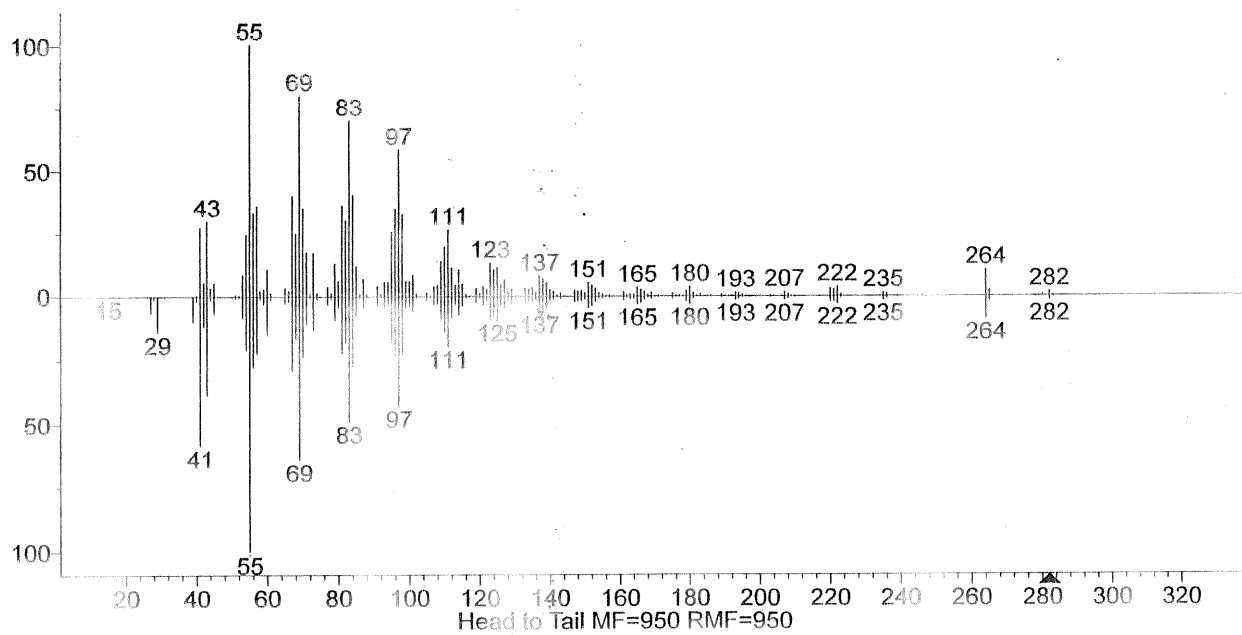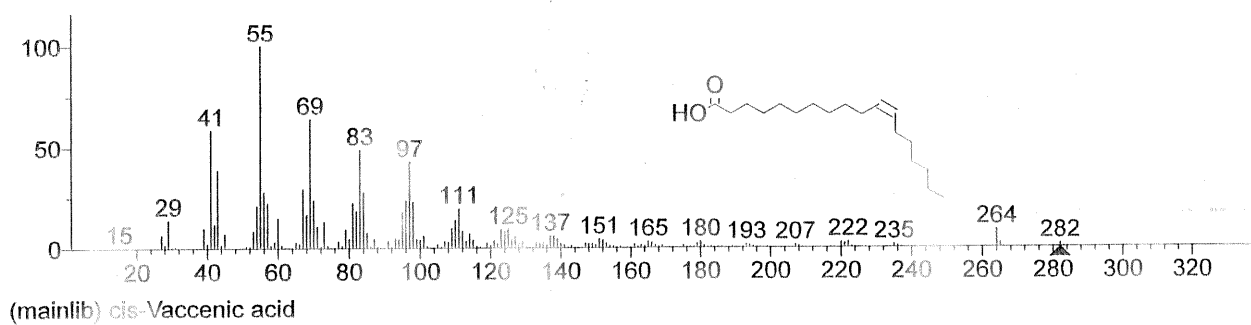

Name: cis-Vaccenic acid

Formula: C<sub>18</sub>H<sub>34</sub>O<sub>2</sub>

MW: 282 CAS#: 506-17-2 NIST#: 333599 ID#: 18204 DB: mainlib

Other DBs: None

Contributor: NIST Mass Spectrometry Data Center

10 largest peaks:

55 999 | 69 638 | 41 583 | 83 487 | 97 426 | 43 386 | 67 290 | 56 276 | 84 273 | 70 237 |

Synonyms:

no synonyms.

Estimated non-polar retention index (n-alkane scale):

Value: 2175 iu

Confidence interval (Carboxylic acids): 51(50%) 220(95%) iu

Retention index.

1. Value: 2116.6 iu

Column Type: Capillary

Column Class: Semi-standard non-polar

Active Phase: VF

-5MS

Column Length: 30 m

Carrier Gas: He

Column Diameter: 0.25 mm

Phase Thickness: 0.25 um

Data Type:

Linear RI

Program Type: Ramp

Start T: 60 C

End T: 270 C

Source: Tret'yakov, K.V., Retention Data. NIST

Mass Spectrometry Data Center., 2007.

2. Value: 2161.8 iu

Column Type: Capillary

Column Class: Semi

-standard non-polar

Active Phase: VF-5MS

Column Length: 30 m

Carrier Gas: He

Column Diameter: 0.25

mm

Phase Thickness: 0.25 um

Data Type: Linear RI

Program Type: Ramp

Start T: 60 C

End T: 270

C

Source: Tret'yakov, K.V., Retention Data. NIST Mass Spectrometry Data Center., 2007.

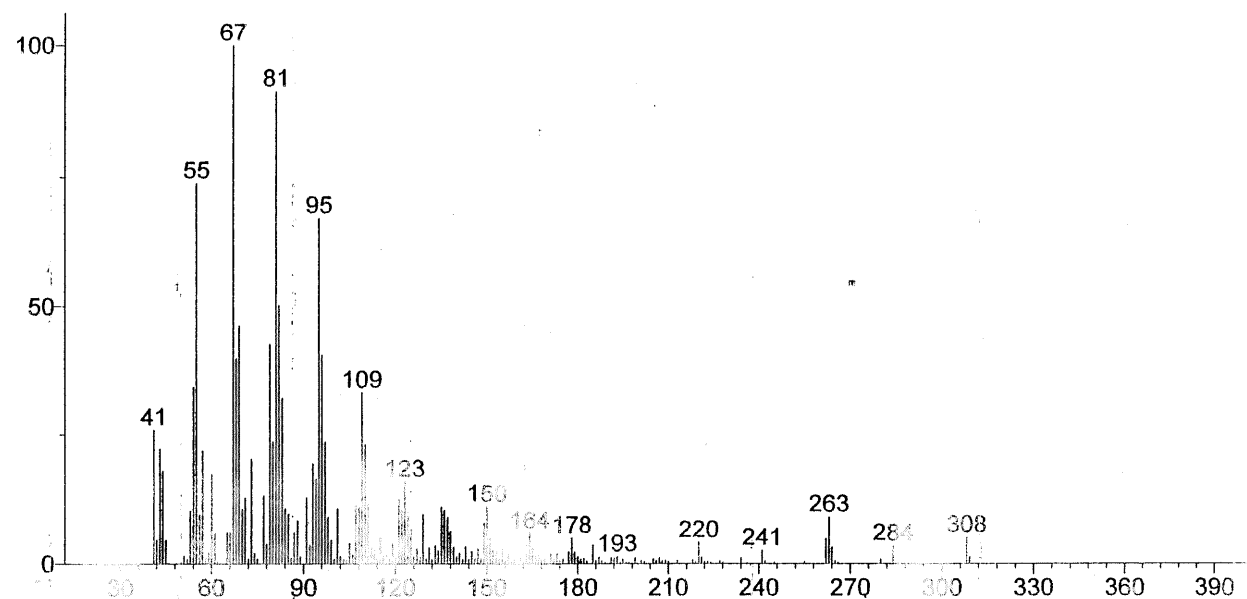

(Text File) +EI Scan (62.025 min) ALI-PIS-H1-210421.D

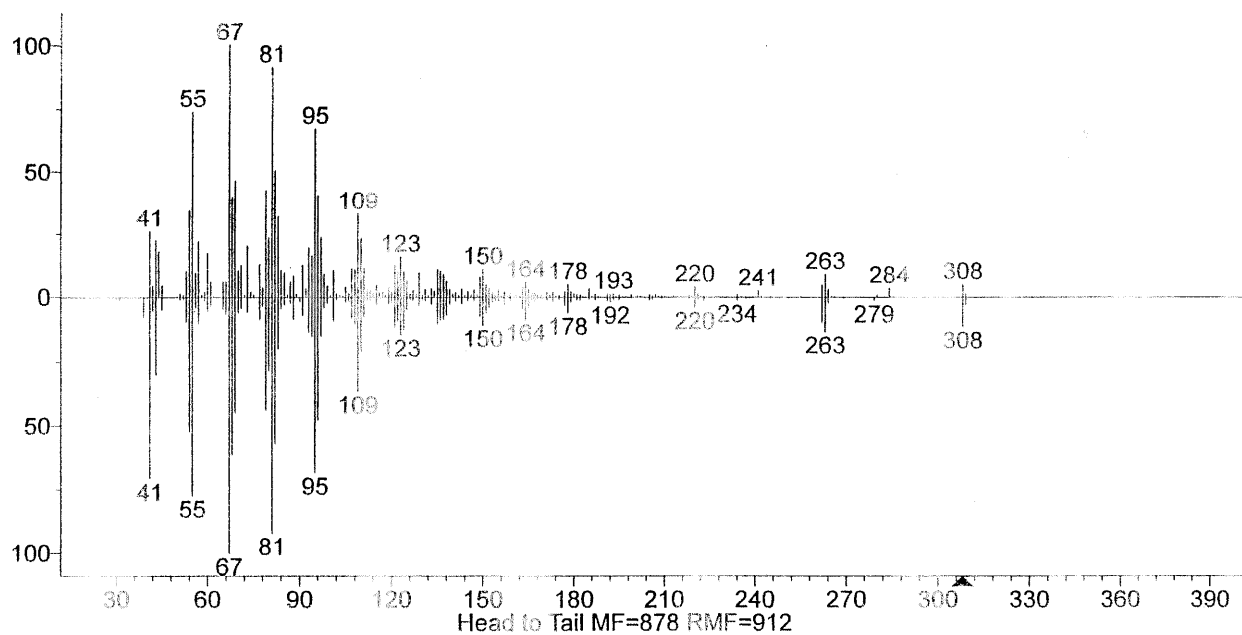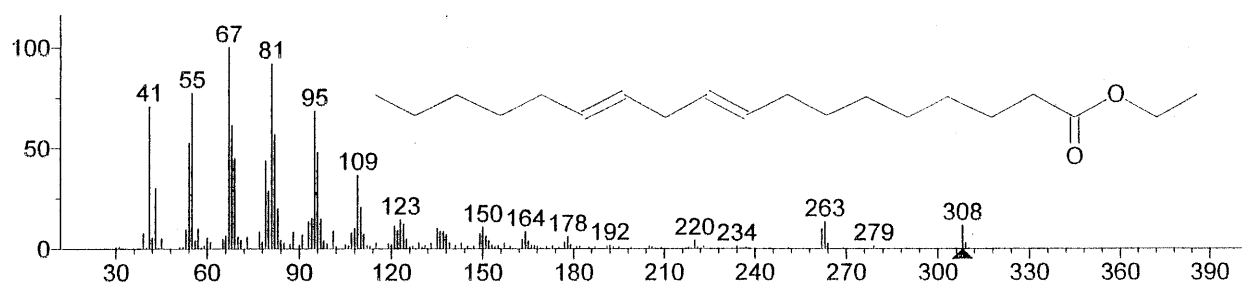

(mainlib) 9,12-Octadecadienoic acid, ethyl ester

Name: 9,12-Octadecadienoic acid, ethyl ester

Formula: C<sub>20</sub>H<sub>36</sub>O<sub>2</sub>

MW: 308 CAS#: 7619-08-1 NIST#: 249157 ID#: 28827 DB: mainlib

Other DBs: HODOC

Contributor: TNO Volatile Compounds in Food - Chemical Concepts

10 largest peaks:

67 999 | 81 919 | 55 772 | 41 707 | 95 683 | 68 613 | 82 569 | 54 525 | 96 478 | 69 448 |

Synonyms:

1.Ethyl (9E,12E)-9,12-octadecadienoate #

Estimated non-polar retention index (n-alkane scale):

Value: 2193 iu

Confidence interval (Esters): 47(50%) 201(95%) iu

Retention index.

1. Value: 2171 iu

Column Type: Capillary

Column Class: Semi-standard non-polar

Active Phase: HP

-5MS

Column Length: 30 m

Carrier Gas: He

Column Diameter: 0.25 mm

Phase Thickness: 0.25 µm

Data Type:

Normal alkane RI

Program Type: Complex

Description: 40C (10min) => 3C/min =>120C =>10C/min =>250C (5min)

Source: Ansorena, D.; Gimeno, O.; Astiasarán, I.; Bello, J., Analysis of volatile compounds by GC-MS of a dry fermented sausage: chorizo de Pamplona, Food Res. Int., 34, 2001, 67-75.

2. Value: 2527 iu

Column Type:

Capillary

Column Class: Standard polar

Active Phase: CP-Wax 52CB

Column Length: 60 m

Carrier Gas:

He

Column Diameter: 0.25 mm

Phase Thickness: 0.25 µm

Data Type: Linear RI

Program Type:

Complex

Description: 45C(5min) =>10C/min =>80C =>2C/min =>240C

Source: Romeo, V.; Ziino, M.; Giuffrida,

D.; Condurso, C.; Verzera, A., Flavour profile of capers (*Capparis spinosa* L.) from the Eolian Archipelago by HS-SPME/GC-MS, Food Chem., 101, 2007, 1272-1278.

<...>

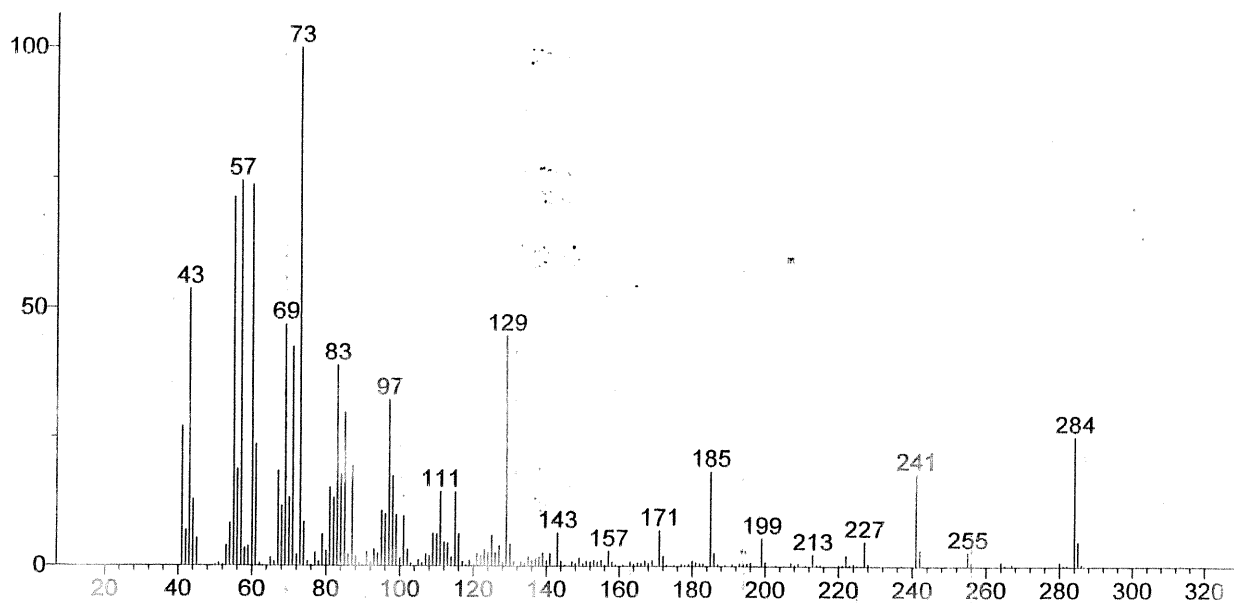

(Text File) +EI Scan (62.292 min) ALI-PI-S-H1-210421.D

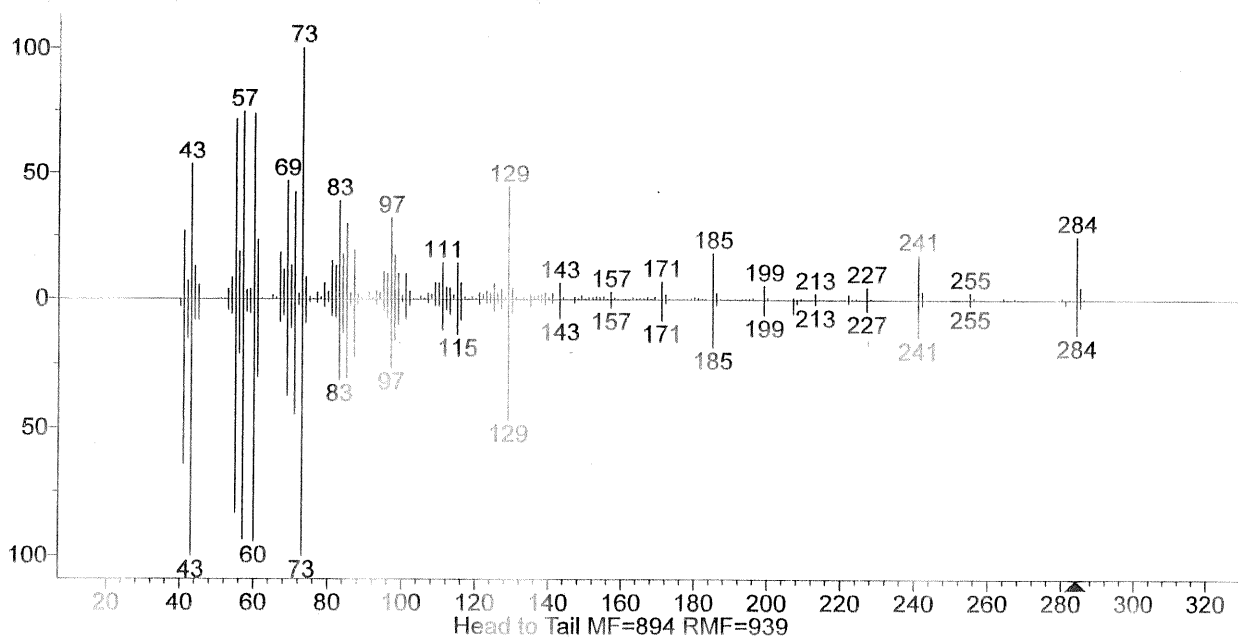

Head to Tail MF=894 RMF=939

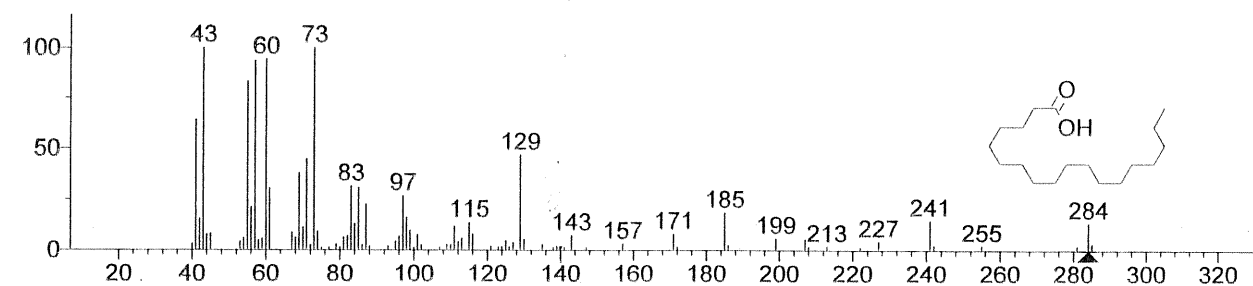

(replib) Octadecanoic acid

Name: Octadecanoic acid

Formula:  $C_{18}H_{36}O_2$

MW: 284 CAS#: 57-11-4 NIST#: 334866 ID#: 2560 DB: replib

Other DBs: Fine, TSCA, RTECS, EPA, HODOC, NIH, EINECS, IRDB

Contributor: Drug Lab

10 largest peaks:

43 999 | 73 999 | 60 942 | 57 934 | 55 832 | 41 642 | 129 468 | 71 447 | 69 376 | 83 311 |

Synonyms:

1. Stearic acid
2. n-Octadecanoic acid
3. Humko Industrine R
4. Hydrofol Acid 150
5. Hystrene S-97
6. Hystrene T-70
7. Hystrene 80
8. Industrine R
9. Kam 1000
10. Kam 2000
11. Kam 3000
12. Neo-Fat 18
13. Neo-Fat 18-53
14. Neo-Fat 18-54
15. Neo-Fat 18-55
16. Neo-Fat 18-59
17. NAA 173
18. PD 185
19. Stearex Beads
20. Stearophanic acid
21. Steric acid
22. Vanicol
23. 1-Heptadecanecarboxylic acid
24. Heptadecanecarboxylic acid
25. Neo-fat 18-61
26. Pearl stearic
27. Century 1240
28. Dar-chem 14
29. Emersol 120
30. Emersol 132
31. Emersol 150
32. Formula 300
33. Glycon dp
34. Glycon tp
35. Glycon S-70
36. Glycon S-80
37. Glycon S-90
38. Groco 54
39. Groco 55
40. Groco 55I
41. Groco 58
42. Groco 59
43. Hy-phi 1199
44. Hy-phi 1205
45. Hy-phi 1303
46. Hy-phi 1401

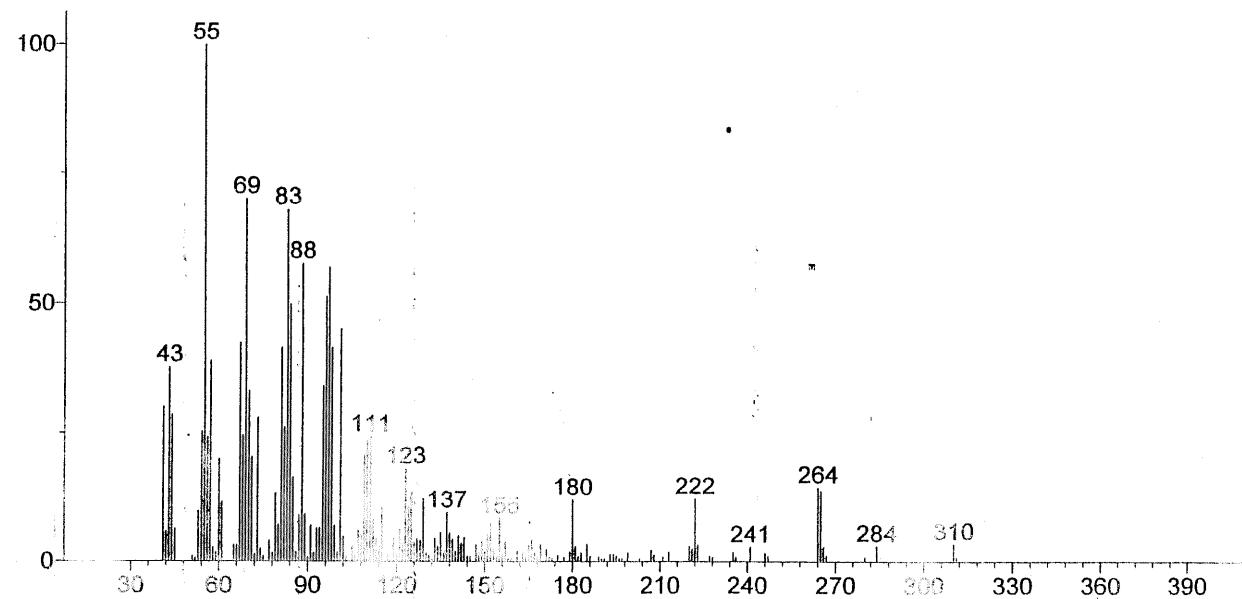

(Text File) +EI Scan (62.609 min) ALI-PIS-H1-210421.D

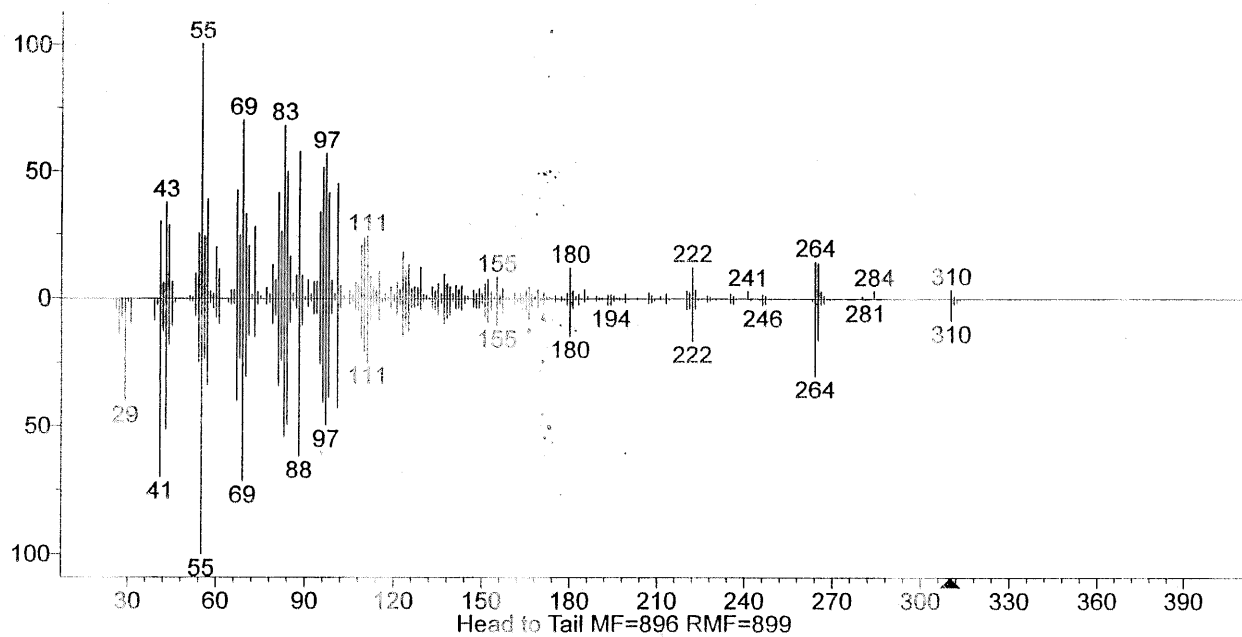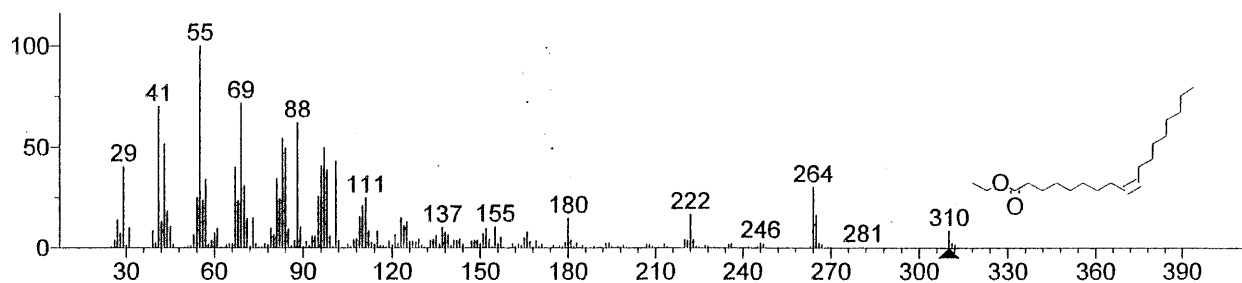

(replib) Ethyl Oleate

Name: Ethyl Oleate

Formula: C<sub>20</sub>H<sub>38</sub>O<sub>2</sub>

MW: 310 CAS#: 111-62-6 NIST#: 150151 ID#: 4466 DB: replib

Other DBs: Fine, TSCA, RTECS, USP, HODOC, NIH, EINECS, IRDB

Contributor: Chemical Concepts

10 largest peaks:

55 999 | 69 714 | 41 699 | 88 618 | 83 543 | 43 515 | 97 496 | 84 495 | 101 429 | 96 407 |

Synonyms:

1. 9-Octadecenoic acid (Z)-, ethyl ester

2. Oleic acid, ethyl ester

3. (Z)-9-Octadecenoic acid ethyl ester

4. Ethyl cis-9-octadecenoate

5. Ethyl Z-9-octadecenoate

6. Ethyl (9Z)-9-octadecenoate #

Estimated non-polar retention index (n-alkane scale):

Value: 2185 iu

Confidence interval (Esters): 47(50%) 201(95%) iu

Retention index.

1. Value: 2171 iu

Column Type: Capillary

Column Class: Standard non-polar

Active Phase: CP Sil 5 CB

Column

Length: 60 m

Carrier Gas: He

Column Diameter: 0.32 mm

Phase Thickness: 0.25 µm

Data Type: Linear

RI

Program Type: Ramp

Start T: 60 C

End T: 280 C

Heat Rate: 3 K/min

Start Time: 10 min

End Time: 60

min

Source: Pino, J.; Almora, K.; Marbot, R., Volatile components of papaya (*Carica papaya* L., maradol variety) fruit, *Flavour Fragr. J.*, 18, 2003, 492-496.

2. Value: 2160 iu

Column Type: Capillary

Column Class: Standard  
non-polar

Active Phase: OV-1

Column Length: 25 m

Carrier Gas: He

Column Diameter: 0.32 mm

Data Type:

Linear RI

Program Type: Ramp

Start T: 40 C

End T: 280 C



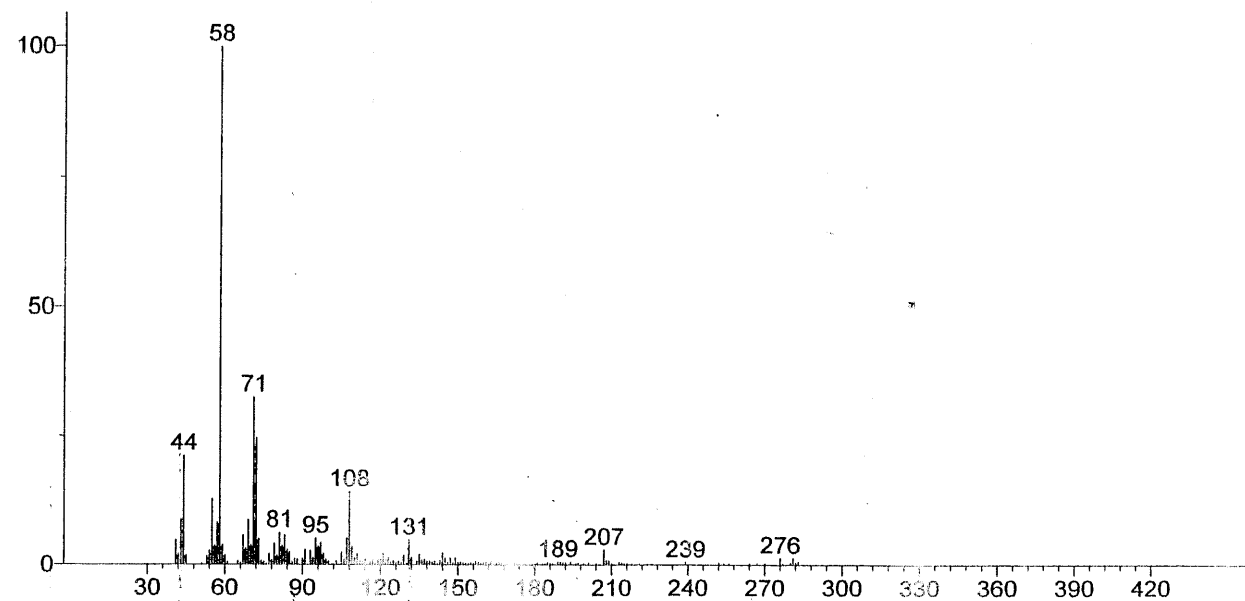

(Text File) +EI Scan (70.392 min) ALI-PIS-H1-210421.D

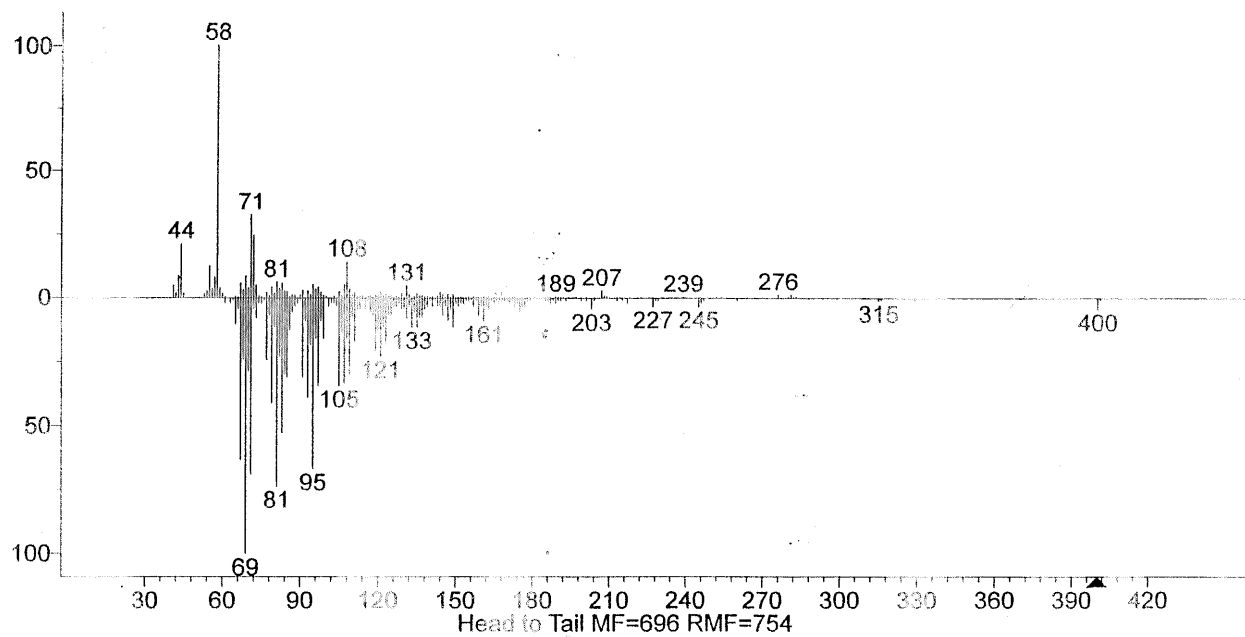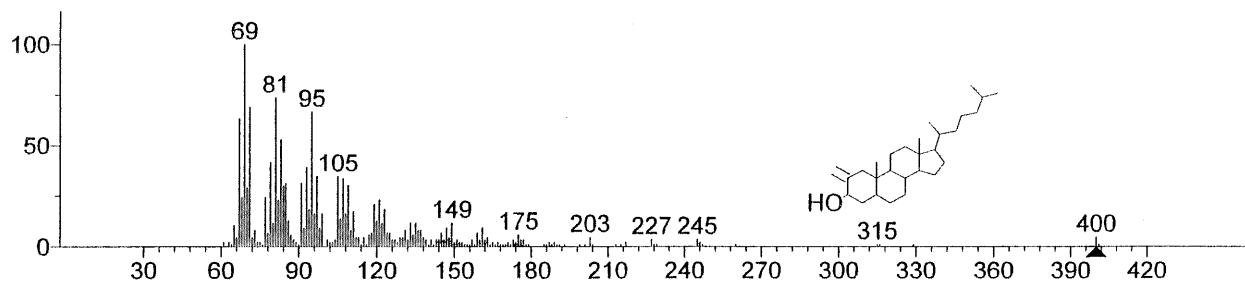

(mainlib) Cholestan-3-ol, 2-methylene-, (3 $\beta$ ,5 $\alpha$ )-

46  
Name: Cholestan-3-ol, 2-methylene-, (3 $\beta$ ,5 $\alpha$ )-

Formula: C<sub>28</sub>H<sub>48</sub>O

MW: 400 CAS#: 22599-96-8 NIST#: 48741 ID#: 30965 DB: mainlib

Other DBs: None

Contributor: CARL DJERASSI DEPT OF CHEM STANFORD UNIV STANFORD CALIF 94305

10 largest peaks:

69 999 | 81 735 | 71 689 | 95 666 | 67 632 | 83 528 | 79 413 | 93 390 | 97 344 | 105 344 |

Synonyms:

1.5 $\alpha$ -Cholestan-3 $\beta$ -ol, 2-methylene-

2.2-Methylenecholestan-3-ol #

Estimated non-polar retention index (n-alkane scale):

Value: 2652 iu

Confidence interval (Low reliability): 174(50%) 752(95%) iu

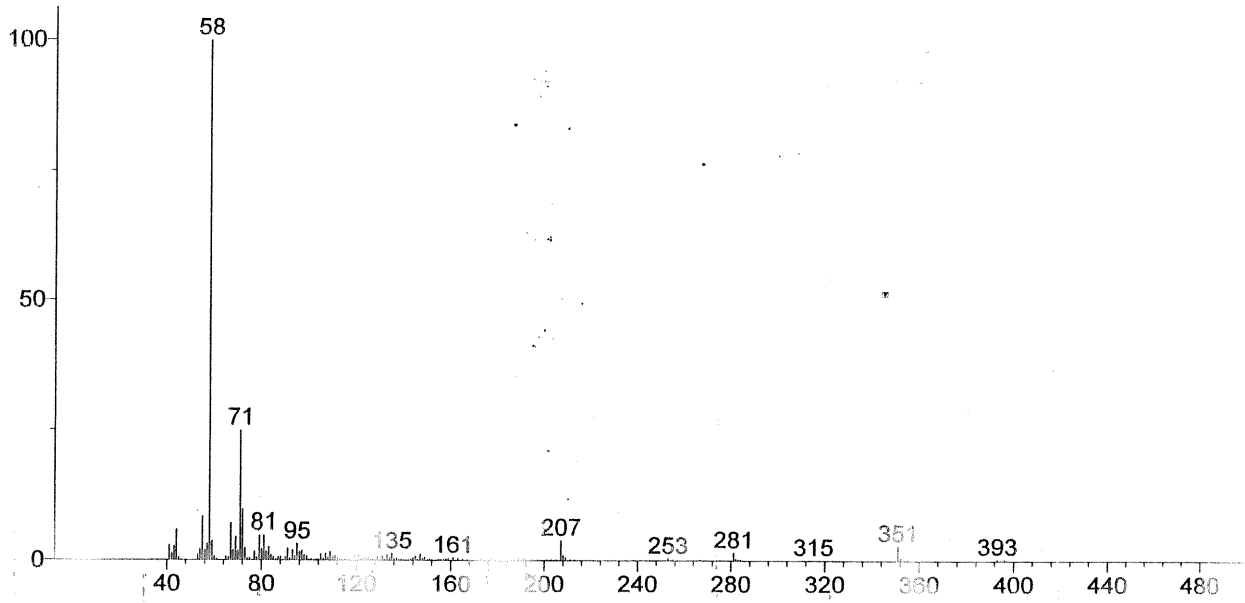

(Text File) +EI Scan (74.929 min) ALI-PIS-H1-210421.D

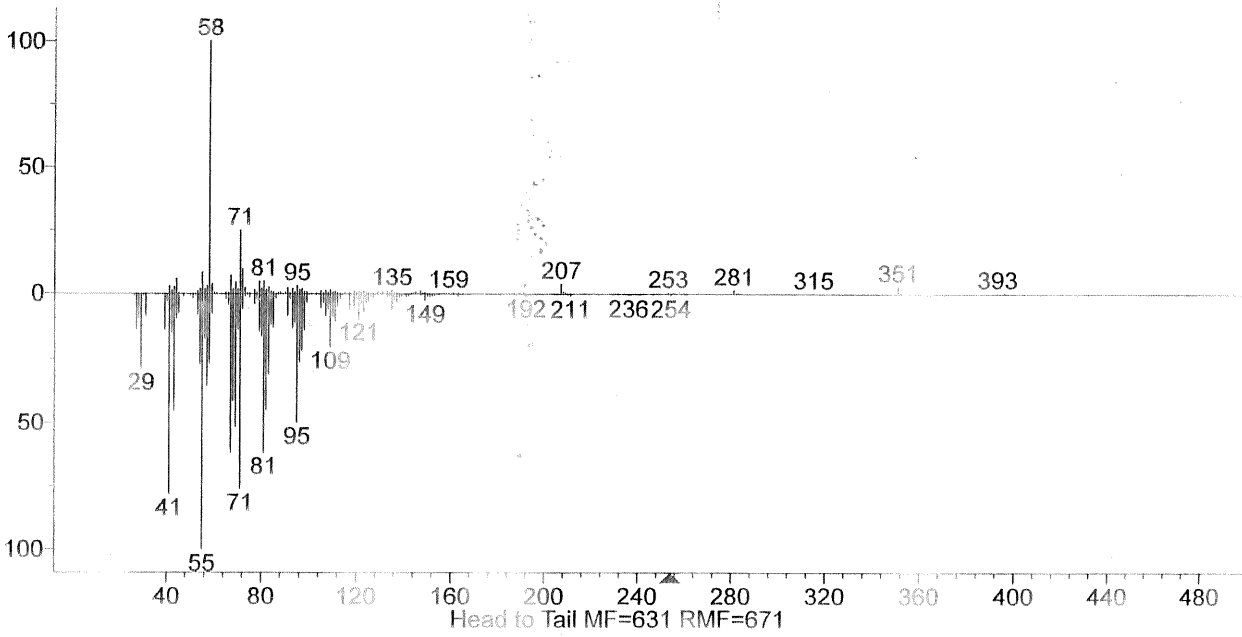

Head to Tail MF=631 RMF=671

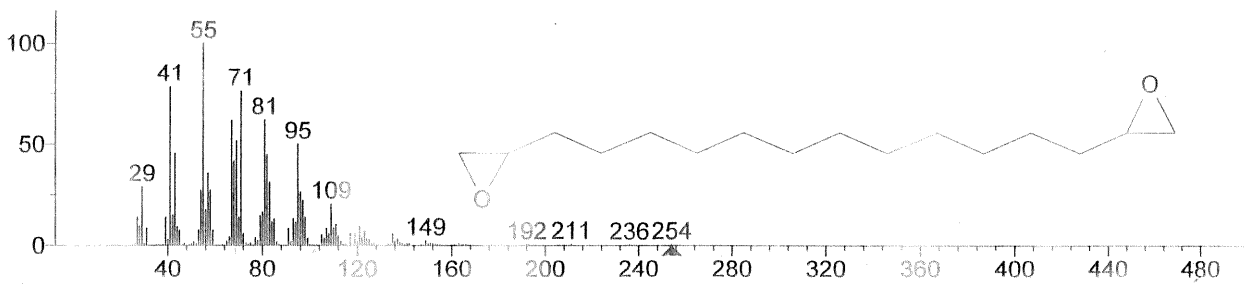

(mainlib) 1,2-15,16-Diepoxyhexadecane

Name: 1,2-15,16-Diepoxyhexadecane

Formula:  $C_{16}H_{30}O_2$

MW: 254 NIST#: 192650 ID#: 17537 DB: mainlib

Contributor: Chemical Concepts

10 largest peaks:

55 999 | 41 782 | 71 762 | 81 618 | 67 616 | 69 516 | 95 499 | 43 453 | 82 449 | 68 417 |

Synonyms:

no synonyms.

Estimated non-polar retention index (n-alkane scale):

Value: 1792 iu

Confidence interval (Ethers): 68(50%) 293(95%) iu

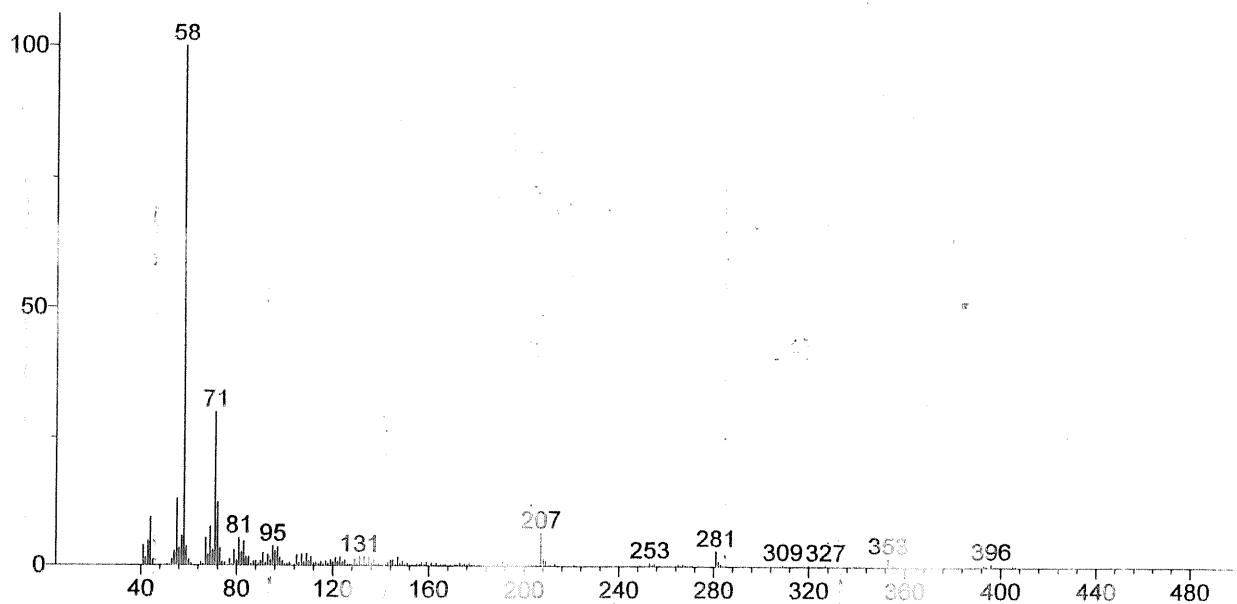

(Text File) +EI Scan (75.025 min) ALI-PIS-H1-210421.D

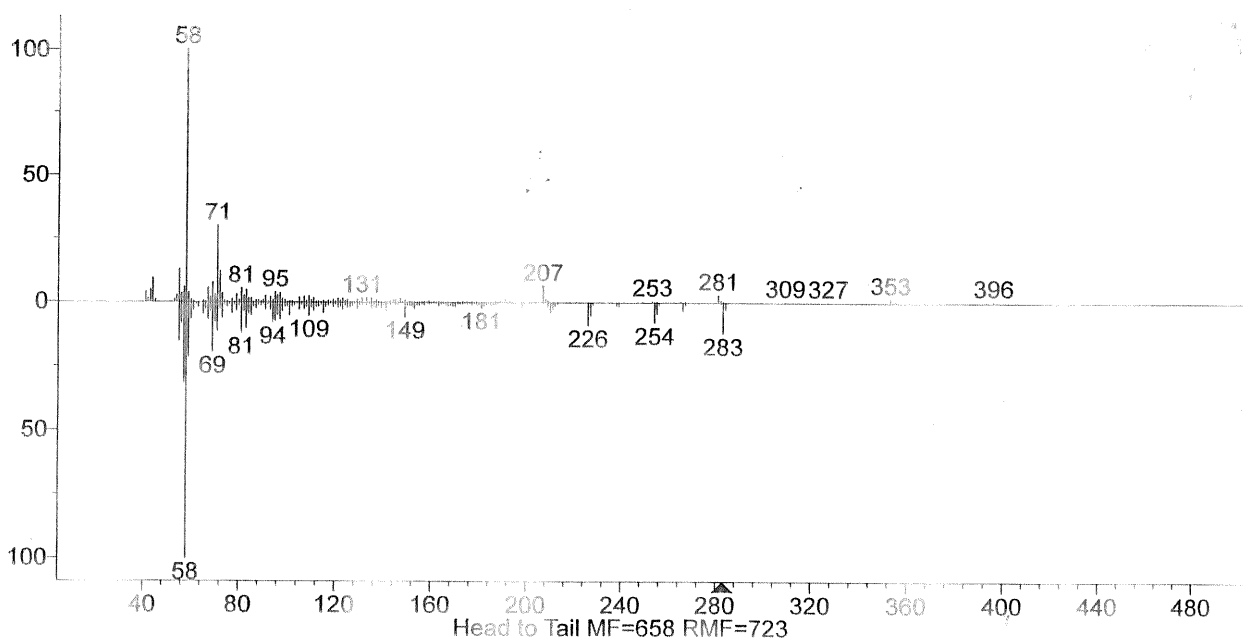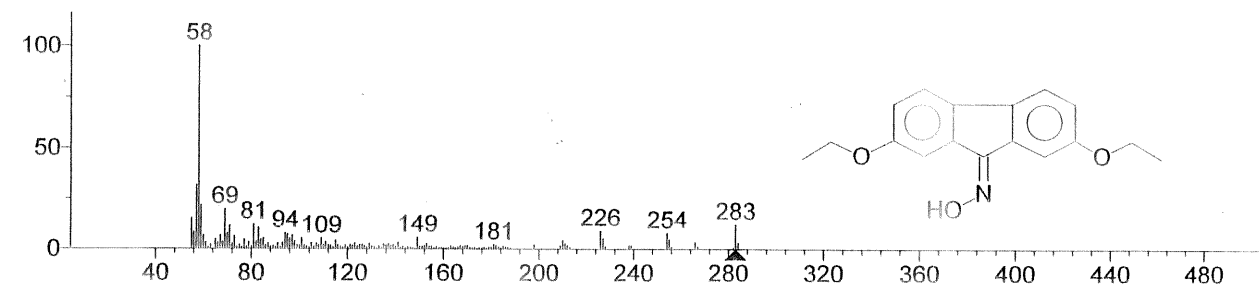

(mainlib) 9-Oximino-2,7-diethoxyfluorene

50  
Name: 9-Oximino-2,7-diethoxyfluorene

Formula: C<sub>17</sub>H<sub>17</sub>NO<sub>3</sub>

MW: 283 CAS#: 327041-58-7 NIST#: 111061 ID#: 24922 DB: mainlib

Other DBs: None

Contributor: Institute of Organic Chemistry, USSR, 1990

10 largest peaks:

58 999 | 57 316 | 59 216 | 69 195 | 55 153 | 81 121 | 283 121 | 71 116 | 83 105 | 226 90 |

Synonyms:

1,2,7-Diethoxy-9H-fluoren-9-one oxime #

Estimated non-polar retention index (n-alkane scale):

Value: 2403 iu

Confidence interval (Diverse functional groups): 89(50%) 382(95%) iu

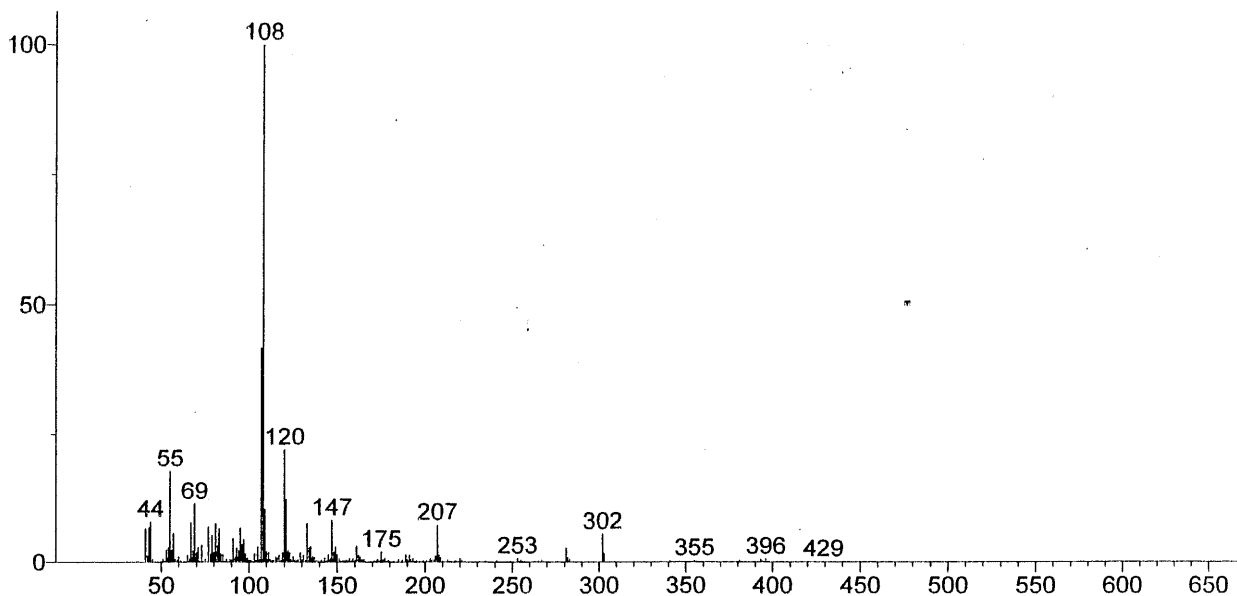

(Text File) +EI Scan (75.328 min) ALI-PIS-H1-210421.D

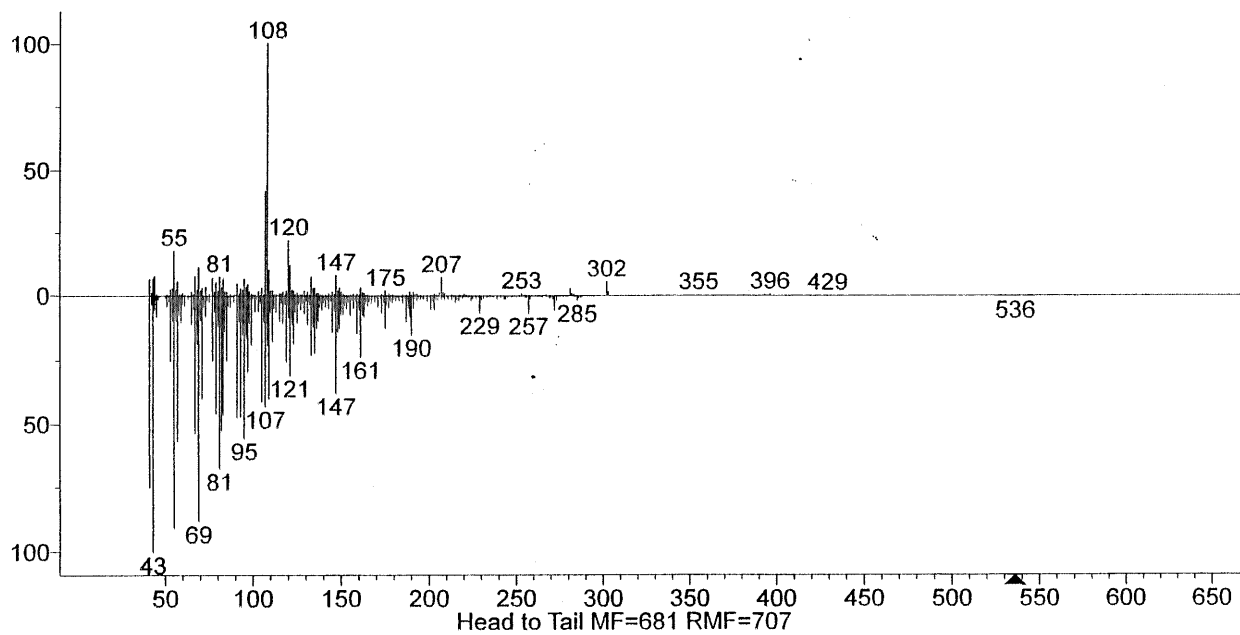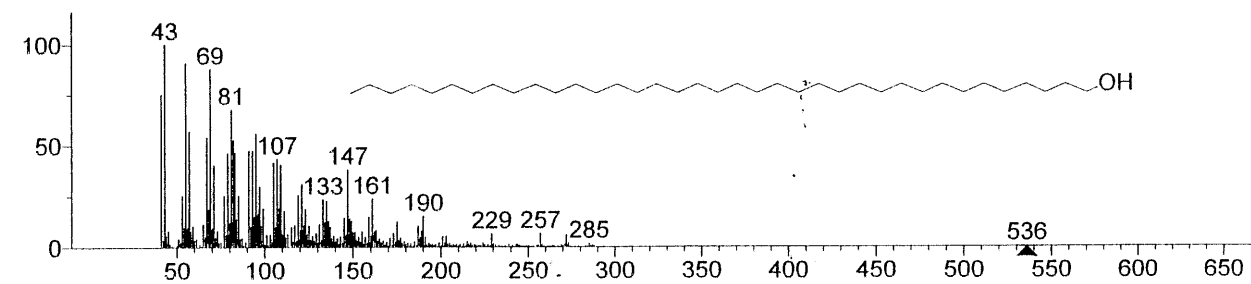

(mainlib) 1-Heptatriacotanol

Name: 1-Heptatriacotanol

Formula:  $C_{37}H_{76}O$

MW: 536 CAS#: 105794-58-9 NIST#: 127968 ID#: 6806 DB: mainlib

Other DBs: None

Contributor: LAC, NIDDK, NIH, Bethesda, MD 20892

10 largest peaks:

43 999 | 55 907 | 69 878 | 41 750 | 81 675 | 57 567 | 95 556 | 67 537 | 82 525 | 91 474 |

Synonyms:

1.1-Heptatriacontanol #

Estimated non-polar retention index (n-alkane scale):

Value: 3942 iu

Confidence interval (Alcohols): 41(50%) 176(95%) iu



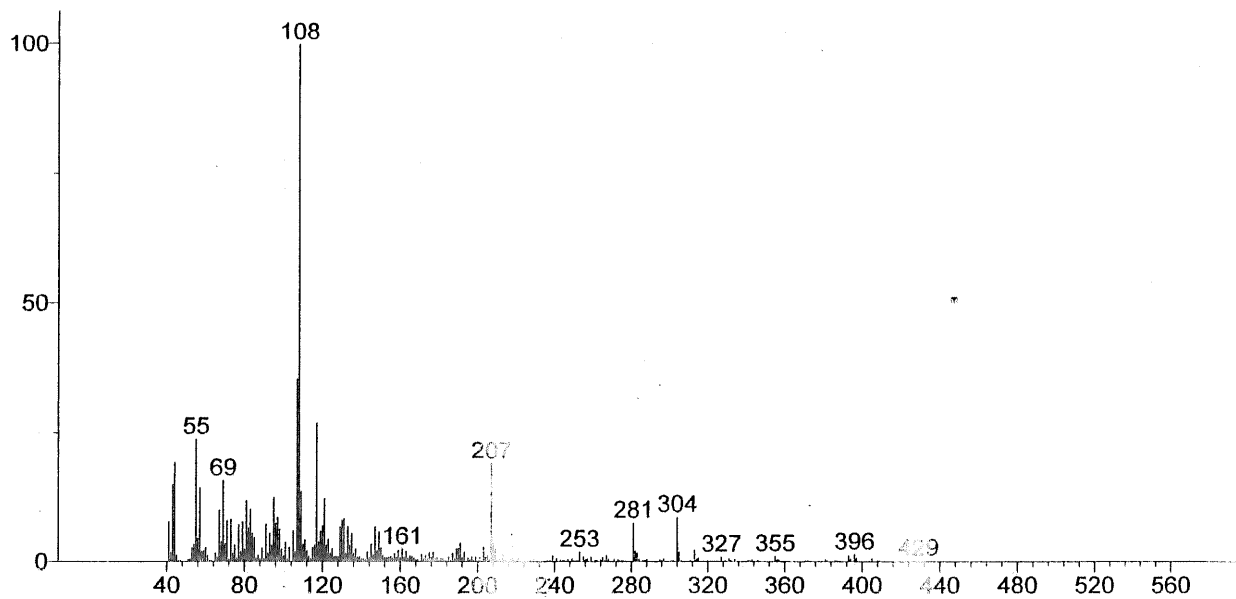

(Text File) +EI Scan (75.702 min) ALI-PIS-H1-210421.D

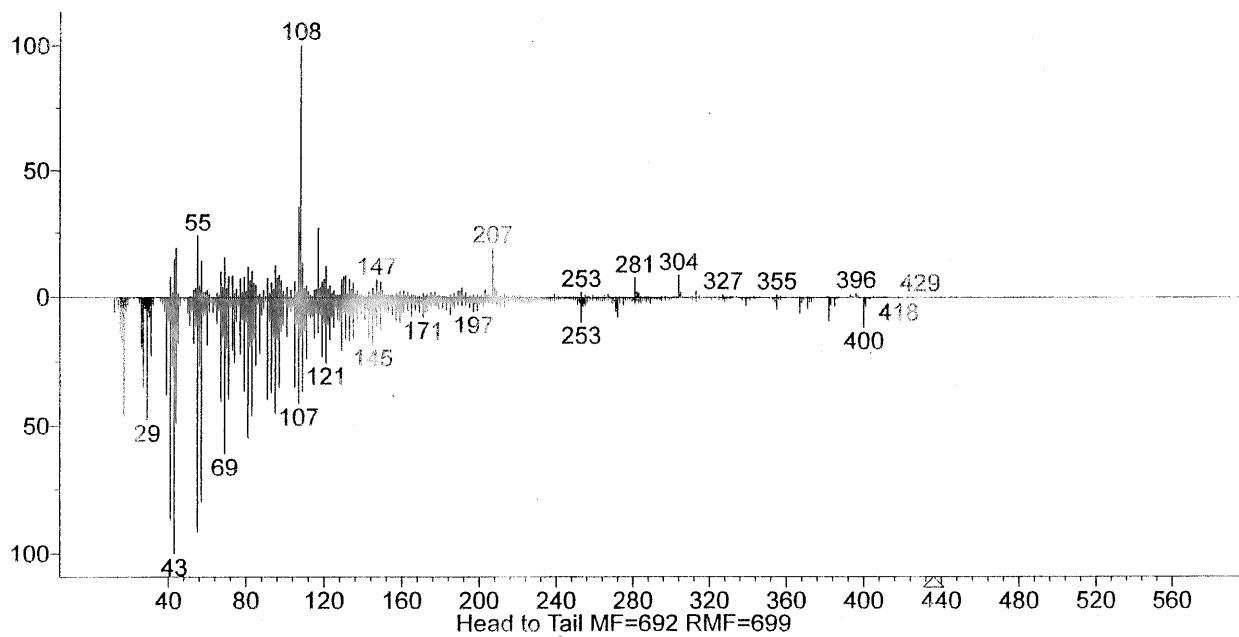

Head to Tail MF=692 RMF=699

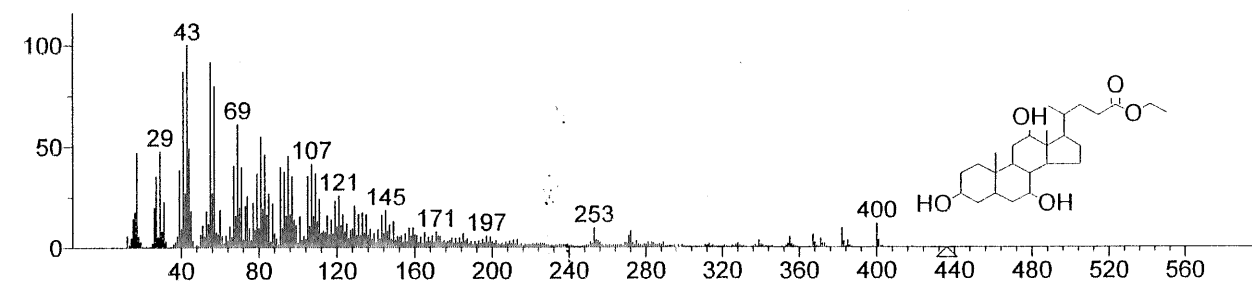

(mainlib) Ethyl iso-allocholate

59

Name: Ethyl iso-allocholate

Formula: C<sub>26</sub>H<sub>44</sub>O<sub>5</sub>

MW: 436 NIST#: 43053 ID#: 6556 DB: mainlib

Contributor: R RYHAGE MS-LAB KAROLINSKA INSTITUTET STOCKHOLM SWEDEN

10 largest peaks:

43 999 | 55 914 | 41 867 | 57 797 | 69 609 | 81 547 | 44 492 | 29 476 | 17 469 | 83 460 |

Synonyms:

no synonyms.

Estimated non-polar retention index (n-alkane scale):

Value: 3094 iu

Confidence interval (Low reliability): 174(50%) 752(95%) iu

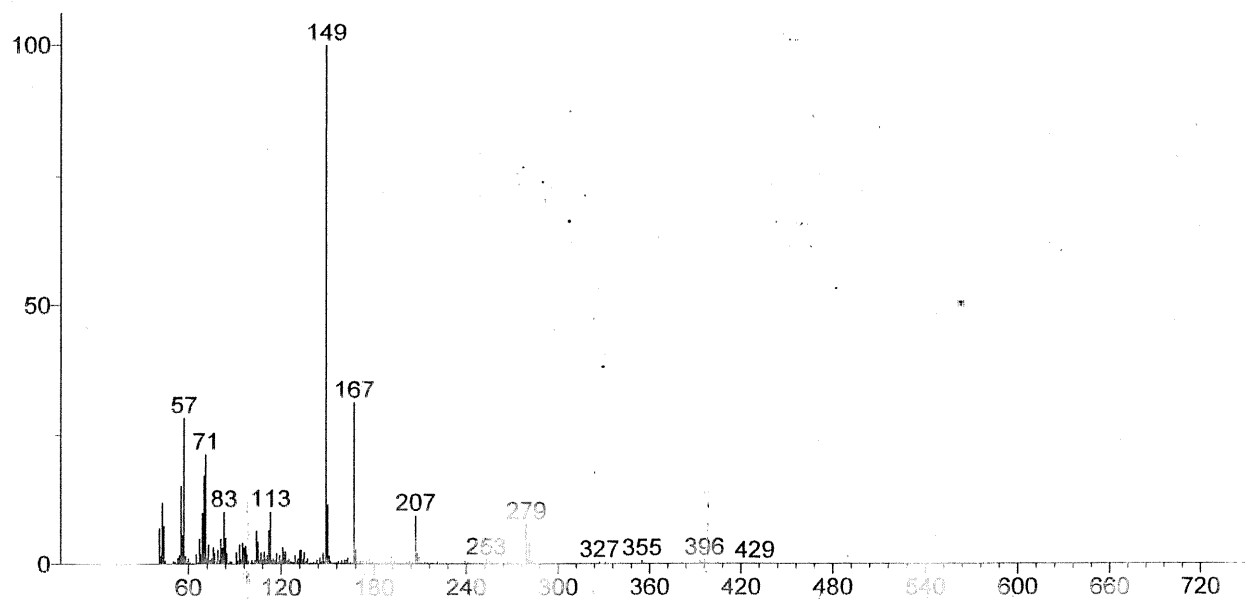

(Text File) +EI Scan (76.675 min) ALI-PIS-H1-210421.D

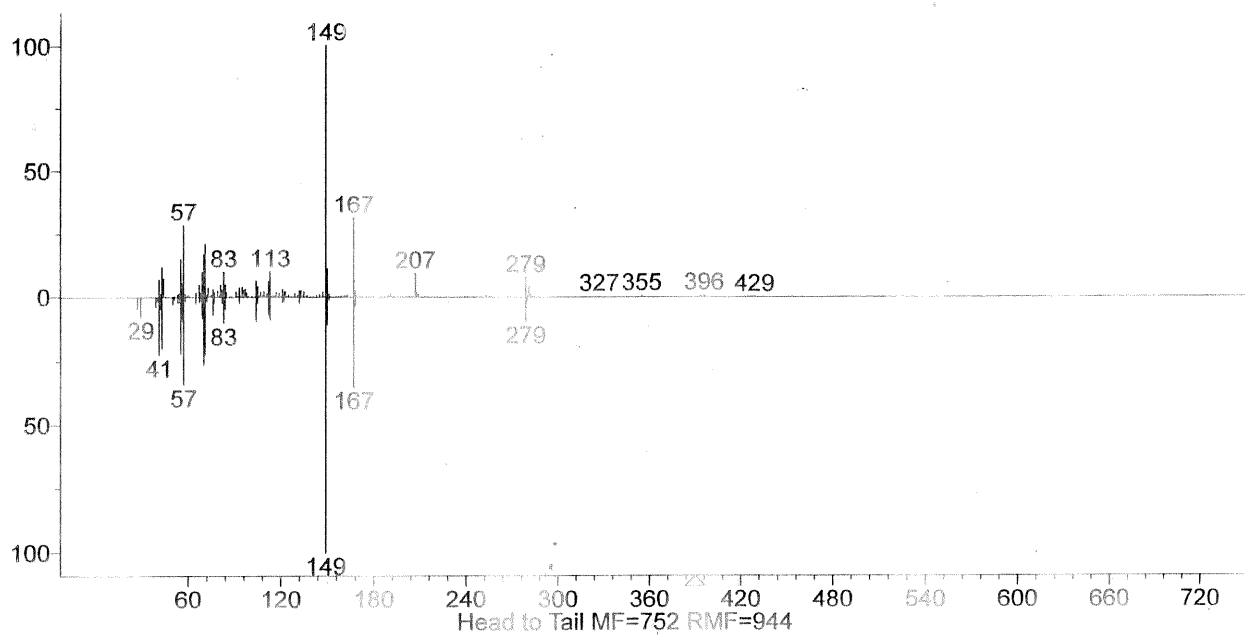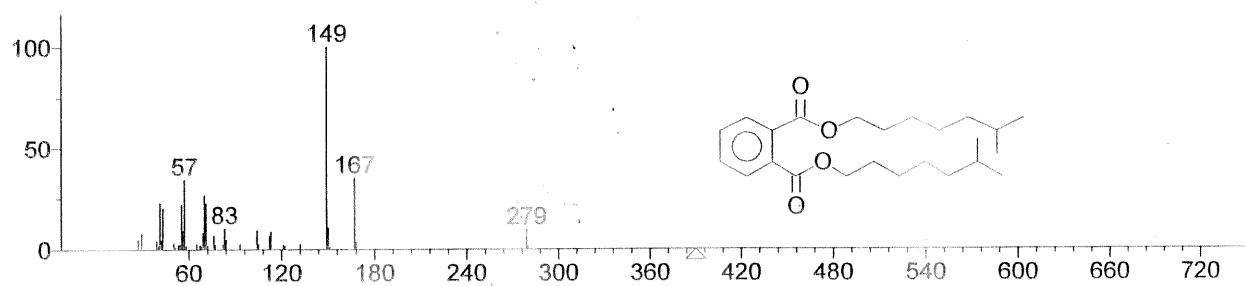

(replib) 1,2-Benzenedicarboxylic acid, diisooctyl ester

Name: 1,2-Benzenedicarboxylic acid, diisooctyl ester

Formula: C<sub>24</sub>H<sub>38</sub>O<sub>4</sub>

MW: 390 CAS#: 27554-26-3 NIST#: 113206 ID#: 20061 DB: replib

Other DBs: Fine, TSCA, RTECS, EINECS, IRDB

Contributor: NIST Mass Spectrometry Data Center, 1990.

10 largest peaks:

149 999 | 167 350 | 57 341 | 70 264 | 41 225 | 71 224 | 55 218 | 43 200 | 150 107 | 83 100 |

Synonyms:

1. Diisooctyl phthalate
2. Hexaplas M/O
3. Isooctyl phthalate
4. Corflex 880
5. DIOP
6. Flexol plasticizer diop
7. Morflex 100
8. Palatinol D10
9. Phthalic acid, bis(6-methylheptyl) ester
10. Phthalic acid, diisooctyl ester
11. Witcizer 313
12. Bis(6-methylheptyl) phthalate #

Estimated non-polar retention index (n-alkane scale):

Value: 2704 iu

Confidence interval (Esters): 47(50%) 201(95%) iu

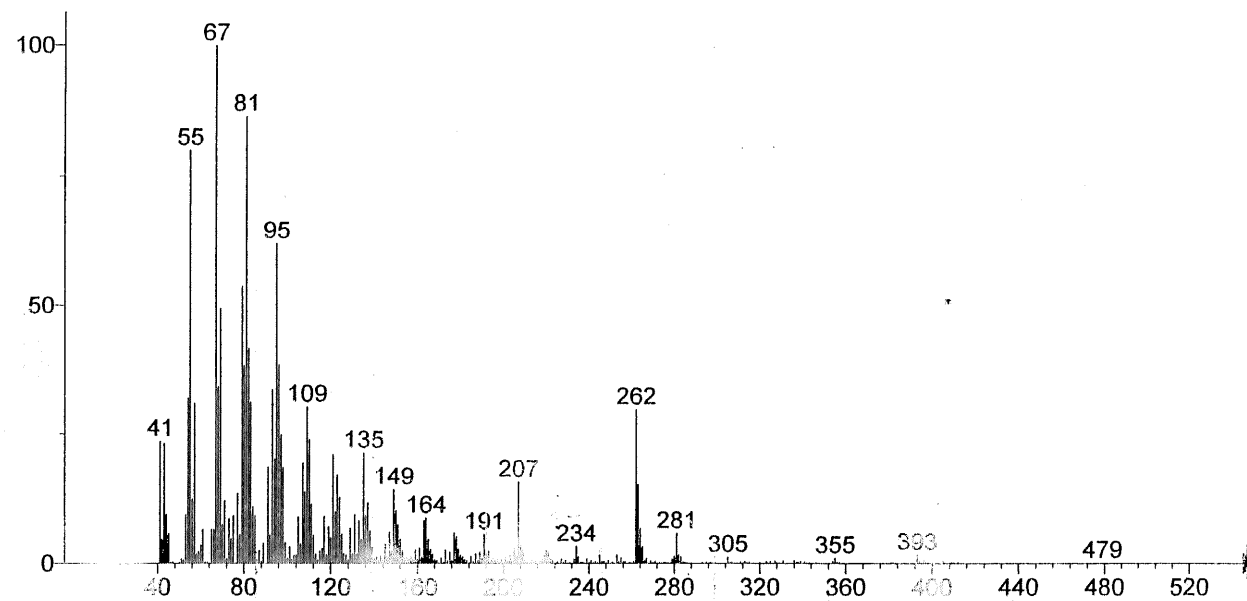

(Text File) +EI Scan (78.810 min) ALI-PIS-H1-210421.D

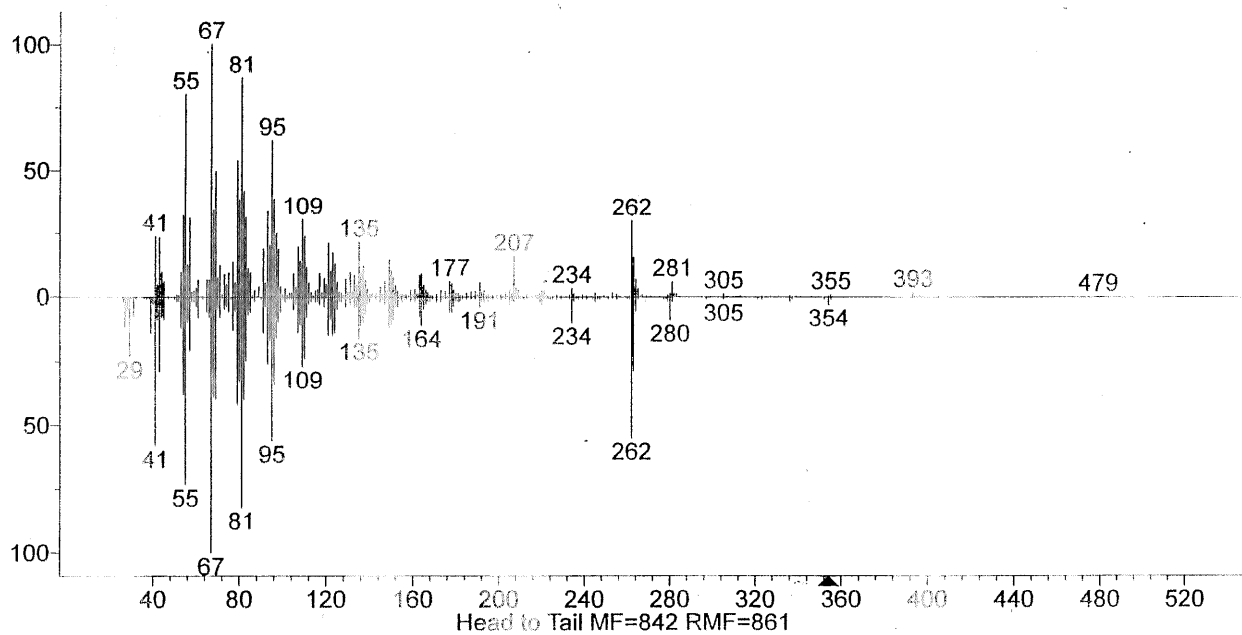

Head to Tail MF=842 RMF=861

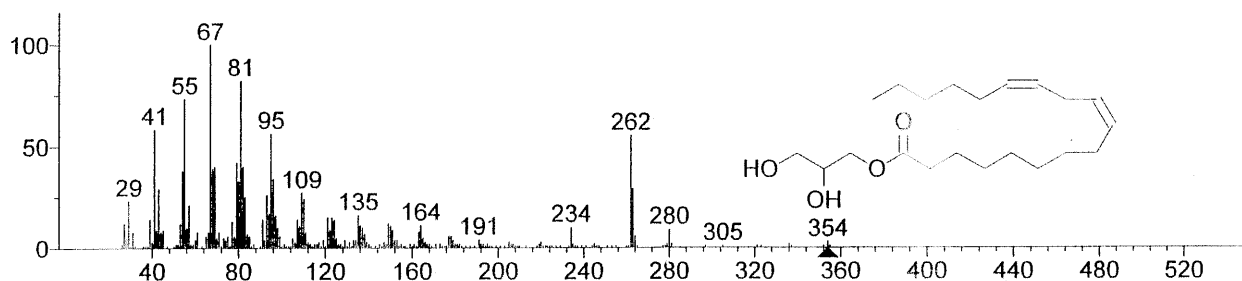

(mainlib) 9,12-Octadecadienoic acid (Z,Z)-, 2,3-dihydroxypropyl ester

Name: 9,12-Octadecadienoic acid (Z,Z)-, 2,3-dihydroxypropyl ester

Formula:  $C_{21}H_{38}O_4$

MW: 354 CAS#: 2277-28-3 NIST#: 16012 ID#: 28839 DB: mainlib

Other DBs: EINECS

10 largest peaks:

67 999 | 81 820 | 55 730 | 41 580 | 95 560 | 262 550 | 79 420 | 69 400 | 82 400 | 68 390 |

Synonyms:

1. Linolein, 1-mono-

2.  $\alpha$ -Glyceryl linoleate

3. Glycerol 1-monolinolate

4. Oleinate 288

5. 1-Glyceryl linoleate

6. 1-Monolinolein

7. 2,3-Dihydroxypropyl (9Z,12Z)-9,12-octadecadienoate #

Estimated non-polar retention index (n-alkane scale):

Value: 2697 iu

Confidence interval (Diverse functional groups): 89(50%) 382(95%) iu

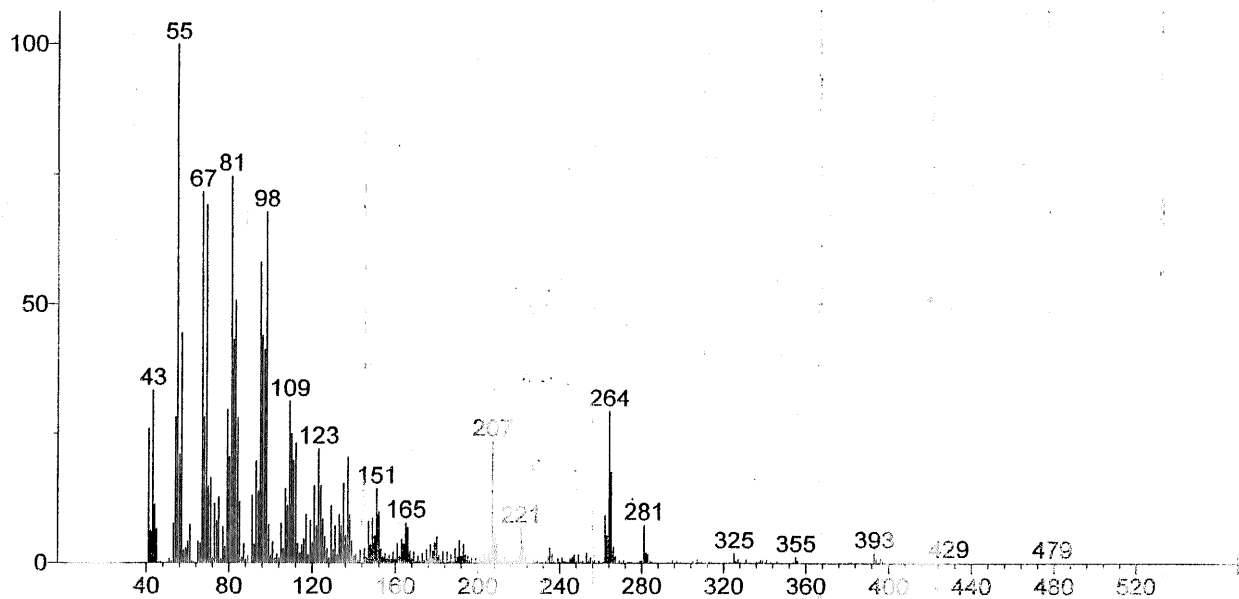

(Text File) +EI Scan (78.853 min) ALL-PIS-H1-210421.D

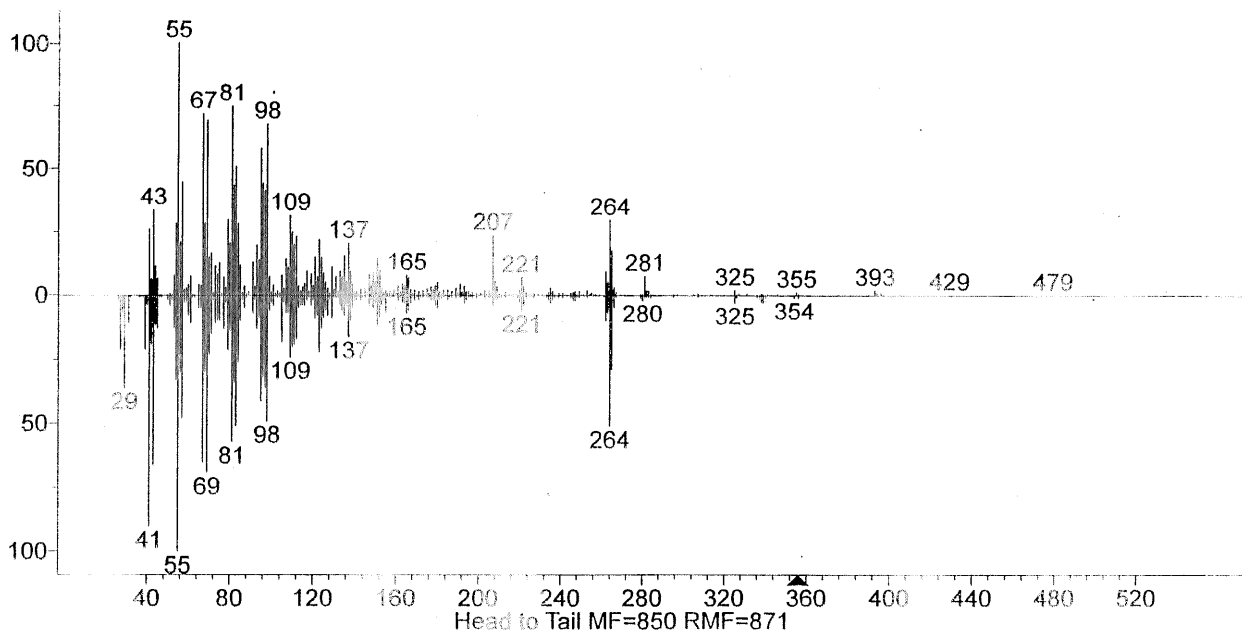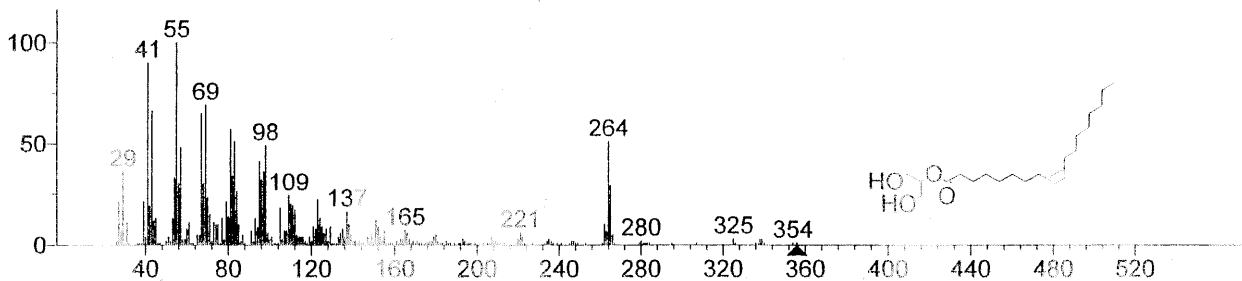

(mainlib) 9-Octadecenoic acid (Z)-, 2-hydroxy-1-(hydroxymethyl)ethyl ester

Name: 9-Octadecenoic acid (Z)-, 2-hydroxy-1-(hydroxymethyl)ethyl ester

Formula: C<sub>21</sub>H<sub>40</sub>O<sub>4</sub>

MW: 356 CAS#: 3443-84-3 NIST#: 16061 ID#: 17482 DB: mainlib

Other DBs: None

10 largest peaks:

55 999 | 41 900 | 69 690 | 43 660 | 67 650 | 81 570 | 83 510 | 264 510 | 98 490 | 57 480 |

Synonyms:

1.Olein, 2-mono-

2.β-Monoolein

3.Glycerol 2-monooleate

4.2-Monoolein

5.2-Monooleoylglycerol

6.2-Oleoyl glycerol ether

7.2-Oleoylglycerol

8.2-Hydroxy-1-(hydroxymethyl)ethyl (9Z)-9-octadecenoate #

Estimated non-polar retention index (n-alkane scale):

Value: 2705 iu

Confidence interval (Diverse functional groups): 89(50%) 382(95%) iu



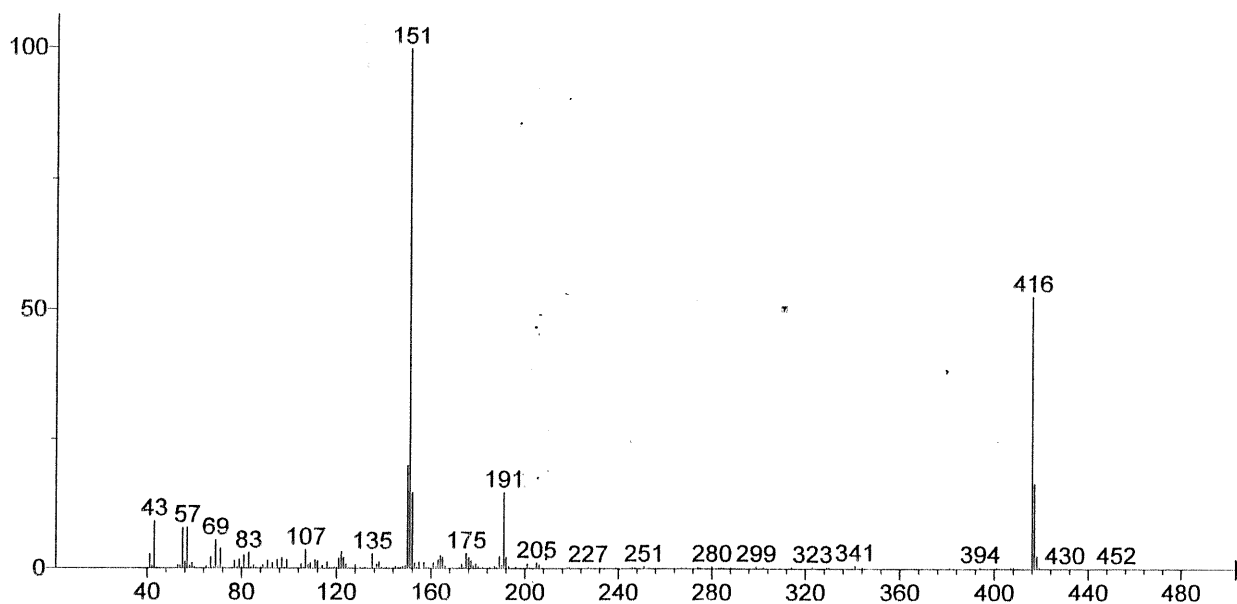

(Text File) +EI Scan (84.734 min) ALI-PIS-H1-210421.D Subtract

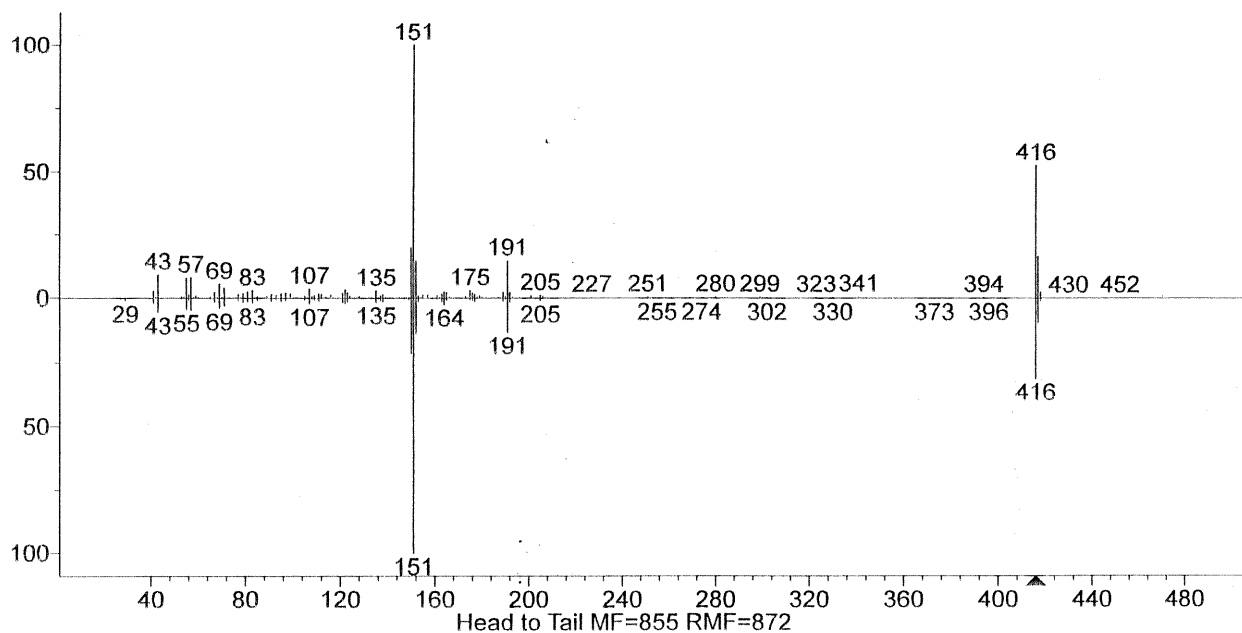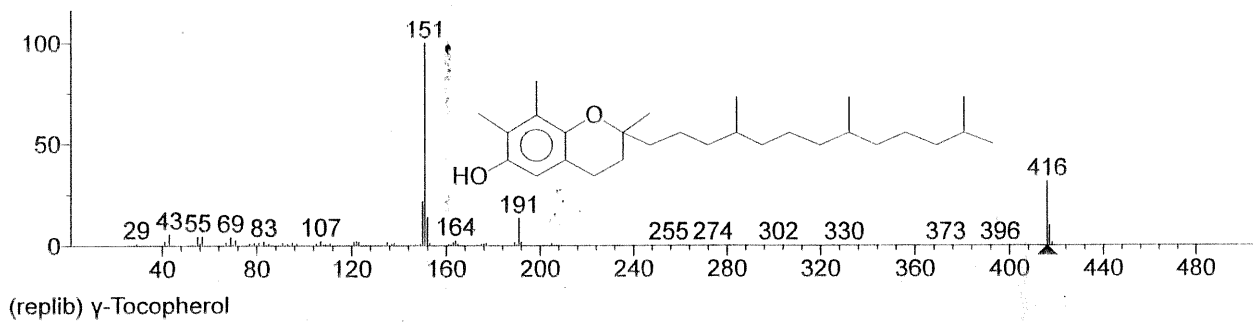

Name:  $\gamma$ -Tocopherol

Formula: C<sub>28</sub>H<sub>48</sub>O<sub>2</sub>

MW: 416 CAS#: 7616-22-0 NIST#: 151381 ID#: 20323 DB: replib

Other DBs: TSCA, HODOC, EINECS

Contributor: Chemical Concepts

10 largest peaks:

151 999 | 416 312 | 150 216 | 152 137 | 191 132 | 417 98 | 43 55 | 55 44 | 57 44 | 69 40 |

Synonyms:

1.2H-1-Benzopyran-6-ol, 3,4-dihydro-2,7,8-trimethyl-2-(4,8,12-trimethyltridecyl)-

2.6-Chroman-2-ol, 2,7,8-trimethyl-2-(4,8,12-trimethyltridecyl)-

3. $\gamma$ -Tokoferol

4. $\alpha$ -Xylotocopherol

5.7,8-Dimethyltolcol

6.3,4-Dihydro-2,7,8-trimethyl-2-(4,8,12-trimethyltridecyl)-2H-1-benzopyran-6-ol

7.7,8-Dimethyltolcolo-xylotocopherol

8.2,7,8-Trimethyl-2-(4,8,12-trimethyltridecyl)-6-chroman-2-ol #

Estimated non-polar retention index (n-alkane scale):

Value: 3036 iu

Confidence interval (Diverse functional groups): 89(50%) 382(95%) iu

Retention index.

1. Value: 3994 iu

Column Type: Capillary

Column Class: Standard non-polar

Active Phase: SE-30

Column

Length: 30 m

Carrier Gas: He

Column Diameter: 0.25 mm

Phase Thickness: 0.25  $\mu$ m

Data Type: Linear

RI

Program Type: Ramp

Start T: 60 C

End T: 280 C

Heat Rate: 16 K/min

Start Time: 3 min

End Time: 10

min

Source: Tundis, R.; Passalacqua, N.G.; Peruzzi, L.; Statti, G.A.; Bonesi, M.; Loizzo, M.R.; Conforti, F.; Cesca, G.; Menichini, F., Comparative chemical variability of the non-polar extracts from *Senecio cineraria* group (Asteraceae), *Biochem. Syst. Ecol.*, 33, 2005, 1071-1076.
