# Supplementary material for: Probing Antibacterial and Anticancer Potential of Selenicereus undatus, Pistacia vera L. and Olea europaea L. against Uropathogens, MCF-7 and A2780 Cancer Cells
Source: MDPI journal article supplement (doi:10.3390/molecules28248148), 2023-12-18
Supplement: s1 [file s1]

Sample Name ALI-OLE-H7-220421- Position 12 Instrument Name GCMS TQQQ User Name HEJ-G-104-03\Agile  
Inj Vol 3 InjPosition ACQ Method ALI-IMRAN-140421.M SampleType Comment IRM Calibration Status Not Applicable  
Data Filename ALI-OLE-H7-220421-D ACQ Method ALI-IMRAN-140421.M Comment 4/22/2021 3:25:56 | Acquired Time

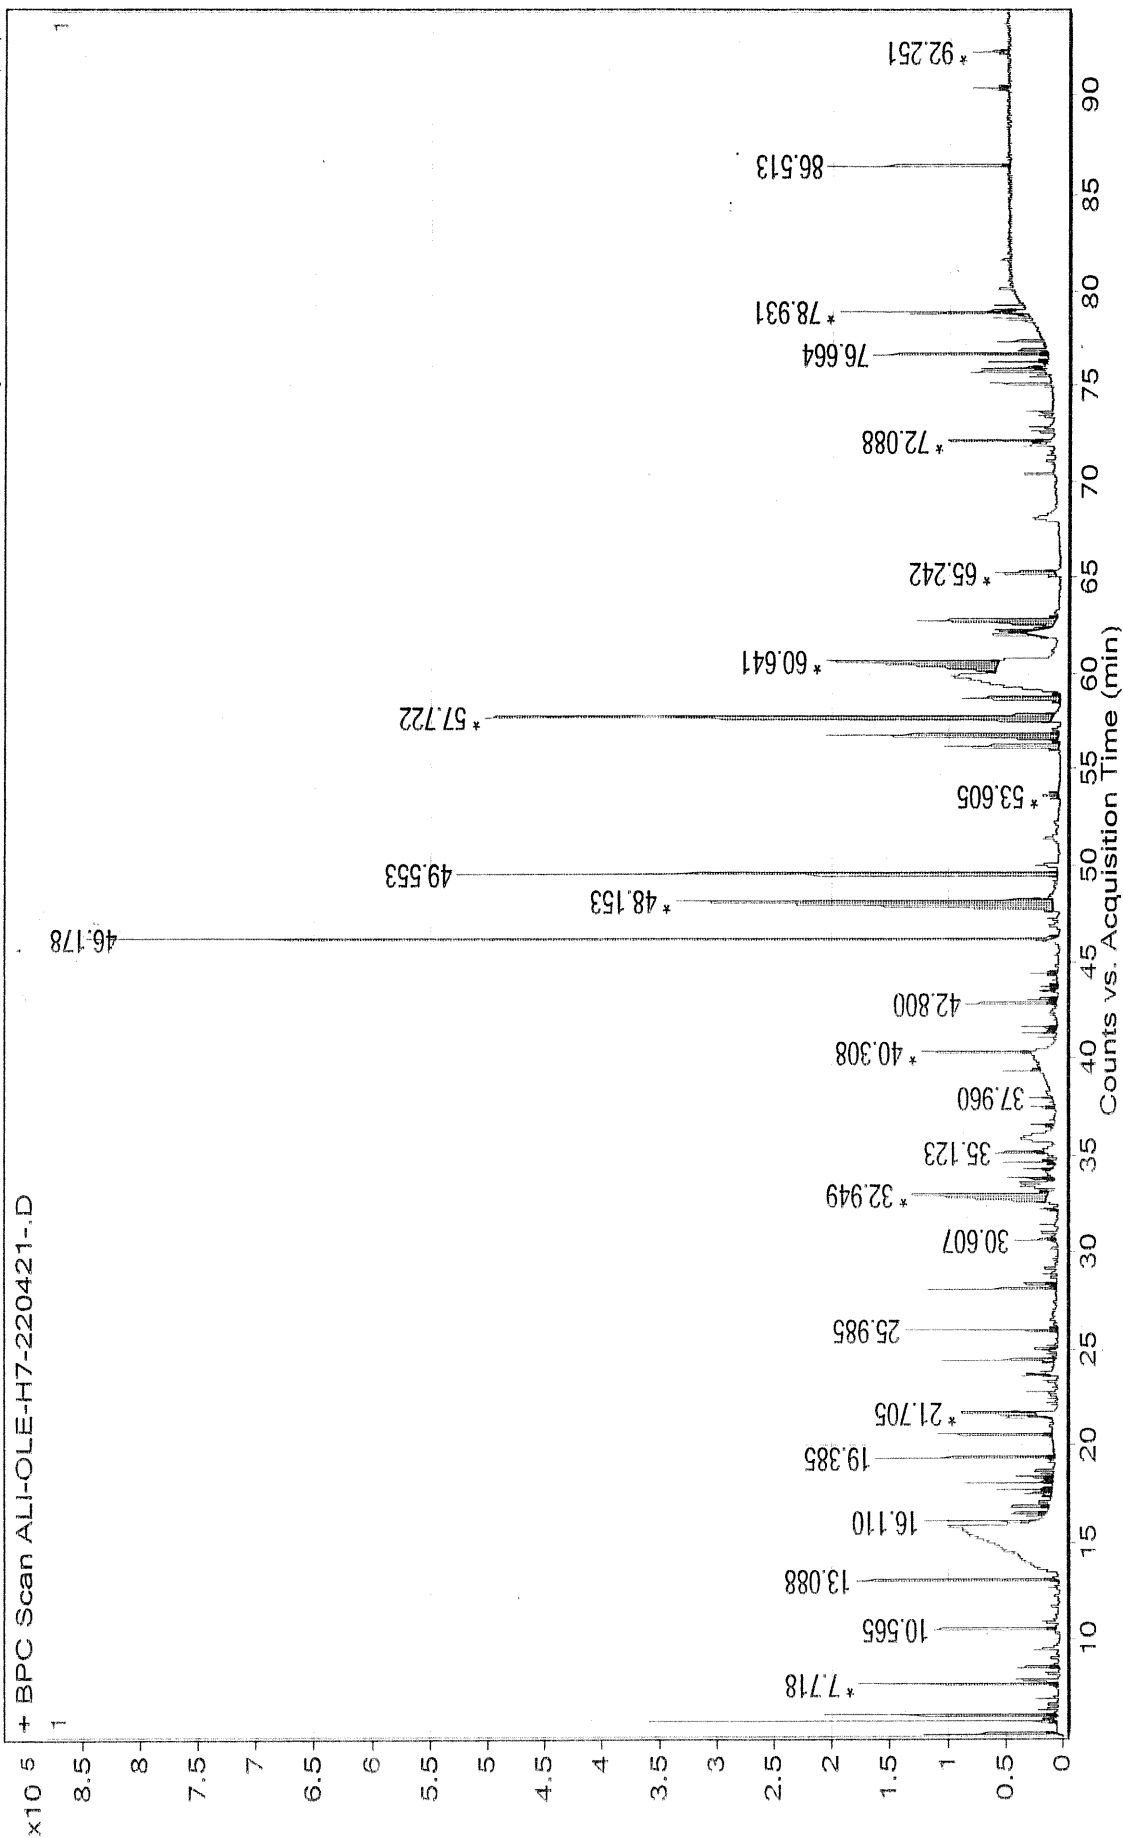

it

PM

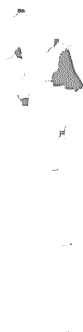

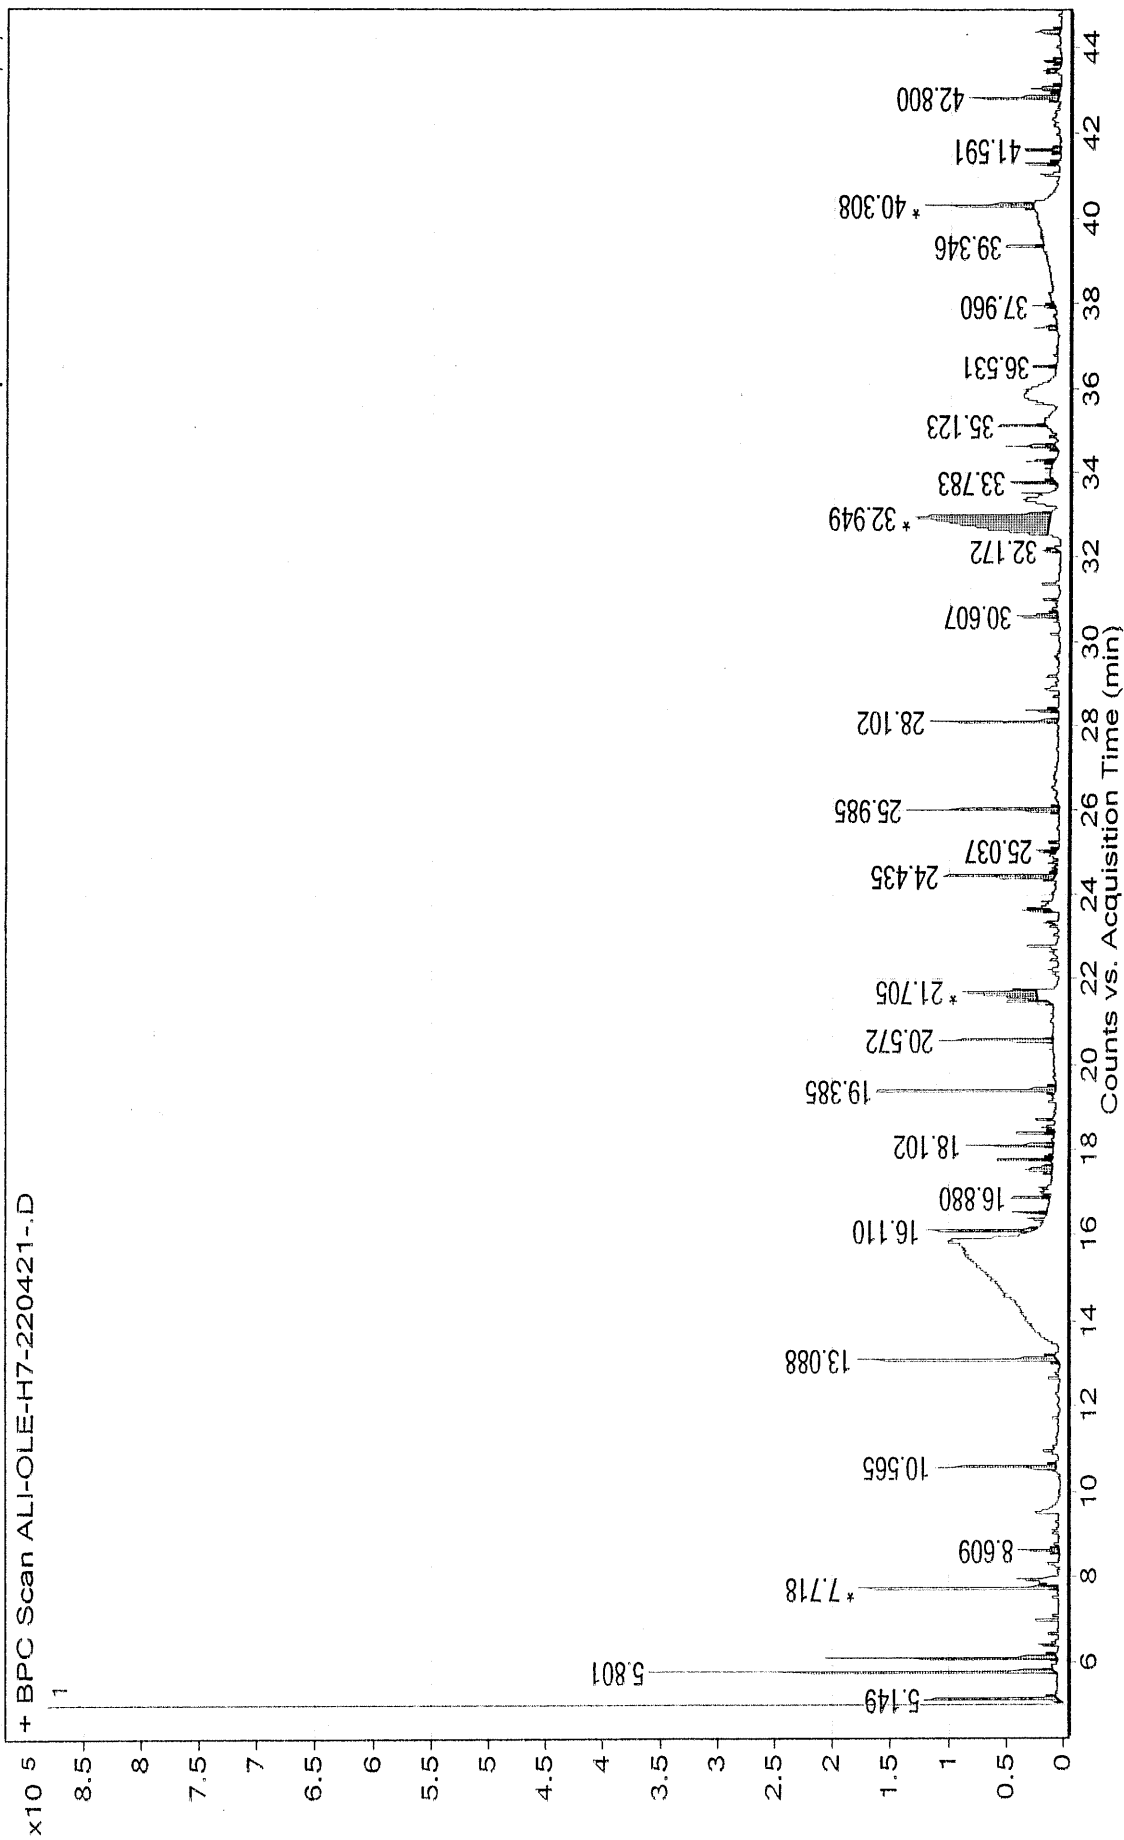

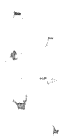

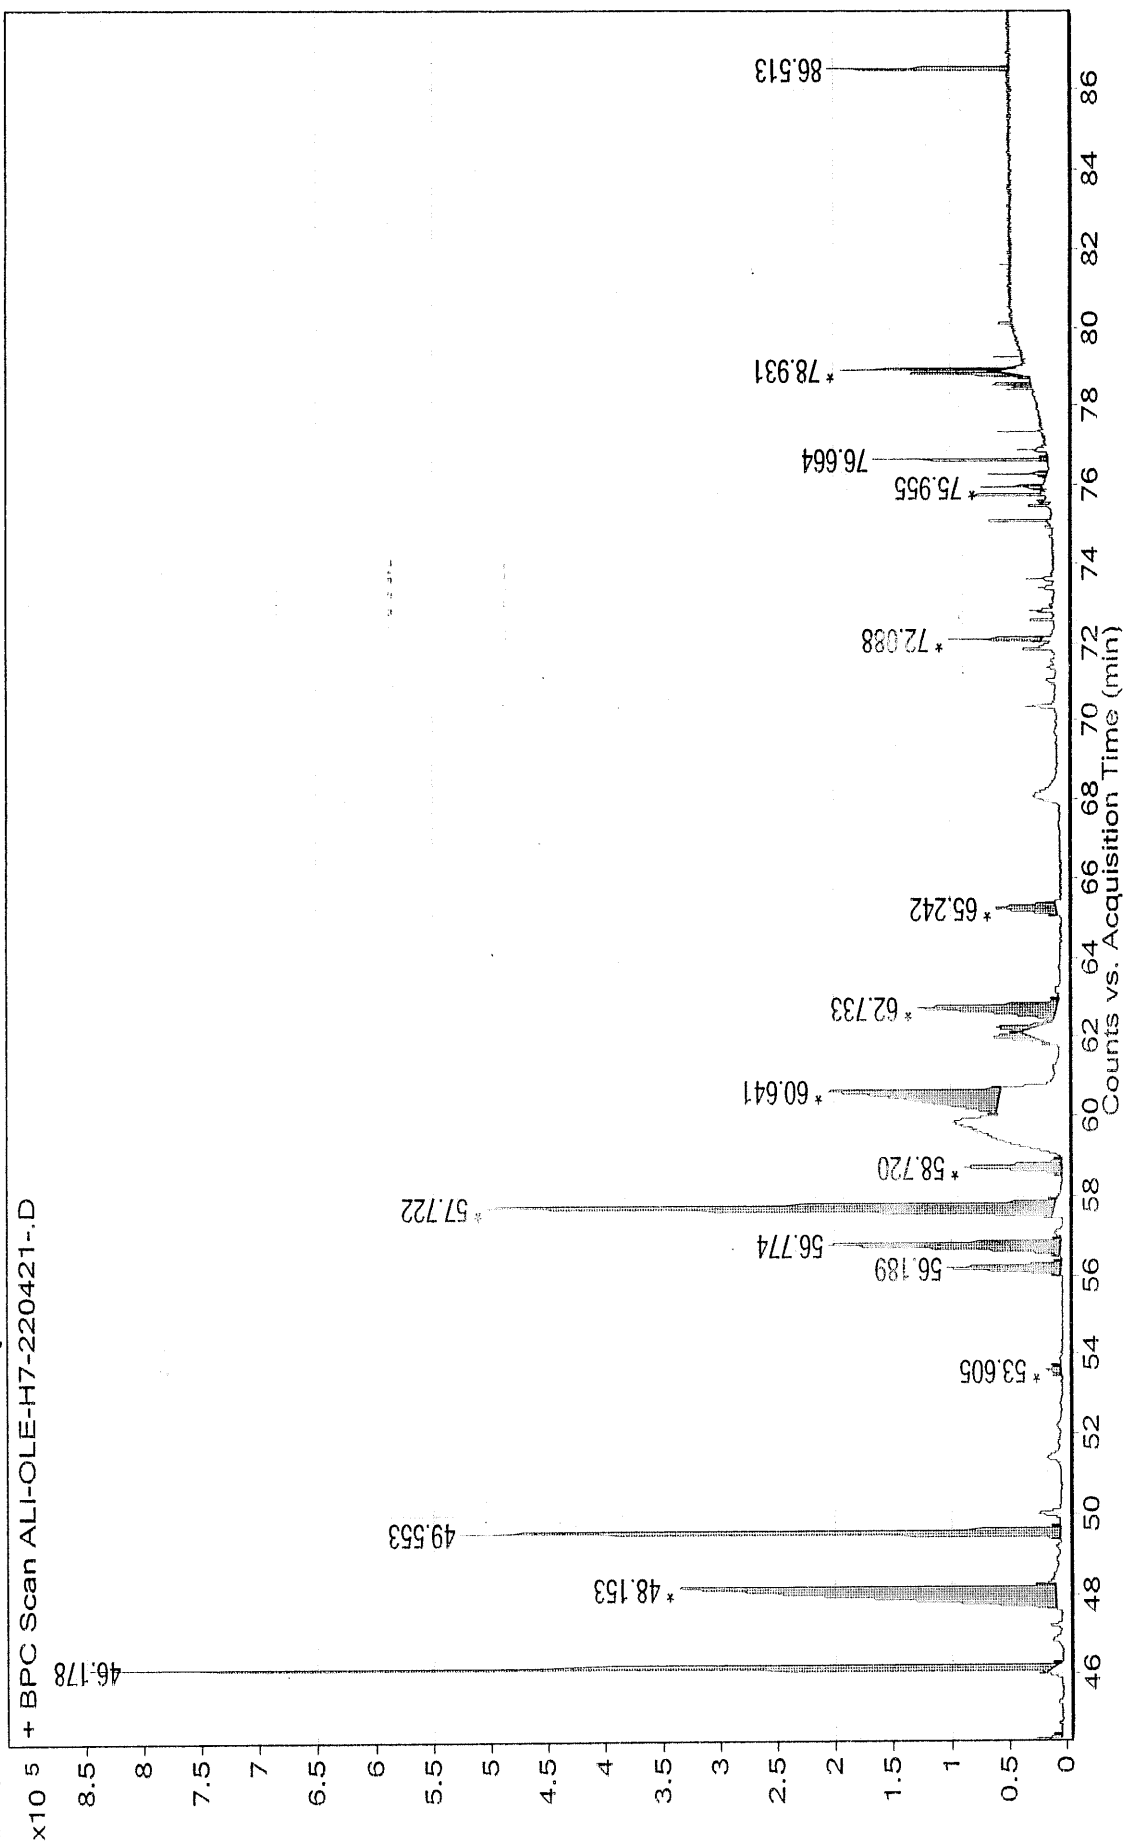

it

PM

## OLE-H7

| Peak Number | RT     | Area    | Area % | Height | Width | Area Sum % | Height % |
|-------------|--------|---------|--------|--------|-------|------------|----------|
| 1           | 5.149  | 410717  | 6.84   | 116555 | 0.171 | 0.94       | 13.91    |
| 2           | 5.801  | 946984  | 15.77  | 352576 | 0.132 | 2.17       | 42.08    |
| 3           | 6.111  | 535451  | 8.92   | 201475 | 0.146 | 1.22       | 24.05    |
| 4           | 7.718  | 481259  | 8.01   | 172052 | 0.103 | 1.1        | 20.53    |
| 5           | 8.609  | 114071  | 1.9    | 35734  | 0.171 | 0.26       | 4.26     |
| 6           | 10.565 | 350011  | 5.83   | 105624 | 0.157 | 0.8        | 12.61    |
| 7           | 13.088 | 580500  | 9.67   | 173624 | 0.185 | 1.33       | 20.72    |
| 8           | 16.11  | 274501  | 4.57   | 94551  | 0.096 | 0.63       | 11.28    |
| 9           | 16.534 | 75490   | 1.26   | 31203  | 0.071 | 0.17       | 3.72     |
| 10          | 16.88  | 79231   | 1.32   | 33785  | 0.071 | 0.18       | 4.03     |
| 11          | 17.543 | 159584  | 2.66   | 23930  | 0.203 | 0.36       | 2.86     |
| 12          | 17.767 | 131423  | 2.19   | 47755  | 0.1   | 0.3        | 5.7      |
| 13          | 18.102 | 241267  | 4.02   | 76368  | 0.128 | 0.55       | 9.11     |
| 14          | 18.398 | 88855   | 1.48   | 32953  | 0.103 | 0.2        | 3.93     |
| 15          | 19.385 | 529896  | 8.82   | 154480 | 0.189 | 1.21       | 18.44    |
| 16          | 20.572 | 342596  | 5.71   | 99582  | 0.143 | 0.78       | 11.89    |
| 17          | 21.47  | 114981  | 1.91   | 35696  | 0.1   | 0.26       | 4.26     |
| 18          | 21.705 | 517610  | 8.62   | 64345  | 0.235 | 1.18       | 7.68     |
| 19          | 23.623 | 81349   | 1.35   | 25498  | 0.078 | 0.19       | 3.04     |
| 20          | 24.435 | 411901  | 6.86   | 97849  | 0.189 | 0.94       | 11.68    |
| 21          | 25.037 | 48147   | 0.8    | 17408  | 0.089 | 0.11       | 2.08     |
| 22          | 25.985 | 404538  | 6.74   | 132529 | 0.146 | 0.92       | 15.82    |
| 23          | 28.102 | 329360  | 5.49   | 110821 | 0.128 | 0.75       | 13.23    |
| 24          | 28.366 | 72137   | 1.2    | 28120  | 0.089 | 0.16       | 3.36     |
| 25          | 30.607 | 165311  | 2.75   | 36361  | 0.178 | 0.38       | 4.34     |
| 26          | 32.172 | 48007   | 0.8    | 14413  | 0.103 | 0.11       | 1.72     |
| 27          | 32.949 | 2080576 | 34.65  | 116905 | 0.552 | 4.76       | 13.95    |
| 28          | 33.783 | 122075  | 2.03   | 40033  | 0.1   | 0.28       | 4.78     |
| 29          | 34.275 | 62809   | 1.05   | 23908  | 0.082 | 0.14       | 2.85     |
| 30          | 34.638 | 149877  | 2.5    | 42947  | 0.16  | 0.34       | 5.13     |
| 31          | 35.123 | 100688  | 1.68   | 41594  | 0.078 | 0.23       | 4.96     |
| 32          | 36.531 | 48951   | 0.82   | 19967  | 0.075 | 0.11       | 2.38     |
| 33          | 37.45  | 60431   | 1.01   | 20607  | 0.096 | 0.14       | 2.46     |
| 34          | 37.96  | 48287   | 0.8    | 19800  | 0.075 | 0.11       | 2.36     |
| 35          | 39.346 | 69926   | 1.16   | 32429  | 0.082 | 0.16       | 3.87     |
| 36          | 40.308 | 368077  | 6.13   | 93655  | 0.153 | 0.84       | 11.18    |
| 37          | 41.292 | 78239   | 1.3    | 27569  | 0.086 | 0.18       | 3.29     |
| 38          | 41.591 | 118170  | 1.97   | 30911  | 0.135 | 0.27       | 3.69     |
| 39          | 42.8   | 321397  | 5.35   | 77885  | 0.178 | 0.73       | 9.3      |
| 40          | 43.024 | 99800   | 1.66   | 25638  | 0.164 | 0.23       | 3.06     |
| 41          | 43.445 | 41353   | 0.69   | 11947  | 0.107 | 0.09       | 1.43     |
| 42          | 43.676 | 63220   | 1.05   | 15146  | 0.171 | 0.14       | 1.81     |
| 43          | 44.382 | 102381  | 1.71   | 23168  | 0.171 | 0.23       | 2.77     |
| 44          | 46.178 | 4770040 | 79.44  | 837860 | 0.235 | 10.91      | 100      |
| 45          | 48.153 | 6004681 | 100    | 326469 | 0.62  | 13.73      | 38.96    |
| 46          | 49.553 | 3648713 | 60.76  | 522211 | 0.314 | 8.34       | 62.33    |
| 47          | 53.605 | 94429   | 1.57   | 13173  | 0.264 | 0.22       | 1.57     |
| 48          | 56.189 | 989765  | 16.48  | 99146  | 0.396 | 2.26       | 11.83    |
| 49          | 56.774 | 2158750 | 35.95  | 201324 | 0.442 | 4.94       | 24.03    |
| 50          | 57.722 | 5687920 | 94.72  | 492581 | 0.495 | 13.01      | 58.79    |

|    |        |         |       |        |       |      |       |
|----|--------|---------|-------|--------|-------|------|-------|
| 51 | 58.72  | 882814  | 14.7  | 84871  | 0.41  | 2.02 | 10.13 |
| 52 | 60.641 | 2653154 | 44.18 | 149019 | 0.659 | 6.07 | 17.79 |
| 53 | 61.999 | 314189  | 5.23  | 33652  | 0.296 | 0.72 | 4.02  |
| 54 | 62.241 | 269887  | 4.49  | 34077  | 0.246 | 0.62 | 4.07  |
| 55 | 62.733 | 1545203 | 25.73 | 120801 | 0.592 | 3.53 | 14.42 |
| 56 | 65.242 | 564707  | 9.4   | 51598  | 0.356 | 1.29 | 6.16  |
| 57 | 72.088 | 298458  | 4.97  | 81216  | 0.114 | 0.68 | 9.69  |
| 58 | 75.955 | 144881  | 2.41  | 52270  | 0.1   | 0.33 | 6.24  |
| 59 | 76.286 | 121572  | 2.02  | 50804  | 0.089 | 0.28 | 6.06  |
| 60 | 76.664 | 406628  | 6.77  | 151098 | 0.111 | 0.93 | 18.03 |
| 61 | 78.824 | 392137  | 6.53  | 84821  | 0.125 | 0.9  | 10.12 |
| 62 | 78.931 | 360383  | 6     | 142187 | 0.111 | 0.82 | 16.97 |
| 63 | 86.513 | 677962  | 11.29 | 157009 | 0.139 | 1.55 | 18.74 |
| 64 | 90.376 | 128620  | 2.14  | 29812  | 0.164 | 0.29 | 3.56  |
| 65 | 92.251 | 147538  | 2.46  | 31199  | 0.171 | 0.34 | 3.72  |

99.96



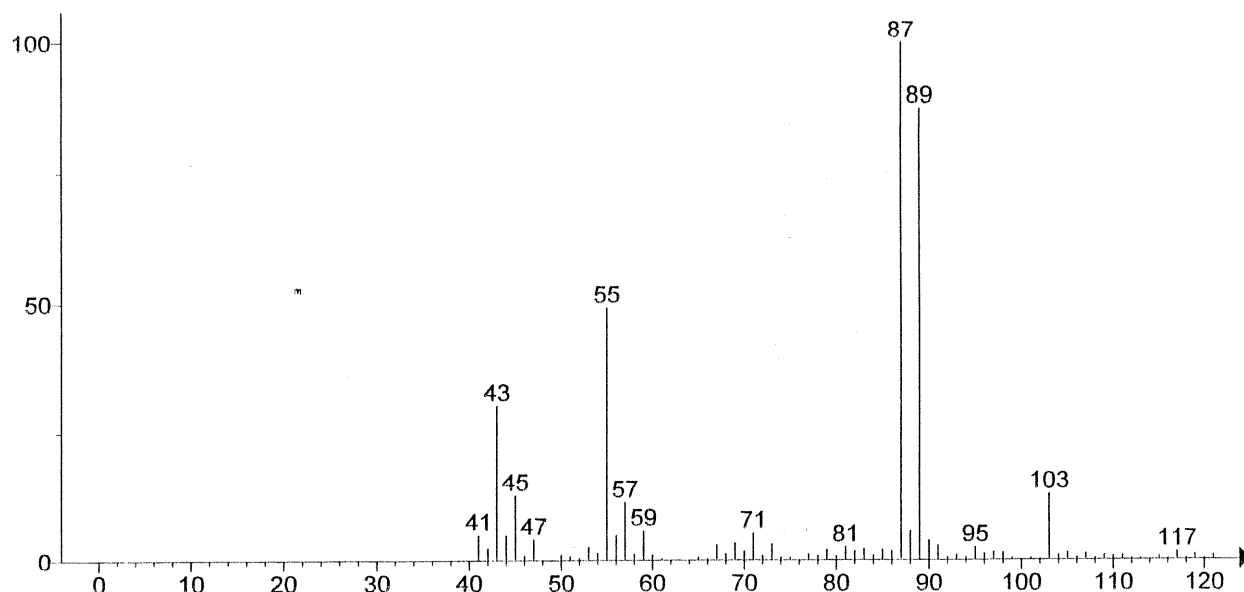

(Text File) +EI Scan (5.149 min) ALI-OLE-H7-220421-.D

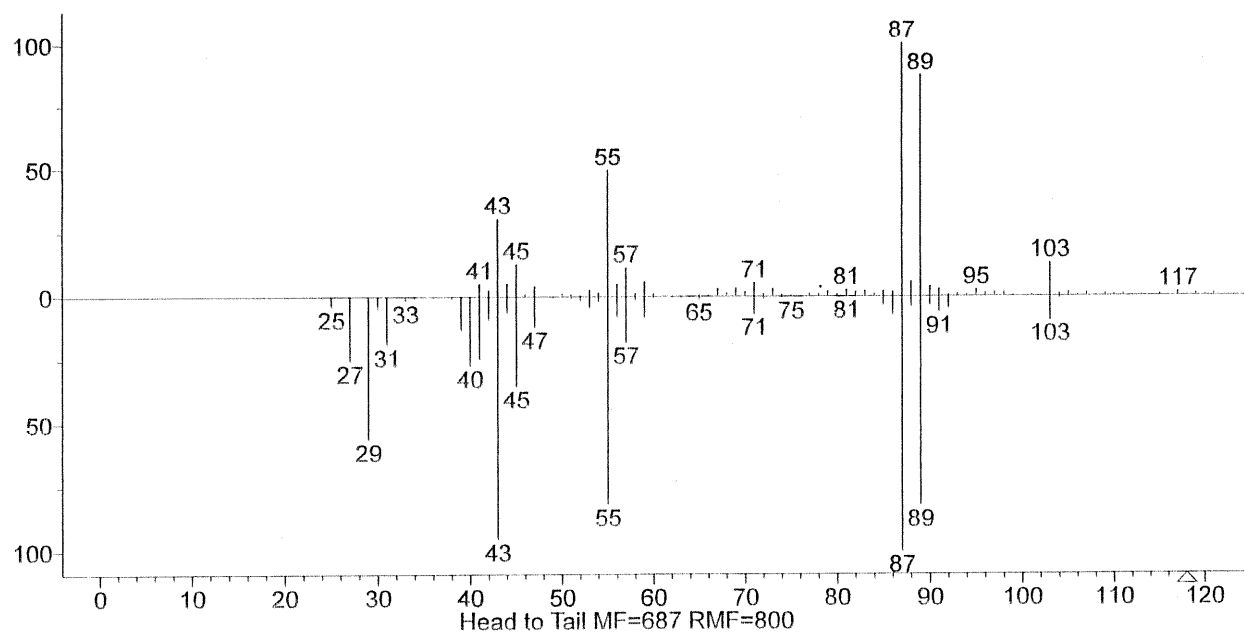

Head to Tail MF=687 RMF=800

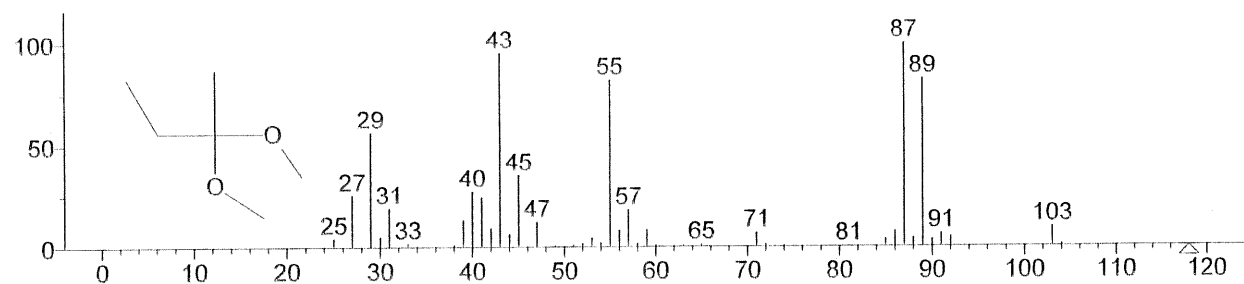

(mainlib) 2,2-Dimethoxybutane

Name: 2,2-Dimethoxybutane

Formula: C<sub>6</sub>H<sub>14</sub>O<sub>2</sub>

MW: 118 CAS#: 3453-99-4 NIST#: 250250 ID#: 48775 DB: mainlib

Other DBs: None

Contributor: TNO Volatile Compounds in Food - Chemical Concepts

10 largest peaks:

87 999 | 43 950 | 89 822 | 55 817 | 29 560 | 45 351 | 40 270 | 27 251 | 41 242 | 31 188 |

Synonyms:

no synonyms.

Estimated non-polar retention index (n-alkane scale):

Value: 685 iu

Confidence interval (Ethers): 68(50%) 293(95%) iu

Retention index.

1. Value: 748.5 iu

Column Type: Capillary

Column Class: Semi-standard non-polar

Active Phase: SE-54

Column

Length: 30 m

Carrier Gas: He

Column Diameter: 0.25 mm

Phase Thickness: 0.25 µm

Data Type: Normal

alkane RI

Program Type: Complex

Description: 40C(5min) => 4C/min => 230C(20min) => 5C/min => 280C (5min)

Source: Gao, H.; Zhao, T.; Kong, Q.; Chen, X.; Hu, Z., Analysis of unknown organic pollutants in sewage by solid-phase extraction combined with gas chromatography-mass spectrometry, J. Chromatogr. Sci., 42, 2004, 91-99.

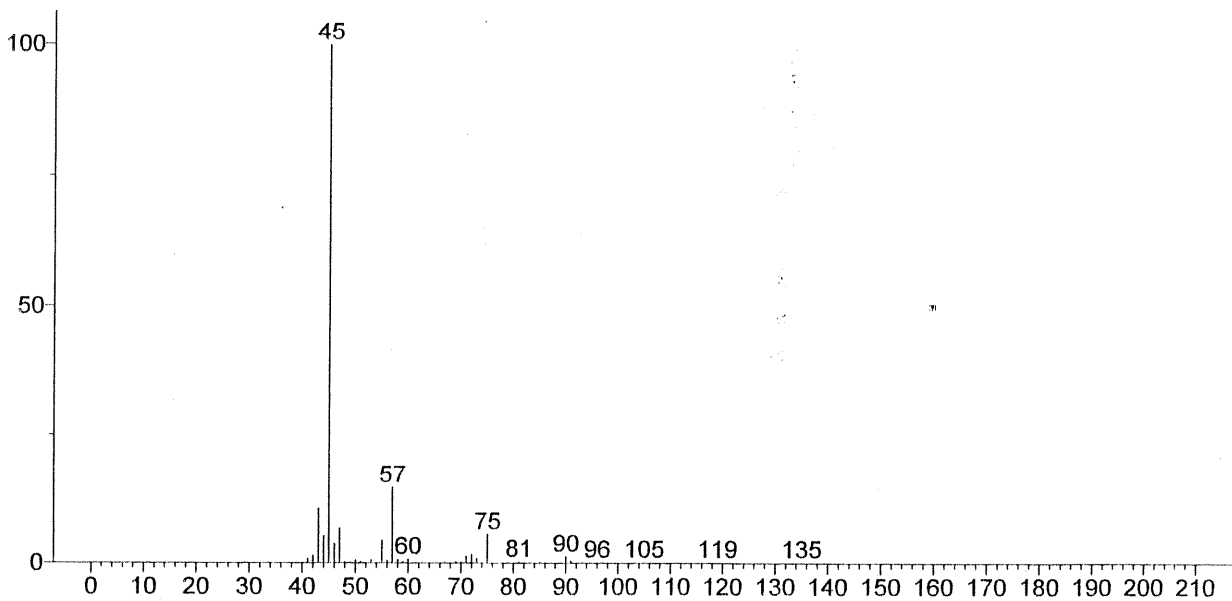

(Text File) +EI Scan (5.804 min) ALI-OLE-H7-220421-.D

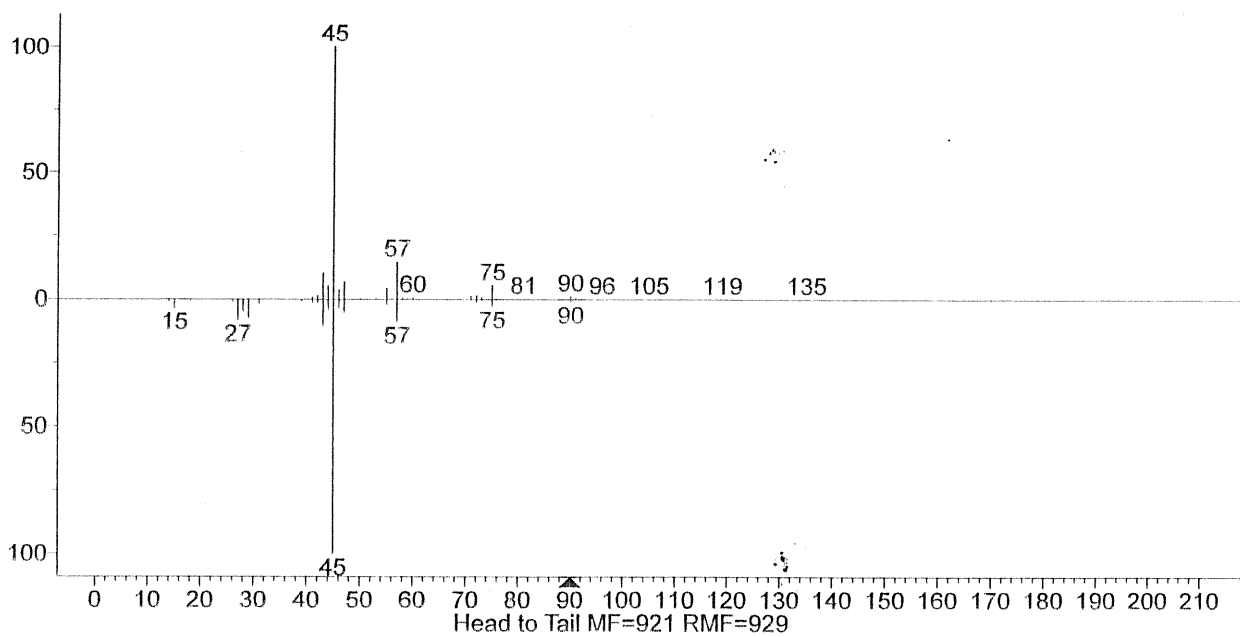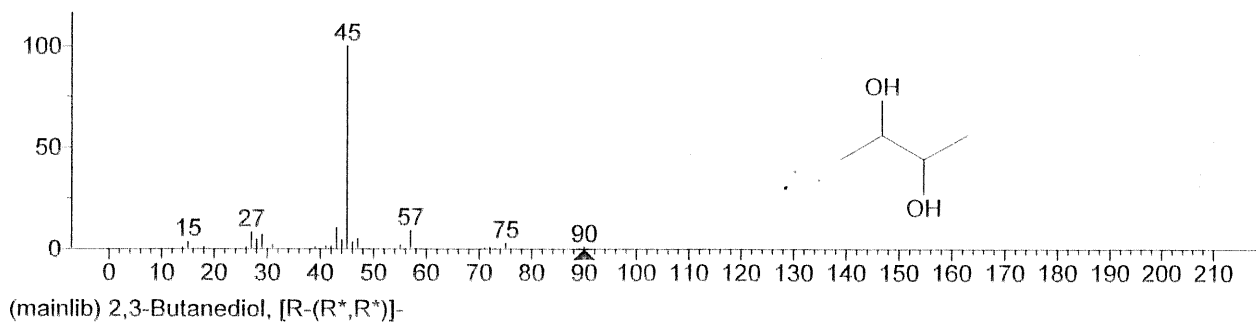

(mainlib) 2,3-Butanediol, [R-(R\*,R\*)]-

Name: 2,3-Butanediol, [R-(R\*,R\*)]-

Formula: C<sub>4</sub>H<sub>10</sub>O<sub>2</sub>

MW: 90 CAS#: 24347-58-8 NIST#: 235815 ID#: 15312 DB: mainlib

Other DBs: HODOC, EINECS

Contributor: Japan AIST/NIMC Database- Spectrum MS-NW-6416

10 largest peaks:

45 999 | 43 104 | 57 89 | 27 82 | 29 71 | 47 51 | 28 46 | 44 45 | 15 35 | 46 34 |

Synonyms:

1,2,3-Butanediol #

Estimated non-polar retention index (n-alkane scale):

Value: 743 iu

Confidence interval (Alcohols): 41(50%) 176(95%) iu

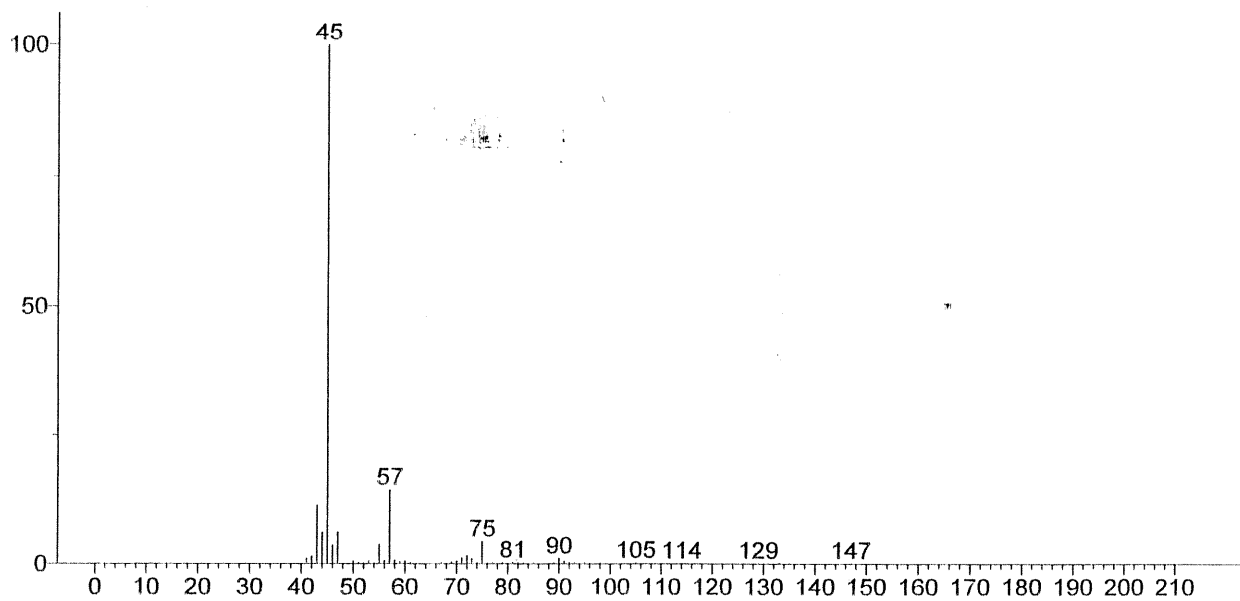

(Text File) +EI Scan (6.111 min) ALI-OLE-H7-220421-.D

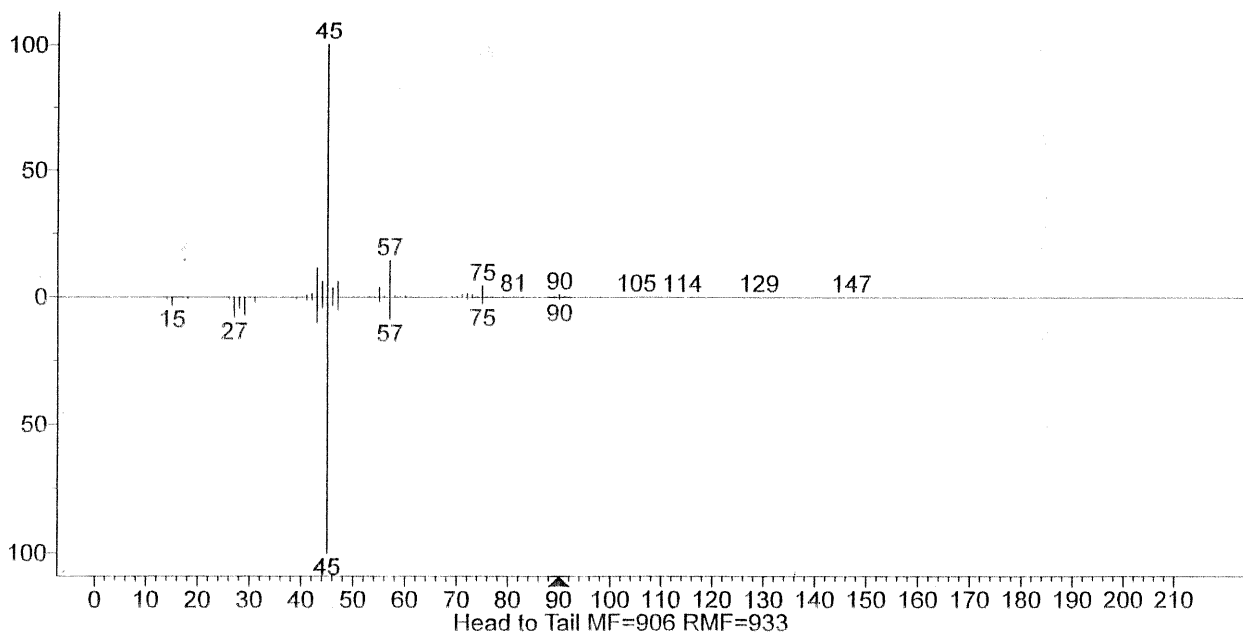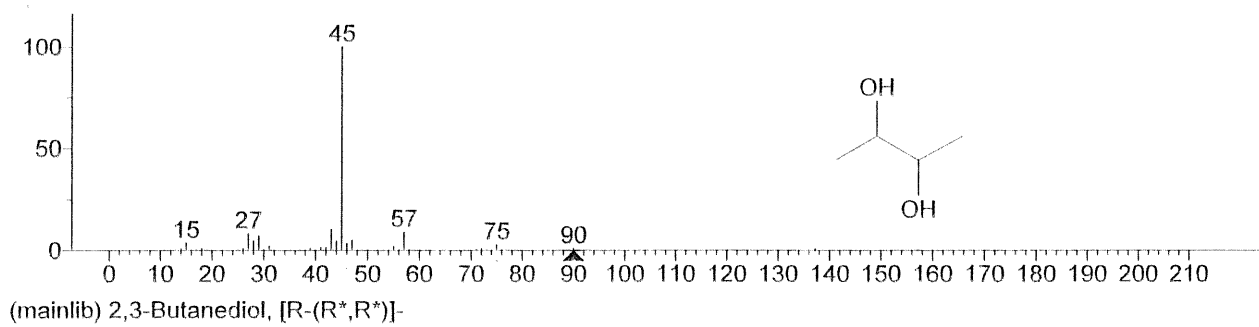

(mainlib) 2,3-Butanediol, [R-(R\*,R\*)]-

Name: 2,3-Butanediol, [R-(R\*,R\*)]-

Formula: C<sub>4</sub>H<sub>10</sub>O<sub>2</sub>

MW: 90 CAS#: 24347-58-8 NIST#: 235815 ID#: 15312 DB: mainlib

Other DBs: HODOC, EINECS

Contributor: Japan AIST/NIMC Database- Spectrum MS-NW-6416

10 largest peaks:

45 999 | 43 104 | 57 89 | 27 82 | 29 71 | 47 51 | 28 46 | 44 45 | 15 35 | 46 34 |

Synonyms:

1.2,3-Butanediol #

Estimated non-polar retention index (n-alkane scale):

Value: 743 iu

Confidence interval (Alcohols): 41(50%) 176(95%) iu

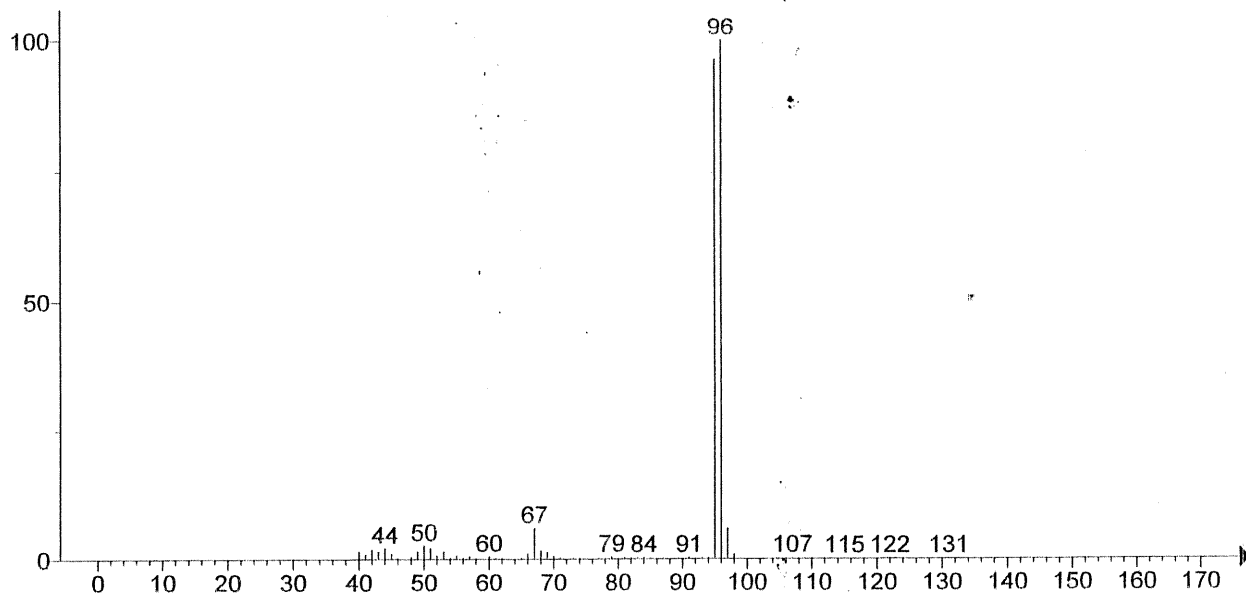

(Text File) +EI Scan (7.718 min) ALI-OLE-H7-220421-.D

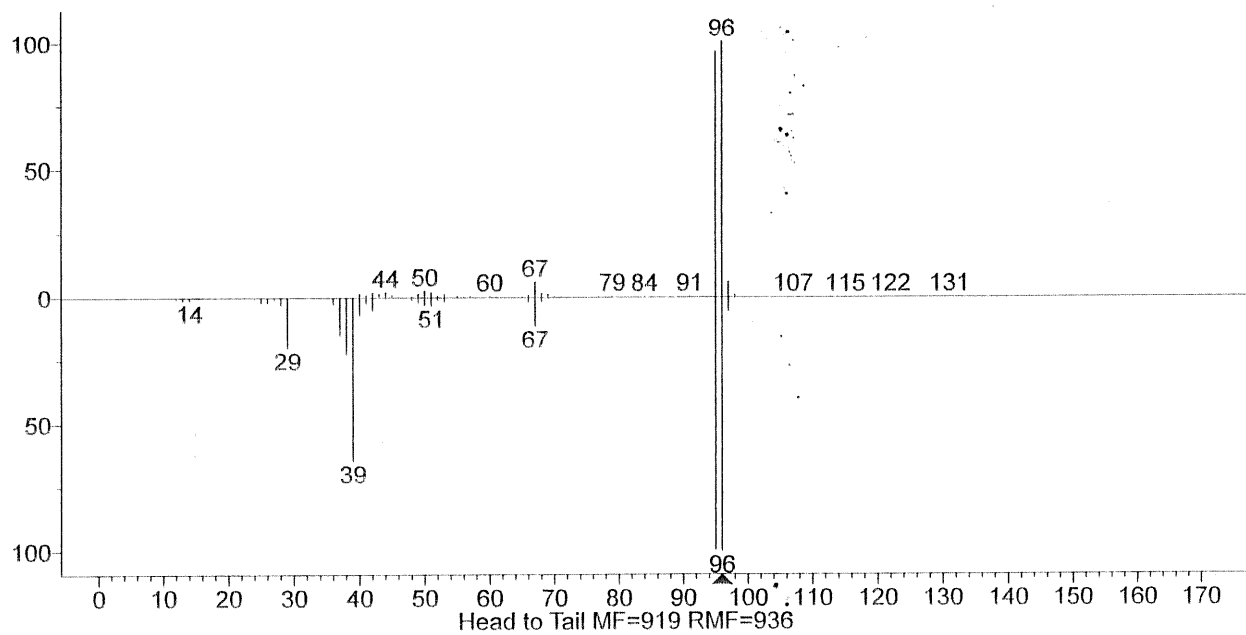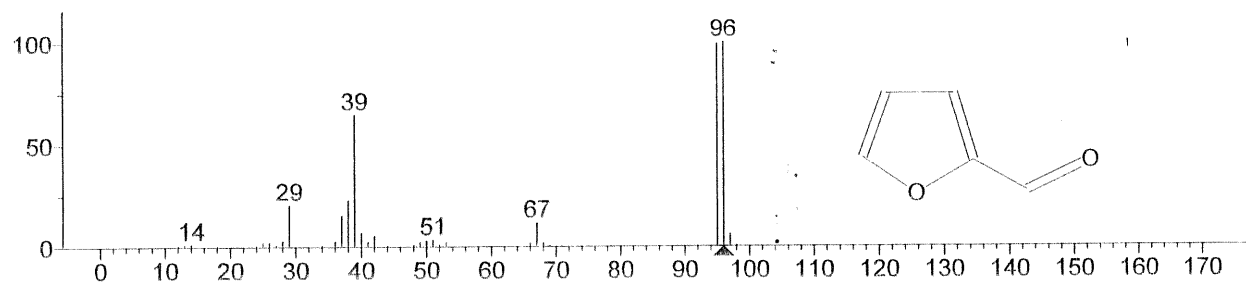

(mainlib) Furfural

Name: Furfural

Formula: C<sub>5</sub>H<sub>4</sub>O<sub>2</sub>

MW: 96 CAS#: 98-01-1 NIST#: 118785 ID#: 59378 DB: mainlib

Other DBs: Fine, TSCA, RTECS, EPA, HODOC, NIH, EINECS, IRDB

Contributor: NIST Mass Spectrometry Data Center, 1990.

10 largest peaks:

96 999 | 95 991 | 39 644 | 38 226 | 29 201 | 37 151 | 67 114 | 40 69 | 97 57 | 42 53 |

Synonyms:

1.2-Furancarboxaldehyde

2.2-Furaldehyde

3.α-Furole

4.Artificial ant oil

5.Fural

6.Furaldehyde

7.Furale

8.Furancarbonal

9.Furfuraldehyde

10.Furfurole

11.Furfurylaldehyde

12.Furole

13.Pyromucic aldehyde

14.2-Formylfuran

15.2-Furanaldehyde

16.2-Furancarbonal

17.2-Furfural

18.2-Furfuraldehyde

19.2-Furylaldehyde

20.Furol

21.2-Furylmethanal

22.Artificial oil of ants

23.Furfurale

24.Furfurol

25.Nci-C56177

26.2-Furil-metanale

27.2-Furankarbaldehyd

28.Furfuralu

29.Rcra waste number U125

30.UN 1199

31.2-Furylaldehyde xypropane

32.2-Furylcarboxaldehyde

33.Cyclic aldehyde

34.Qo furfural

Estimated non-polar retention index (n-alkane scale):

Value: 831 iu

Confidence interval (Diverse functional groups): 89(50%) 382(95%) iu

Retention index.

1. Value: 794 iu

Column Type: Capillary

Column Class: Standard non-polar

Active Phase: CP Sil 5 CB

Column

Length: 60 m



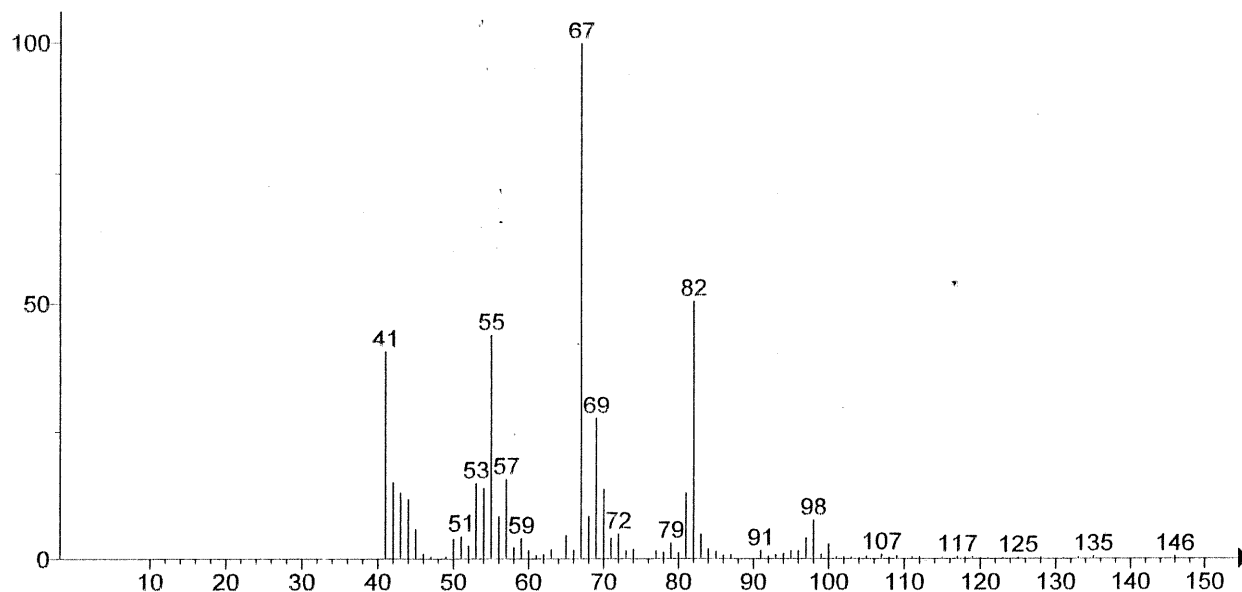

(Text File) +EI Scan (8.609 min) ALI-OLE-H7-220421-.D

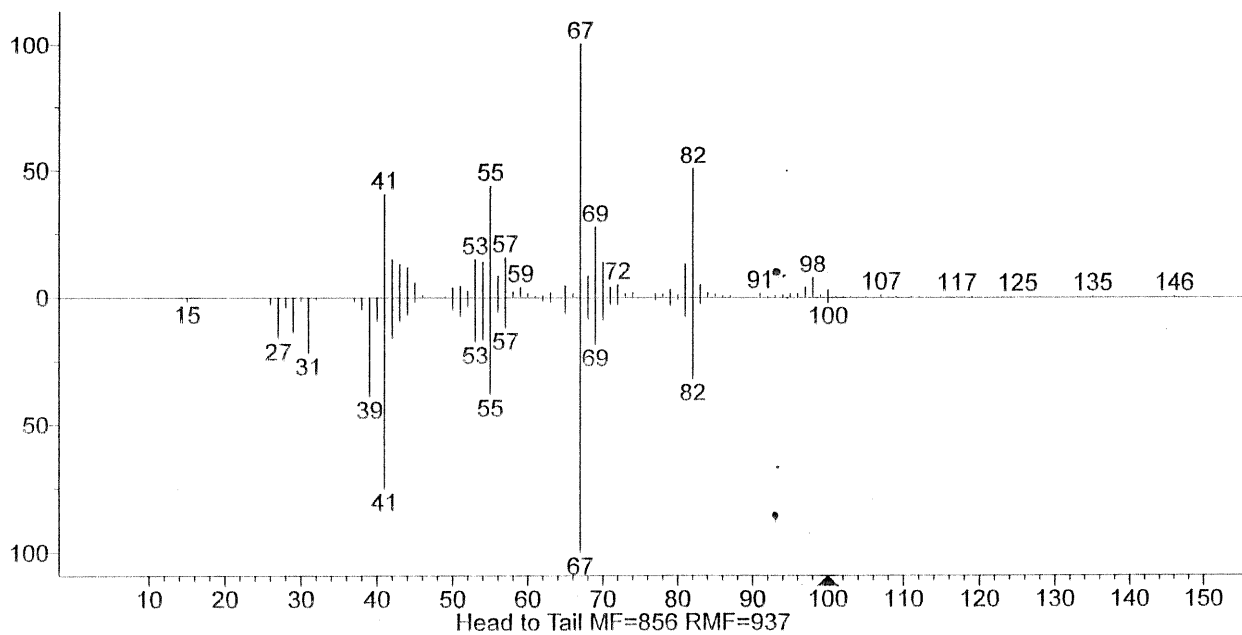

Head to Tail MF=856 RMF=937

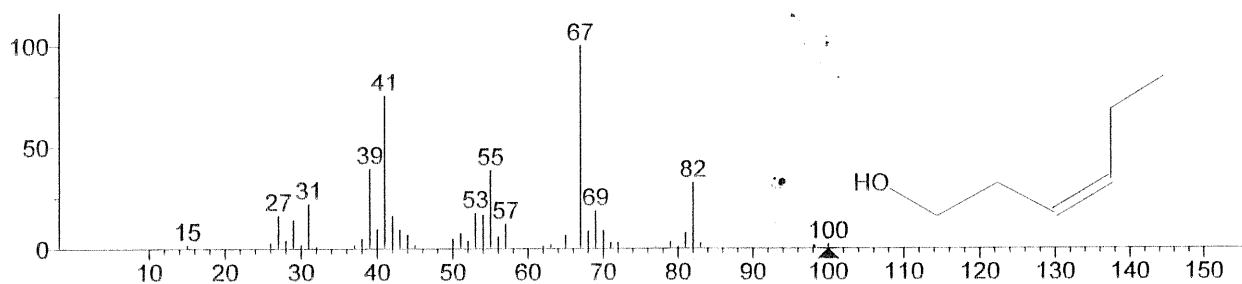

(mainlib) 3-Hexen-1-ol, (Z)-

Name: 3-Hexen-1-ol, (Z)-

Formula: C<sub>6</sub>H<sub>12</sub>O

MW: 100 CAS#: 928-96-1 NIST#: 114154 ID#: 28426 DB: mainlib

Other DBs: TSCA, RTECS, HODOC, NIH, EINECS, IRDB

Contributor: NIST Mass Spectrometry Data Center, 1990.

10 largest peaks:

67 999 | 41 750 | 39 390 | 55 382 | 82 321 | 31 218 | 69 184 | 53 174 | 54 164 | 27 161 |

Synonyms:

1. (Z)-Hex-3-en-1-ol
2. cis-3-Hexen-1-ol
3. cis-3-Hexene-1-ol
4. cis-3-Hexenol
5. Blatteralkohol (German)
6. Leaf alcohol
7. Z-3-Hexenol
8. 3-(Z)-Hexenol
9. β,γ-Hexenol
10. Blatteralkohol
11. Hexen-30L-1
12. 3-Hexen-1-ol
13. 3-Hexen-1-ol, cis-
14. 3-Hexenol, cis-
15. (3Z)-3-Hexen-1-ol #

Estimated non-polar retention index (n-alkane scale):

Value: 868 iu

Confidence interval (Alcohols): 41(50%) 176(95%) iu

Retention index.

1. Value: 838 iu

Column Type: Capillary

Column Class: Standard non-polar

Active Phase: HP-101

Column

Length: 25 m

Carrier Gas: He

Column Diameter: 0.2 mm

Phase Thickness: 0.2 μm

Data Type: Linear

RI

Program Type: Ramp

Start T: 70 C

End T: 200 C

Heat Rate: 3 K/min

Start Time: 2 min

End Time: 15

min

Source: Politeo, O.; Jukic, M.; Milos, M., Chemical composition and antioxidant capacity of free volatile aglycones from basil (*Ocimum basilicum* L.) compared with its essential oil, Food Chem., 101, 2007, 379-385.

2.

Value: 872 iu

Column Type: Capillary

Column Class: Standard non-polar

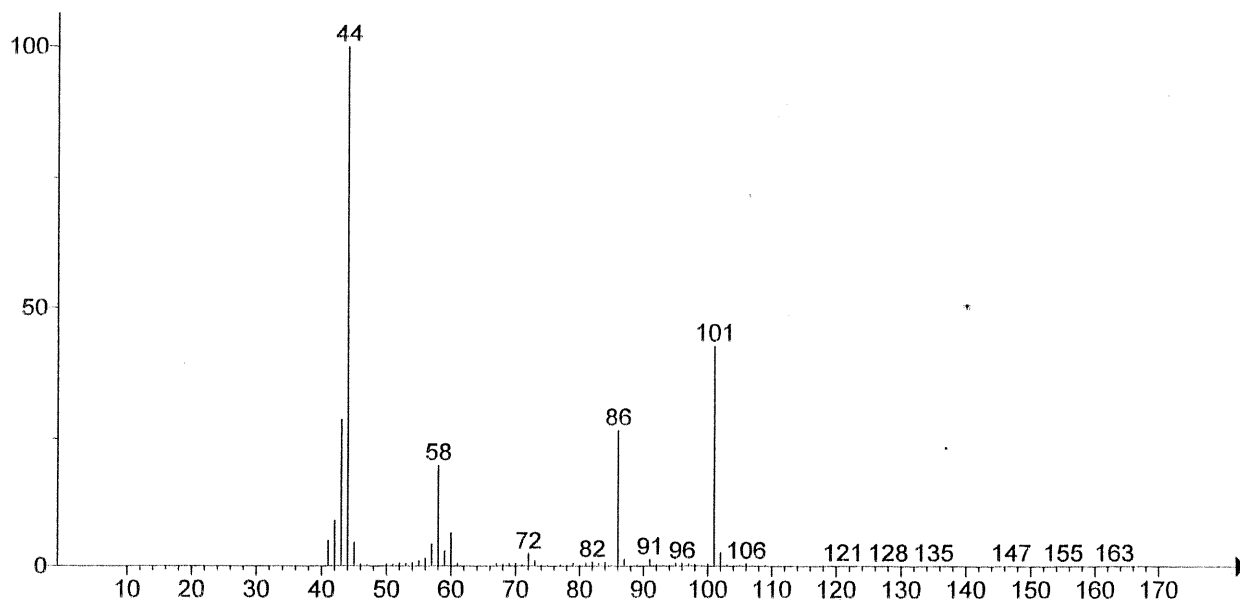

(Text File) +EI Scan (10.562 min) ALI-OLE-H7-220421-D

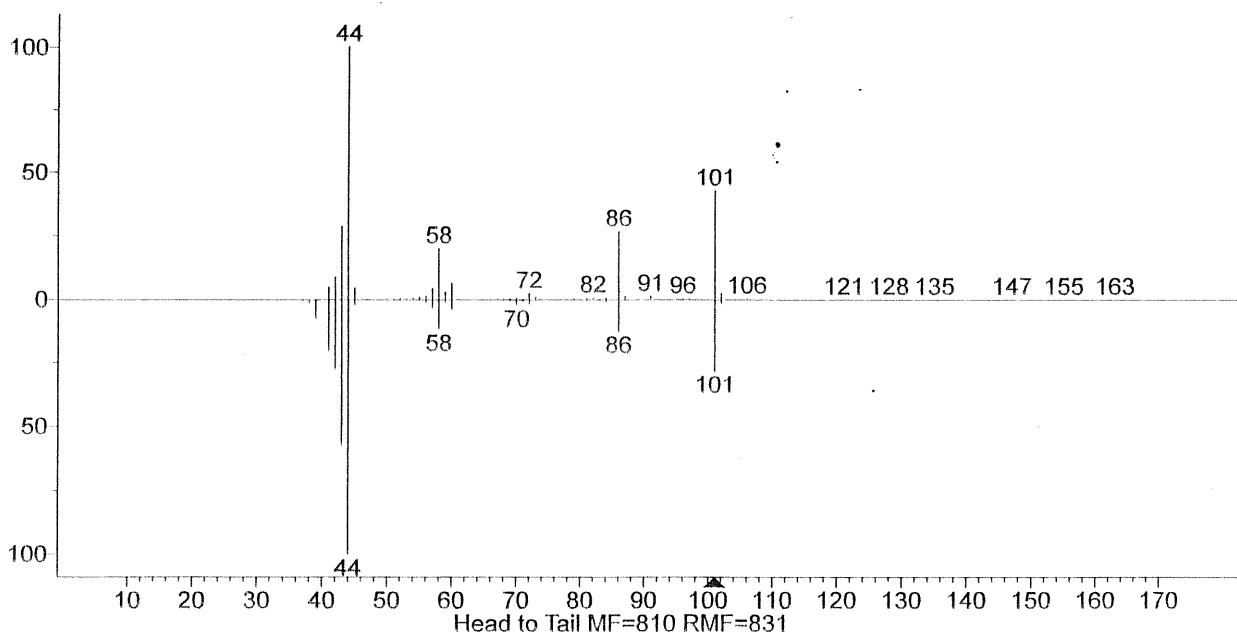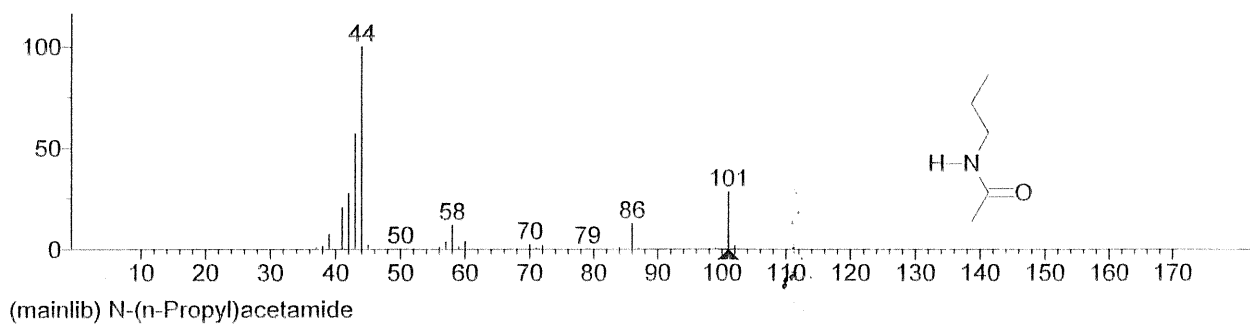

(mainlib) N-(n-Propyl)acetamide

Name: N-(n-Propyl)acetamide

Formula: C<sub>5</sub>H<sub>11</sub>NO

MW: 101 CAS#: 5331-48-6 NIST#: 223038 ID#: 13993 DB: mainlib

Other DBs: Fine, EINECS

Contributor: Chemical Concepts

10 largest peaks:

44 999 | 43 571 | 101 283 | 42 274 | 41 203 | 86 126 | 58 118 | 39 74 | 60 39 | 57 35 |

Synonyms:

1. Acetamide, N-propyl-

2. N-Propylacetamide

3. Acetamide, N-n-propyl-,

Estimated non-polar retention index (n-alkane scale):

Value: 918 iu

Confidence interval (Nitrogen-containing): 83(50%) 356(95%) iu

Retention index.

1. Value: 974 iu

Column Type: Packed

Column Class: Standard non-polar

Active Phase: SE-30

Column Length:

1 m

Carrier Gas: N<sub>2</sub>

Substrate: Chromosorb W AW

Data Type: Kovats RI

Program Type: Isothermal

Start T:

180 C

Source: Krawczyk, W.; Piotrowski, G.T., Relationships Between Structure and Retention Index for N-Substituted Amides of Aliphatic Acids on a Non-Polar Column, J. Chromatogr., 463, 1989, 297-304.

2. Value: 974

iu

Column Type: Capillary

Column Class: Standard non-polar

Active Phase: Polydimethyl siloxanes

Data Type:

Normal alkane RI

Program Type: Ramp

Source: Zenkevich, I.G.; Chupalov, A.A., New Possibilities of Chromato

Mass Pectrometric Identification of Organic Compounds Using Increments of Gas Chromatographic Retention Indices of Molecular Structural Fragments, Zh. Org. Khim. (Rus.), 32(5), 1996, 656-666, In original 656-666.

<...

>

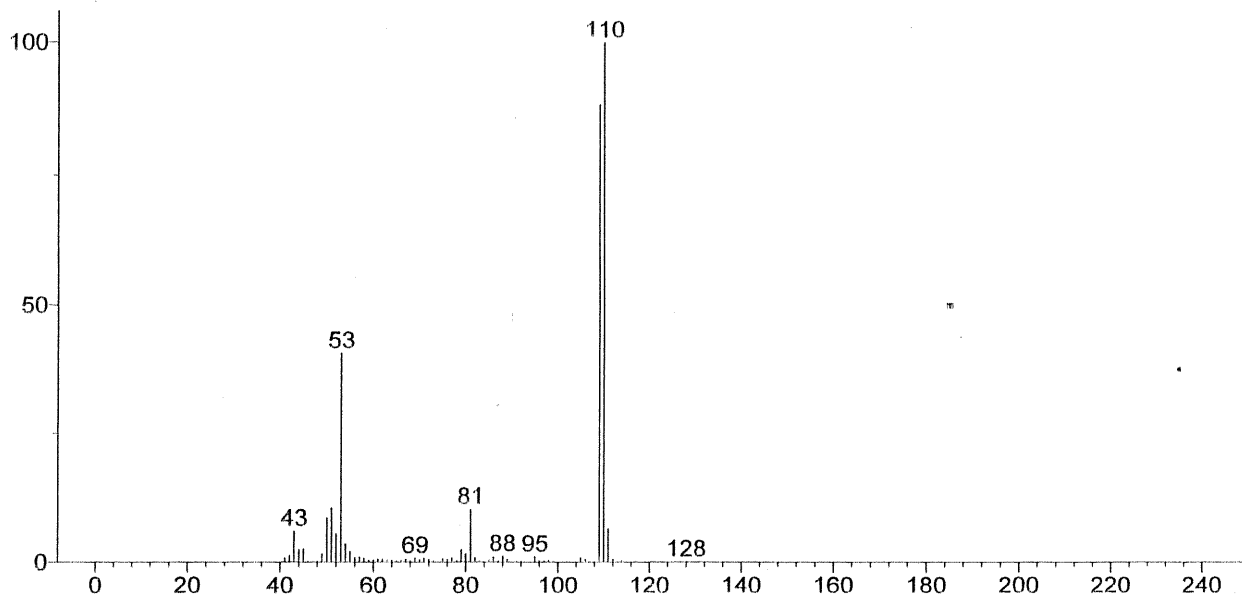

(Text File) +EI Scan (13.092 min) ALI-OLE-H7-220421-.D

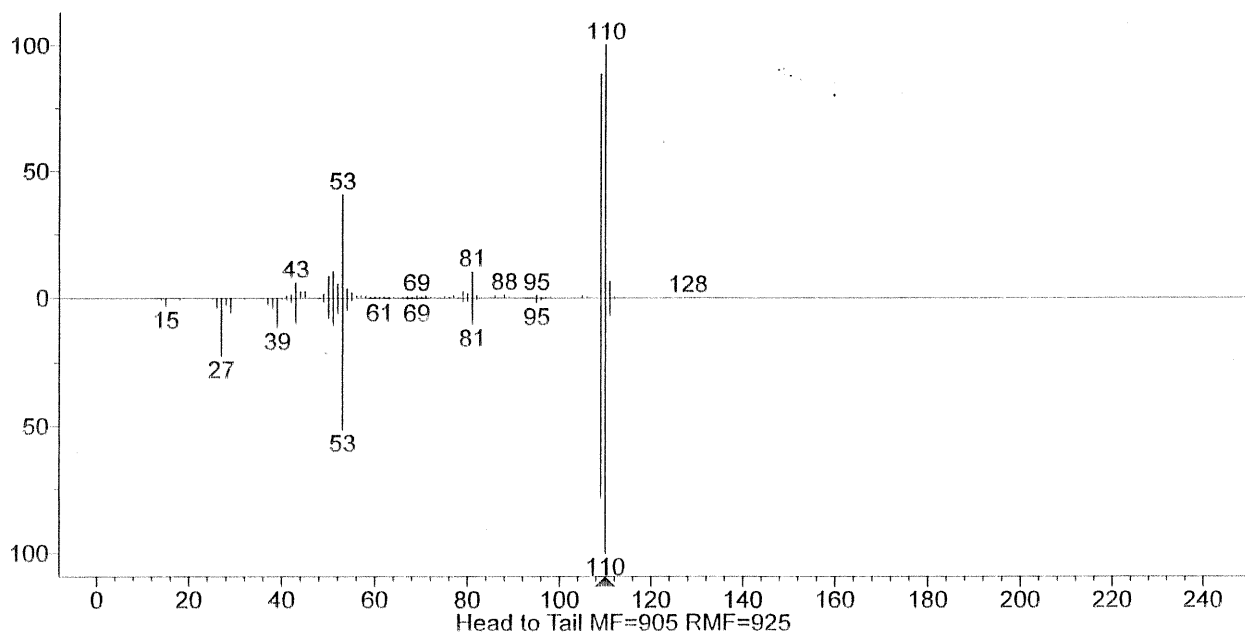

Head to Tail MF=905 RMF=925

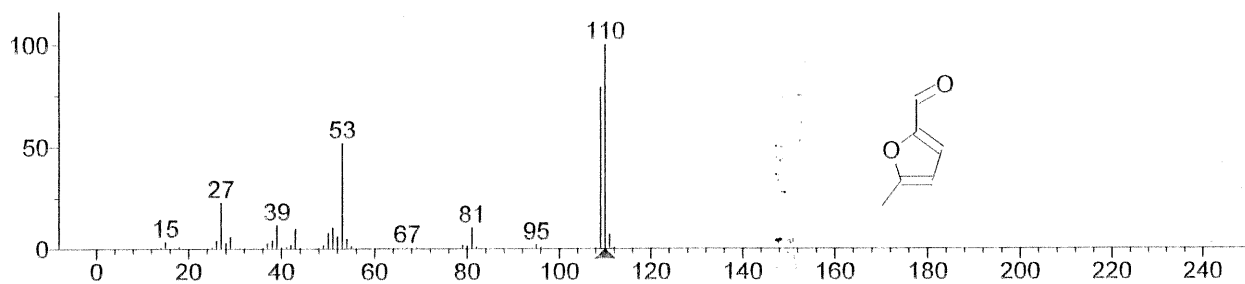

(mainlib) 2-Furancarboxaldehyde, 5-methyl-

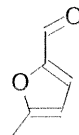

Name: 2-Furancarboxaldehyde, 5-methyl-

Formula: C<sub>6</sub>H<sub>6</sub>O<sub>2</sub>

MW: 110 CAS#: 620-02-0 NIST#: 233793 ID#: 74019 DB: mainlib

Other DBs: Fine, TSCA, RTECS, HODOC, EINECS, IRDB

Contributor: Japan AIST/NIMC Database- Spectrum MS-NW-1340

10 largest peaks:

110 999 | 109 788 | 53 515 | 27 225 | 39 115 | 51 104 | 81 102 | 43 97 | 50 77 | 111 69 |

Synonyms:

1.2-Furaldehyde, 5-methyl-

2.Furfural, 5-methyl-

3.2-Formyl-5-methylfuran

4.2-Methyl-5-formylfuran

5.5-Methyl-2-furaldehyde

6.5-Methyl-2-furancarboxaldehyde

7.5-Methyl-2-furfural

8.5-Methylfurfural

9.5-Methylfurfuraldehyde

10.5-Methyl furfural

Estimated non-polar retention index (n-alkane scale):

Value: 920 iu

Confidence interval (Diverse functional groups): 89(50%) 382(95%) iu

Retention index.

1. Value: 924 iu

Column Type: Capillary

Column Class: Standard non-polar

Active Phase: CP Sil 5 CB

Column

Length: 50 m

Carrier Gas: He

Column Diameter: 0.32 mm

Phase Thickness: 0.4 um

Data Type: Linear

RI

Program Type: Ramp

Start T: 60 C

End T: 280 C

Heat Rate: 3 K/min

Start Time: 10 min

End Time: 60

min

Source: Pino, J.A.; Marbot, R.; Vázquez, C., Characterization of volatile in Cosa Rican Guava [*Psidium friedrichsthalianum* (Berg) Niedenzu] fruit, J. Agric. Food Chem., 50, 2002, 6023-6026.

2. Value: 926 iu

Column

Type: Capillary

Column Class: Standard non-polar

Active Phase: SPB-1

Column Length: 60 m

Carrier Gas:

N<sub>2</sub>

Column Diameter: 0.32 mm

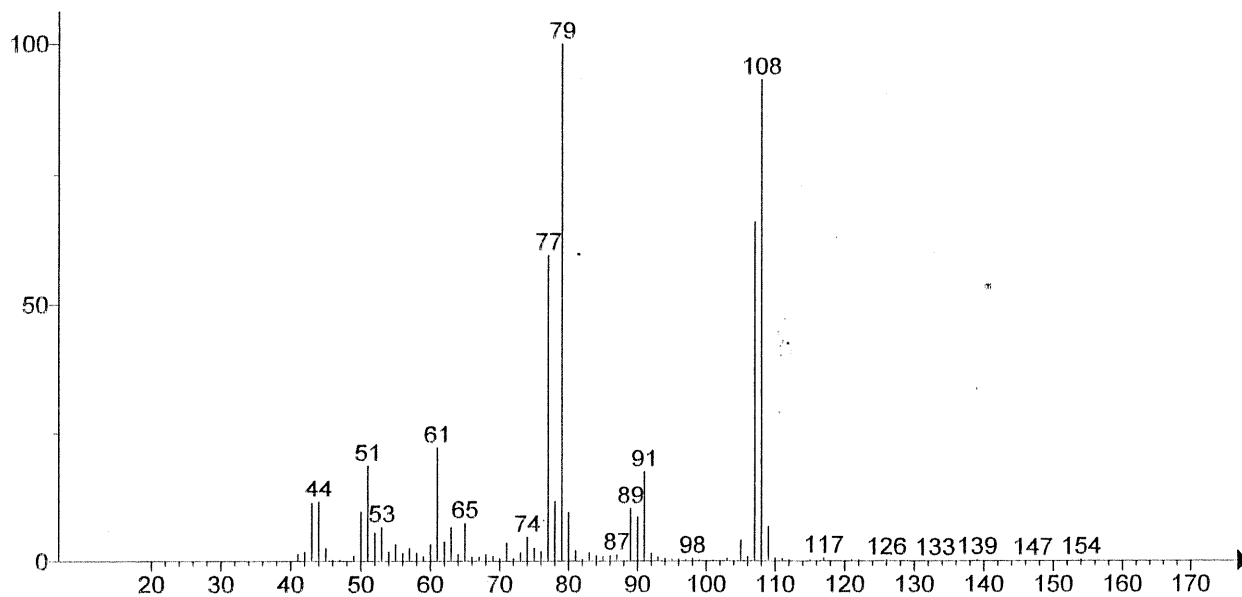

(Text File) +EI Scan (16.110 min) ALI-OLE-H7-220421-.D

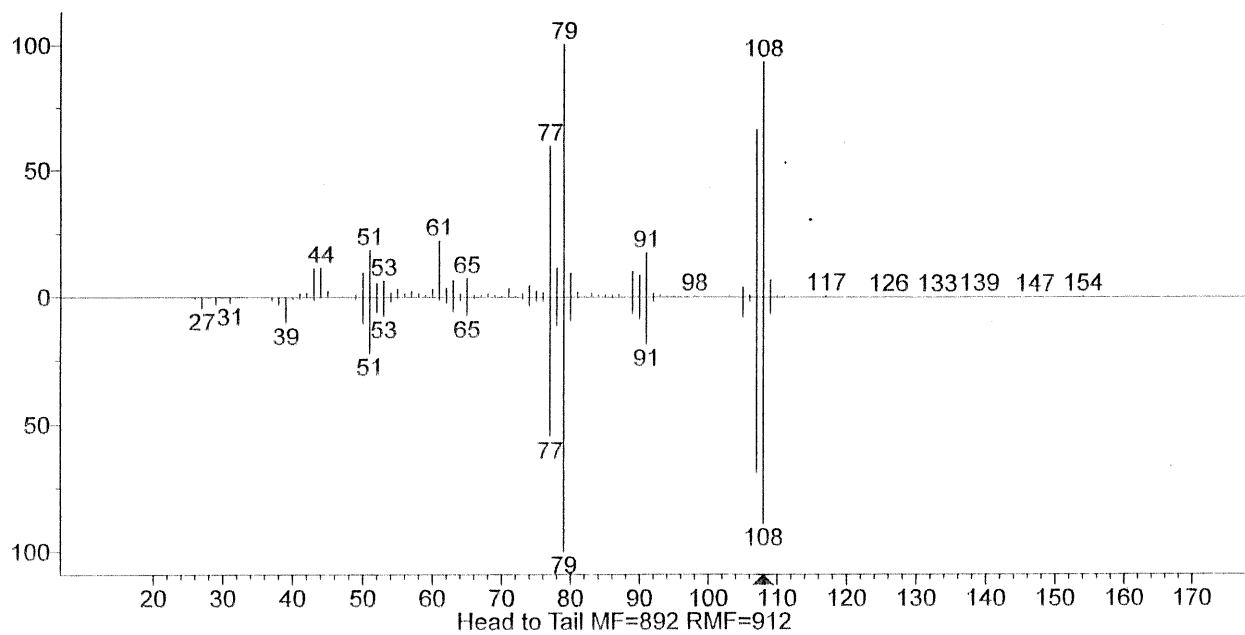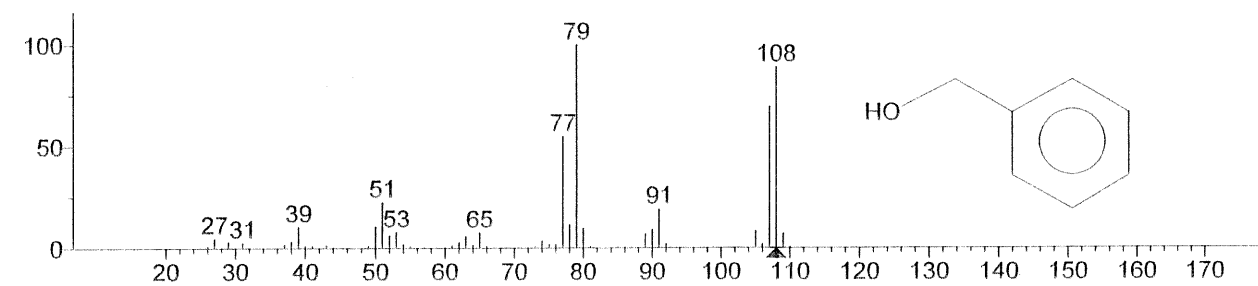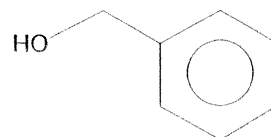

(mainlib) Benzyl Alcohol

Name: Benzyl Alcohol

Formula: C<sub>7</sub>H<sub>8</sub>O

MW: 108 CAS#: 100-51-6 NIST#: 151560 ID#: 42192 DB: mainlib

Other DBs: Fine, TSCA, RTECS, EPA, USP, HODOC, NIH, EINECS, IRDB

Contributor: Chemical Concepts

10 largest peaks:

79 999 | 108 890 | 107 692 | 77 547 | 51 222 | 91 187 | 78 113 | 50 104 | 39 102 | 80 95 |

Synonyms:

1. Benzenemethanol
2.  $\alpha$ -Hydroxytoluene
3.  $\alpha$ -Toluenol
4. (Hydroxymethyl)benzene
5. Benzenecarbinol
6. Phenylcarbinol
7. Phenylmethanol
8. Phenylmethyl alcohol
9. Methanol, phenyl-
10. NCI-C06111
11. Hydroxytoluene
12. Benzylalcohol
13. Bentalol
14. Benzoyl alcohol

Estimated non-polar retention index (n-alkane scale):

Value: 1036 iu

Confidence interval (Alcohols): 41(50%) 176(95%) iu

Retention index.

1. Value: 1005.7 iu

Column Type: Capillary

Column Class: Standard non-polar

Active Phase: DB-Petro

Column

Length: 50 m

Column Diameter: 0.2 mm

Phase Thickness: 0.5  $\mu$ m

Data Type: Linear RI

Program Type:

Ramp

Start T: 50 C

End T: 270 C

Heat Rate: 2 K/min

Source: Pang T.; Zhu S.; Lu X.; Xu G., Identification of unknown compounds on the basis of retention index data in comprehensive two-dimensional gas chromatography, J. Sep. Sci., 30, 2007, 868-874.

2. Value: 1005.7 iu

Column Type: Capillary

Column Class: Standard non-polar

Active Phase: DB-Petro

Column Length: 50 m

Column Diameter: 0.2 mm

Phase Thickness: 0.5  $\mu$ m



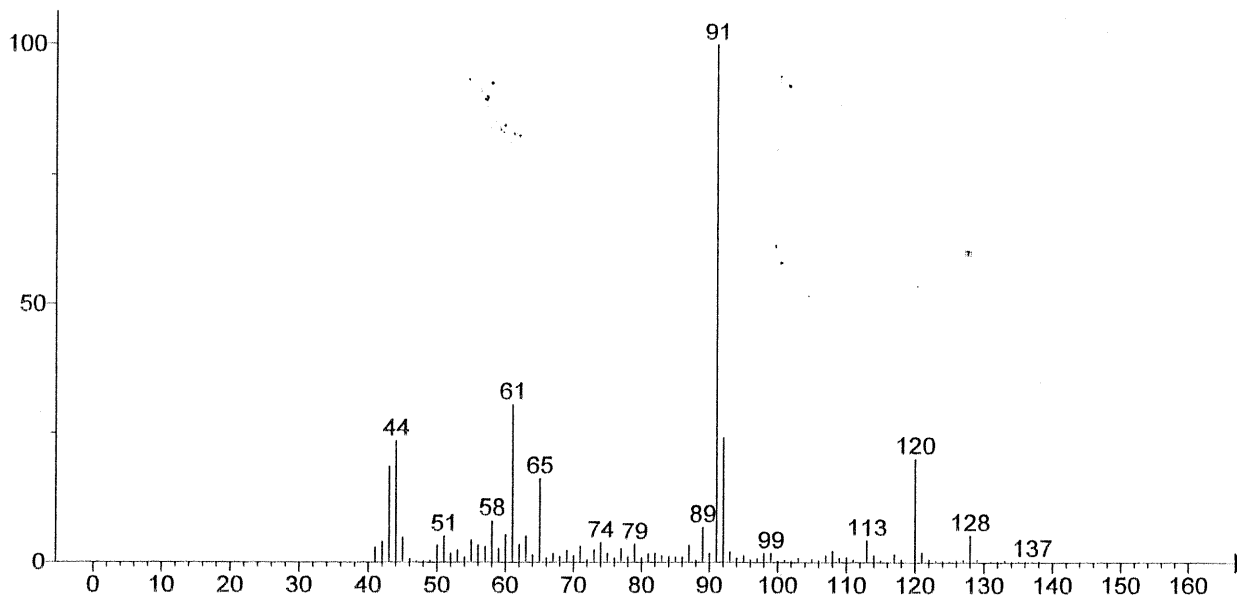

(Text File) +EI Scan (16.534 min) ALI-OLE-H7-220421-.D

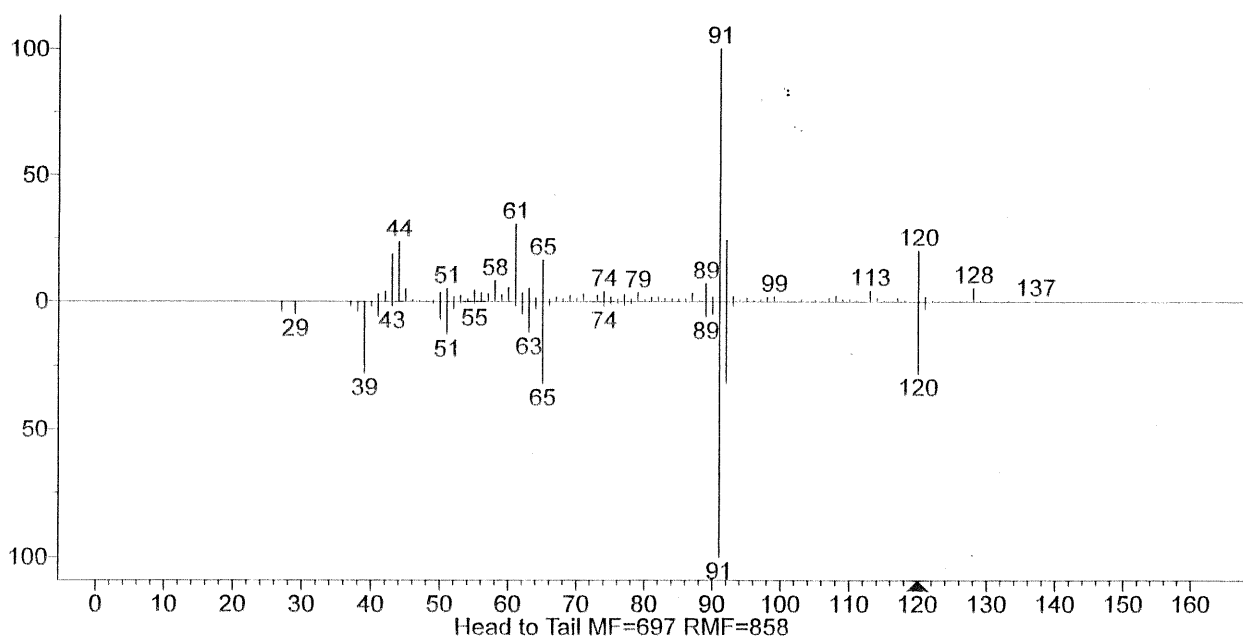

Head to Tail MF=697 RMF=858

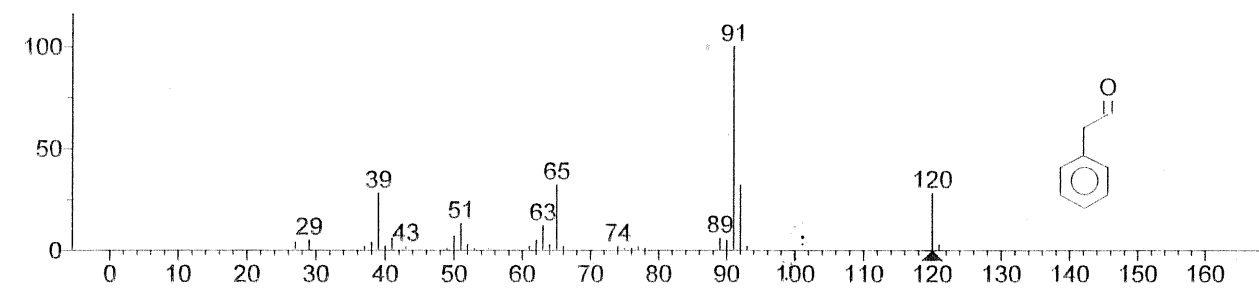

(replib) Benzeneacetaldehyde

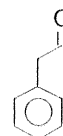

Name: Benzeneacetaldehyde

Formula: C<sub>8</sub>H<sub>8</sub>O

MW: 120 CAS#: 122-78-1 NIST#: 53623 ID#: 11325 DB: replib

Other DBs: Fine, TSCA, RTECS, HODOC, NIH, EINECS, IRDB

Contributor: FOOD RESEARCH REPORT 122, K.E. MURRAY & COLLEAGUES, DIV OF FOOD RESEARCH, CSIRO, AUSTRALIA

10 largest peaks:

91 999 | 65 320 | 92 320 | 39 280 | 120 280 | 51 130 | 63 120 | 50 70 | 41 60 | 89 60 |

Synonyms:

1. Acetaldehyde, phenyl-

2.  $\alpha$ -Tolualdehyde

3.  $\alpha$ -Toluic aldehyde

4. Hyacinthin

5. Phenylacetaldehyde

6. Phenylacetic aldehyde

7. Phenylethanal

8. 2-Phenylethanal

9. PAA

10. Phenyl acetaldehyde

Estimated non-polar retention index (n-alkane scale):

Value: 1081 iu

Confidence interval (Aldehydes): 45(50%) 196(95%) iu

Retention index.

1. Value: 1048 iu

Column Type: Capillary

Column Class: Standard non-polar

Active Phase: DB-1

Column

Length: 30 m

Carrier Gas: He

Column Diameter: 0.25 mm

Phase Thickness: 0.25  $\mu$ m

Data Type: Linear

RI

Program Type: Ramp

Start T: 60 C

End T: 240 C

Heat Rate: 4 K/min

Source: Rezazadeh, S.; Hamedani, M.

P.; Dowlatabadi, R.; Yazdani, D.; Shafiee, A., Chemical composition of the essential oils of *Stachys schtschegleevii* Sosn. and *Stachys balansae* Boiss & Kotschy from Iran, *Flavour Fragr. J.*, 21, 2006, 290-293.

2. Value: 1012

iu

Column Type: Capillary

Column Class: Standard non-polar

Active Phase: CP Sil 5 CB

Column Length: 25

m

Carrier Gas: H<sub>2</sub>

Column Diameter: 0.25 mm

Data Type: Linear RI

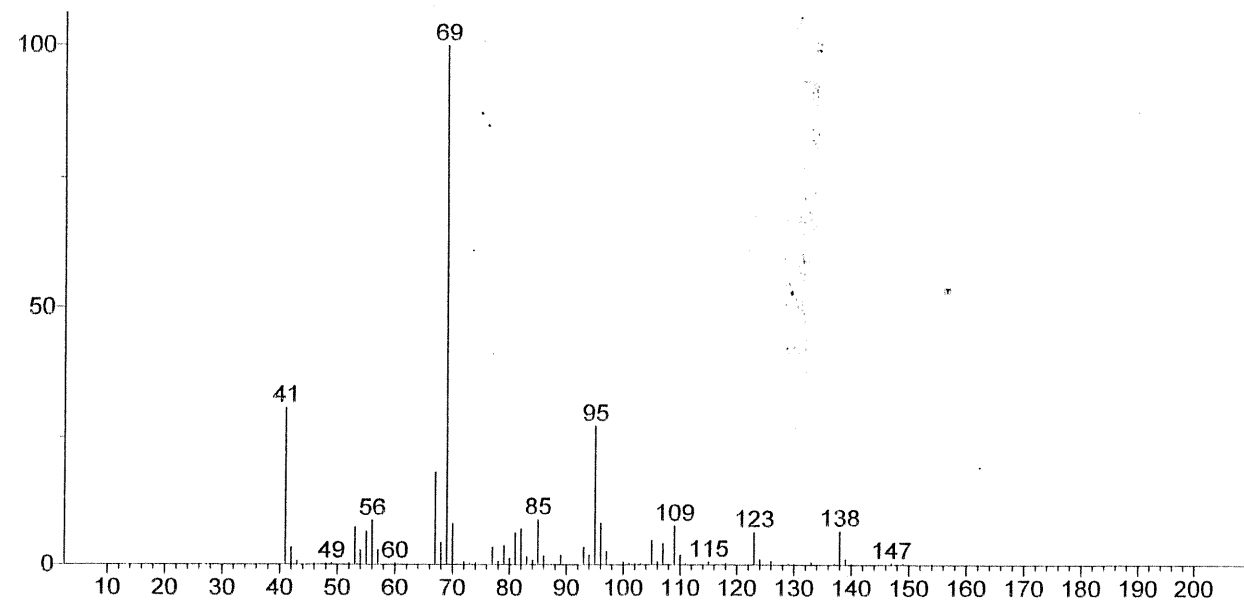

(Text File) +EI Scan (16.877 min) ALI-OLE-H7-220421-.D Subtract

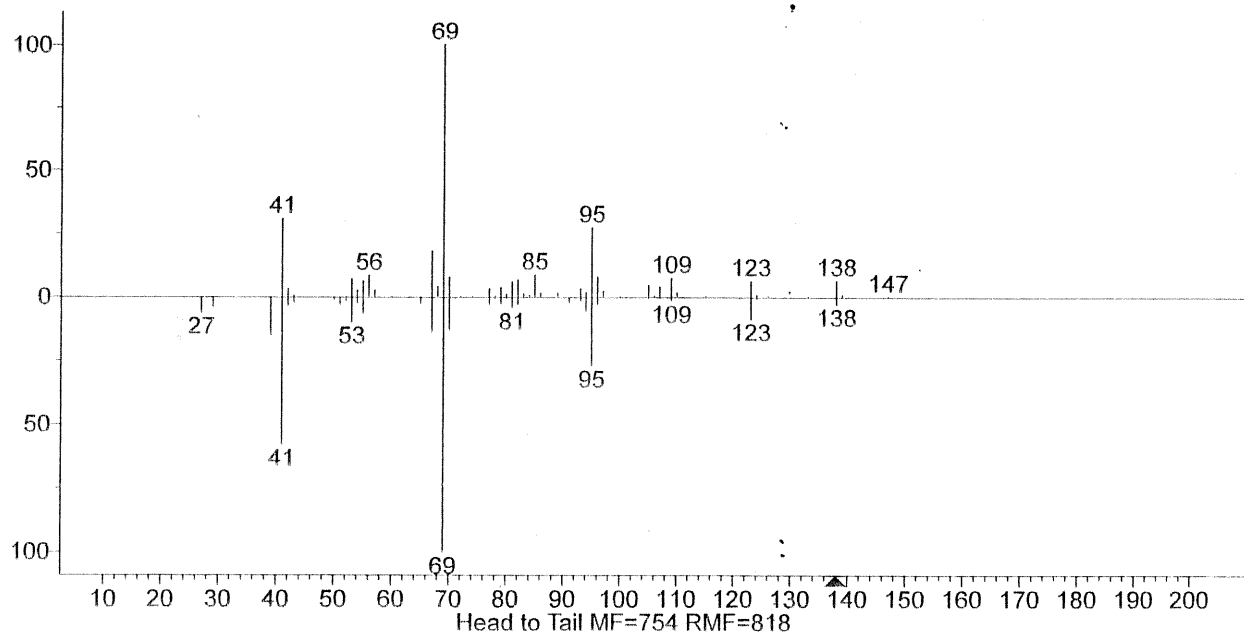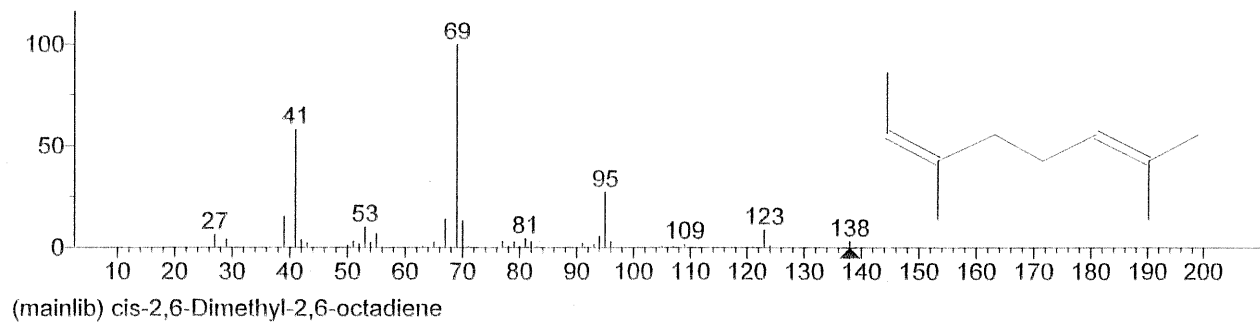

Name: cis-2,6-Dimethyl-2,6-octadiene

Formula: C<sub>10</sub>H<sub>18</sub>

MW: 138 CAS#: 2492-22-0 NIST#: 114539 ID#: 30178 DB: mainlib

Other DBs: IRDB

Contributor: NIST Mass Spectrometry Data Center, 1990.

10 largest peaks:

69 999 | 41 578 | 95 270 | 39 150 | 67 138 | 70 129 | 53 97 | 123 84 | 55 65 | 27 61 |

Synonyms:

1.(6Z)-2,6-Dimethyl-2,6-octadiene #

Estimated non-polar retention index (n-alkane scale):

Value: 985 iu

Confidence interval (Hydrocarbons): 39(50%) 167(95%) iu

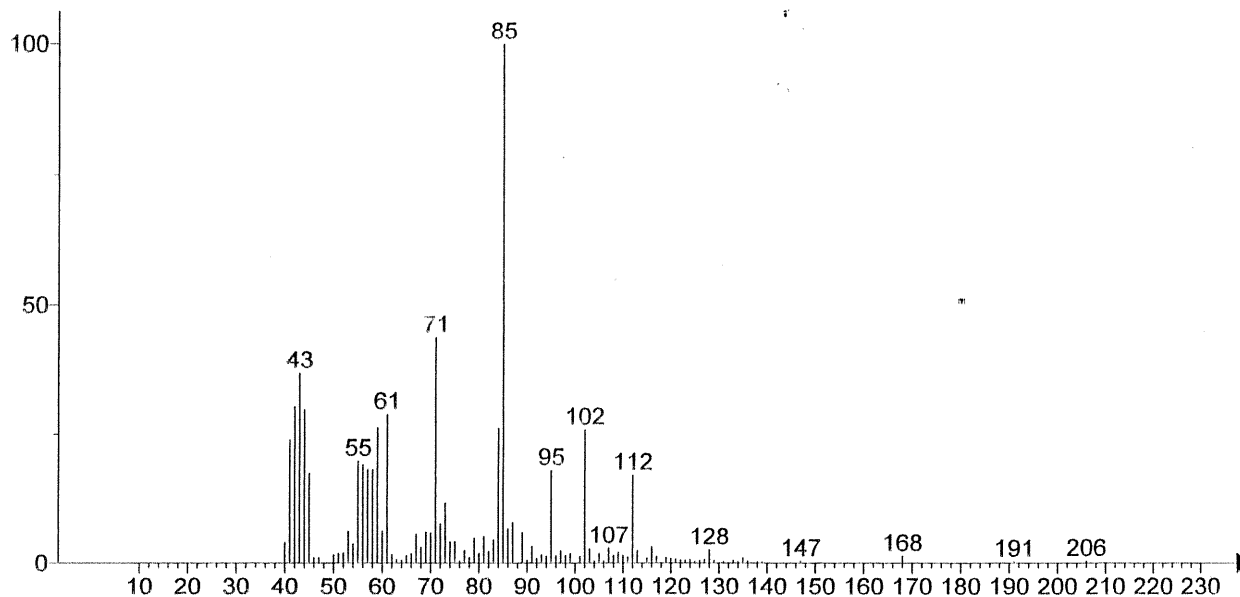

(Text File) +EI Scan (17.547 min) ALI-OLE-H7-220421-.D

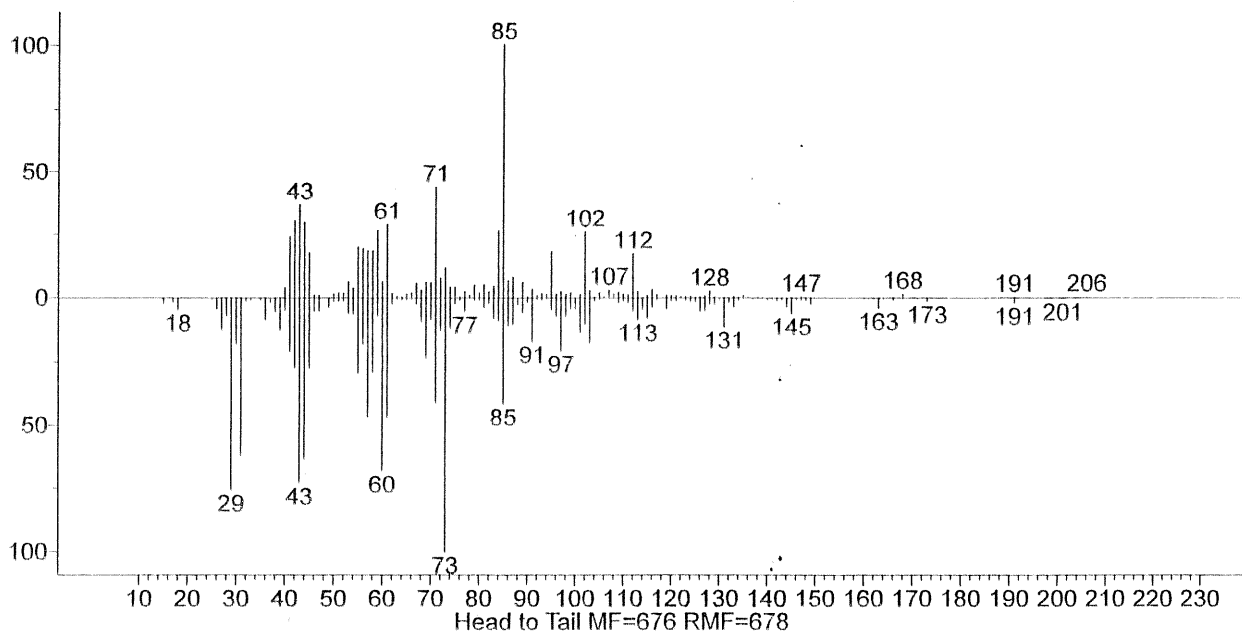

Head to Tail MF=676 RMF=678

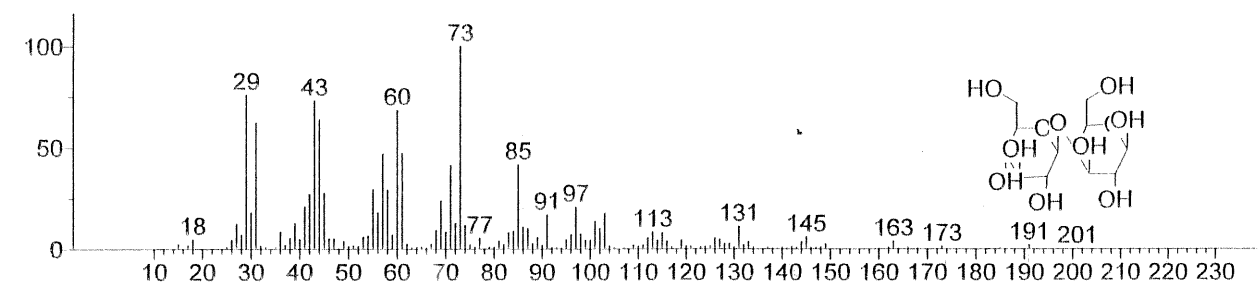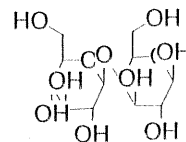

(replib) β-D-Glucopyranose, 4-O-β-D-galactopyranosyl-

Name:  $\beta$ -D-Glucopyranose, 4-O- $\beta$ -D-galactopyranosyl-

Formula:  $C_{12}H_{22}O_{11}$

MW: 342 CAS#: 5965-66-2 NIST#: 76424 ID#: 8344 DB: replib

Other DBs: TSCA, HODOC, EINECS

Contributor: RADIAN CORP

10 largest peaks:

73 999 | 29 757 | 43 729 | 60 681 | 44 636 | 31 620 | 61 470 | 57 468 | 85 416 | 71 412 |

Synonyms:

1. Lactose,  $\beta$ -

2.  $\beta$ -Lactose

3. 4-O-Hexopyranosylhexopyranose #

Estimated non-polar retention index (n-alkane scale):

Value: 3131 iu

Confidence interval (Diverse functional groups): 89(50%) 382(95%) iu

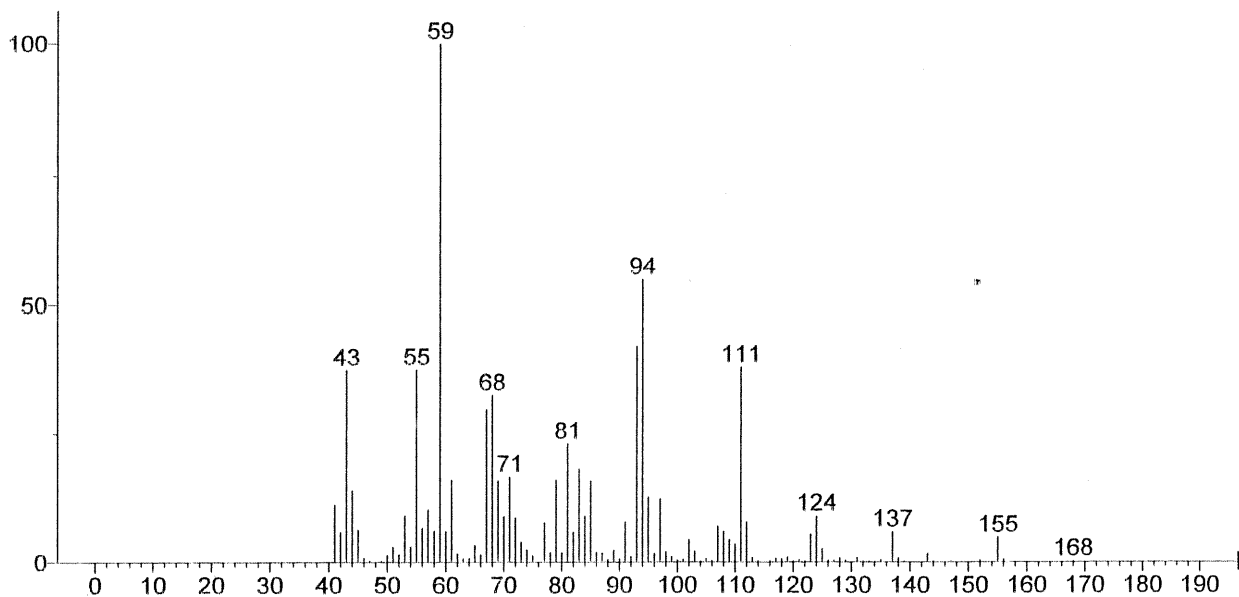

(Text File) +EI Scan (17.767 min) ALI-OLE-H7-220421-.D

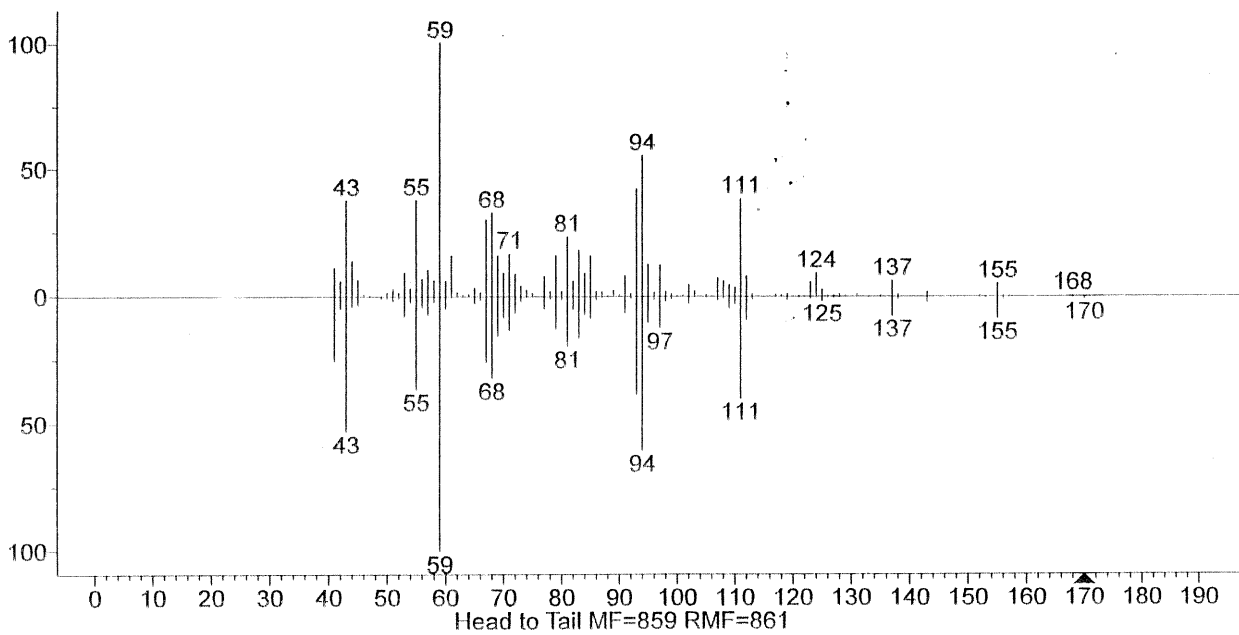

Head to Tail MF=859 RMF=861

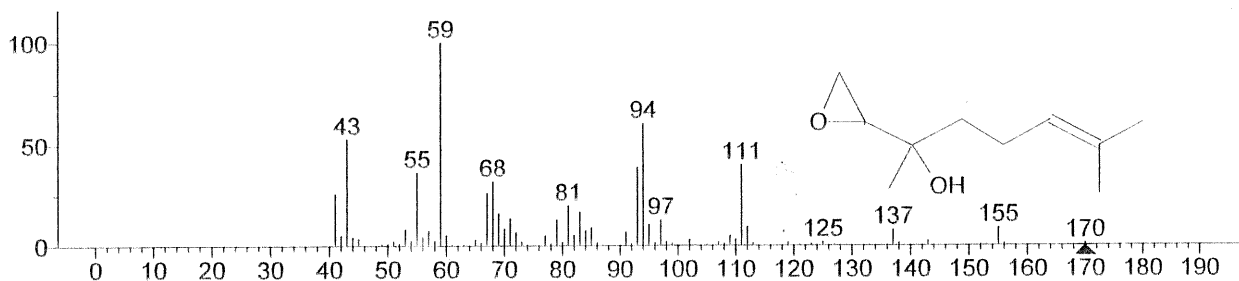

(mainlib)  $\alpha$ -Methyl- $\alpha$ -[4-methyl-3-pentenyl]oxiranemethanol

Name:  $\alpha$ -Methyl- $\alpha$ -[4-methyl-3-pentenyl]oxiranemethanol

Formula:  $C_{10}H_{18}O_2$

MW: 170 NIST#: 132130 ID#: 26674 DB: mainlib

Contributor: Insect Chem. Ecol. Lab., USDA, Beltsville, MD 20705

10 largest peaks:

59 999 | 94 603 | 43 527 | 111 398 | 93 385 | 55 362 | 68 318 | 67 258 | 41 256 | 81 196 |

Synonyms:

no synonyms.

Estimated non-polar retention index (n-alkane scale):

Value: 1182 iu

Confidence interval (Diverse functional groups): 89(50%) 382(95%) iu



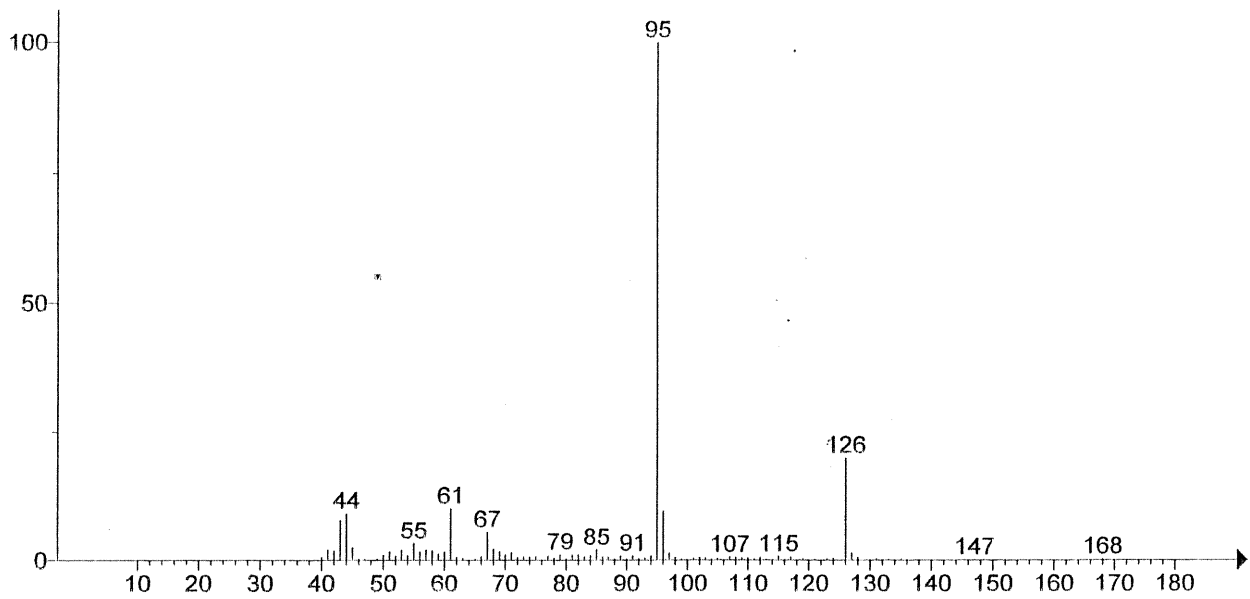

(Text File) +EI Scan (18.099 min) ALI-OLE-H7-220421-.D

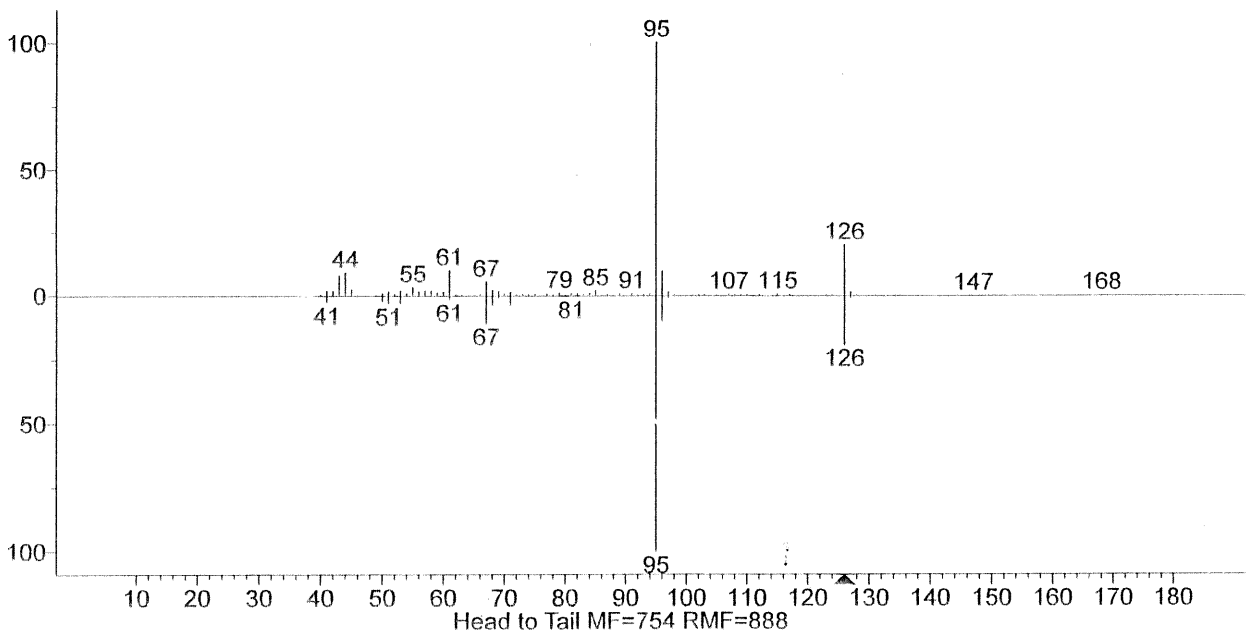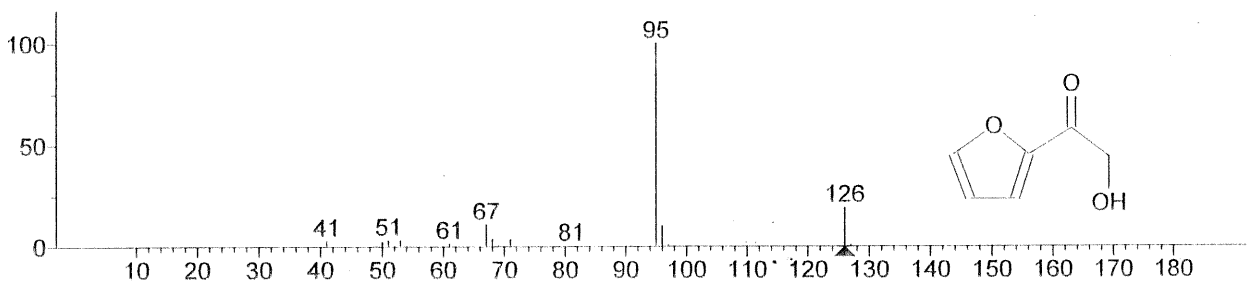

(mainlib) Furyl hydroxymethyl ketone

Name: Furyl hydroxymethyl ketone

Formula: C<sub>6</sub>H<sub>6</sub>O<sub>3</sub>

MW: 126 CAS#: 17678-19-2 NIST#: 281423 ID#: 58741 DB: mainlib

Other DBs: None

Contributor: I.Cutzach ET AL.J.Agric.Food Chem.,47,1663(1999)

10 largest peaks:

95 999 | 126 190 | 67 107 | 96 100 | 68 36 | 71 36 | 51 29 | 53 29 | 41 26 | 50 21 |

Synonyms:

1.Ethanone, 1-(2-furanyl)-2-hydroxy-

2.Ketone, 2-furyl hydroxymethyl

3.2-(Hydroxyacetyl)furan

4.2-Furyl hydroxymethyl ketone

5.2-(2'-Hydroxyacetyl)furan

6.2-(1-Oxo-2-hydroxyethyl)furan

7.1-(2-Furyl)-2-hydroxyethanone #

Estimated non-polar retention index (n-alkane scale):

Value: 1121 iu

Confidence interval (Diverse functional groups): 89(50%) 382(95%) iu

Retention index.

1. Value: 1070 iu

Column Type: Capillary

Column Class: Standard non-polar

Active Phase: DB-1

Column

Length: 60 m

Carrier Gas: He

Column Diameter: 0.32 mm

Phase Thickness: 1 um

Data Type: Normal alkane

RI

Program Type: Ramp

Start T: 40 C

End T: 260 C

Heat Rate: 2 K/min

Source: Chen, J.; Ho, C.-T.,

Comparison of volatile generation in serine/threonine/glutamine-ribose/glucose/fructose model systems, J. Agric. Food Chem., 47, 1999, 643-647.

2. Value: 1056 iu

Column Type: Capillary

Column Class: Standard non

-polar

Active Phase: DB-1

Column Length: 60 m

Carrier Gas: He

Column Diameter: 0.32 mm

Phase Thickness:

1.0 um

Data Type: Normal alkane RI

Program Type: Ramp

Start T: 40 C

End T: 280 C

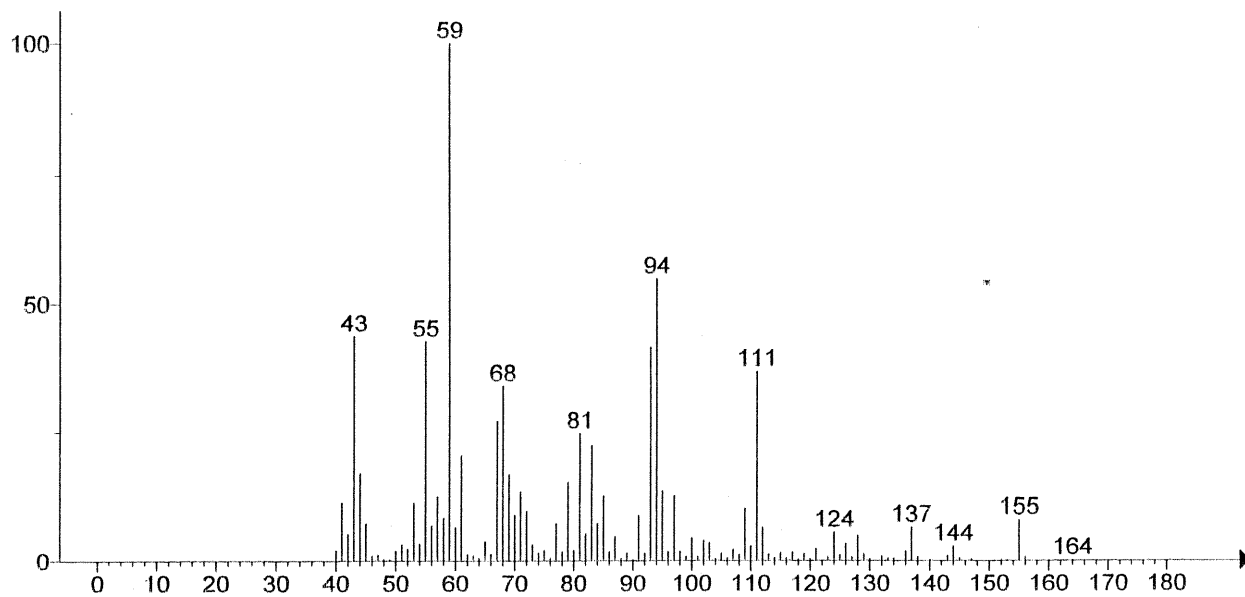

(Text File) +EI Scan (18.398 min) ALI-OLE-H7-220421-.D

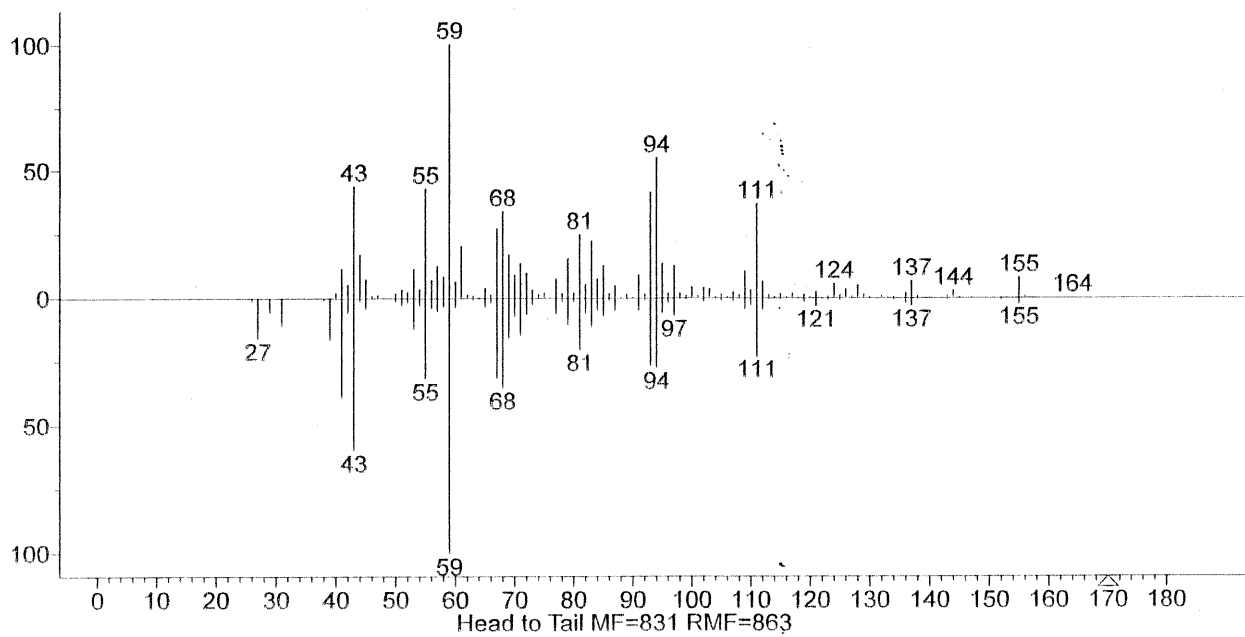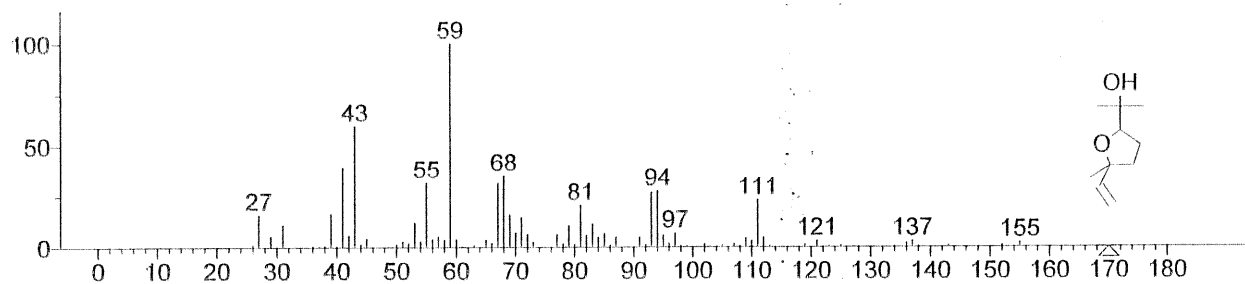

(mainlib) 2-Furanmethanol, 5-ethenyltetrahydro- $\alpha,\alpha,5$ -trimethyl-, cis-

Name: 2-Furanmethanol, 5-ethenyltetrahydro- $\alpha,\alpha,5$ -trimethyl-, cis-

Formula:  $C_{10}H_{18}O_2$

MW: 170 CAS#: 5989-33-3 NIST#: 155746 ID#: 26148 DB: mainlib

Other DBs: TSCA, EINECS

Contributor: Chemical Concepts

10 largest peaks:

59 999 | 43 595 | 41 391 | 68 351 | 55 316 | 67 314 | 94 274 | 93 266 | 111 228 | 81 204 |

Synonyms:

1. Furfuryl alcohol, tetrahydro- $\alpha,\alpha,5$ -trimethyl-5-vinyl-

2. cis-Linalool Oxide

3. cis-Linalyl Oxide

4. cis-5-Ethenyltetrahydro- $\alpha,\alpha,5$ -Trimethyl-2-furanmethanol

5. Linalool oxide

6. Linalool oxide B

7. Linalyl oxide

8. Furfuryl alcohol, tetrahydro- $\alpha,\alpha,5$ -trimethyl-5-vinyl- cis-5-Ethenyltetrahydro- $\alpha,\alpha,5$ -trimethyl-2-furanmethanol

9. Linalool oxide cis

10. Linalool oxide, (Z)-

11. 2-(5-Methyl-5-vinyltetrahydro-2-furanyl)-2-propanol #

Estimated non-polar retention index (n-alkane scale):

Value: 1164 iu

Confidence interval (Diverse functional groups): 89(50%) 382(95%) iu

Retention index.

1. Value: 1064 iu

Column Type: Capillary

Column Class: Standard non-polar

Active Phase: CP-Sil PONA

GB

Column Length: 100 m

Carrier Gas: He

Column Diameter: 0.25 mm

Phase Thickness: 0.25  $\mu$ m

Data Type:

Linear RI

Program Type: Ramp

Start T: 140 C

End T: 230 C

Heat Rate: 5 K/min

Start Time: 10 min

End Time:

25 min

Source: Cunicao, M.M.; Lopes, A.R.; Côcco, L.C.; Yamamoto, C.I.; Plocharski, R.C.B.; Miguel, M.D.; Junior, A.G.; Auer, C.G.; Miguel, O.G., Phytochemical and antibacterial evaluation of essential oils from Ottonia Martiana Miq. (Piperaceae), J. Braz. Chem. Soc., 18(1), 2007, 184-188.

2. Value: 1089 iu

Column Type:

Capillary

Column Class: Standard non-polar

Active Phase: SPB-1

Column Length: 30 m

Carrier Gas:

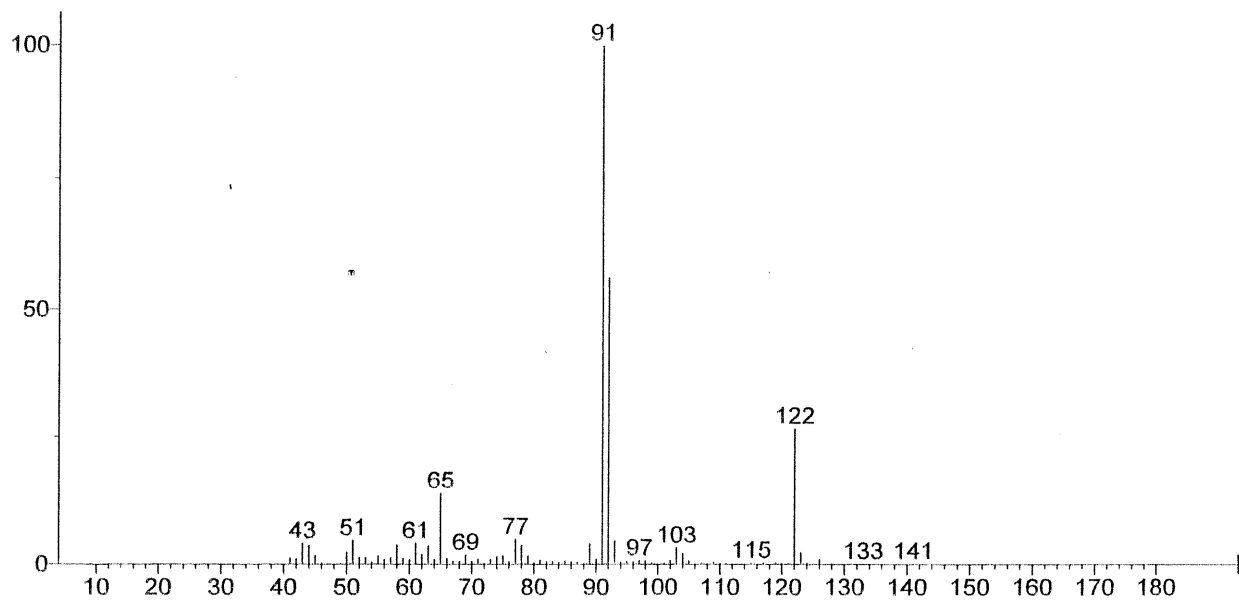

(Text File) +EI Scan (19.382 min) ALI-OLE-H7-220421-.D

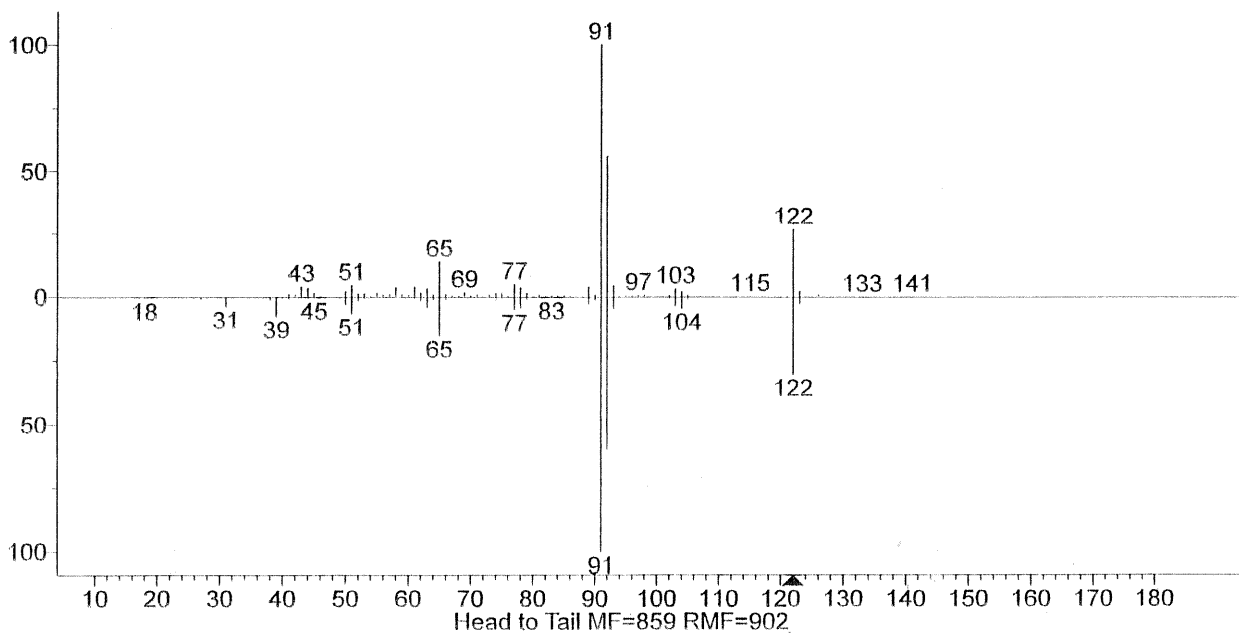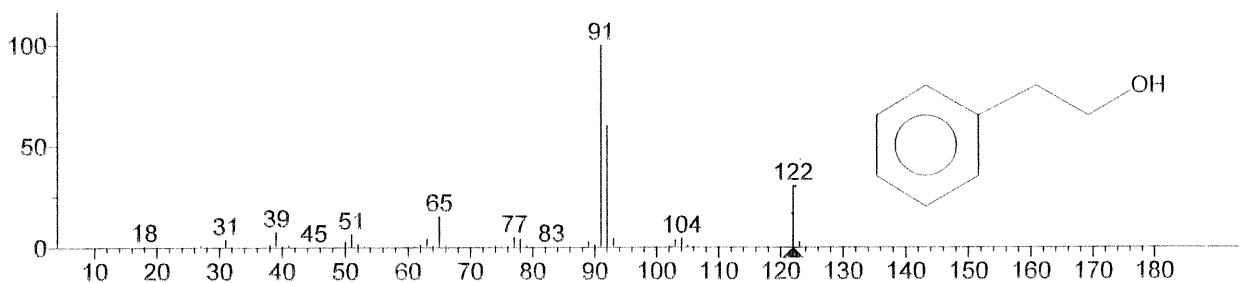

(replib) Phenylethyl Alcohol

Name: Phenylethyl Alcohol

Formula: C<sub>8</sub>H<sub>10</sub>O

MW: 122 CAS#: 60-12-8 NIST#: 229405 ID#: 11425 DB: replib

Other DBs: Fine, TSCA, RTECS, EPA, USP, HODOC, NIH, EINECS, IRDB

Contributor: Japan AIST/NIMC Database- Spectrum MS-NW- 710

10 largest peaks:

91 999 | 92 597 | 122 301 | 65 151 | 39 75 | 51 64 | 77 48 | 93 44 | 104 44 | 63 42 |

Synonyms:

1. Benzeneethanol
2. Phenethyl alcohol
3.  $\beta$ -Hydroxyethylbenzene
4.  $\beta$ -Phenethyl alcohol
5.  $\beta$ -Phenylethanol
6.  $\beta$ -Phenylethyl alcohol
7.  $\beta$ -PEA
8. Benzyl Carbinol
9. Ethanol, 2-phenyl-
10. Phenethanol
11. PEA
12. 2-Phenethyl Alcohol
13. 2-Phenylethanol
14. 2-Phenylethyl alcohol
15. Methanol, benzyl-
16. Phenylethanol
17. Phenylethyl, b- alcohol
18. 2-PEA
19.  $\beta$ -Fenethylalkohol
20.  $\beta$ -Fenylethanol
21. Orange oil
22. Rose oil
23.  $\beta$ -Phenethanol
24. 2-Phenethanol
25.  $\beta$ -P.E.A.
26. 1-Phenyl-2-ethanol
27. Hydroxyethylbenzene
28. Mellol
29. Beta-phenylethyl alcohol

Estimated non-polar retention index (n-alkane scale):

Value: 1136 iu

Confidence interval (Alcohols): 41(50%) 176(95%) iu

Retention index.

1. Value: 1082.4 iu

Column Type: Capillary

Column Class: Standard non-polar

Active Phase: DB-Petro

Column

Length: 50 m

Column Diameter: 0.2 mm

Phase Thickness: 0.5  $\mu$ m

Data Type: Linear RI

Program Type:

Ramp

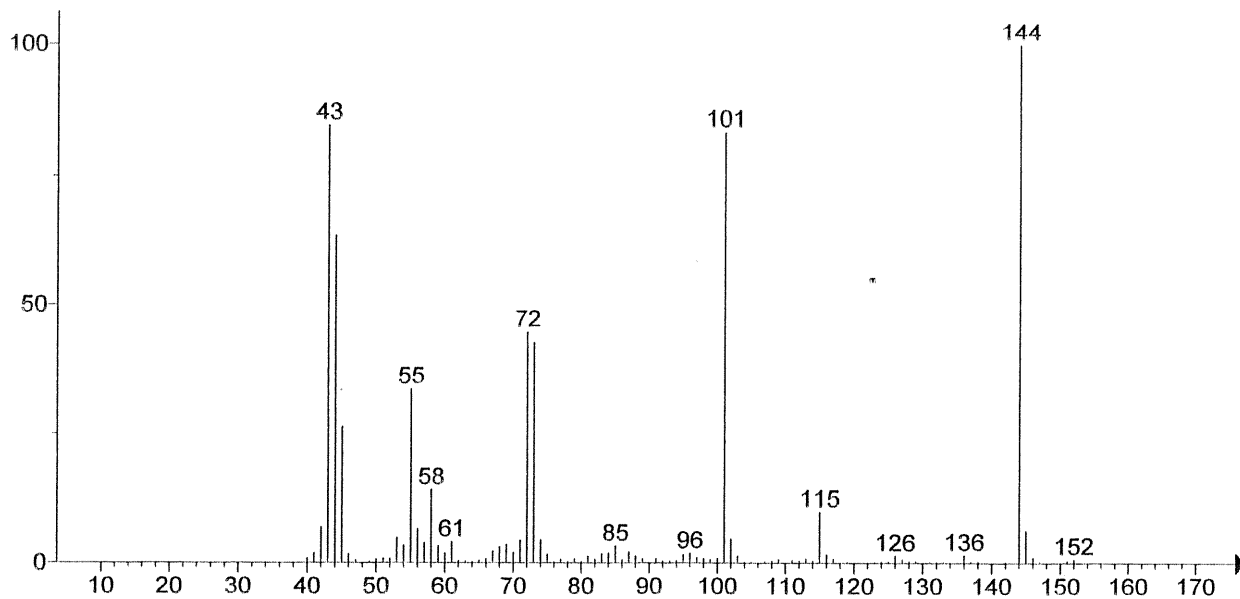

(Text File) +EI Scan (20.572 min) ALI-OLE-H7-220421-D

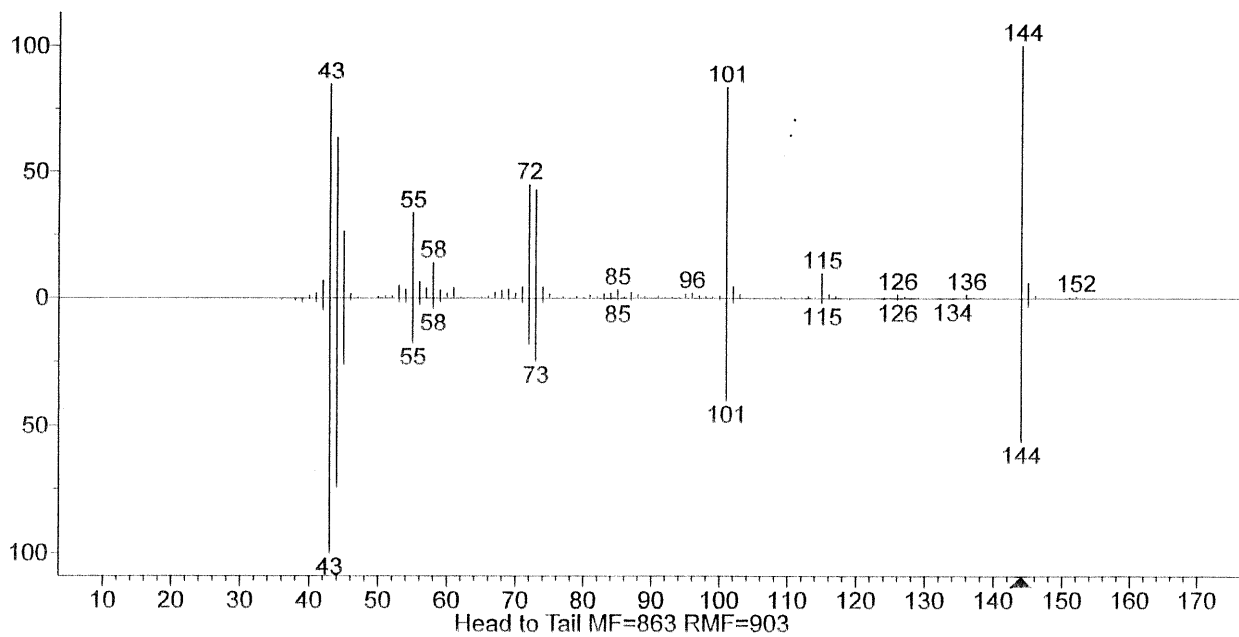

Head to Tail MF=863 RMF=903

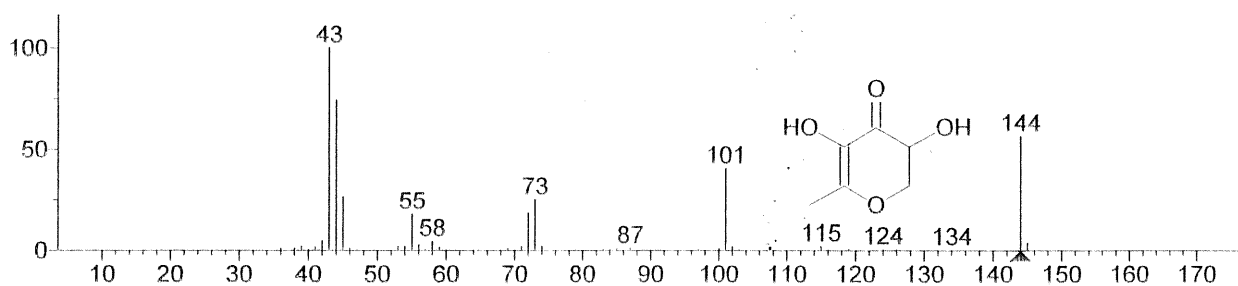

(replib) 4H-Pyran-4-one, 2,3-dihydro-3,5-dihydroxy-6-methyl-

Name: 4H-Pyran-4-one, 2,3-dihydro-3,5-dihydroxy-6-methyl-

Formula: C<sub>6</sub>H<sub>8</sub>O<sub>4</sub>

MW: 144 CAS#: 28564-83-2 NIST#: 108691 ID#: 1857 DB: replib

Other DBs: RTECS

Contributor: Philip Morris R&D

10 largest peaks:

43 999 | 44 742 | 144 563 | 101 402 | 45 264 | 73 249 | 72 182 | 55 177 | 42 48 | 58 43 |

Synonyms:

1,3,5-Dihydroxy-6-methyl-2,3-dihydro-4H-pyran-4-one #

Estimated non-polar retention index (n-alkane scale):

Value: 1269 iu

Confidence interval (Diverse functional groups): 89(50%) 382(95%) iu

Retention index.

1. Value: 1119 iu

Column Type: Capillary

Column Class: Standard non-polar

Active Phase: DB-1

Column

Length: 60 m

Carrier Gas: He

Column Diameter: 0.25 mm

Phase Thickness: 0.25 um

Data Type: Linear

RI

Program Type: Complex

Description: -20C (5min) => 10C/min => 100C => 4C/min => 200C => 10C/min =>

280C

Source: Eri, S.; Khoo, B.K.; Lech, J.; Hartman, T.G., Direct thermal desorption-gas chromatography and gas chromatography-mass spectrometry profiling of hop (*Humulus lupulus* L.) essential oils in support of varietal characterization, J. Agric. Food Chem., 48, 2000, 1140-1149.

2. Value: 1107 iu

Column Type: Capillary

Column

Class: Standard non-polar

Active Phase: DB-1

Column Length: 60 m

Carrier Gas: N<sub>2</sub>

Column Diameter: 0.25  
mm

Phase Thickness: 1 um

Data Type: Linear RI

Program Type: Ramp

Start T: 30 C

End T: 200 C

Heat

Rate: 5 K/min

End Time: 30 min

Source: Wu, C.-M.; Wang, Z.; Wu, Q.H., Volatile compounds produced from monosodium glutamate in common food cooking, J. Agric. Food Chem., 48, 2000, 2438-2442.

<...>



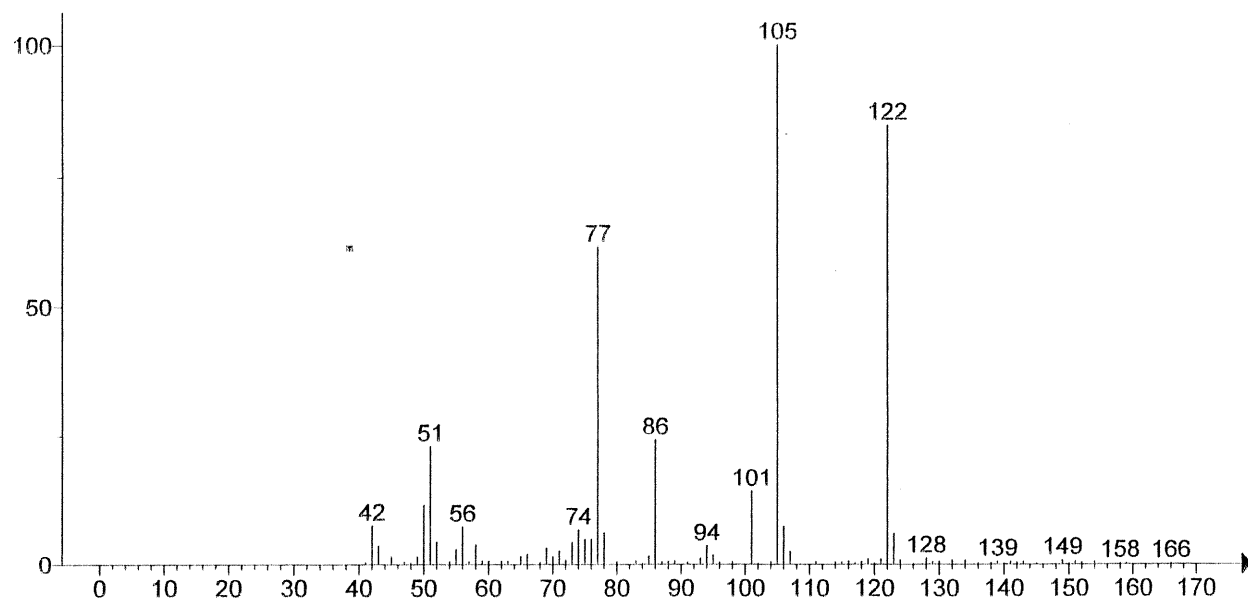

(Text File) +EI Scan (21.467 min) ALI-OLE-H7-220421-D Subtract

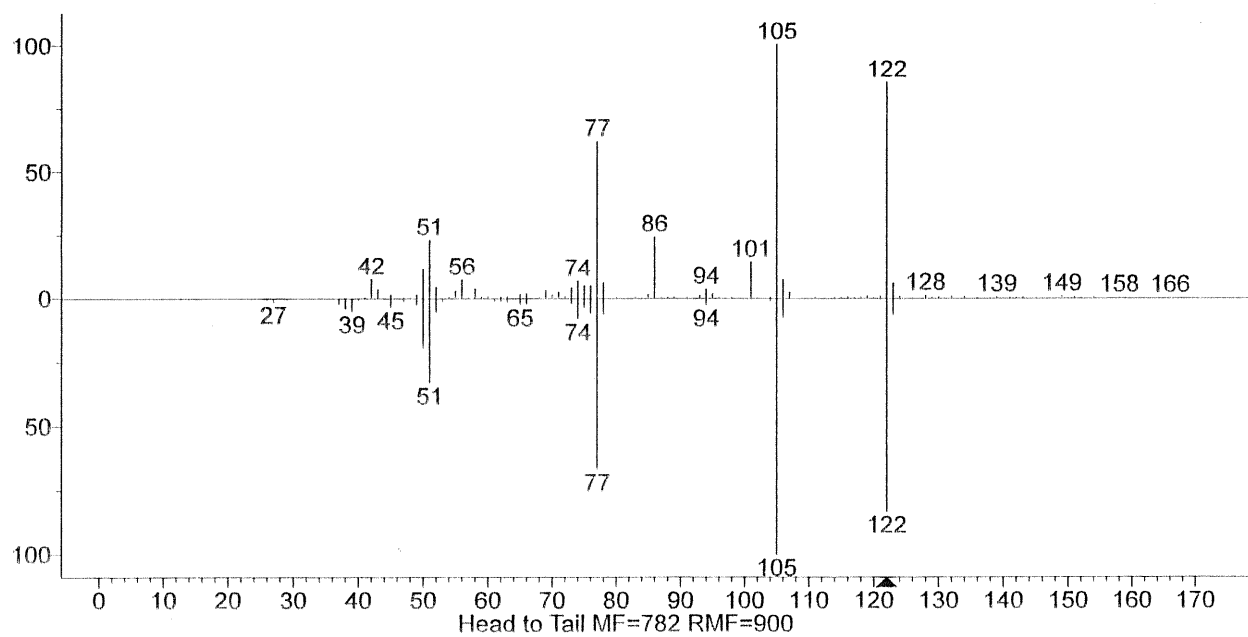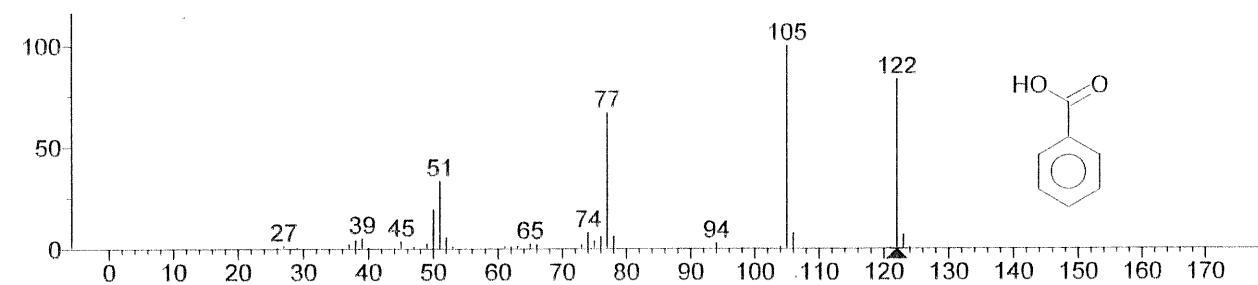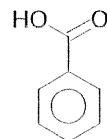

Name: Benzoic acid

Formula: C<sub>7</sub>H<sub>6</sub>O<sub>2</sub>

MW: 122 CAS#: 65-85-0 NIST#: 290514 ID#: 68652 DB: mainlib

Other DBs: Fine, TSCA, RTECS, EPA, USP, HODOC, NIH, EINECS, IRDB

Contributor: NIST Mass Spectrometry Data Center, 1998.

10 largest peaks:

105 999 | 122 831 | 77 665 | 51 330 | 50 193 | 74 79 | 106 76 | 123 67 | 78 61 | 76 59 |

Synonyms:

1. Benzenecarboxylic acid
2. Benzeneformic acid
3. Benzenemethanoic acid
4. Benzoesaure GK
5. Benzoesaure GV
6. Carboxybenzene
7. Dracrylic acid
8. Phenylcarboxylic acid
9. Phenylformic acid
10. Retarder BA
11. Retardex
12. Salvo, liquid
13. Solvo, powder
14. Tenn-Plas
15. Acide benzoique
16. Benzoic acid, tech.
17. Kyselina benzoova
18. Salvo
19. Benzoesaure
20. Salvo powder
21. E 210
22. Ha 1
23. Ha 1 (acid)
24. Salvo liquid
25. Solvo powder
26. Phenylcarboxy
27. Benzenemethonic acid
28. Diacrylic acid
29. Flowers of benjamin
30. Flowers of benzoin
31. Nipacide
32. Oracrylic acid
33. Predominantly benzoic acid
34. Retarded BA
35. Retarder BA, BAX

Estimated non-polar retention index (n-alkane scale):

Value: 1150 iu

Confidence interval (Carboxylic acids): 51(50%) 220(95%) iu

Retention index.

1. Value: 1160 iu

Column Type: Capillary

Column Class: Standard non-polar

Active Phase: DB-1

Column

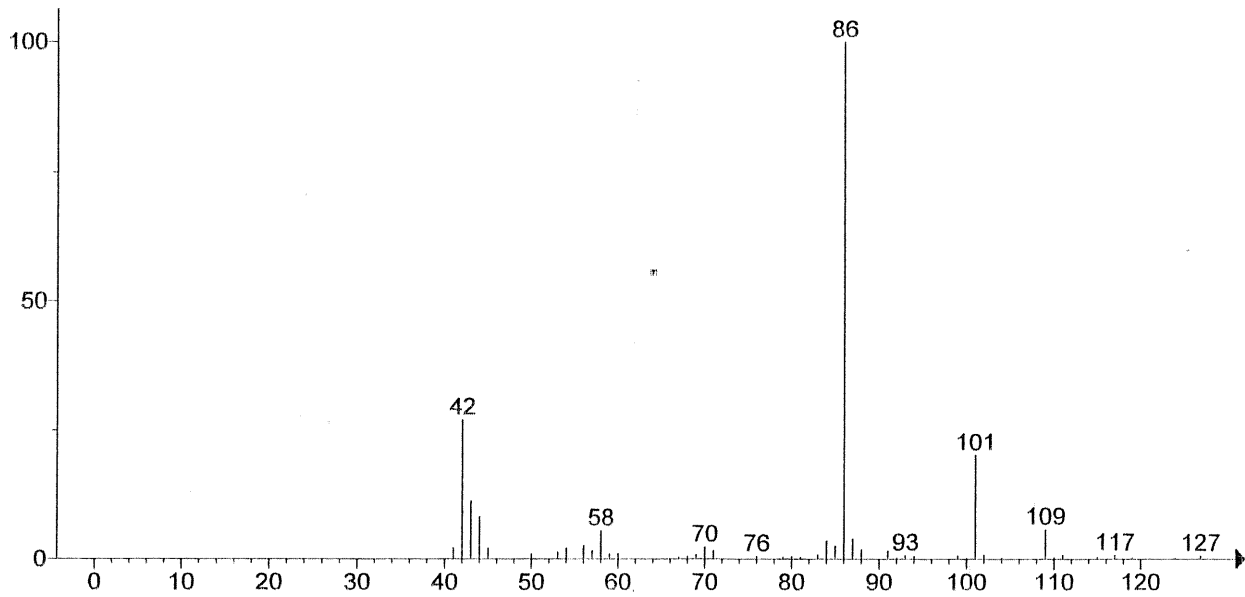

(Text File) +EI Scan (21.702 min) ALI-OLE-H7-220421-.D Subtract

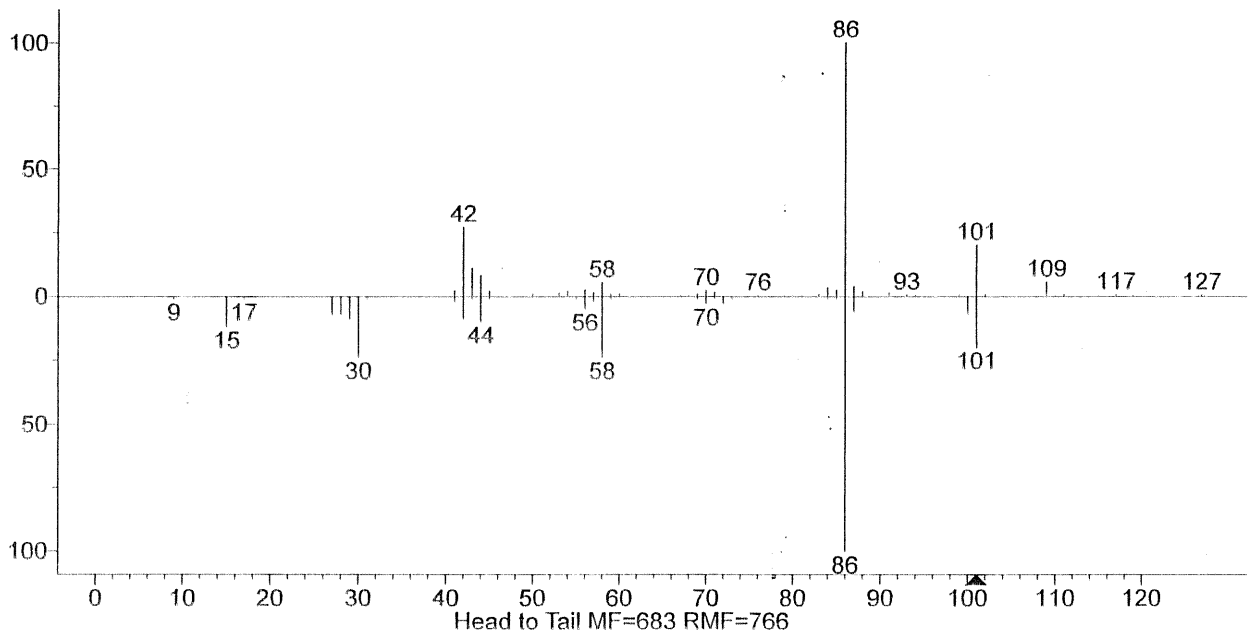

Head to Tail MF=683 RMF=766

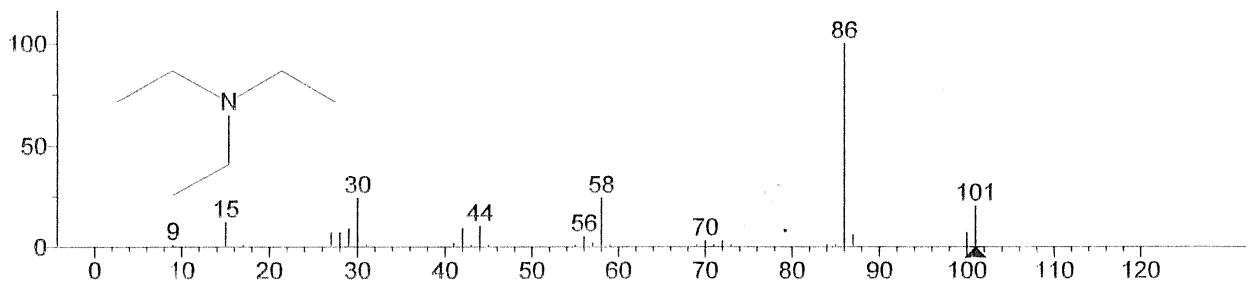

(replib) Triethylamine

Name: Triethylamine

Formula:  $C_6H_{15}N$

MW: 101 CAS#: 121-44-8 NIST#: 51537 ID#: 10741 DB: replib

Other DBs: Fine, TSCA, RTECS, EPA, HODOC, EINECS, IRDB

Contributor: CARL DJERASSI DEPT OF CHEM STANFORD UNIV STANFORD CALIF 94305

10 largest peaks:

86 999 | 30 240 | 58 240 | 101 200 | 15 120 | 44 100 | 29 90 | 42 90 | 27 70 | 28 70 |

Synonyms:

1. Ethanamine, N,N-diethyl-

2.  $(C_2H_5)_3N$

3. (Diethylamino)ethane

4. N,N-Diethylethanamine

5. TEN

6. Triaethylamin

7. Trietilamina

8. UN 1296

9. N,N,N-Triethylamine #

Estimated non-polar retention index (n-alkane scale):

Value: 667 iu

Confidence interval (Nitrogen-containing): 83(50%) 356(95%) iu

Retention index.

1. Value: 682 iu

Column Type: Capillary

Column Class: Standard non-polar

Active Phase: DB-1

Column Length:

30 m

Carrier Gas: He

Column Diameter: 0.32 mm

Phase Thickness: 5  $\mu m$

Data Type: Linear RI

Program Type:

Ramp

Start T: 35 C

End T: 270 C

Heat Rate: 10 K/min

Start Time: 1 min

Source: Bartelt, R.J., Calibration of a

commercial solid-phase microextraction device for measuring headspace concentrations of organic volatiles, Anal. Chem., 69, 1997, 364-372.

2. Value: 724 iu

Column Type: Packed

Column Class: Standard non-polar

Active

Phase: PMS-100

Column Length: 3 m

Carrier Gas: He

Substrate: Celite 545 (44-60 mesh)

Data Type: Kovats

RI

Program Type: Isothermal

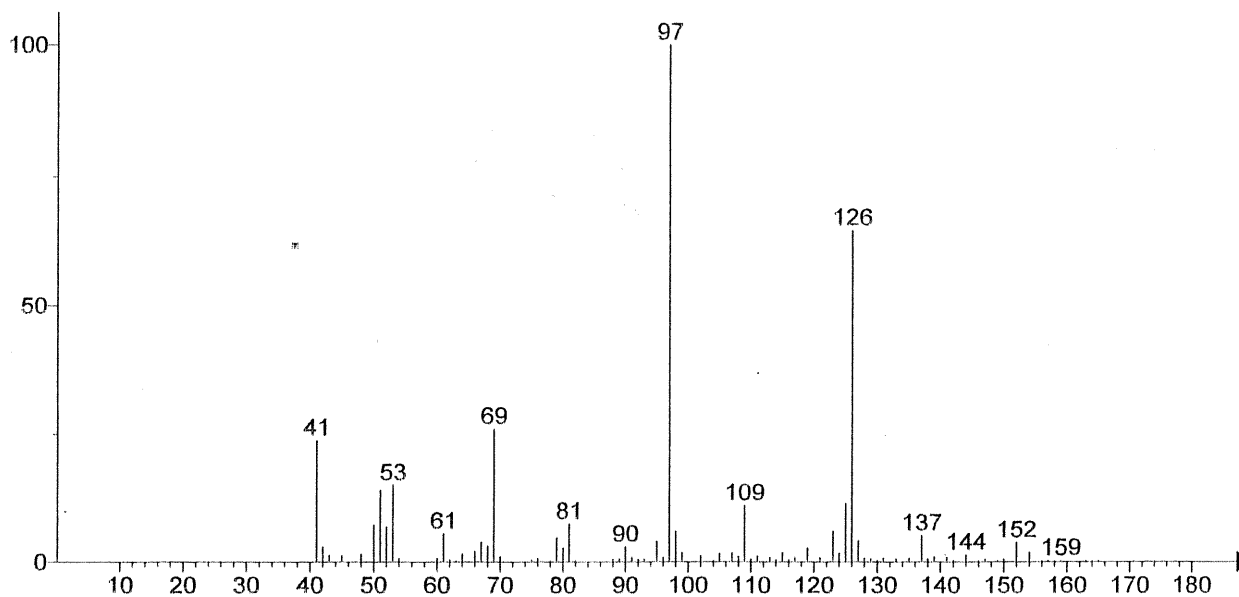

(Text File) +EI Scan (23.623 min) ALI-OLE-H7-220421-.D Subtract

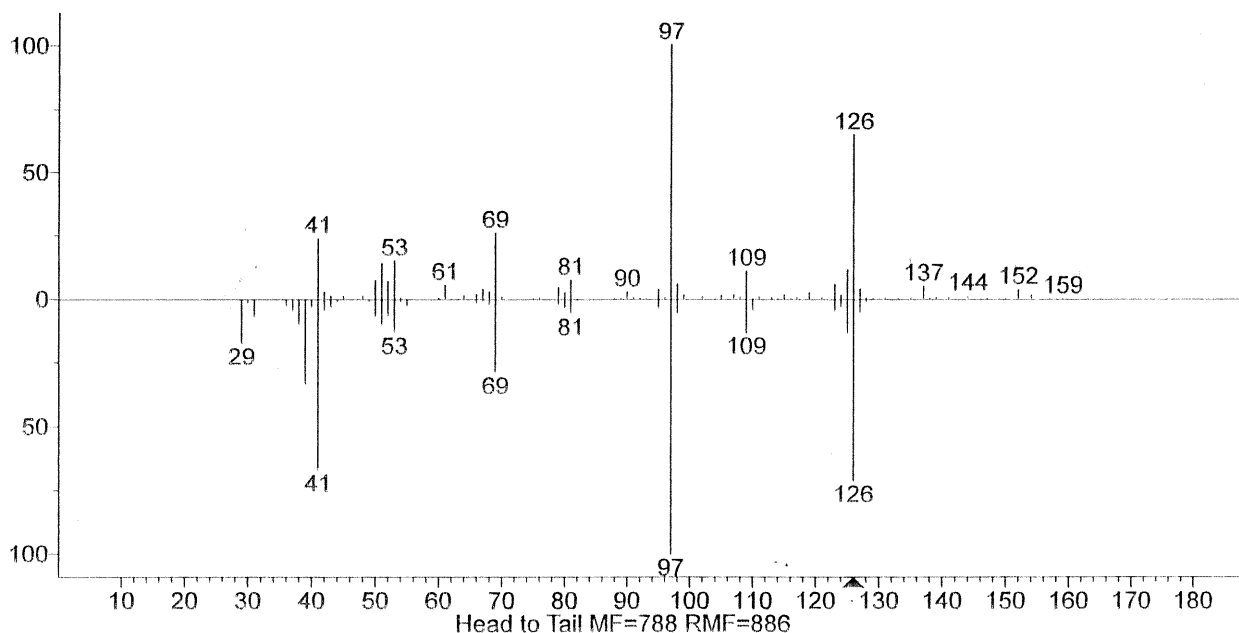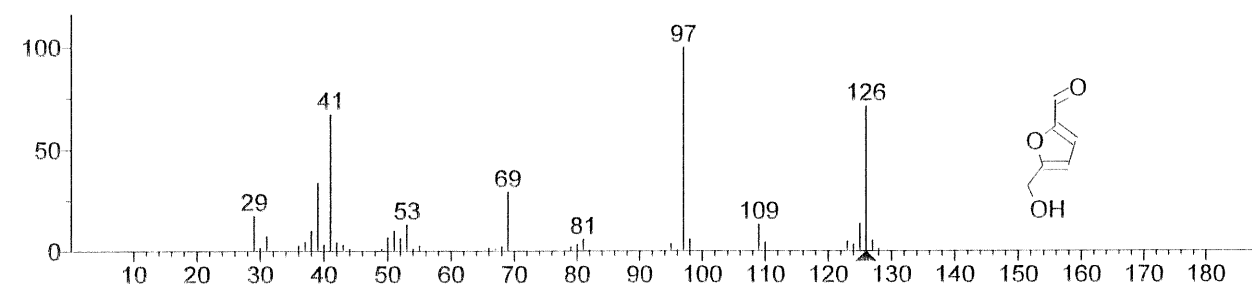

(replib) 2-Furancarboxaldehyde, 5-(hydroxymethyl)-

Name: 2-Furancarboxaldehyde, 5-(hydroxymethyl)-

Formula: C<sub>6</sub>H<sub>6</sub>O<sub>3</sub>

MW: 126 CAS#: 67-47-0 NIST#: 60544 ID#: 12795 DB: replib

Other DBs: Fine, TSCA, RTECS, HODOC, NIH, EINECS

Contributor: D.HENNEBERG, MAX-PLANCK INSTITUTE, MULHEIM, WEST GERMANY

10 largest peaks:

97 999 | 126 710 | 41 668 | 39 336 | 69 289 | 29 173 | 125 136 | 53 131 | 109 131 | 38 100 |

Synonyms:

1.2-Furaldehyde, 5-(hydroxymethyl)-

2.5-Hydrxoymethylfurfural

3.Hydroxymethylfurfurole

4.HMF

5.5-(Hydroxymethyl)Furfurole

6.5-(Hydroxymethyl)-2-formylfuran

7.5-(Hydroxymethyl)-2-furaldehyde

8.5-(Hydroxymethyl)-2-furancarbondal

9.5-(Hydroxymethyl)-2-furfural

10.5-(Hydroxymethyl)-2-furfuraldehyde

11.5-(Hydroxymethyl)furan-2-aldehyde

12.5-(Hydroxymethyl)furfural

13.5-Hydroxymethylfuraldehyde

14.5-Oxymethylfurfurole

15.5-Hydroxymethylfurfuraldehyde

16.5-Hydroxymethyl-2-furancarbaldehyde

17.Hydroxymethylfurfuraldehyde

18.5-(Hydroxymethyl)-2-furancarboxaldehyde

19.2-Hydroxymethyl-5-furfural

Estimated non-polar retention index (n-alkane scale):

Value: 1163 iu

Confidence interval (Diverse functional groups): 89(50%) 382(95%) iu

Retention index.

1. Value: 1176 iu

Column Type: Capillary

Column Class: Standard non-polar

Active Phase: DB-1

Column

Length: 60 m

Carrier Gas: N<sub>2</sub>

Column Diameter: 0.25 mm

Phase Thickness: 1 µm

Data Type: Linear

RI

Program Type: Ramp

Start T: 30 C

End T: 200 C

Heat Rate: 5 K/min

End Time: 30 min

Source: Wu, C.-M.;

Wang, Z.; Wu, Q.H., Volatile compounds produced from monosodium glutamate in common food cooking, J. Agric. Food Chem., 48, 2000, 2438-2442.

2. Value: 1208 iu

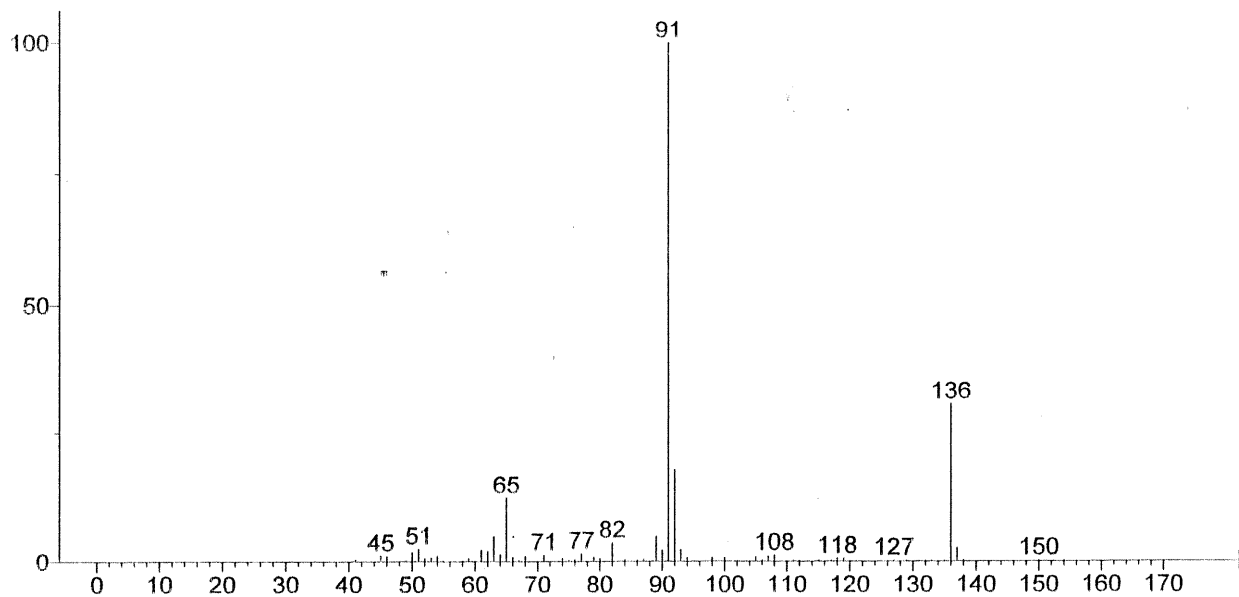

(Text File) +EI Scan (24.424 min) ALI-OLE-H7-220421-.D Subtract

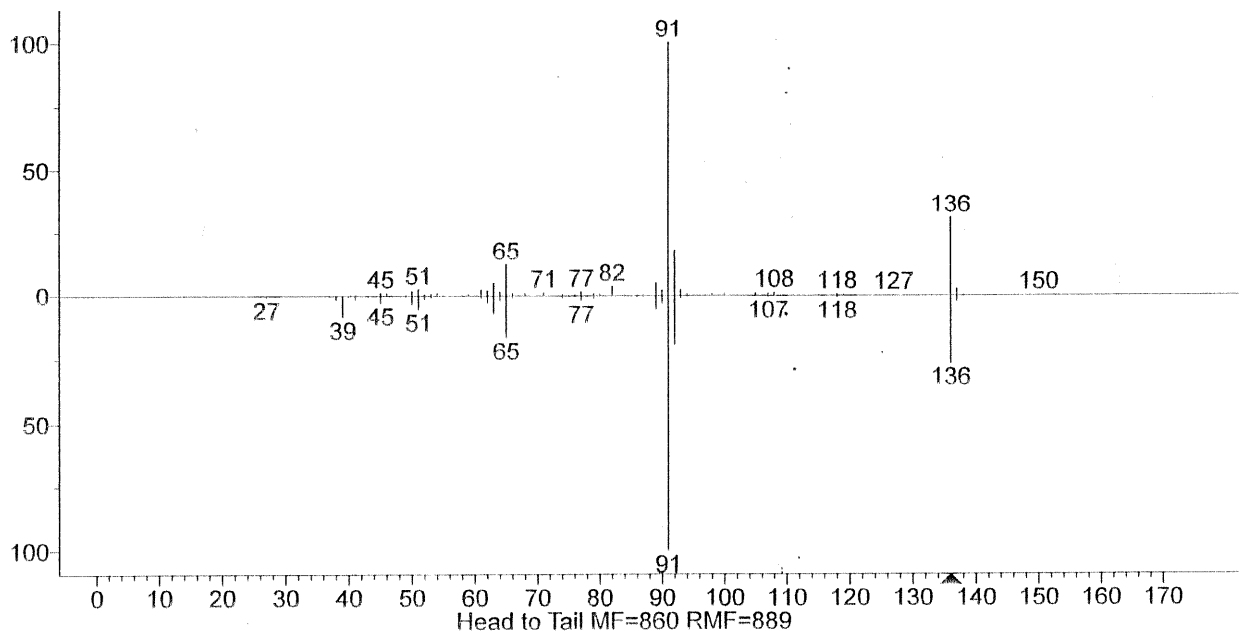

Head to Tail MF=860 RMF=889

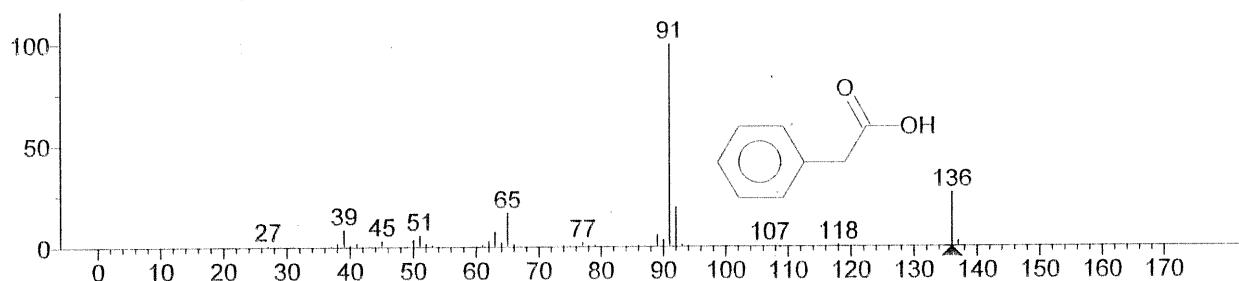

(mainlib) Benzeneacetic acid

Name: Benzeneacetic acid

Formula: C<sub>8</sub>H<sub>8</sub>O<sub>2</sub>

MW: 136 CAS#: 103-82-2 NIST#: 352514 ID#: 53145 DB: mainlib

Other DBs: Fine, TSCA, RTECS, EPA, HODOC, NIH, EINECS, IRDB

Contributor: NIST Mass Spectrometry Data Center

10 largest peaks:

91 999 | 136 264 | 92 191 | 65 163 | 39 83 | 63 72 | 89 56 | 51 55 | 50 34 | 90 33 |

Synonyms:

1. Acetic acid, phenyl-

2.  $\alpha$ -Toluic acid

3. Benzenacetic acid

4. Phenylacetic acid

5.  $\omega$ -Phenylacetic acid

6. Phenylethanoic acid

7. Kyselina fenylactova

8. 2-Phenylacetic acid

Estimated non-polar retention index (n-alkane scale):

Value: 1249 iu

Confidence interval (Carboxylic acids): 51(50%) 220(95%) iu

Retention index.

1. Value: 1251 iu

Column Type: Capillary

Column Class: Standard non-polar

Active Phase: DB-1

Column

Length: 25 m

Column Diameter: 0.2 mm

Phase Thickness: 0.33  $\mu$ m

Data Type: Linear RI

Program Type:

Ramp

Start T: 50 C

End T: 300 C

Heat Rate: 4 K/min

Source: Osorio, C.; Alarcon, M.; Moreno, C.; Bonilla, A.;

Barrios, J.; Garzon, C.; Duque, C., Characterization of Odor-Active Volatiles in Champa ( *Campomanesia lineatifolia* R. & P.), J. Agric. Food Chem., 54, 2006, 509-516.

2. Value: 1240 iu

Column Type: Packed

Column Class:

Standard non-polar

Active Phase: SE-30

Column Length: 3.05 m

Carrier Gas: He

Substrate: Supelcoport and  
Chromosorb

Data Type: Linear RI

Program Type: Ramp

Start T: 40 C

End T: 250 C

Heat Rate: 10 K/min



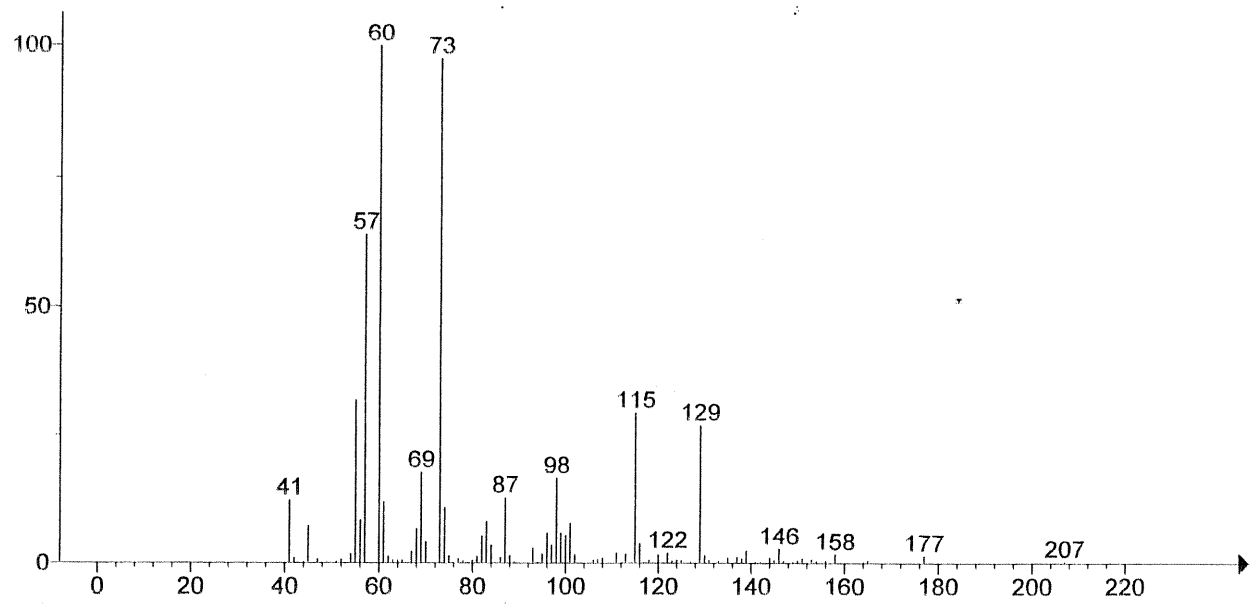

(Text File) +EI Scan (25.027 min) ALI-OLE-H7-220421-.D Subtract

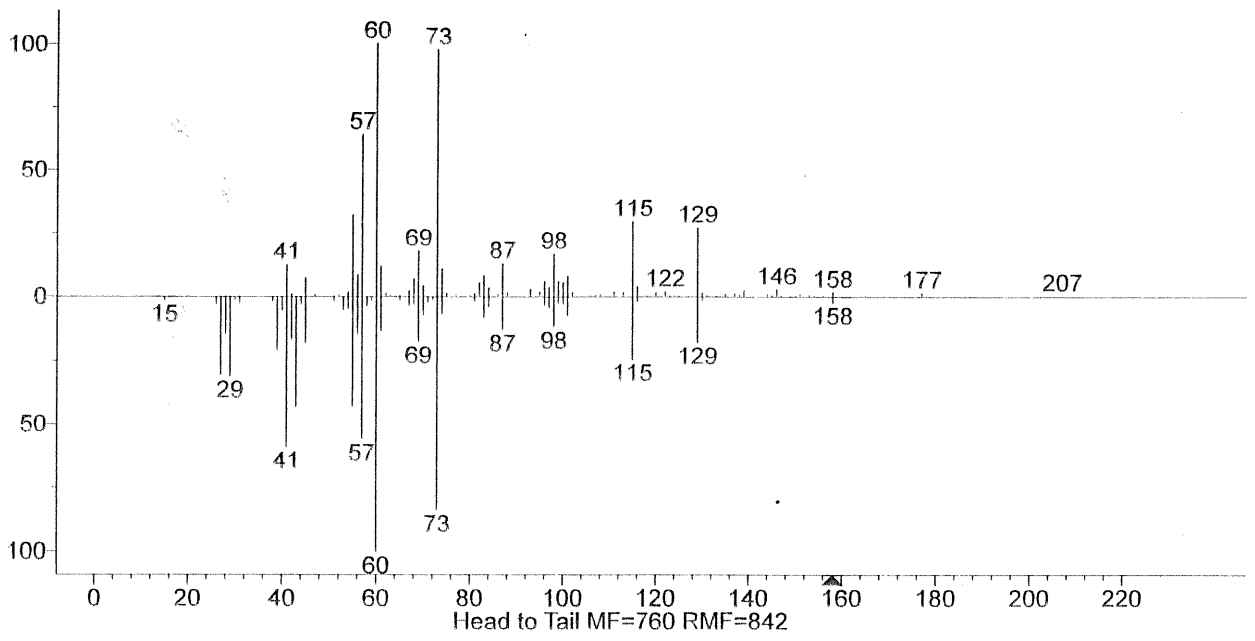

Head to Tail MF=760 RMF=842

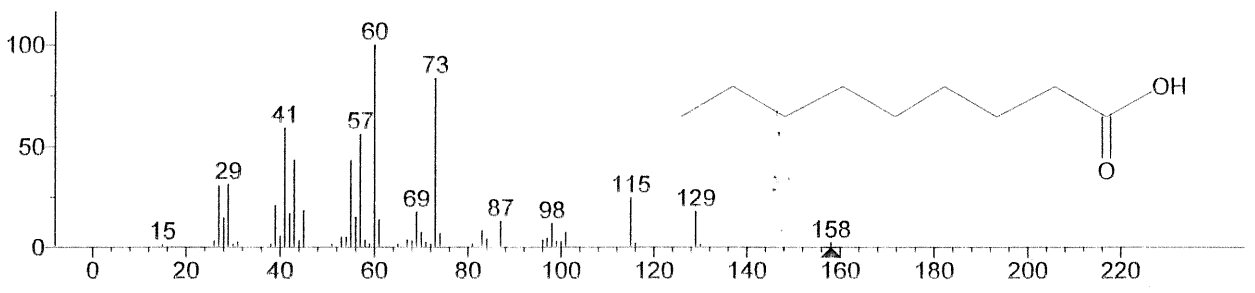

(replib) Nonanoic acid

Name: Nonanoic acid

Formula: C<sub>9</sub>H<sub>18</sub>O<sub>2</sub>

MW: 158 CAS#: 112-05-0 NIST#: 114735 ID#: 6709 DB: replib

Other DBs: Fine, TSCA, RTECS, EPA, HODOC, NIH, EINECS, IRDB

Contributor: NIST Mass Spectrometry Data Center, 1990.

10 largest peaks:

60 999 | 73 836 | 41 590 | 57 559 | 43 433 | 55 431 | 29 311 | 27 304 | 115 244 | 39 207 |

Synonyms:

- 1.n-Nonanoic acid
- 2.n-Nonoic acid
- 3.n-Nonylic acid
- 4.Nonoic acid
- 5.Nonylic acid
- 6.Pelargic acid
- 7.Pelargonic acid
- 8.1-Octanecarboxylic acid
- 9.Cirrasol 185a
- 10.Emfac 1202
- 11.Hexacid C-9
- 12.Pelargon
- 13.Emery's L-114
- 14.Emery 1202

Estimated non-polar retention index (n-alkane scale):

Value: 1272 iu

Confidence interval (Carboxylic acids): 51(50%) 220(95%) iu

Retention index.

1. Value: 1268 iu

Column Type: Capillary

Column Class: Standard non-polar

Active Phase: DB-1

Column

Length: 25 m

Column Diameter: 0.2 mm

Phase Thickness: 0.33 um

Data Type: Linear RI

Program Type:

Ramp

Start T: 50 C

End T: 300 C

Heat Rate: 4 K/min

Source: Osorio, C.; Alarcon, M.; Moreno, C.; Bonilla, A.;

Barrios, J.; Garzon, C.; Duque, C., Characterization of Odor-Active Volatiles in Champa ( *Campomanesia lineatifolia* R. & P.), J. Agric. Food Chem., 54, 2006, 509-516.

2. Value: 1263 iu

Column Type: Capillary

Column Class:

Standard non-polar

Active Phase: CP Sil 5 CB

Column Length: 25 m

Carrier Gas: H<sub>2</sub>

Column Diameter: 0.25

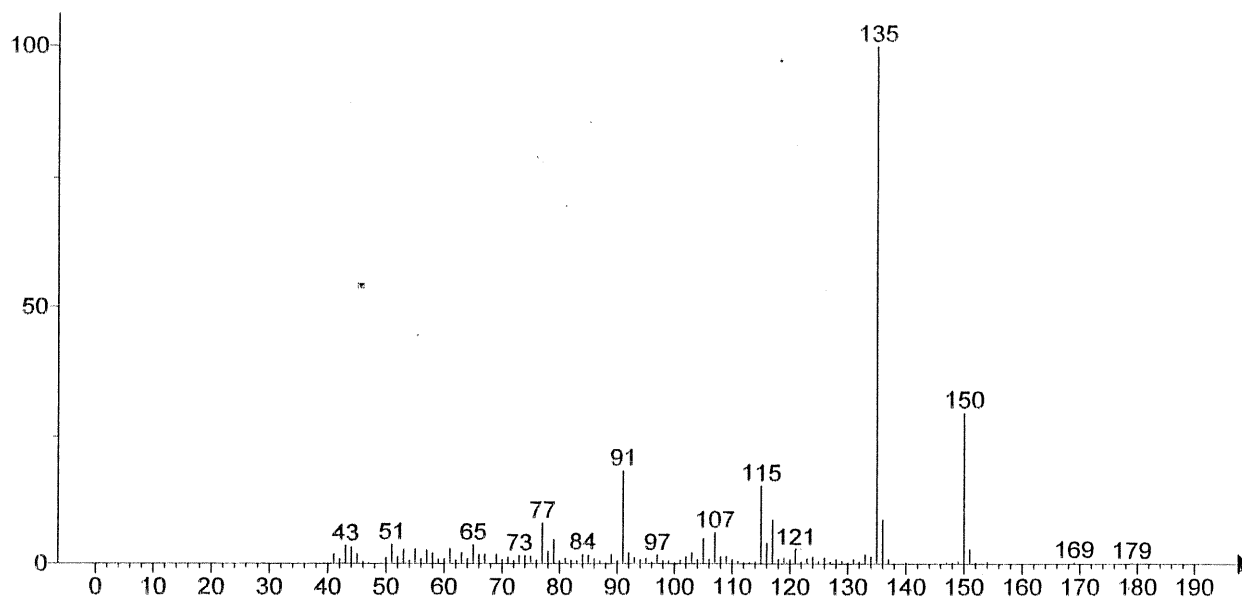

(Text File) +EI Scan (25.985 min) ALI-OLE-H7-220421-.D

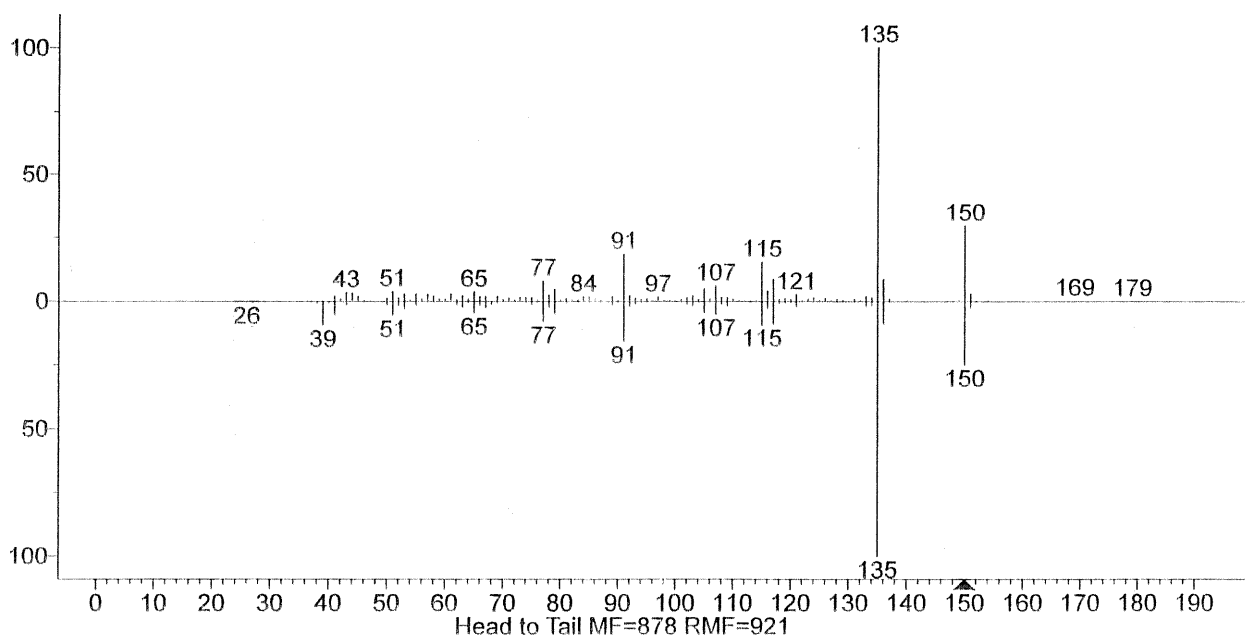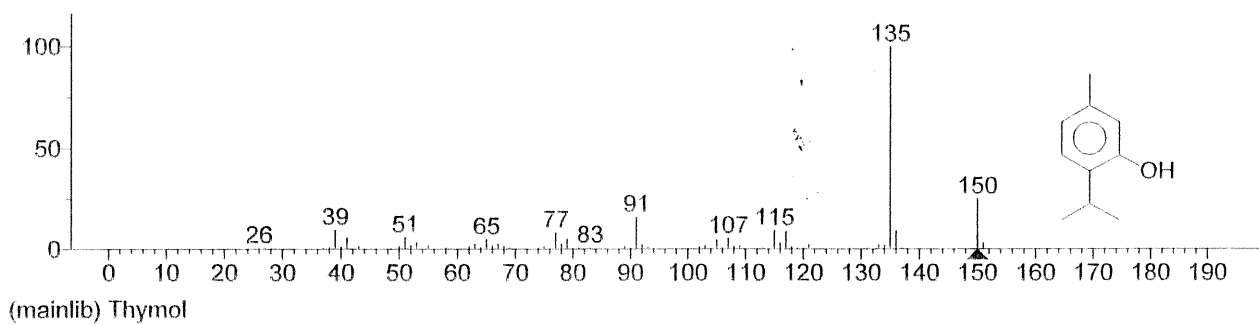

(mainlib) Thymol

Name: Thymol

Formula: C<sub>10</sub>H<sub>14</sub>O

MW: 150 CAS#: 89-83-8 NIST#: 249386 ID#: 97695 DB: mainlib

Other DBs: Fine, TSCA, RTECS, USP, HODOC, NIH, EINECS

Contributor: TNO Volatile Compounds in Food - Chemical Concepts

10 largest peaks:

135 999 | 150 248 | 91 157 | 39 94 | 115 91 | 136 89 | 117 87 | 77 80 | 51 56 | 41 55 |

Synonyms:

1. Phenol, 5-methyl-2-(1-methylethyl)-

2. p-Cymen-3-ol

3. Thyme camphor

4. 2-Isopropyl-5-methylphenol

5. 3-Hydroxy-p-cymene

6. 3-Methyl-6-isopropylphenol

7. 5-Methyl-2-isopropylphenol

8. 6-Isopropyl-m-cresol

9. 6-Isopropyl-3-methylphenol

10. m-Cresol, 6-isopropyl-

11. p-Cymene, 3-hydroxy-

12. Isopropyl cresol

13. Phenol, 2-isopropyl-5-methyl-

14. Thymic acid

15. 1-Hydroxy-5-methyl-2-isopropylbenzene

16. 1-Methyl-3-hydroxy-4-isopropylbenzene

17. 3-p-Cymenol

18. 3-Hydroxy-1-methyl-4-isopropylbenzene

19. 5-Methyl-2-isopropyl-1-phenol

20. 5-Methyl-2-(1-methylethyl)phenol

21. Isopropyl-m-cresol

22. m-Thymol

Estimated non-polar retention index (n-alkane scale):

Value: 1262 iu

Confidence interval (Phenols): 70(50%) 301(95%) iu

Retention index.

1. Value: 1266 iu

Column Type: Capillary

Column Class: Standard non-polar

Active Phase: RTX-1

Column

Length: 60 m

Carrier Gas: He

Column Diameter: 0.22 mm

Phase Thickness: 0.25 um

Data Type: Linear

RI

Program Type: Ramp

Start T: 60 C

End T: 230 C

Heat Rate: 2 K/min

End Time: 30 min

Source: Bendahou,

M.; Muselli, A.; Grignon-Dubois, M.; Benyoucef, M.; Desjobert, J.-M.; Bernardini, A.-F.; Costa, J., Antimicrobial

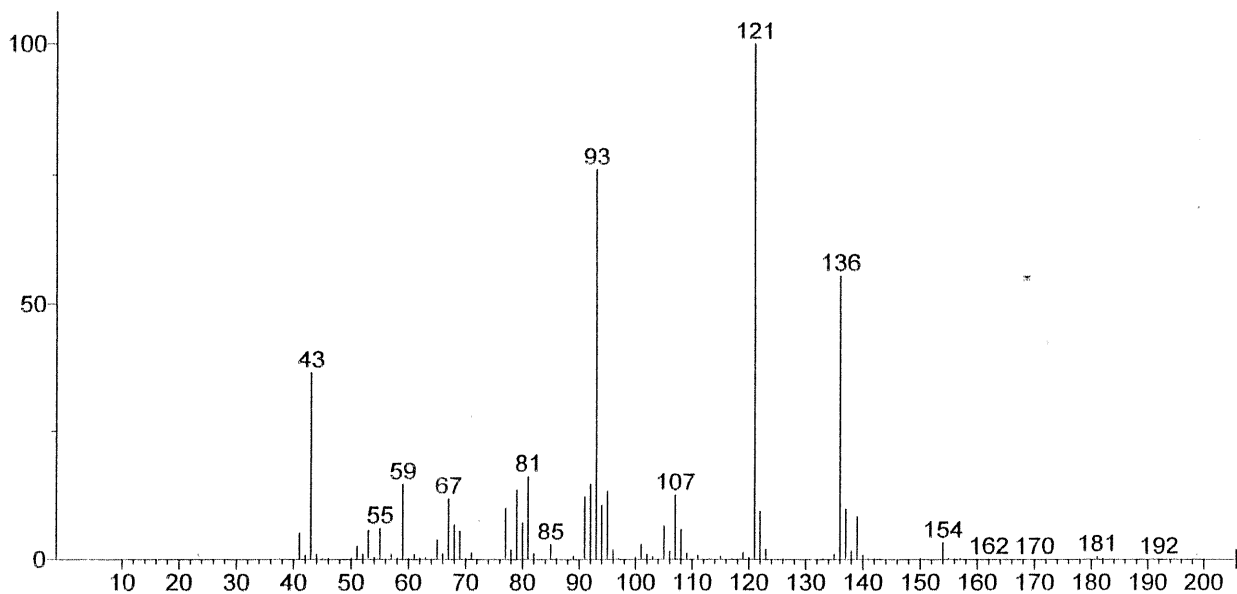

(Text File) +EI Scan (28.102 min) ALI-OLE-H7-220421-.D Subtract

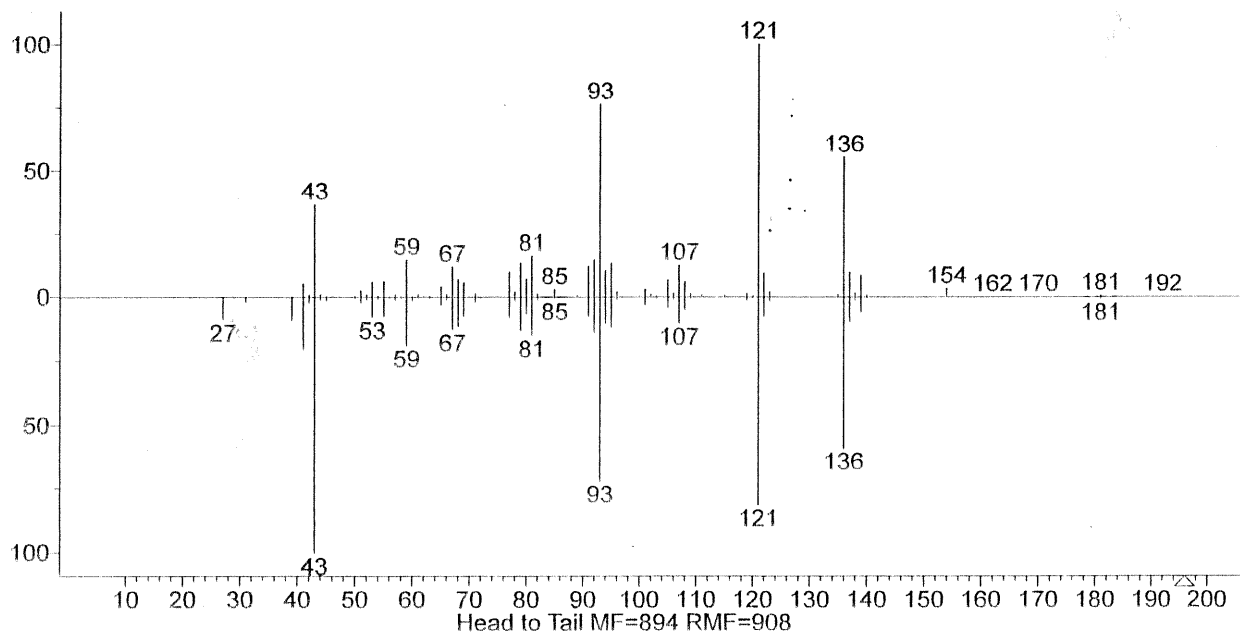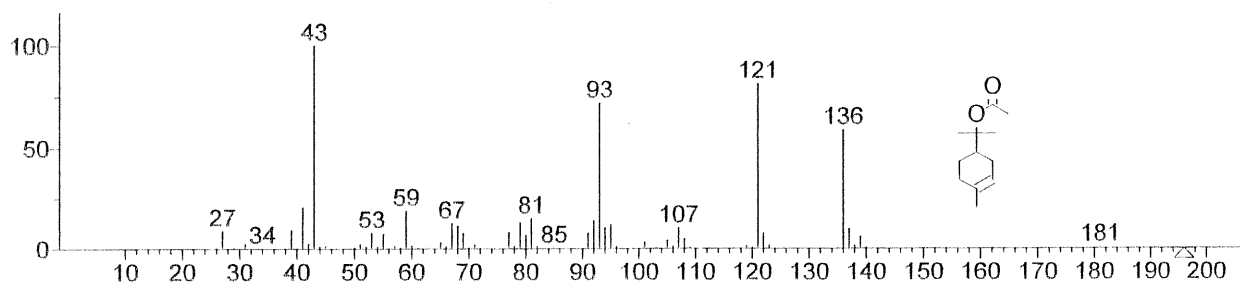

(replib) 3-Cyclohexene-1-methanol,  $\alpha,\alpha,4$ -trimethyl-, acetate

Name: 3-Cyclohexene-1-methanol,  $\alpha,\alpha,4$ -trimethyl-, acetate

Formula:  $C_{12}H_{20}O_2$

MW: 196 CAS#: 80-26-2 NIST#: 249543 ID#: 2926 DB: replib

Other DBs: Fine, TSCA, RTECS, HODOC, EINECS

Contributor: TNO Volatile Compounds in Food - Chemical Concepts

10 largest peaks:

43 999 | 121 812 | 93 718 | 136 586 | 41 205 | 59 188 | 81 150 | 92 138 | 79 129 | 67 126 |

Synonyms:

1. p-Menth-1-en-8-ol, acetate

2.  $\alpha$ -Terpineol acetate

3.  $\alpha$ -Terpinyl acetate

4. Terpinyl acetate

5. 1-Methyl-1-(4-methyl-3-cyclohexen-1-yl)ethyl acetate #

Estimated non-polar retention index (n-alkane scale):

Value: 1333 iu

Confidence interval (Esters): 47(50%) 201(95%) iu

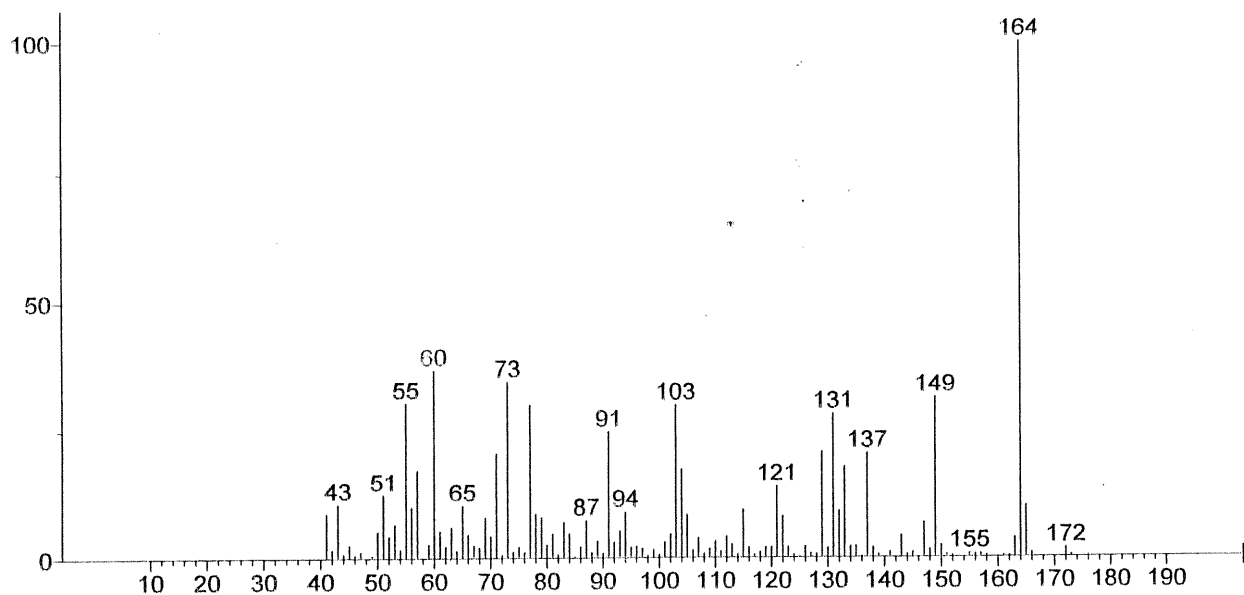

(Text File) +EI Scan (28.366 min) ALI-OLE-H7-220421-.D Subtract

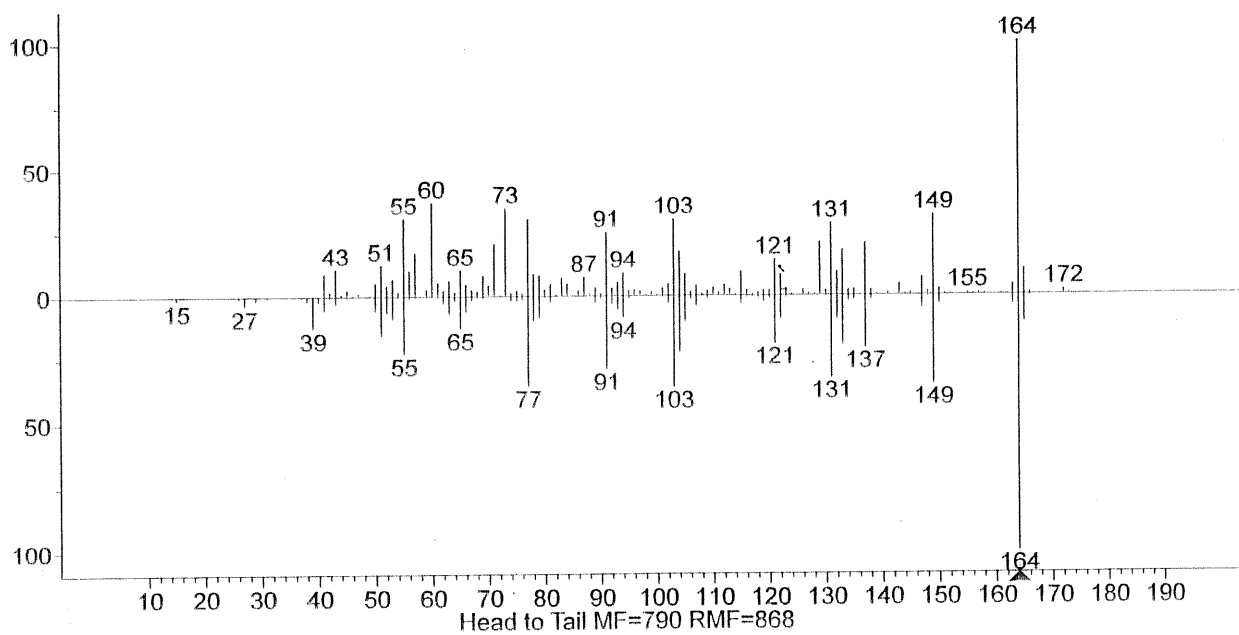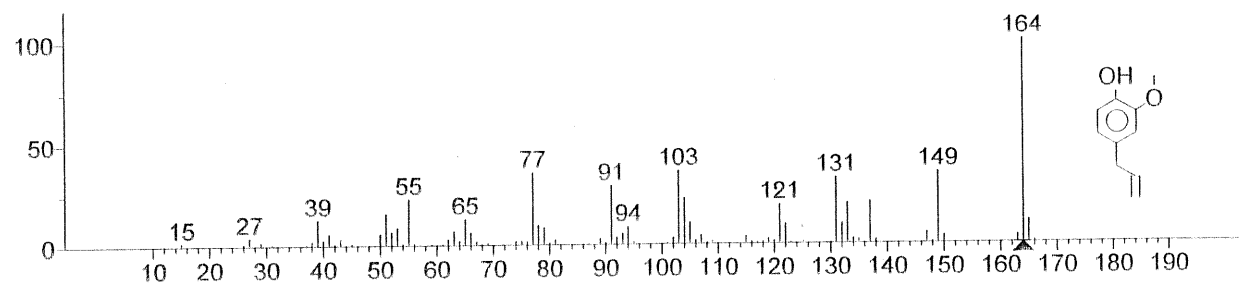

(mainlib) Eugenol

Name: Eugenol

Formula: C<sub>10</sub>H<sub>12</sub>O<sub>2</sub>

MW: 164 CAS#: 97-53-0 NIST#: 291519 ID#: 121999 DB: mainlib

Other DBs: Fine, TSCA, RTECS, EPA, USP, HODOC, NIH, EINECS, IRDB

Contributor: NIST Mass Spectrometry Data Center, 1998.

10 largest peaks:

164 999 | 103 360 | 77 355 | 149 350 | 131 323 | 91 288 | 55 227 | 104 225 | 137 207 | 133 197 |

Synonyms:

1. Phenol, 2-methoxy-4-(2-propenyl)-
2. Phenol, 4-allyl-2-methoxy-
3. p-Allylguaiacol
4. p-Eugenol
5. Caryophyllic acid
6. Engenol
7. Eugenol
8. 2-Methoxy-1-hydroxy-4-allylbenzene
9. 2-Methoxy-4-allylphenol
10. 4-Allyl-2-methoxyphenol
11. 4-Allylguaiacol
12. 4-Hydroxy-3-methoxyallylbenzene
13. NCI-C50453
14. 1-Hydroxy-2-methoxy-4-allylbenzene
15. 1-Hydroxy-2-methoxy-4-prop-2-enylbenzene
16. 2-Methoxy-4-(2-propenyl)phenol
17. 2-Methoxy-4-prop-2-enylphenol
18. 4-Allyl-1-hydroxy-2-methoxybenzene
19. 4-Allylcatechol-2-methyl ether
20. 1,3,4-Eugenol
21. FA 100
22. Fema no. 2467
23. 2-Metoksy-4-allylofenol
24. 2-Hydroxy-5-allylanisole
25. 2-Methoxy-4-(2-propenyl)phenyl
26. Allylguaiacol

Estimated non-polar retention index (n-alkane scale):

Value: 1392 iu

Confidence interval (Diverse functional groups): 89(50%) 382(95%) iu

Retention index.

1. Value: 1337 iu

Column Type: Capillary

Column Class: Standard non-polar

Active Phase: BP-1

Column

Length: 50 m

Carrier Gas: He

Column Diameter: 0.22 mm

Phase Thickness: 0.25 µm

Data Type: Linear

RI

Program Type: Ramp

Start T: 60 C

End T: 220 C



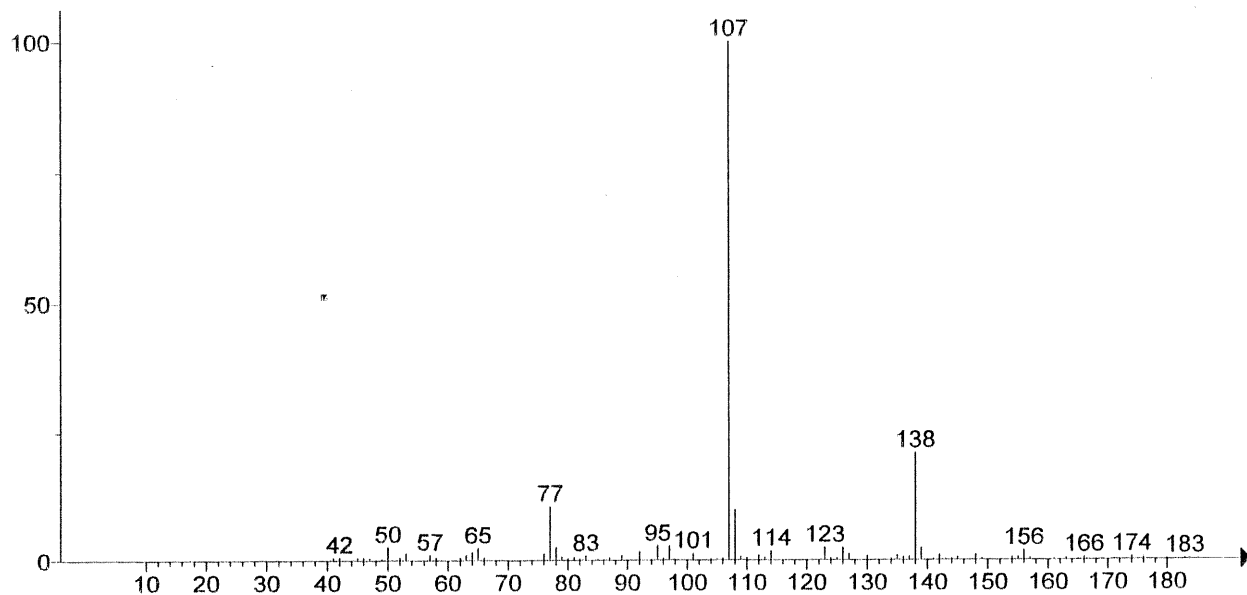

(Text File) +EI Scan (30.607 min) ALI-OLE-H7-220421-.D Subtract

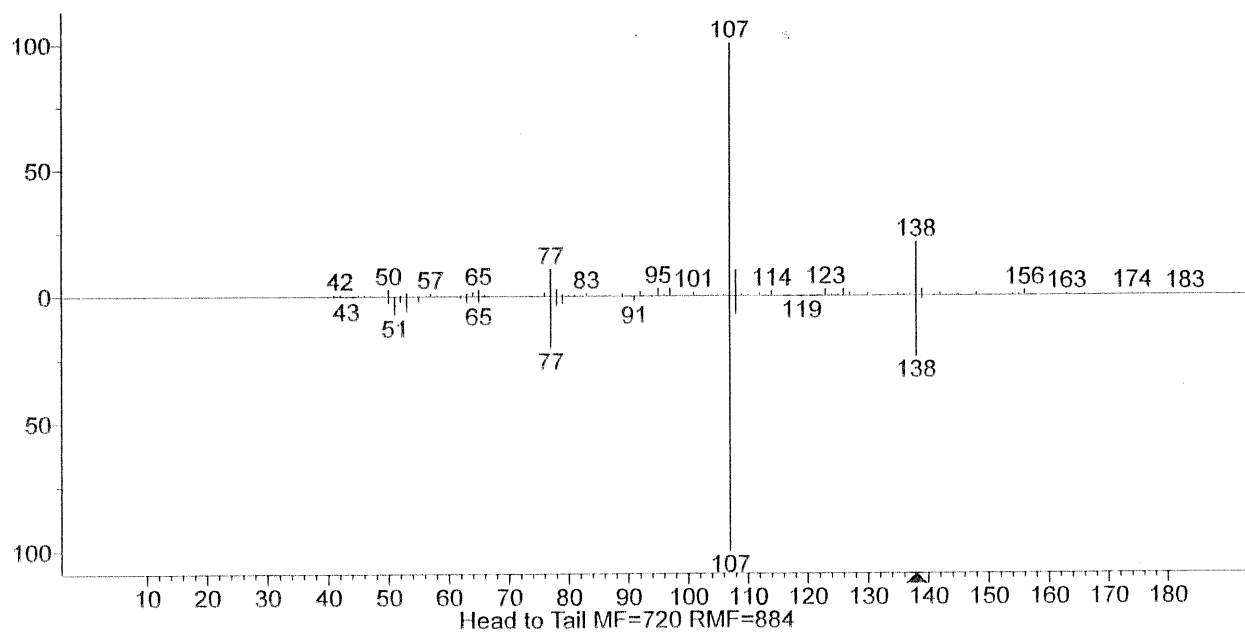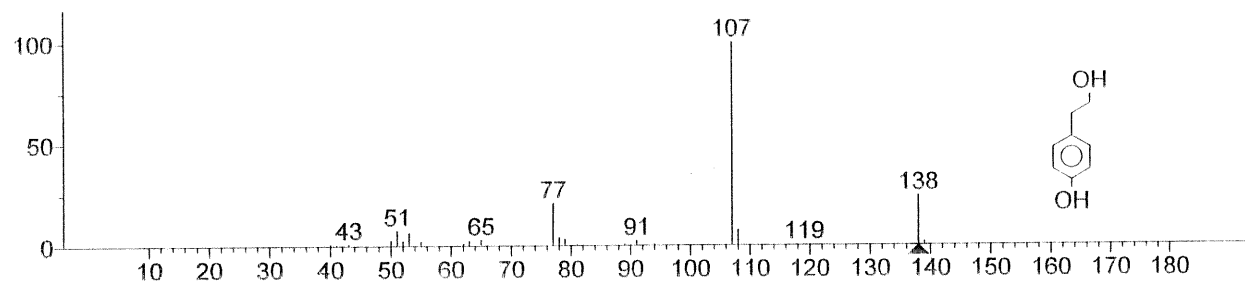

(replib) Benzeneethanol, 4-hydroxy-

Name: Benzeneethanol, 4-hydroxy-

Formula: C<sub>8</sub>H<sub>10</sub>O<sub>2</sub>

MW: 138 CAS#: 501-94-0 NIST#: 92403 ID#: 14558 DB: replib

Other DBs: Fine, TSCA, HODOC, NIH, EINECS

Contributor: J.E. WILKINSON S-CUBED, SAN DIEGO, CA.

10 largest peaks:

107 999 | 138 239 | 77 205 | 108 74 | 51 73 | 53 62 | 78 39 | 79 31 | 65 27 | 50 24 |

Synonyms:

1. 4-(2-Hydroxyethyl)phenol

2. p-Hydroxyphenethyl alcohol

3. 4-Hydroxyphenethyl alcohol

4. β-(p-Hydroxyphenyl)ethanol

5. β-(4-Hydroxyphenyl)ethanol

6. 2-(p-Hydroxyphenyl)ethanol

7. 2-(4-Hydroxyphenyl)ethanol

8. 4-Hydroxyphenylethanol

9. Phenethyl alcohol, p-hydroxy-

10. p-Tyrosol

11. Tyrosol

12. p-Tyrosol

13. 4-Hydroxyphenylethyl alcohol

14. p-Hydroxyphenylethyl alcohol

Estimated non-polar retention index (n-alkane scale):

Value: 1356 iu

Confidence interval (Diverse functional groups): 89(50%) 382(95%) iu

Retention index.

1. Value: 1451 iu

Column Type: Capillary

Column Class: Semi-standard non-polar

Active Phase: HP

-5MS

Column Length: 30 m

Carrier Gas: He

Column Diameter: 0.25 mm

Phase Thickness: 0.25 μm

Data Type:

Normal alkane RI

Program Type: Complex

Description: 40C(3min)=> 2C/min=>180C=>10C/min=>250C(5min)

Source: Alissandrakis, E.; Kibaris, A.C.; Tarantilis, P.A.; Harizanis, P.C.; Polissiou, M., Flavour compounds of Greek cotton honey, J. Sci. Food Agric., 85, 2005, 1444-1452.

2. Value: 1478 iu

Column Type:

Capillary

Column Class: Semi-standard non-polar

Active Phase: SPB-5

Column Length: 30 m

Carrier Gas:

He

Column Diameter: 0.53 mm

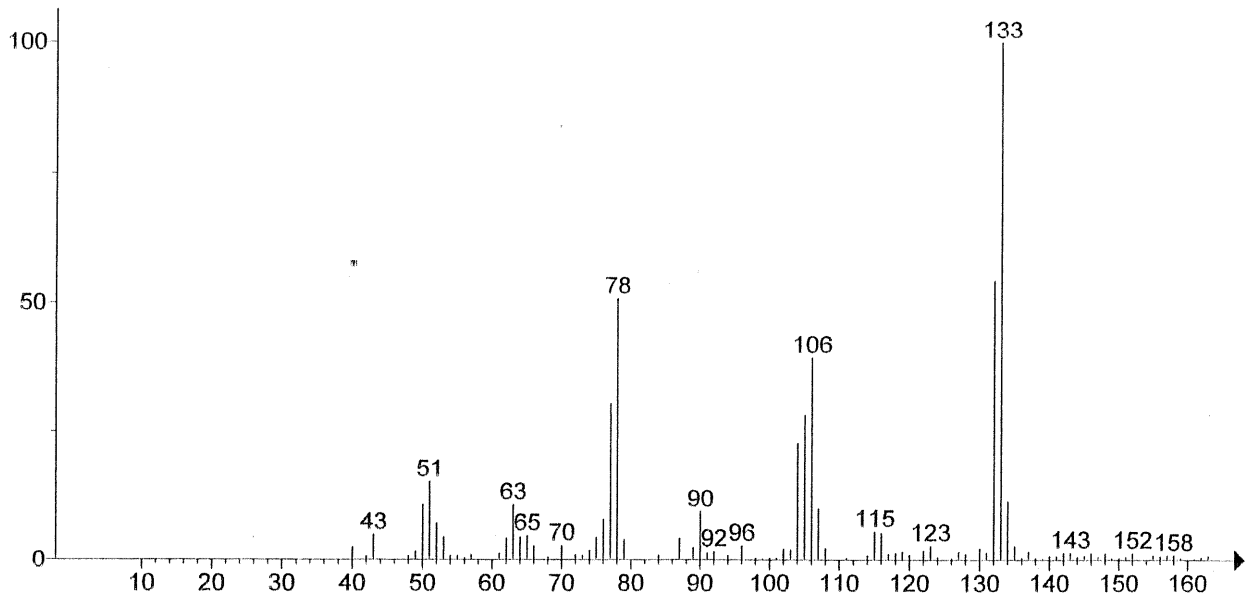

(Text File) +EI Scan (32.172 min) ALI-OLE-H7-220421-.D Subtract

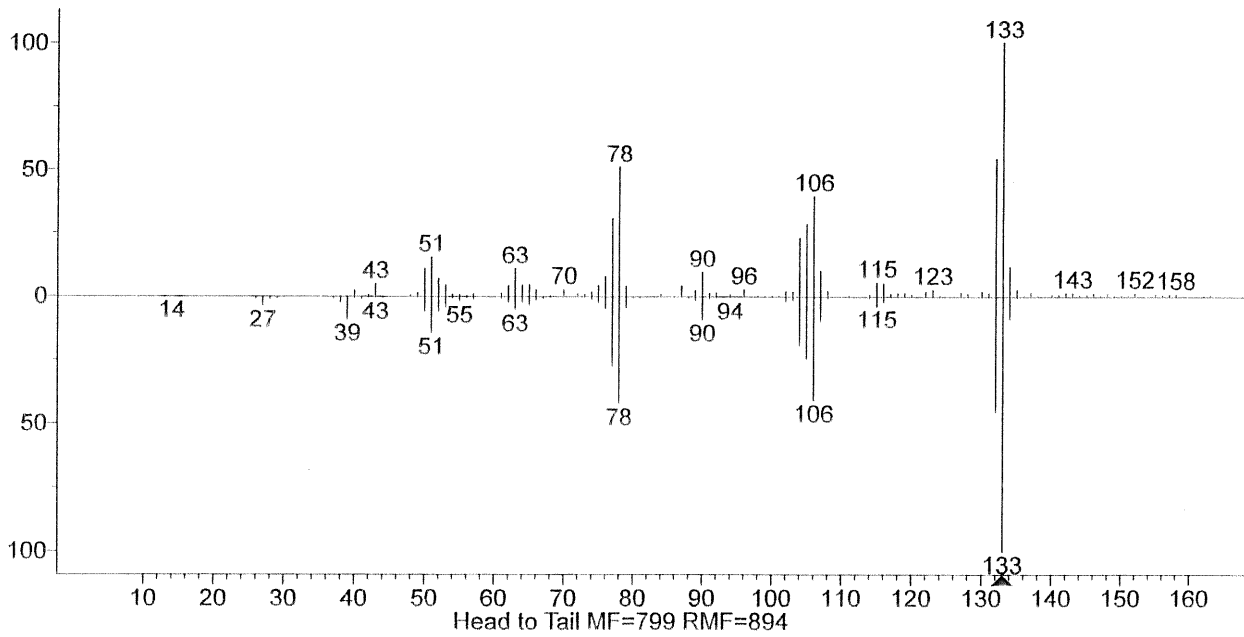

Head to Tail MF=799 RMF=894

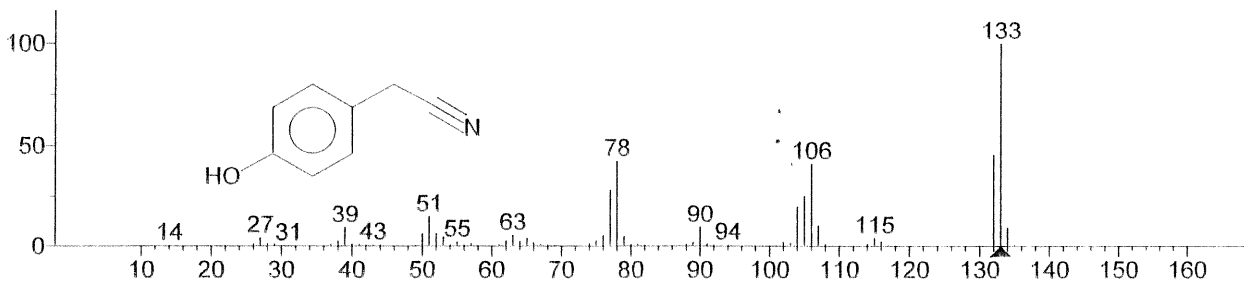

(mainlib) Benzeneacetonitrile, 4-hydroxy-

Name: Benzeneacetonitrile, 4-hydroxy-

Formula: C<sub>8</sub>H<sub>7</sub>NO

MW: 133 CAS#: 14191-95-8 NIST#: 236771 ID#: 94894 DB: mainlib

Other DBs: Fine, RTECS, HODOC, NIH, EINECS

Contributor: Japan AIST/NIMC Database- Spectrum MS-NW-8839

10 largest peaks:

133 999 | 132 454 | 78 421 | 106 407 | 77 277 | 105 247 | 104 195 | 51 145 | 107 100 | 90 92 |

Synonyms:

1. Acetonitrile, (p-hydroxyphenyl)-

2. (4-Hydroxyphenyl)acetonitrile

3. p-Hydroxybenzyl cyanide

4. p-Hydroxyphenylacetonitrile

5. 4-Hydroxybenzyl cyanide

Estimated non-polar retention index (n-alkane scale):

Value: 1359 iu

Confidence interval (Diverse functional groups): 89(50%) 382(95%) iu

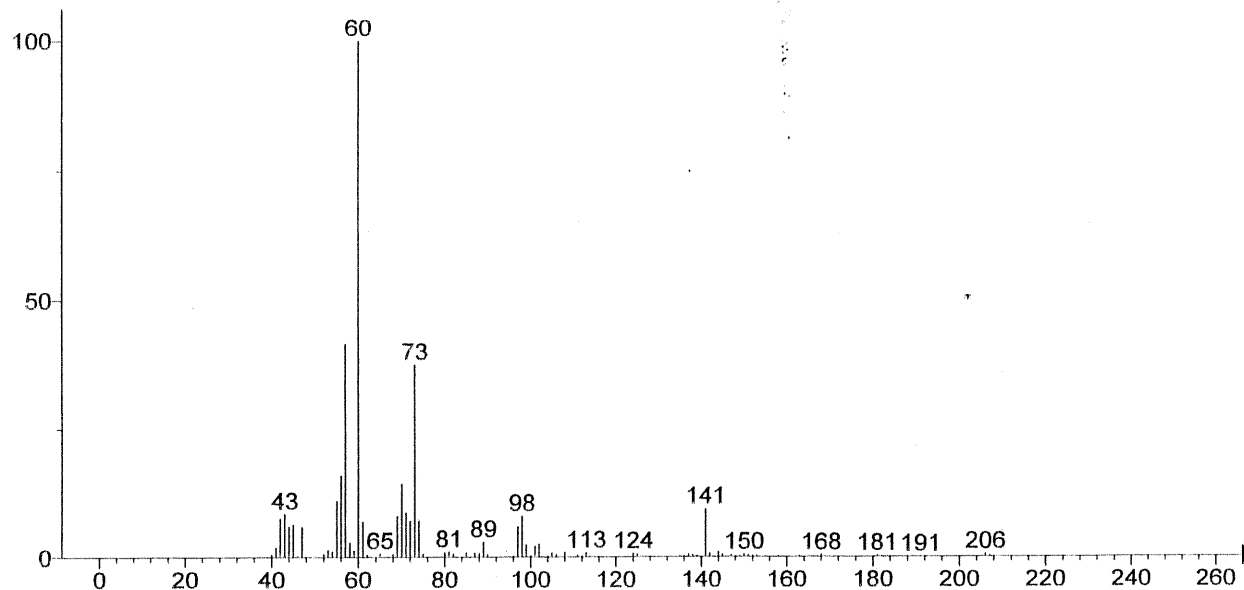

(Text File) +EI Scan (32.956 min) ALI-OLE-H7-220421-D Subtract

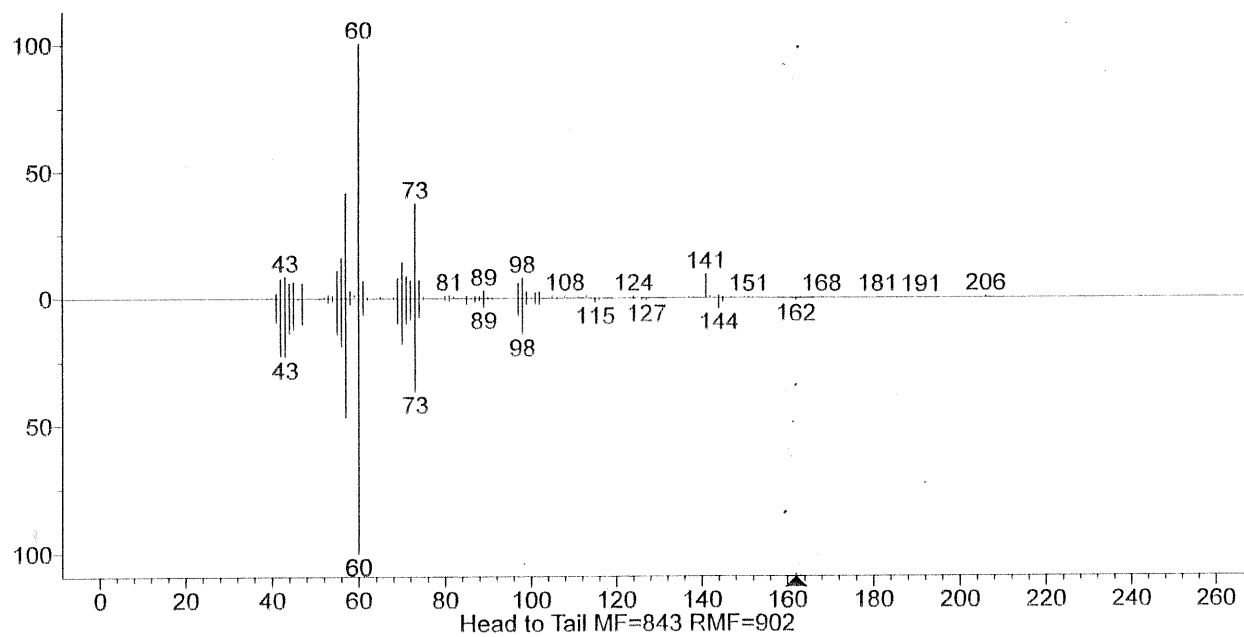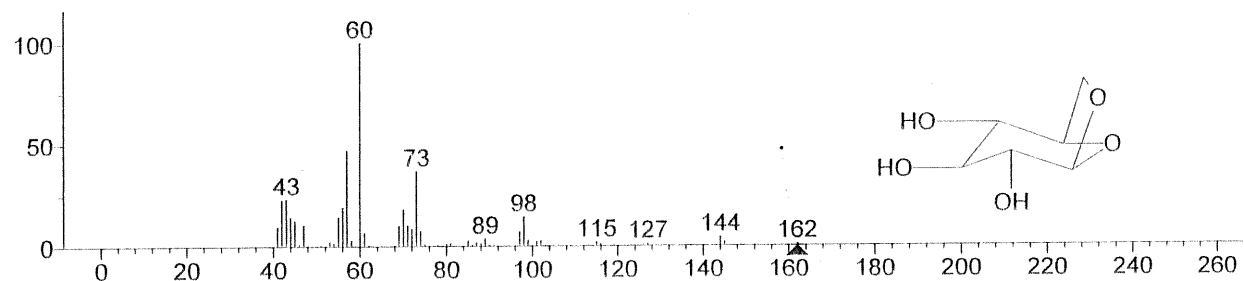

(replib)  $\beta$ -D-Glucopyranose, 1,6-anhydro-

Name:  $\beta$ -D-Glucopyranose, 1,6-anhydro-

Formula:  $C_6H_{10}O_5$

MW: 162 CAS#: 498-07-7 NIST#: 127044 ID#: 6692 DB: replib

Other DBs: NIH, EINECS

Contributor: LAC, NIDDK, NIH, Bethesda, MD 20892

10 largest peaks:

60 999 | 57 468 | 73 366 | 43 230 | 42 225 | 56 190 | 70 181 | 55 143 | 98 143 | 44 141 |

Synonyms:

1. Anhydro-d-mannosan

2. Levoglucosan

3. 1,6-Anhydro- $\beta$ -D-glucopyranose

Estimated non-polar retention index (n-alkane scale):

Value: 1404 iu

Confidence interval (Diverse functional groups): 89(50%) 382(95%) iu

Retention index.

1. Value: 1426.2 iu

Column Type: Capillary

Column Class: Standard non-polar

Active Phase: DB-1

Column

Length: 60 m

Carrier Gas: He

Column Diameter: 0.25 mm

Data Type: Normal alkane RI

Program Type:

Ramp

Start T: 50 C

End T: 275 C

Heat Rate: 4 K/min

Start Time: 2 min

Source: Ralph, J.; Hatfield, R.D.,

Pyrolysis-GC-MS Characterization of Forage Materials, J. Agric. Food Chem., 39, 1991, 1426-1437.

2. Value:

1491.1 iu

Column Type: Capillary

Column Class: Semi-standard non-polar

Active Phase: LM-5

Column Length:

30 m

Carrier Gas: He

Column Diameter: 0.25 mm

Phase Thickness: 0.25  $\mu$ m

Data Type: Linear RI

Program

Type: Complex

Description: 60C(2min) =>15C/min =>180C =>5C/min =>280C (10min)

Source: Ré-Poppi, N.;

Santiago-Silva, M., Polycyclic aromatic hydrocarbons and other selected organic compounds in ambient air of Campo Grande City, Brazil, Atmos. Environ., 39, 2005, 2839-2850.

<...>

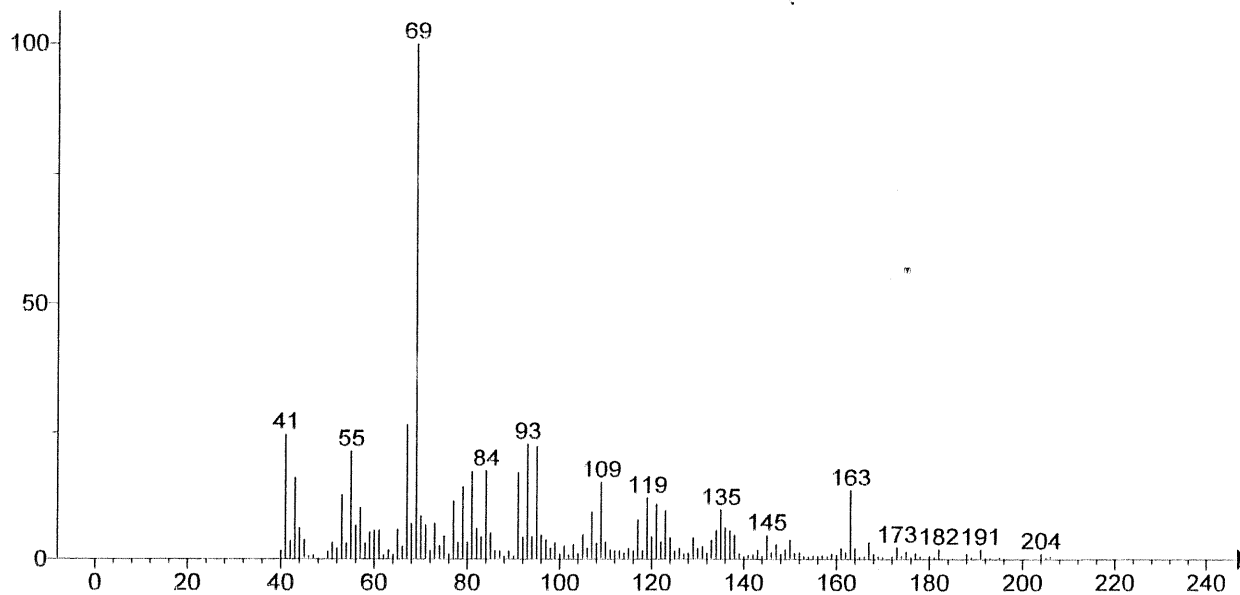

(Text File) +EI Scan (33.779 min) ALI-OLE-H7-220421-.D

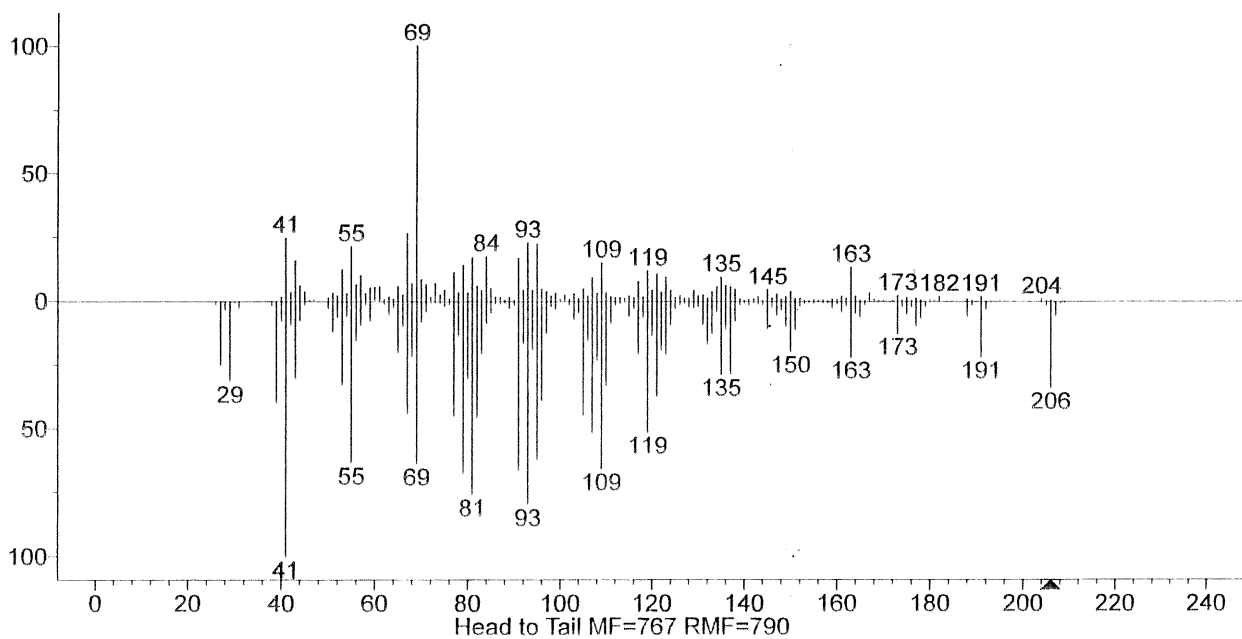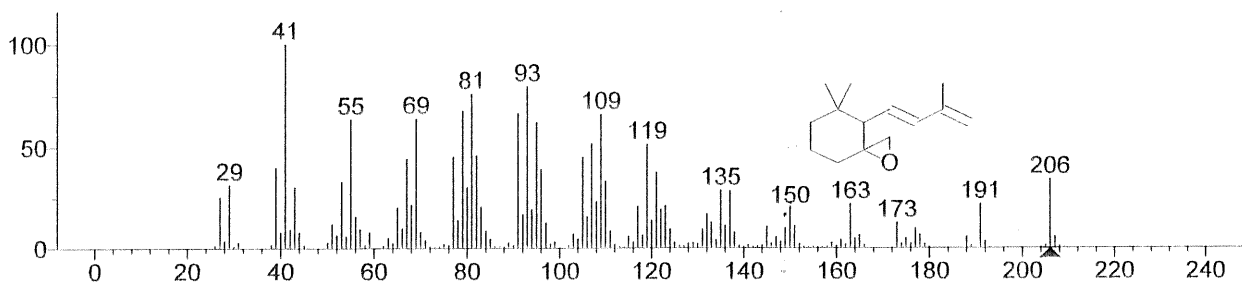

(mainlib) 1-Oxaspiro[2.5]octane, 5,5-dimethyl-4-(3-methyl-1,3-butadienyl)-

Name: 1-Oxaspiro[2.5]octane, 5,5-dimethyl-4-(3-methyl-1,3-butadienyl)-

Formula: C<sub>14</sub>H<sub>22</sub>O

MW: 206 NIST#: 195921 ID#: 3527 DB: mainlib

Contributor: Chemical Concepts

10 largest peaks:

41 999 | 93 794 | 81 757 | 79 675 | 91 664 | 109 657 | 69 637 | 55 633 | 95 619 | 107 517 |

Synonyms:

no synonyms.

Estimated non-polar retention index (n-alkane scale):

Value: 1431 iu

Confidence interval (Ethers): 68(50%) 293(95%) iu



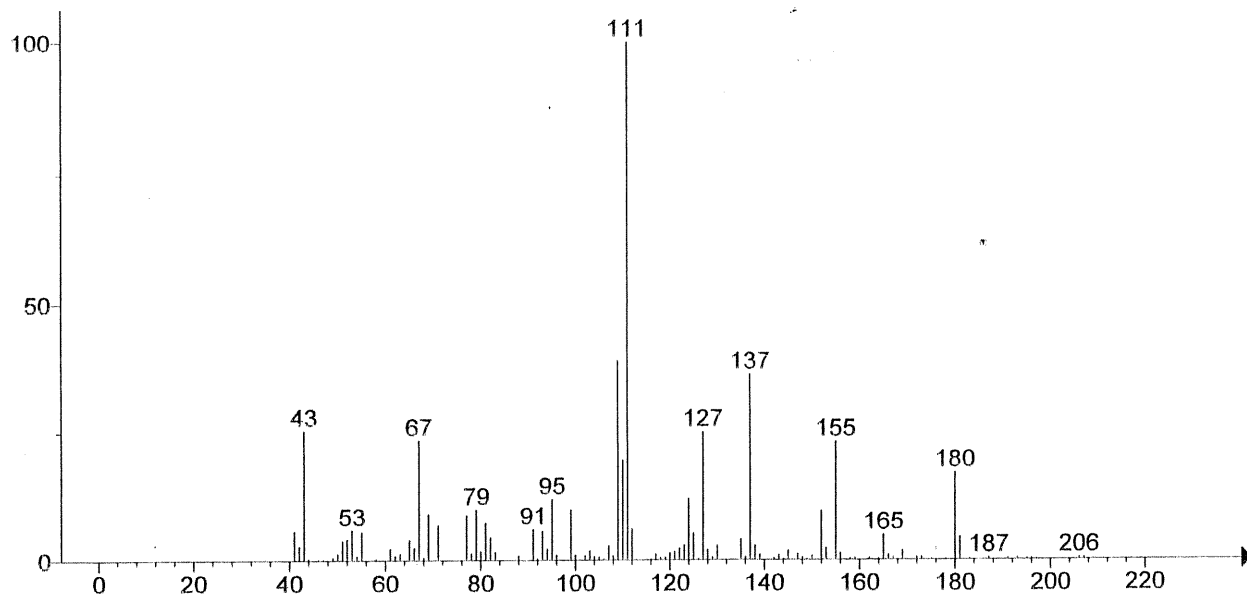

(Text File) +EI Scan (34.275 min) ALI-OLE-H7-220421-.D Subtract

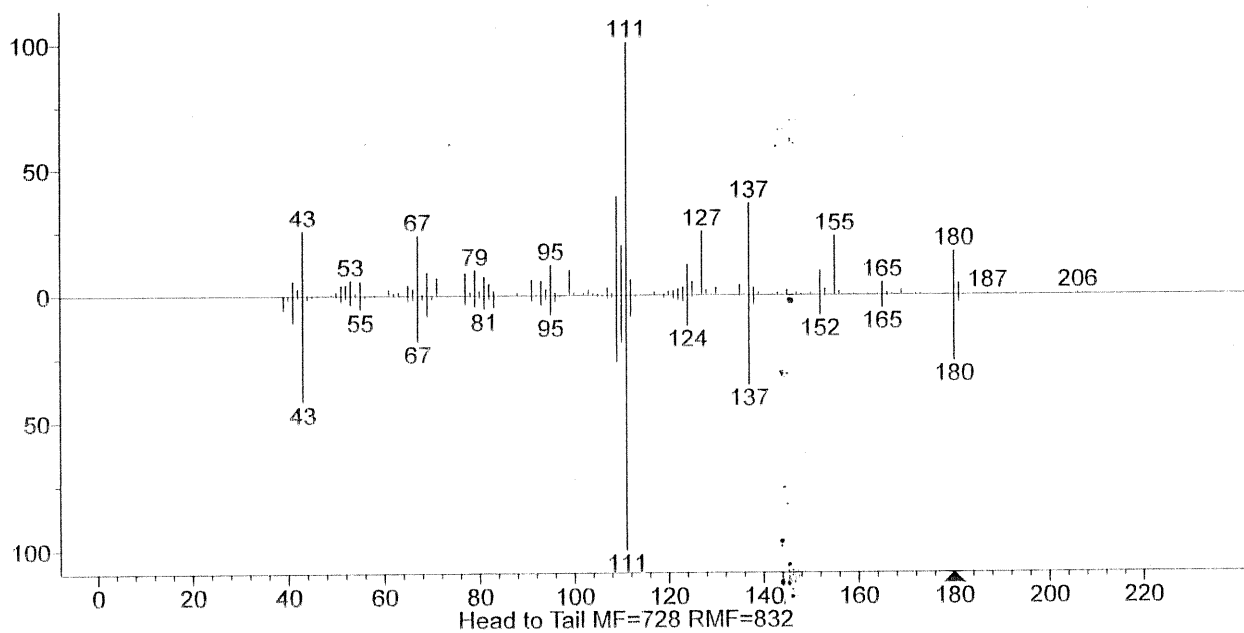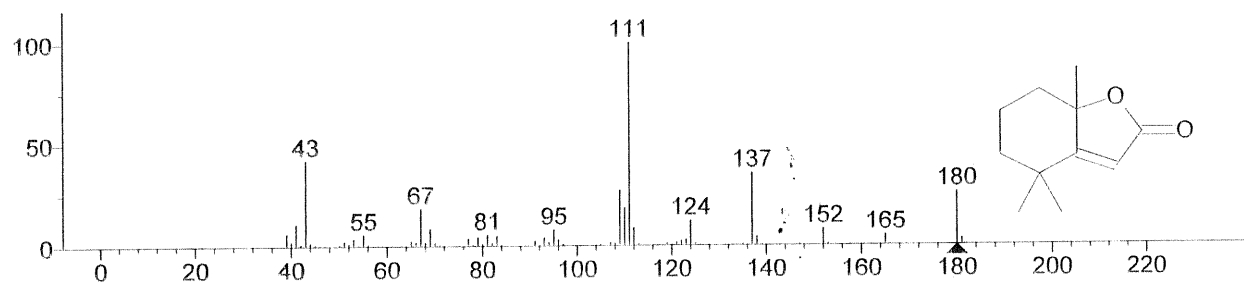

(mainlib) 2(4H)-Benzofuranone, 5,6,7,7a-tetrahydro-4,4,7a-trimethyl-, (R)-

Name: 2(4H)-Benzofuranone, 5,6,7,7a-tetrahydro-4,4,7a-trimethyl-, (R)-

Formula: C<sub>11</sub>H<sub>16</sub>O<sub>2</sub>

MW: 180 CAS#: 17092-92-1 NIST#: 108912 ID#: 74534 DB: mainlib

Other DBs: NIH

Contributor: Philip Morris R&D

10 largest peaks:

111 999 | 43 418 | 137 353 | 109 268 | 180 259 | 110 184 | 67 181 | 124 119 | 41 106 | 112 85 |

Synonyms:

1.2(4H)-Benzofuranone, 5,6,7,7a-tetrahydro-4,4,7a-trimethyl-

2.Actinidiolide, dihydro-

3.2(4H)-Benzofuranone, 5,6,7,7a-tetrahydro-4,4,7a-trimethyl-, (S)-

4.Dihydroactinidiolide

5.4,4,7a-Trimethyl-5,6,7,7a-tetrahydro-1-benzofuran-2(4H)-one #

Estimated non-polar retention index (n-alkane scale):

Value: 1426 iu

Confidence interval (Esters): 47(50%) 201(95%) iu

Retention index.

1. Value: 1532 iu

Column Type: Capillary

Column Class: Standard non-polar

Active Phase: HP-1

Column

Length: 50 m

Carrier Gas: He

Column Diameter: 0.32 mm

Phase Thickness: 1.05 um

Data Type: Linear

RI

Program Type: Complex

Description: 20C(0.5min) =>60C=>4C/min=>250C

Source: Sing, A.S.C.; Smadja, J.;

Brevard, H.; Maignial, L.; Chaintreau, A.; Marion, J.-P., Volatile constituents of faham (*Jumellea fragrans* (Thou.)

Schltr.), J. Agric. Food Chem., 40, 1992, 642-646.

2. Value: 1471 iu

Column Type: Capillary

Column Class:

Standard non-polar

Active Phase: SPB-1

Column Length: 30 m

Carrier Gas: He

Column Diameter: 0.32

mm

Phase Thickness: 0.25 um

Data Type: Kovats RI

Program Type: Complex

Description: 40C(3min)

=>2C/min =>100C=>4C/min =>220C (7min)

Source: Borse, B.B.; Jagan Mohan Rao, L.; Nagalakshmi, S.;

Krishnamurthy, N., Fingerprint of black teas from India: identification of the regio-specific characteristics, Food Chem., 79, 2002, 419-424.

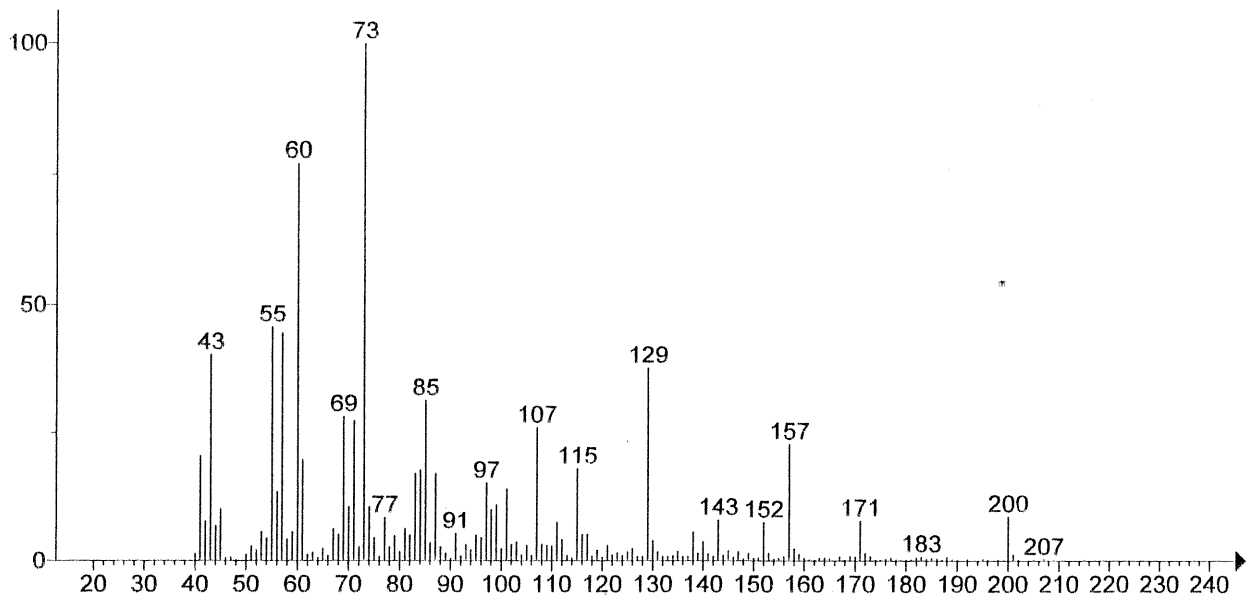

(Text File) +EI Scan (34.635 min) ALI-OLE-H7-220421-.D

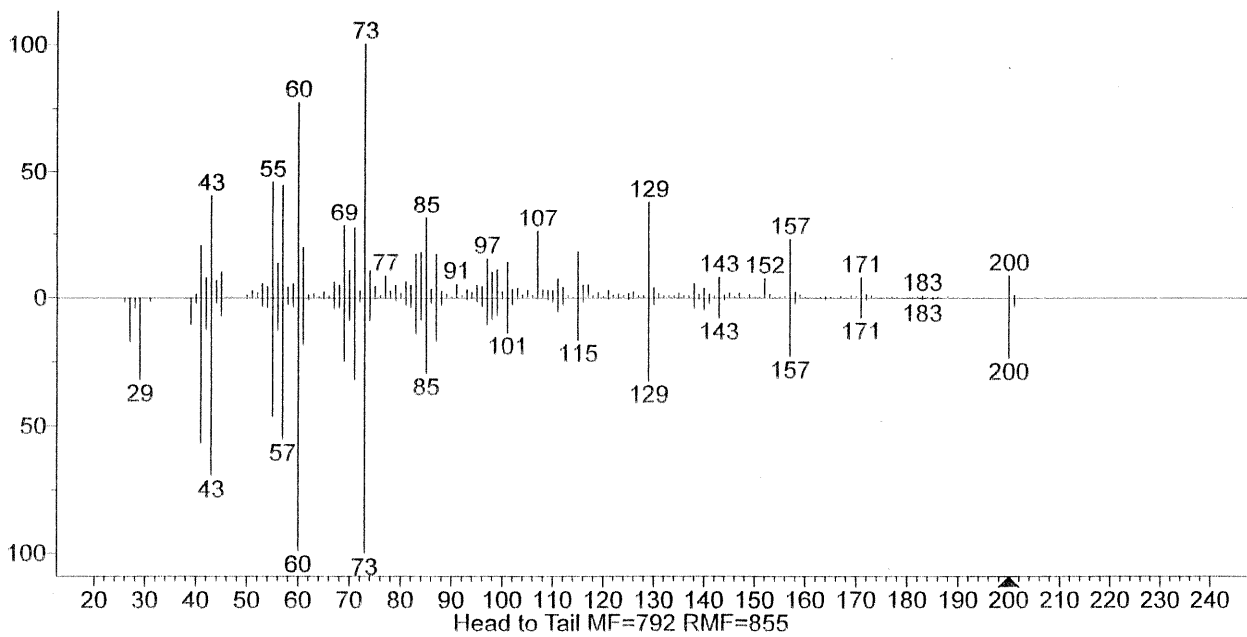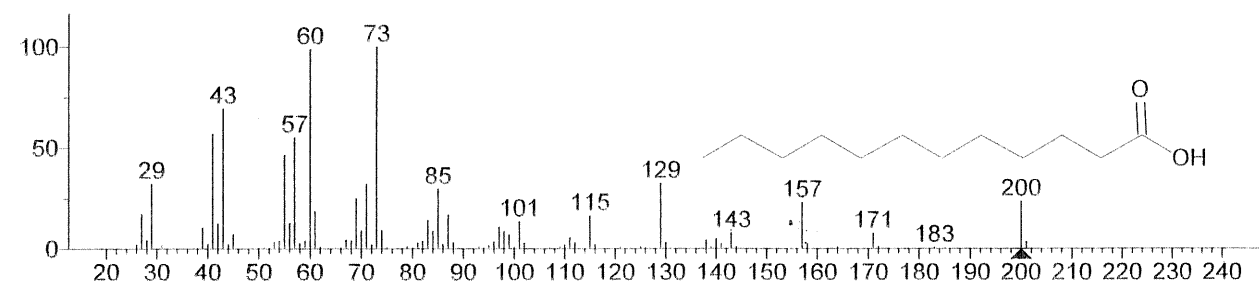

(mainlib) Dodecanoic acid

Name: Dodecanoic acid

Formula:  $C_{12}H_{24}O_2$

MW: 200 CAS#: 143-07-7 NIST#: 221043 ID#: 35324 DB: mainlib

Other DBs: Fine, TSCA, RTECS, EPA, HODOC, NIH, EINECS, IRDB

Contributor: Chemical Concepts

10 largest peaks:

73 999 | 60 987 | 43 693 | 41 567 | 57 550 | 55 463 | 129 323 | 29 320 | 71 320 | 85 295 |

Synonyms:

- 1.n-Dodecanoic acid
- 2.Neo-fat 12
- 3.Aliphat no. 4
- 4.Abl
- 5.Dodecylic acid
- 6.Lauric acid
- 7.Laurostearic acid
- 8.Neo-fat 12-43
- 9.Ninol aa62 extra
- 10.Univol u-314
- 11.Vulvic acid
- 12.1-Undecanecarboxylic acid
- 13.Duodecylic acid
- 14.C-1297
- 15.Coconut oil fatty acids
- 16.Hydrofol acid 1255
- 17.Hydrofol acid 1295
- 18.Wecoline 1295
- 19.Dodecoic acid
- 20.Hystrene 9512
- 21.Lunac L 70
- 22.Duodecyclic acid
- 23.Emery 650
- 24.n-Dodecanoate
- 25.Philacid 1200
- 26.Prifrac 2920
- 27.Undecane-1-carboxylic acid

Estimated non-polar retention index (n-alkane scale):

Value: 1570 iu

Confidence interval (Carboxylic acids): 51(50%) 220(95%) iu

Retention index.

1. Value: 1556 iu

Column Type: Capillary

Column Class: Standard non-polar

Active Phase: RTX-1

Column

Length: 60 m

Carrier Gas: He

Column Diameter: 0.22 mm

Phase Thickness: 0.25  $\mu$ m

Data Type: Linear

RI

Program Type: Ramp

Start T: 60 C

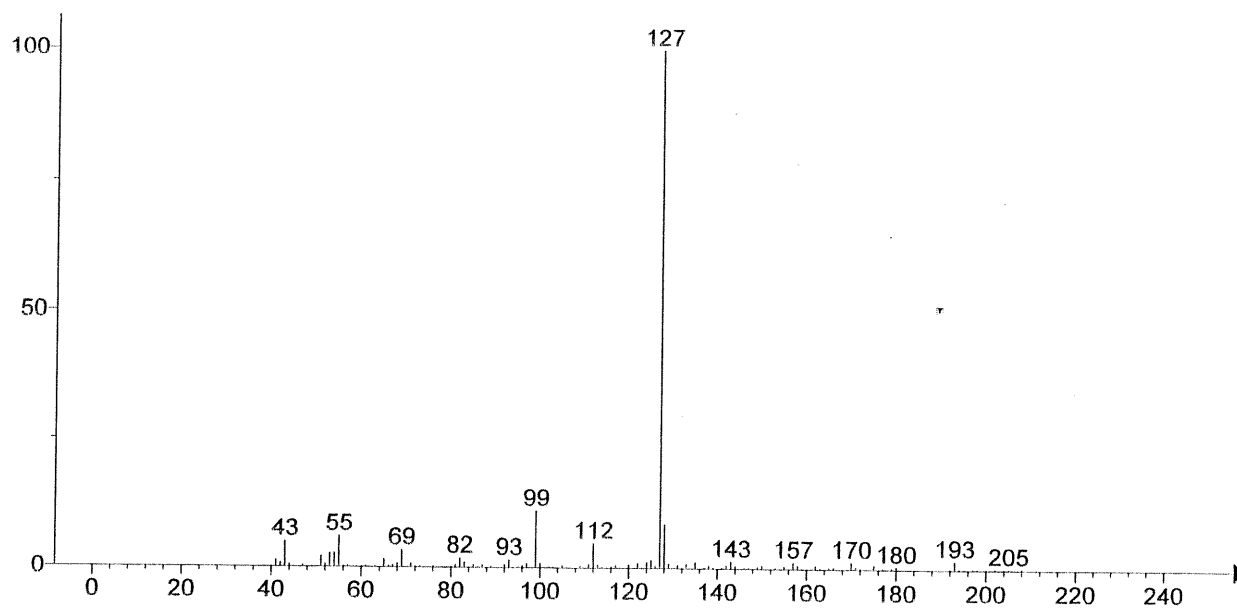

(Text File) +EI Scan (35.123 min) ALI-OLE-H7-220421-.D Subtract

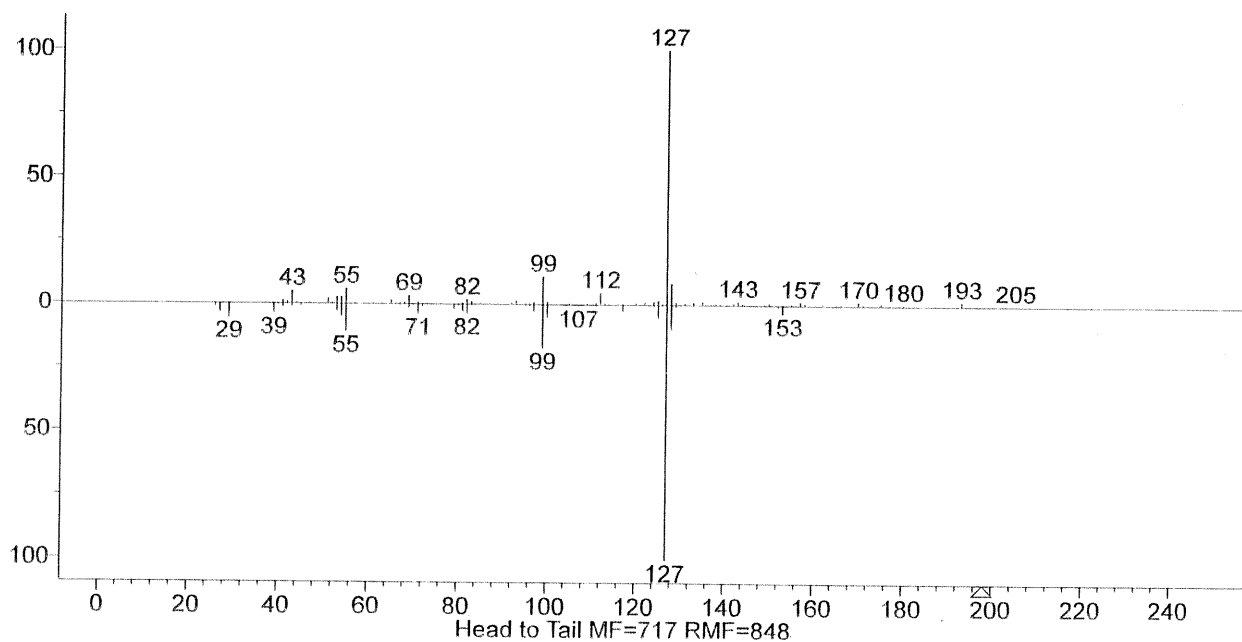

Head to Tail MF=717 RMF=848

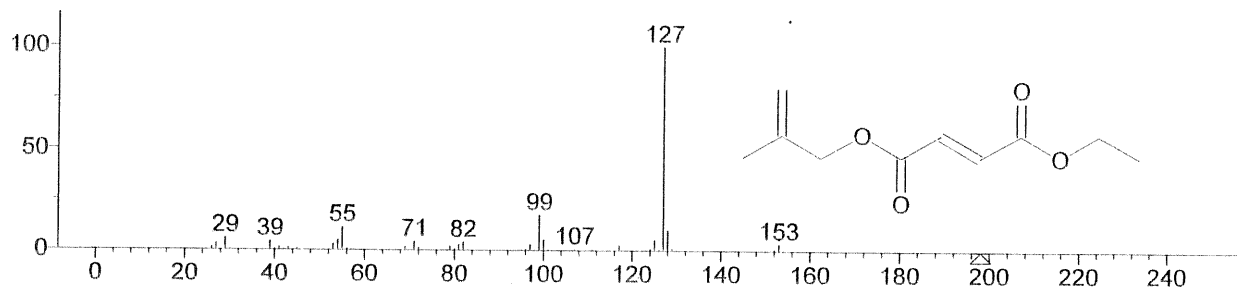

(mainlib) Fumaric acid, ethyl 2-methylallyl ester

Name: Fumaric acid, ethyl 2-methylallyl ester

Formula:  $C_{10}H_{14}O_4$

MW: 198 NIST#: 330541 ID#: 89984 DB: mainlib

Contributor: Zaikin V.G., Borisov R.S., TIPS RAS, Moscow, Russia

10 largest peaks:

|     |     |  |    |     |  |    |     |  |     |    |  |    |    |  |     |    |  |     |    |  |    |    |  |    |    |  |    |    |  |
|-----|-----|--|----|-----|--|----|-----|--|-----|----|--|----|----|--|-----|----|--|-----|----|--|----|----|--|----|----|--|----|----|--|
| 127 | 999 |  | 99 | 172 |  | 55 | 110 |  | 128 | 99 |  | 29 | 56 |  | 125 | 52 |  | 100 | 51 |  | 54 | 49 |  | 39 | 40 |  | 71 | 40 |  |
|-----|-----|--|----|-----|--|----|-----|--|-----|----|--|----|----|--|-----|----|--|-----|----|--|----|----|--|----|----|--|----|----|--|

Synonyms:

no synonyms.

Estimated non-polar retention index (n-alkane scale):

Value: 1325 iu

Confidence interval (Esters): 47(50%) 201(95%) iu

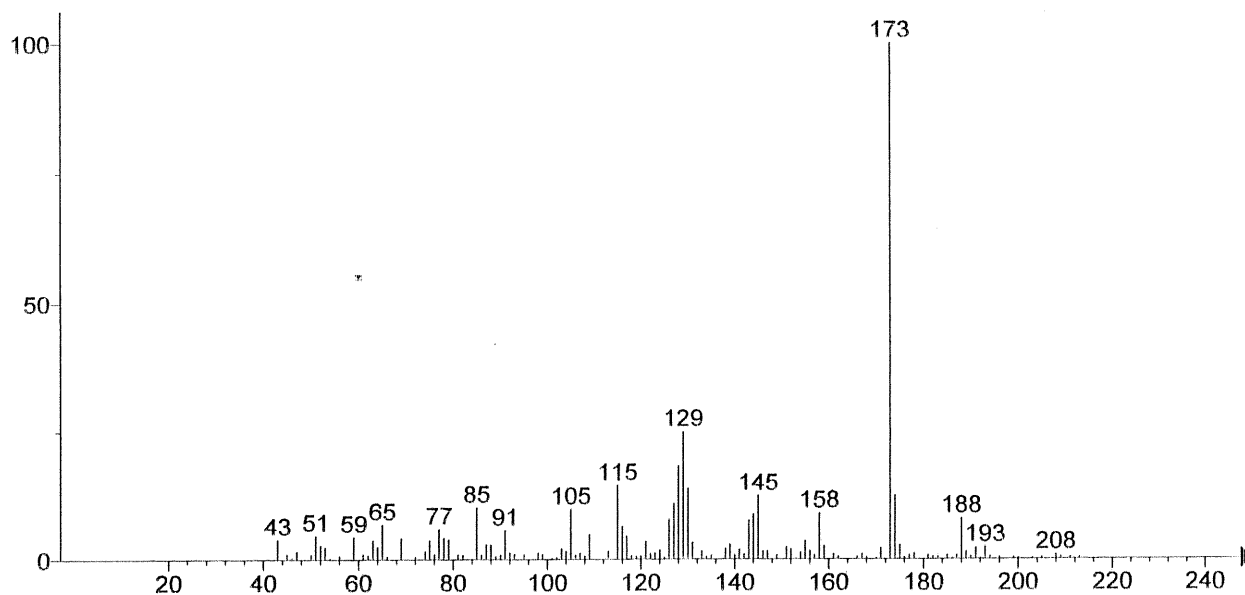

(Text File) +EI Scan (36.531 min) ALI-OLE-H7-220421-.D Subtract

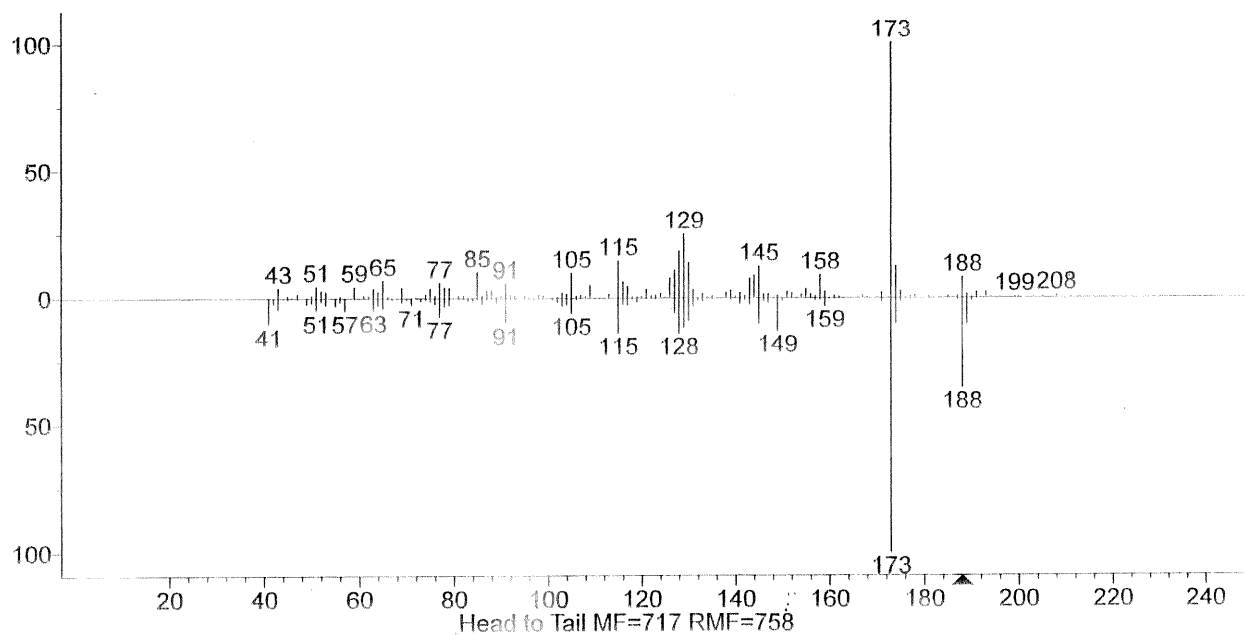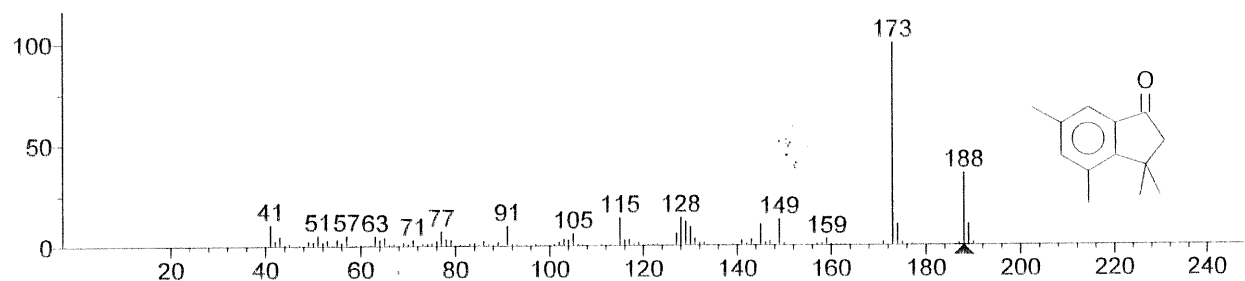

(mainlib) 1H-Inden-1-one, 2,3-dihydro-3,3,4,6-tetramethyl-

Name: 1H-Inden-1-one, 2,3-dihydro-3,3,4,6-tetramethyl-

Formula: C<sub>13</sub>H<sub>16</sub>O

MW: 188 CAS#: 55255-42-0 NIST#: 129192 ID#: 129096 DB: mainlib

Other DBs: None

Contributor: LAC, NIDDK, NIH, Bethesda, MD 20892

10 largest peaks:

173 999 | 188 353 | 128 139 | 115 138 | 149 129 | 129 119 | 41 105 | 145 105 | 174 105 | 189 105 |

Synonyms:

1.Benzo[b]dihydrofuran, 3,3,4,6-tetramethyl-

2.3,3,4,6-Tetramethyl-1-indanone #

Estimated non-polar retention index (n-alkane scale):

Value: 1579 iu

Confidence interval (Ketones): 57(50%) 246(95%) iu



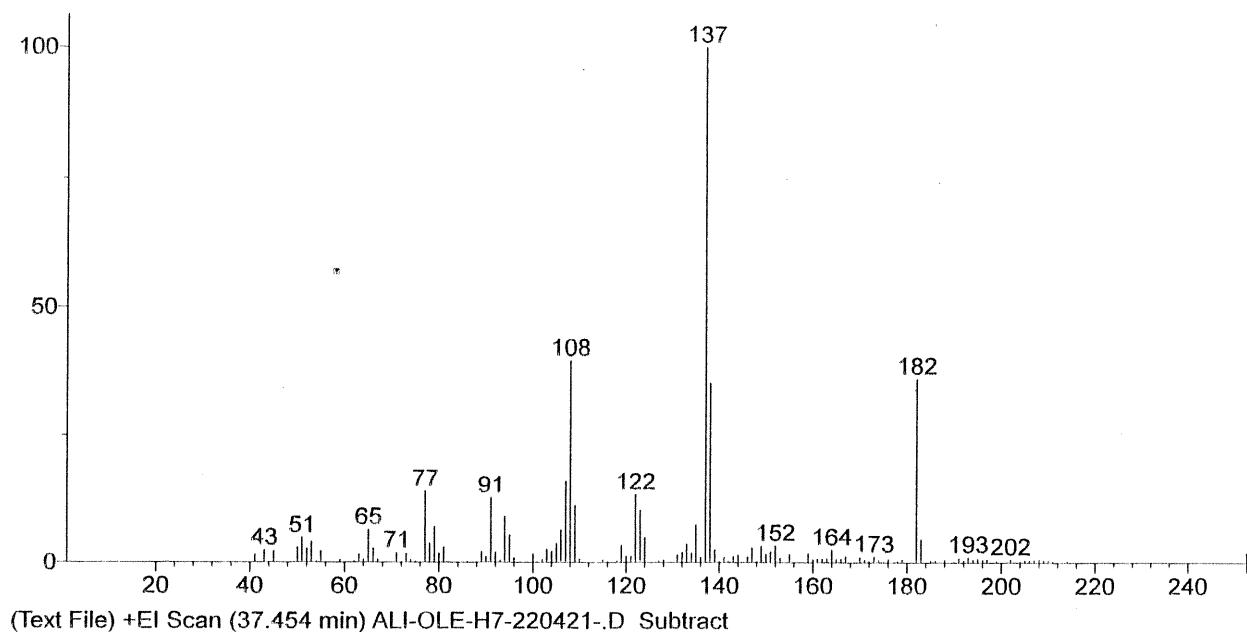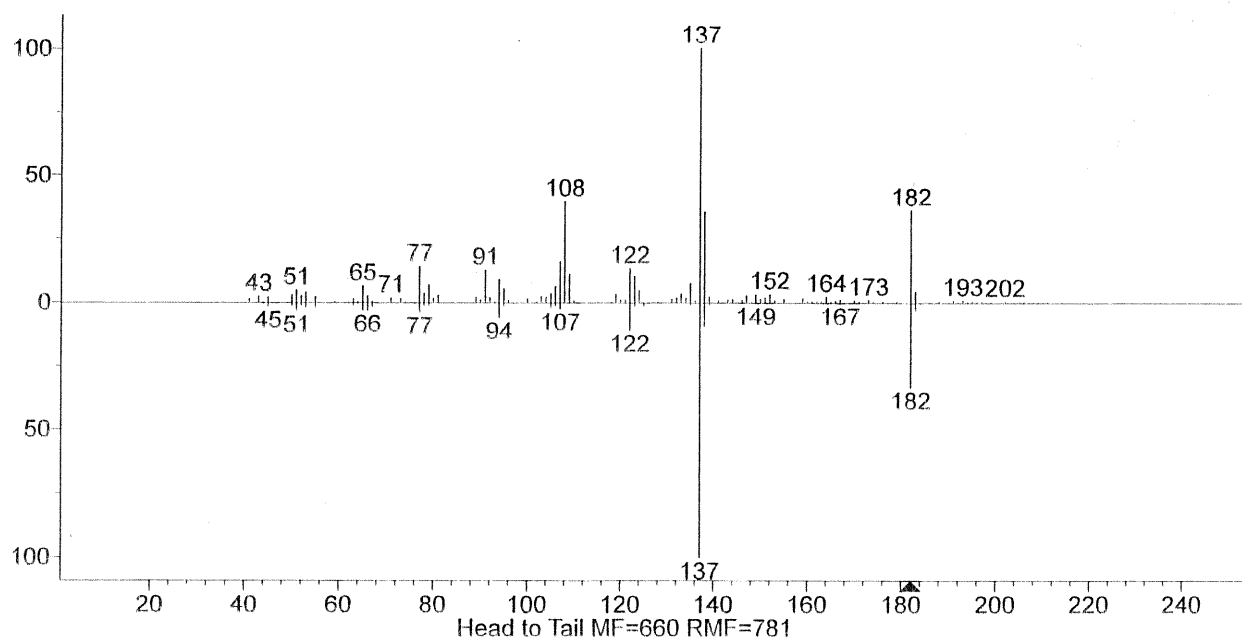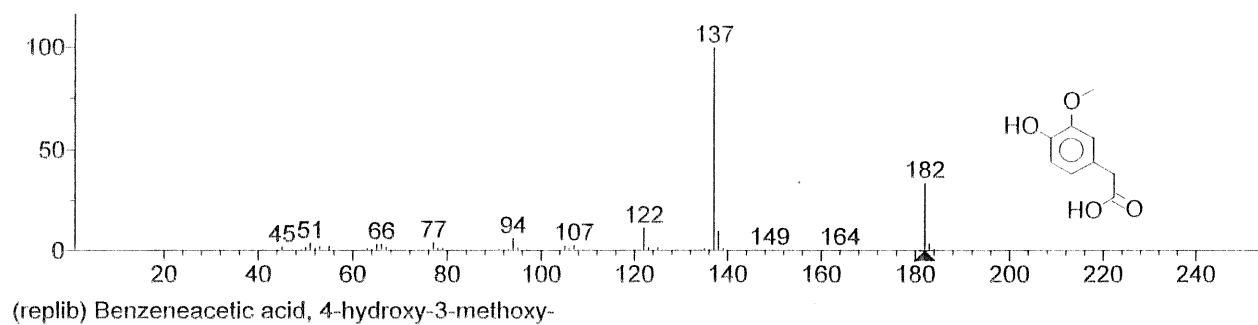

Name: Benzeneacetic acid, 4-hydroxy-3-methoxy-

Formula: C<sub>9</sub>H<sub>10</sub>O<sub>4</sub>

MW: 182 CAS#: 306-08-1 NIST#: 248367 ID#: 18756 DB: replib

Other DBs: Fine, TSCA, EPA, HODOC, NIH, EINECS

Contributor: Patti Price, Georgia Bureau of Investigation, Decatur, Georgia

10 largest peaks:

137 999 | 182 334 | 122 110 | 138 95 | 94 59 | 77 39 | 51 35 | 183 32 | 66 31 | 65 29 |

Synonyms:

1. Acetic acid, (4-hydroxy-3-methoxyphenyl)-

2. (4-Hydroxy-3-methoxyphenyl)acetic acid

3. Homovanillic acid

4. HMPA

5. HVA

6. Vanillacetic Acid

7. 3-Methoxy-4-hydroxyphenylacetic acid

8. 4-Hydroxy-3-methoxybenzeneacetic acid

9. Homovanillinic acid

10. Homovanilic acid

11. Vanilacetic acid

Estimated non-polar retention index (n-alkane scale):

Value: 1659 iu

Confidence interval (Diverse functional groups): 89(50%) 382(95%) iu

Retention index.

1. Value: 1603 iu

Column Type: Capillary

Column Class: Standard non-polar

Active Phase: HP-1

Column

Length: 50 m

Carrier Gas: He

Column Diameter: 0.2 mm

Phase Thickness: 0.5 µm

Data Type: Normal alkane

RI

Program Type: Ramp

Start T: 60 C

End T: 250 C

Heat Rate: 2 K/min

End Time: 120 min

Source: Castel,

C.; Fernandez, X.; Lizzani-Cuvelier, L.; Perichet, C.; Lavoine, S., Characterization of the Chemical Composition of a Byproduct from Siam Benzoin Gum, J. Agric. Food Chem., 54, 2006, 8848-8854.

2. Value: 1633 iu

Column

Type: Capillary

Column Class: Semi-standard non-polar

Active Phase: DB-5MS

Column Length: 30 m

Carrier

Gas: H<sub>2</sub>/N<sub>2</sub>

Column Diameter: 0.25 mm

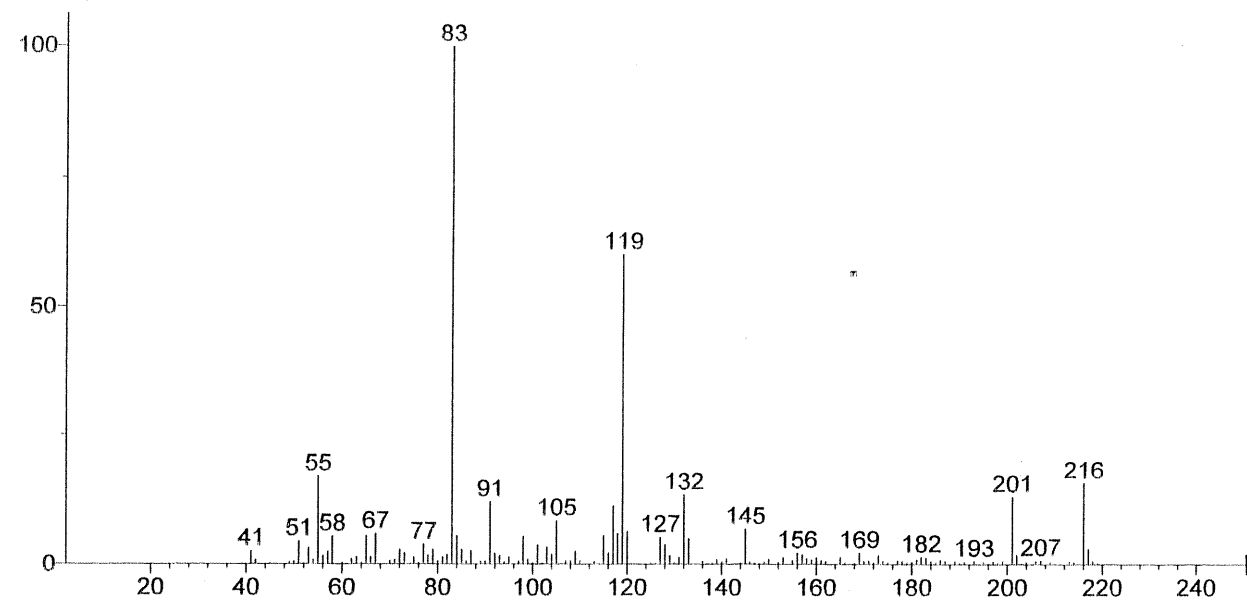

(Text File) +EI Scan (37.963 min) ALI-OLE-H7-220421-.D Subtract

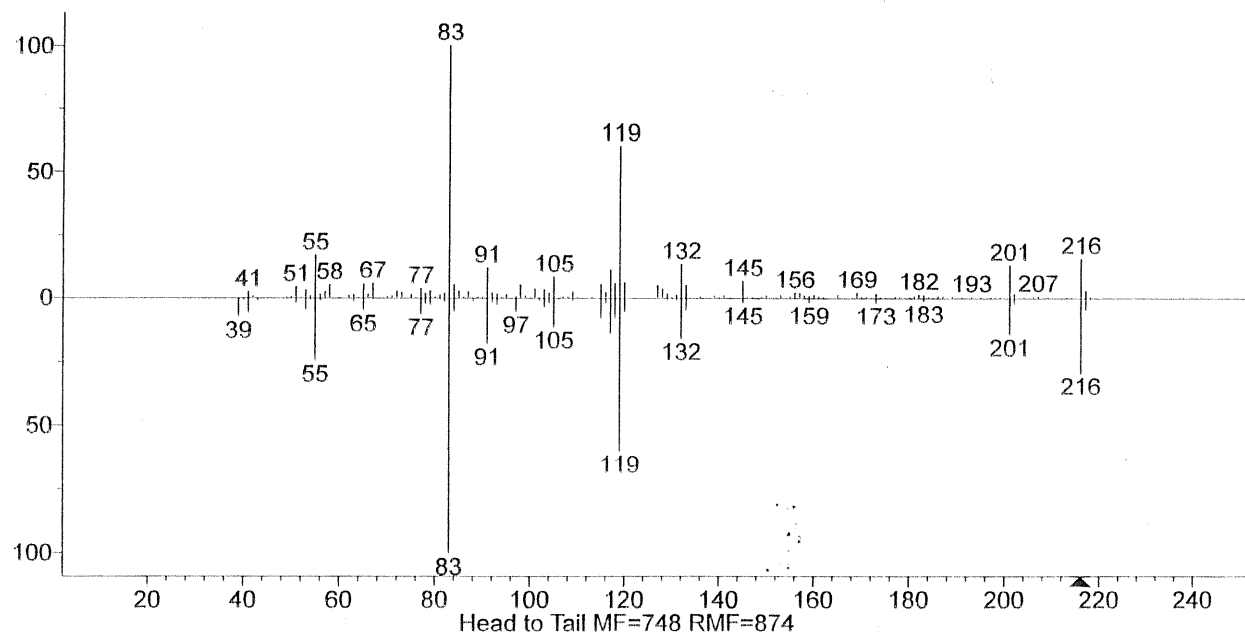

Head to Tail MF=748 RMF=874

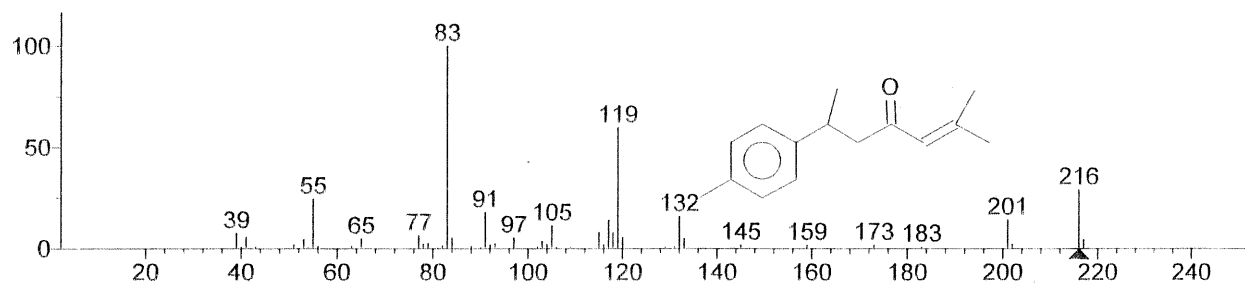

(mainlib) Ar-tumerone

Name: Ar-tumerone

Formula:  $C_{15}H_{20}O$

MW: 216 NIST#: 292710 ID#: 45357 DB: mainlib

Contributor: R.Hiserodt ET AL. J.Chrom. 740,51(1996)

10 largest peaks:

83 999 | 119 597 | 216 290 | 55 243 | 91 177 | 132 157 | 201 141 | 117 140 | 105 112 | 118 79 |

Synonyms:

no synonyms.

Estimated non-polar retention index (n-alkane scale):

Value: 1660 iu

Confidence interval (Ketones): 57(50%) 246(95%) iu

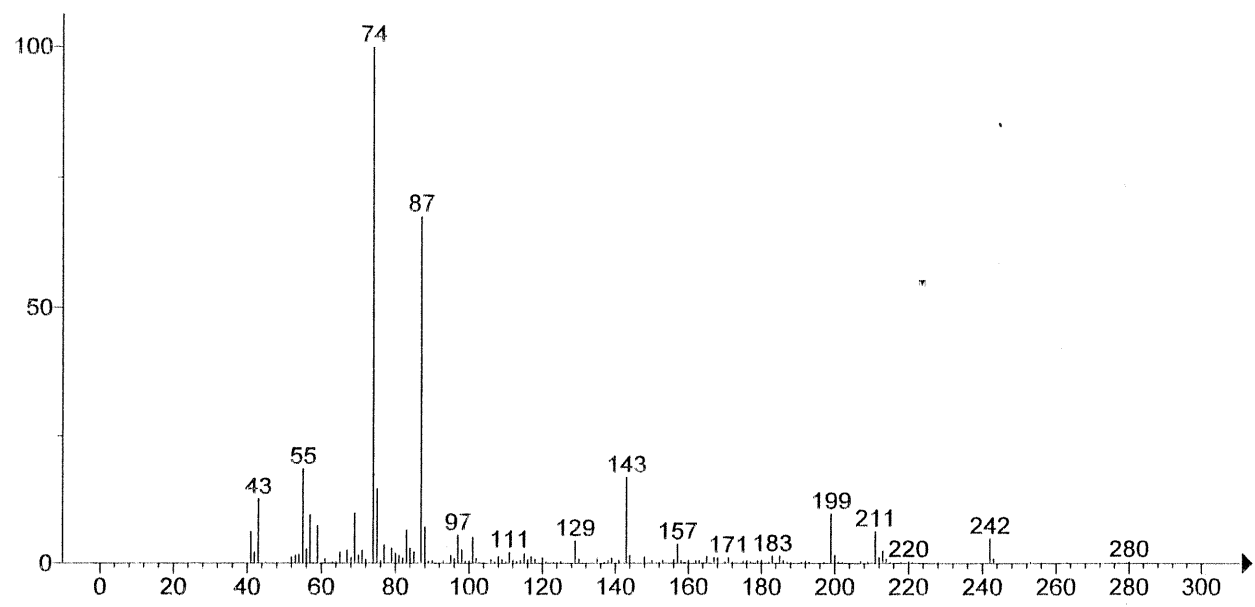

(Text File) +EI Scan (39.346 min) ALI-OLE-H7-220421-.D Subtract

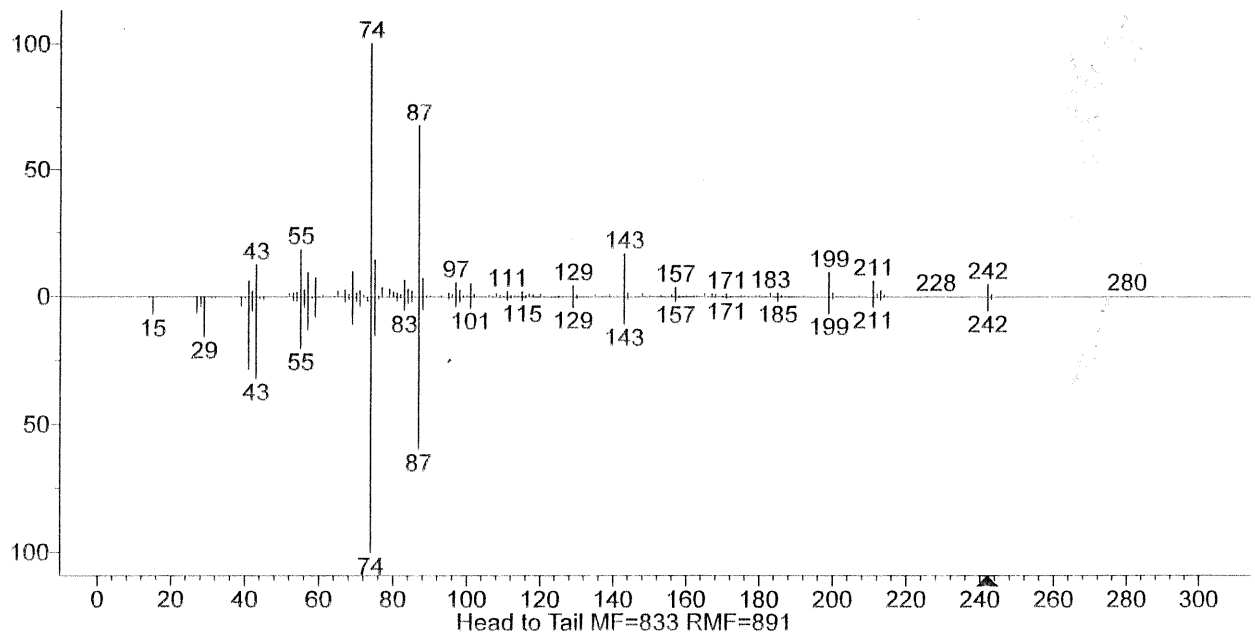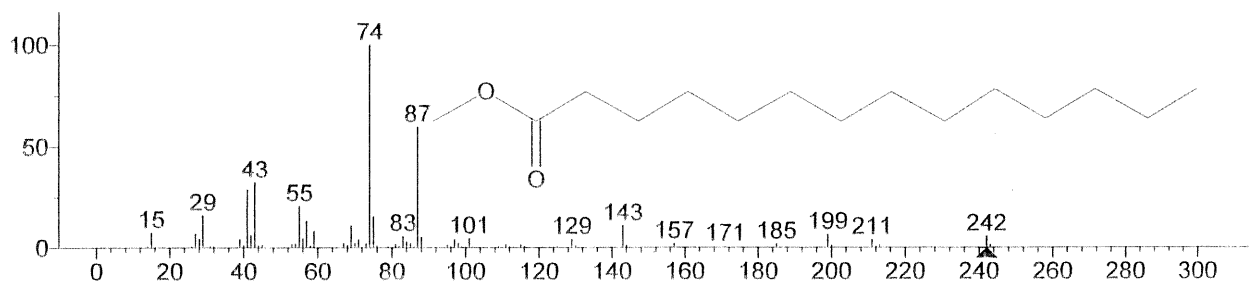

(replib) Methyl tetradecanoate

Name: Methyl tetradecanoate

Formula:  $C_{15}H_{30}O_2$

MW: 242 CAS#: 124-10-7 NIST#: 79125 ID#: 9077 DB: replib

Other DBs: Fine, TSCA, EPA, HODOC, NIH, EINECS, IRDB

Contributor: O A MAMER, MCGILL UNIVERSITY, MONTREAL, HEM. P

10 largest peaks:

74 999 | 87 595 | 43 321 | 41 286 | 55 204 | 29 158 | 75 153 | 57 131 | 69 109 | 143 107 |

Synonyms:

1. Tetradecanoic acid, methyl ester

2. Myristic acid, methyl ester

3. Metholeneat 2495

4. Methyl myristate

5. Methyl n-tetradecanoate

6. Uniphat A50

7. Emery 2214

Estimated non-polar retention index (n-alkane scale):

Value: 1680 iu

Confidence interval (Esters): 47(50%) 201(95%) iu

Retention index.

1. Value: 1713 iu

Column Type: Capillary

Column Class: Standard non-polar

Active Phase: CP Sil 5 CB

Column

Length: 60 m

Carrier Gas: He

Column Diameter: 0.32 mm

Phase Thickness: 0.25  $\mu$ m

Data Type: Linear

RI

Program Type: Ramp

Start T: 60 C

End T: 280 C

Heat Rate: 3 K/min

Start Time: 10 min

End Time: 60

min

Source: Pino, J.; Almora, K.; Marbot, R., Volatile components of papaya (*Carica papaya* L., maradol variety) fruit, *Flavour Fragr. J.*, 18, 2003, 492-496.

2. Value: 1714 iu

Column Type: Capillary

Column Class: Standard

non-polar

Active Phase: HP-1

Column Length: 30 m

Carrier Gas: He

Column Diameter: 0.25 mm

Phase

Thickness: 0.33  $\mu$ m

Data Type: Linear RI

Program Type: Ramp

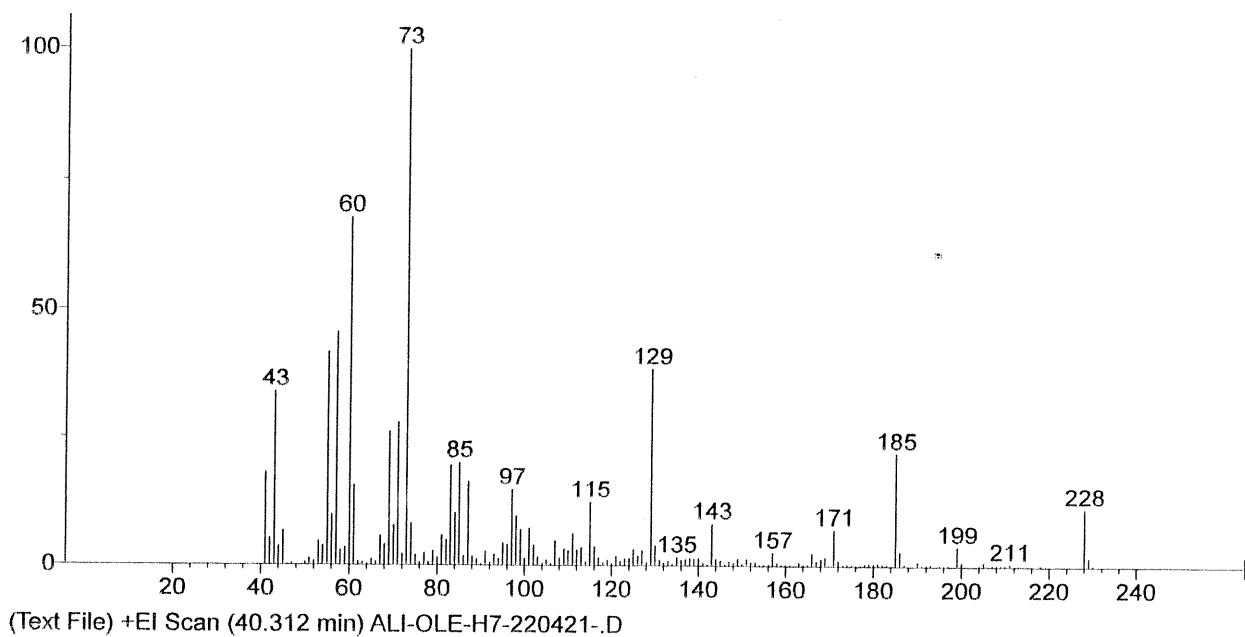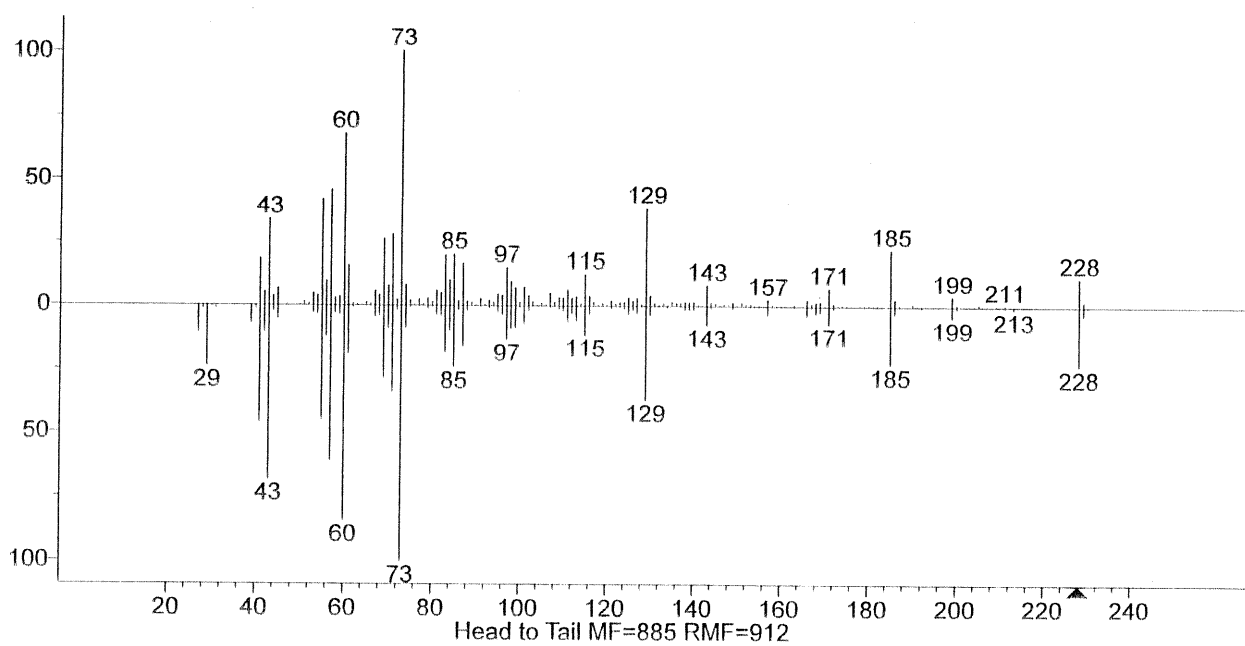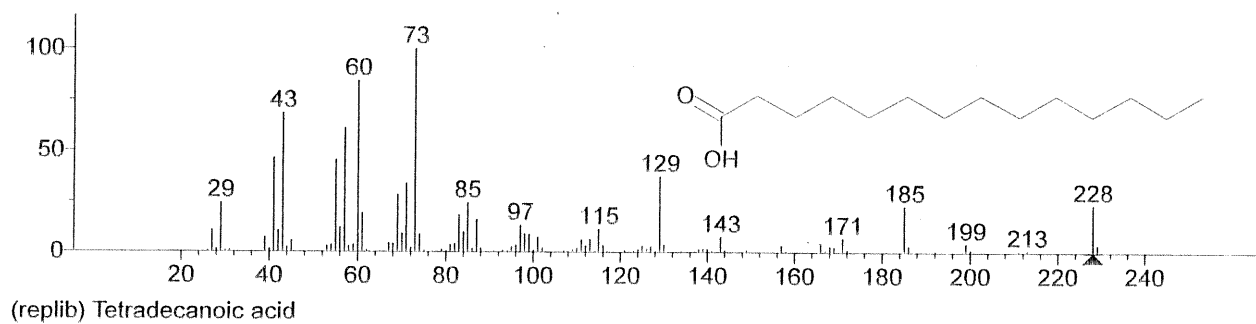

Name: Tetradecanoic acid

Formula: C<sub>14</sub>H<sub>28</sub>O<sub>2</sub>

MW: 228 CAS#: 544-63-8 NIST#: 189107 ID#: 8471 DB: replib

Other DBs: Fine, TSCA, RTECS, EPA, HODOC, NIH, EINECS, IRDB

Contributor: Chemical Concepts

10 largest peaks:

73 999 | 60 841 | 43 681 | 57 609 | 41 461 | 55 451 | 129 371 | 71 338 | 69 282 | 85 241 |

Synonyms:

1. Myristic acid
2. n-Tetradecanoic acid
3. n-Tetradecoic acid
4. Neo-Fat 14
5. Univol U 316S
6. 1-Tridecanecarboxylic acid
7. Coconut oil fatty acids
8. Crodacid
9. Emery 655
10. Hydrofol acid 1495
11. Hystrene 9014
12. n-Tetradecan-1-oic acid
13. Emery 654
14. Hystrene 9514
15. Philacid 1400
16. Prifac 2940
17. Prifrac 2940
18. Univol U 3165
19. Univol U320

Estimated non-polar retention index (n-alkane scale):

Value: 1769 iu

Confidence interval (Carboxylic acids): 51(50%) 220(95%) iu

Retention index.

1. Value: 1748 iu

Column Type: Capillary

Column Class: Standard non-polar

Active Phase: RTX-1

Column

Length: 60 m

Carrier Gas: He

Column Diameter: 0.22 mm

Phase Thickness: 0.25 µm

Data Type: Linear

RI

Program Type: Ramp

Start T: 60 C

End T: 230 C

Heat Rate: 2 K/min

End Time: 35 min

Source: Paolini, J.;

Muselli, A.; Bernardini, A.-F.; Bighelli, A.; Casanova, J.; Costa, J., Thymol derivatives from essential oil of *Doronicum corsicum* L., *Flavour Fragr. J.*, 22, 2007, 479-487.

2. Value: 1772 iu



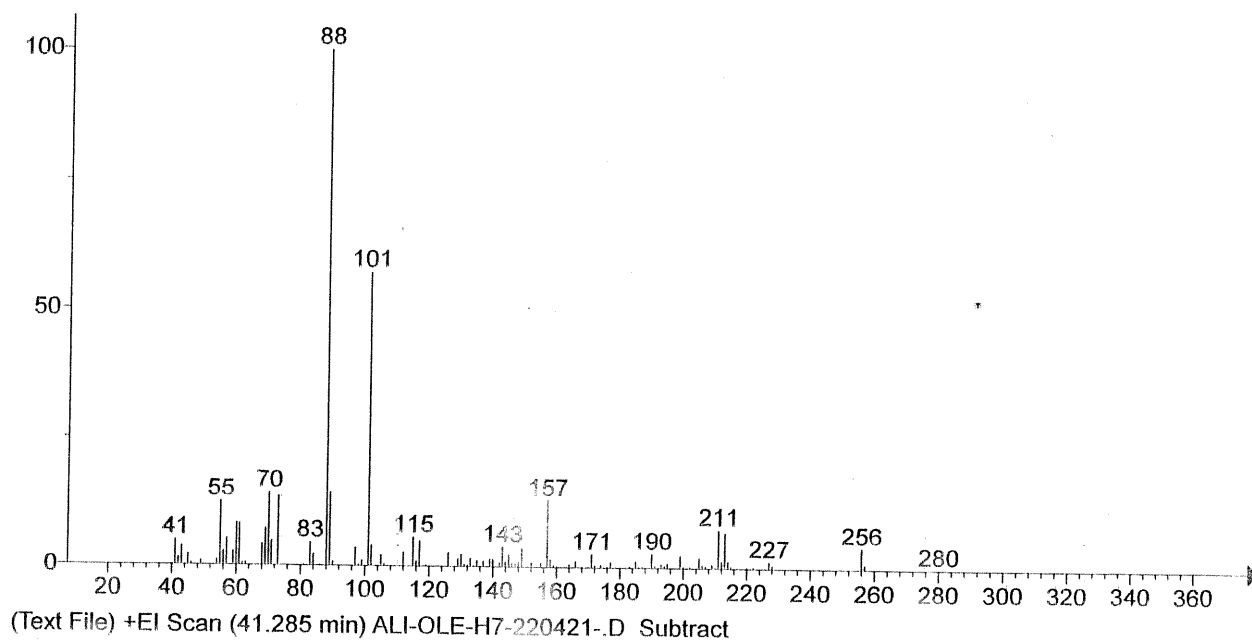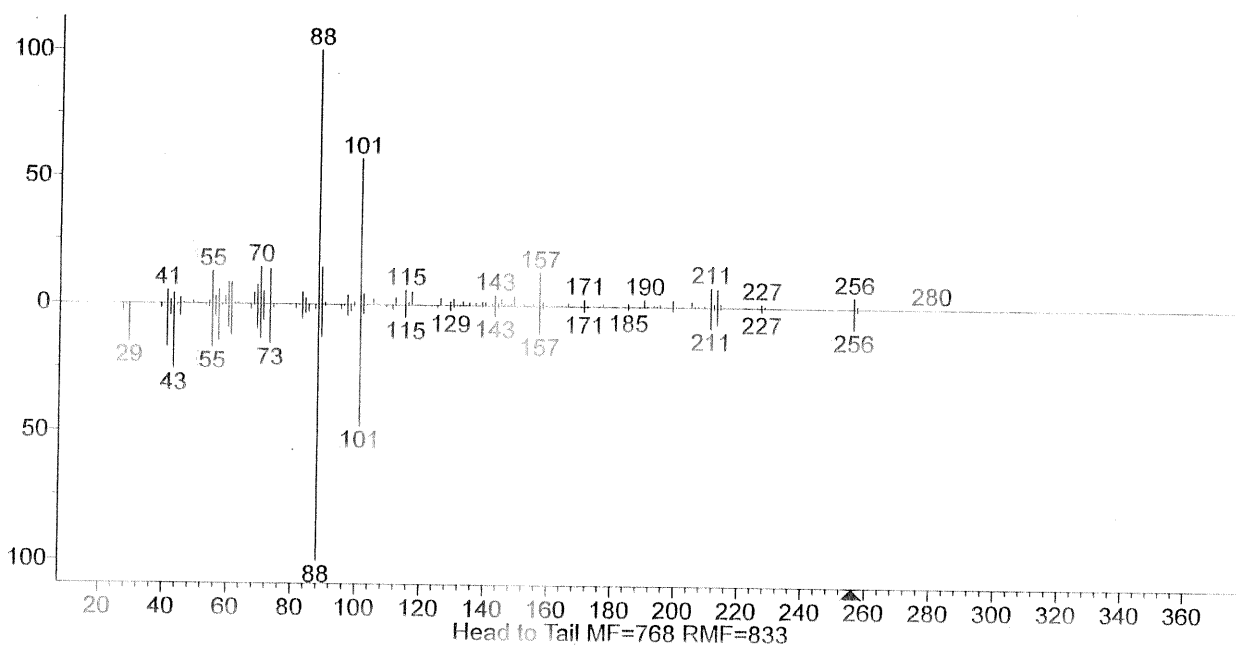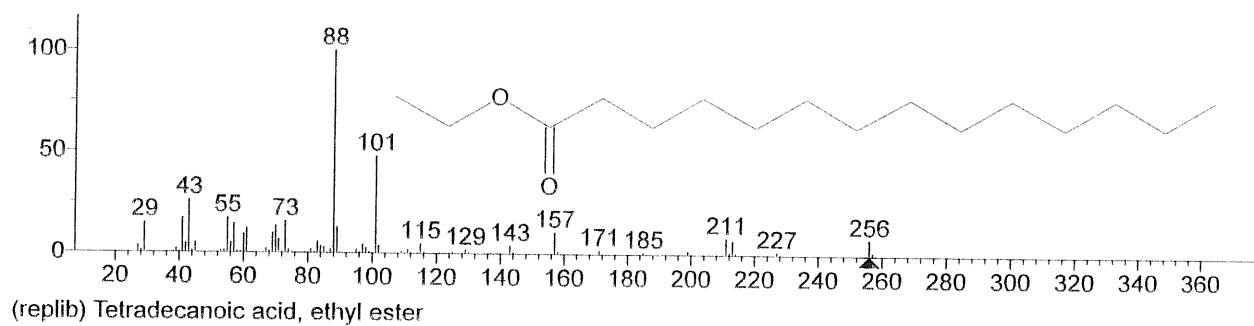

Name: Tetradecanoic acid, ethyl ester

Formula: C<sub>16</sub>H<sub>32</sub>O<sub>2</sub>

MW: 256 CAS#: 124-06-1 NIST#: 156923 ID#: 11112 DB: replib

Other DBs: Fine, TSCA, EPA, HODOC, NIH, EINECS, IRDB

Contributor: Chemical Concepts

10 largest peaks:

88 999 | 101 477 | 43 257 | 55 170 | 41 168 | 73 154 | 29 147 | 57 143 | 70 134 | 89 128 |

Synonyms:

1. Myristic acid, ethyl ester

2. Ethyl myristate

3. Ethyl tetradecanoate

4. Ethyl ester of tetradecanoic acid

5. Ethyl N-tetradecanoate

Estimated non-polar retention index (n-alkane scale):

Value: 1779 iu

Confidence interval (Esters): 47(50%) 201(95%) iu

Retention index.

1. Value: 1778 iu

Column Type: Capillary

Column Class: Standard non-polar

Active Phase: BP-1

Column

Length: 30 m

Carrier Gas: N<sub>2</sub>

Column Diameter: 0.32 mm

Phase Thickness: 0.25 µm

Data Type: Linear

RI

Program Type: Ramp

Start T: 60 C

End T: 220 C

Heat Rate: 5 K/min

End Time: 13 min

Source: Raina, V.

K.; Kumar, A.; Srivastava, S.K.; Syamsundar, K.V.; Kahol, A.P., Essential oil composition of 'kewda' (Pandanus odoratissimus) from India, Flavour Fragr. J., 19, 2004, 434-436.

2. Value: 1782 iu

Column Type:

Capillary

Column Class: Standard non-polar

Active Phase: CP Sil 5 CB

Column Length: 60 m

Carrier Gas:

He

Column Diameter: 0.32 mm

Phase Thickness: 0.25 µm

Data Type: Linear RI

Program Type: Ramp

Start T:

60 C

End T: 280 C

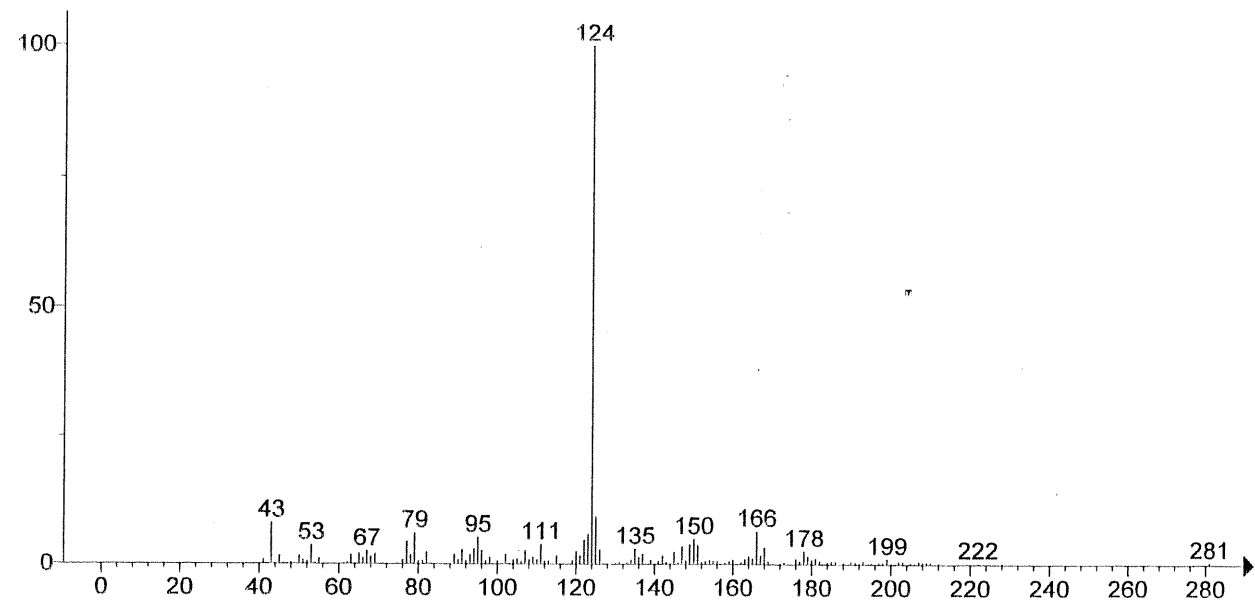

(Text File) +EI Scan (41.588 min) ALI-OLE-H7-220421-.D Subtract

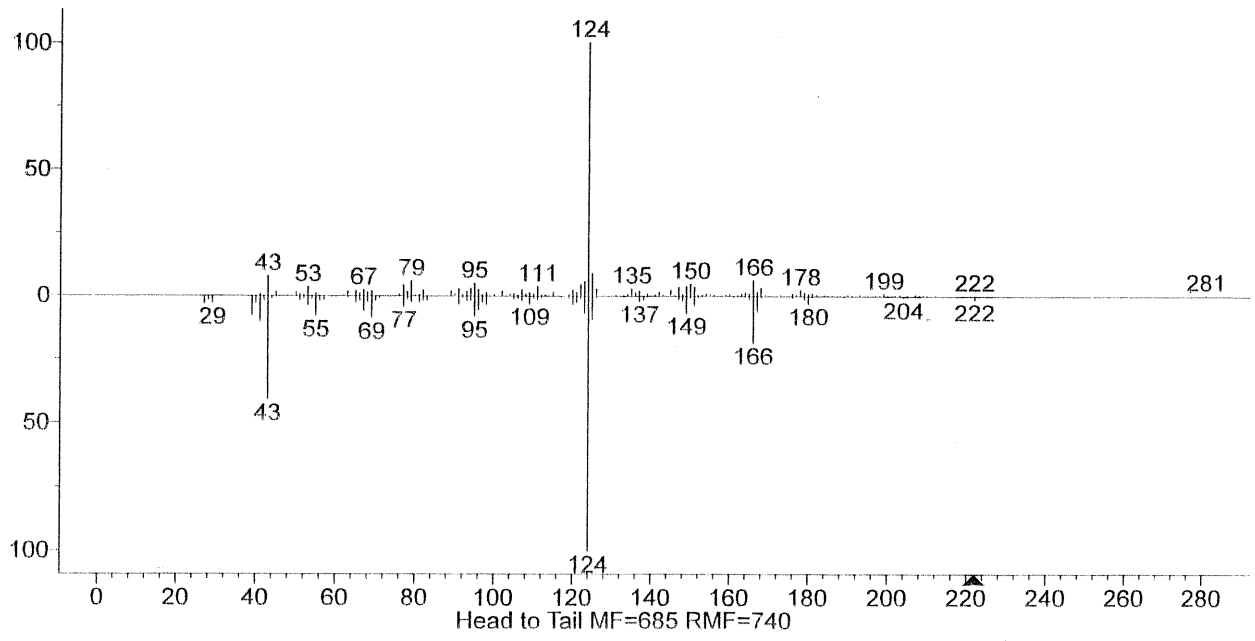

Head to Tail MF=685 RMF=740

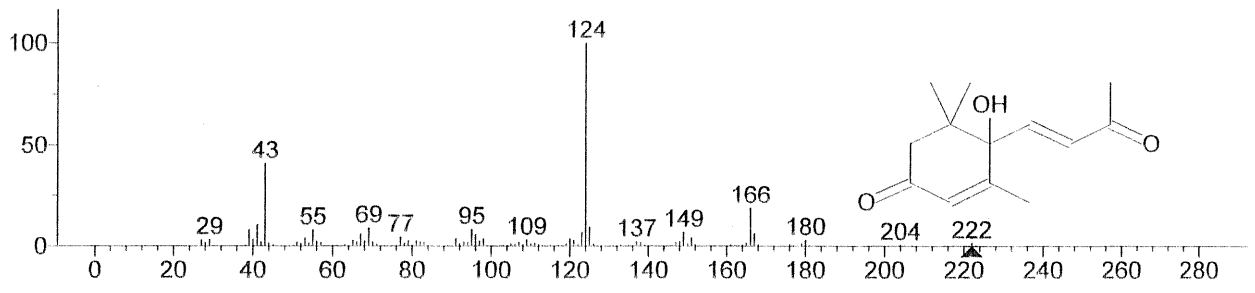

(replib) 2-Cyclohexen-1-one, 4-hydroxy-3,5,5-trimethyl-4-(3-oxo-1-butenyl)-

Name: 2-Cyclohexen-1-one, 4-hydroxy-3,5,5-trimethyl-4-(3-oxo-1-butenyl)-

Formula: C<sub>13</sub>H<sub>18</sub>O<sub>3</sub>

MW: 222 CAS#: 7070-24-8 NIST#: 188889 ID#: 17031 DB: replib

Other DBs: None

Contributor: Chemical Concepts

10 largest peaks:

124 999 | 43 408 | 166 186 | 41 105 | 125 93 | 69 88 | 95 82 | 39 80 | 55 79 | 123 68 |

Synonyms:

1 4-Hydroxy-3,5,5-trimethyl-4-[(1E)-3-oxo-1-butenyl]-2-cyclohexen-1-one #

Estimated non-polar retention index (n-alkane scale):

Value: 1751 iu

Confidence interval (Diverse functional groups): 89(50%) 382(95%) iu

Retention index.

1. Value: 1729 iu

Column Type: Capillary

Column Class: Standard non-polar

Active Phase: BP-1

Column

Length: 12 m

Carrier Gas: H<sub>2</sub>

Data Type: Linear RI

Program Type: Ramp

Start T: 40 C

End T: 240 C

Heat

Rate: 4 K/min

Start Time: 2 min

End Time: 75 min

Source: Tan, S.T.; Wilkins, A.L.; Holland, P.T.; McGhie, T.K.,

Extractives from New Zealand unifloral honeys. 2. Degraded carotenoids and other substances from heather honey, J. Agric. Food Chem., 37, 1989, 1217-1221.

2. Value: 1760 iu

Column Type: Capillary

Column Class: Standard

non-polar

Active Phase: CP Sil 5 CB

Column Length: 50 m

Carrier Gas: He

Column Diameter: 0.32 mm

Phase

Thickness: 1.2 µm

Data Type: Normal alkane RI

Program Type: Complex

Description: 36 0C ^ 20 K/min -> 85 0C

^ 1 K/min -> 145 0C ^ 3 K/min -> 250 0C

Source: Guyot-Declerck, C.; Chevance, F.; Lermusieau, G.; Collin, S.,

Optimized extraction procedure for quantifying norisoprenoids in honey and honey food products, J. Agric. Food Chem., 48, 2000, 5850-5855.

<...>

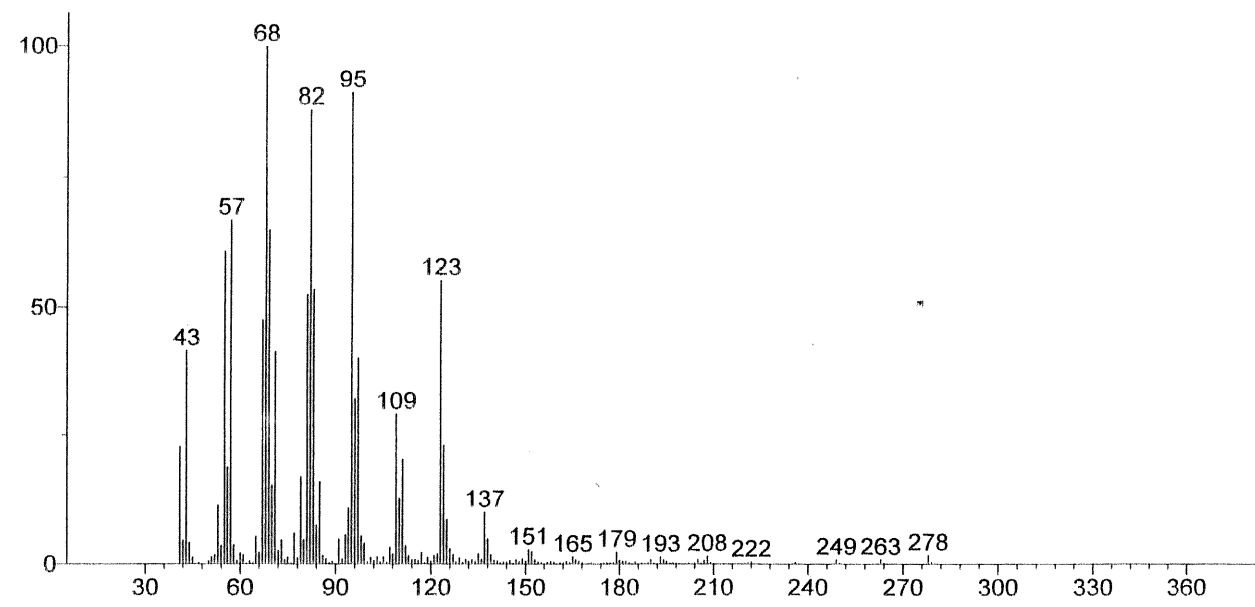

(Text File) +EI Scan (42.800 min) ALI-OLE-H7-220421-.D

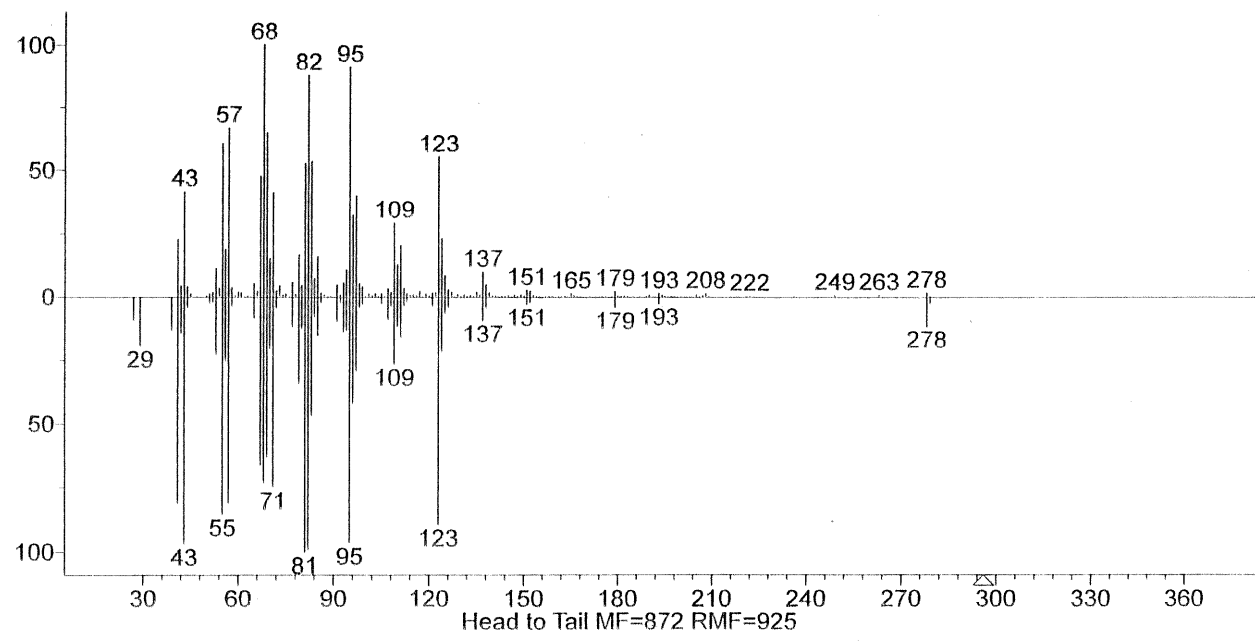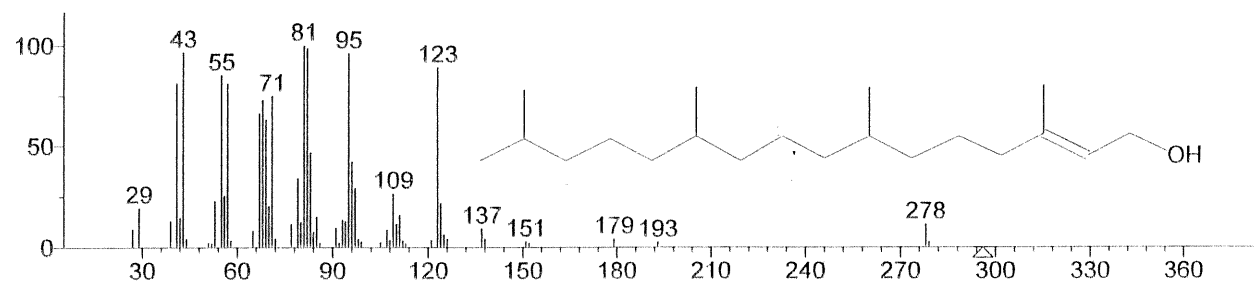

(mainlib) 3,7,11,15-Tetramethyl-2-hexadecen-1-ol

Name: 3,7,11,15-Tetramethyl-2-hexadecen-1-ol

Formula:  $C_{20}H_{40}O$

MW: 296 CAS#: 102608-53-7 NIST#: 114703 ID#: 43206 DB: mainlib

Other DBs: IRDB

Contributor: NIST Mass Spectrometry Data Center, 1990.

10 largest peaks:

81 999 | 82 986 | 43 965 | 95 962 | 123 892 | 55 852 | 41 811 | 57 811 | 71 748 | 68 728 |

Synonyms:

1.(2E)-3,7,11,15-Tetramethyl-2-hexadecen-1-ol #

Estimated non-polar retention index (n-alkane scale):

Value: 2045 iu

Confidence interval (Alcohols): 41(50%) 176(95%) iu

Retention index.

1. Value: 2119.33 iu

Column Type: Capillary

Column Class: Semi-standard non-polar

Active Phase: SE

-54

Column Length: 25 m

Column Diameter: 0.31 mm

Data Type: Linear RI

Program Type: Ramp

Start T: 35

C

End T: 230 C

Heat Rate: 4 K/min

Start Time: 3 min

End Time: 10 min

Source: Yin, W.; Xiu, Z.; Aijin, H.,

Analysis of the volatile components in troglodytes feces by capillary gas chromatography and gas chromatography/mass spectrometry, Fenxi Huaxue, 29(2), 2001, 195-198.

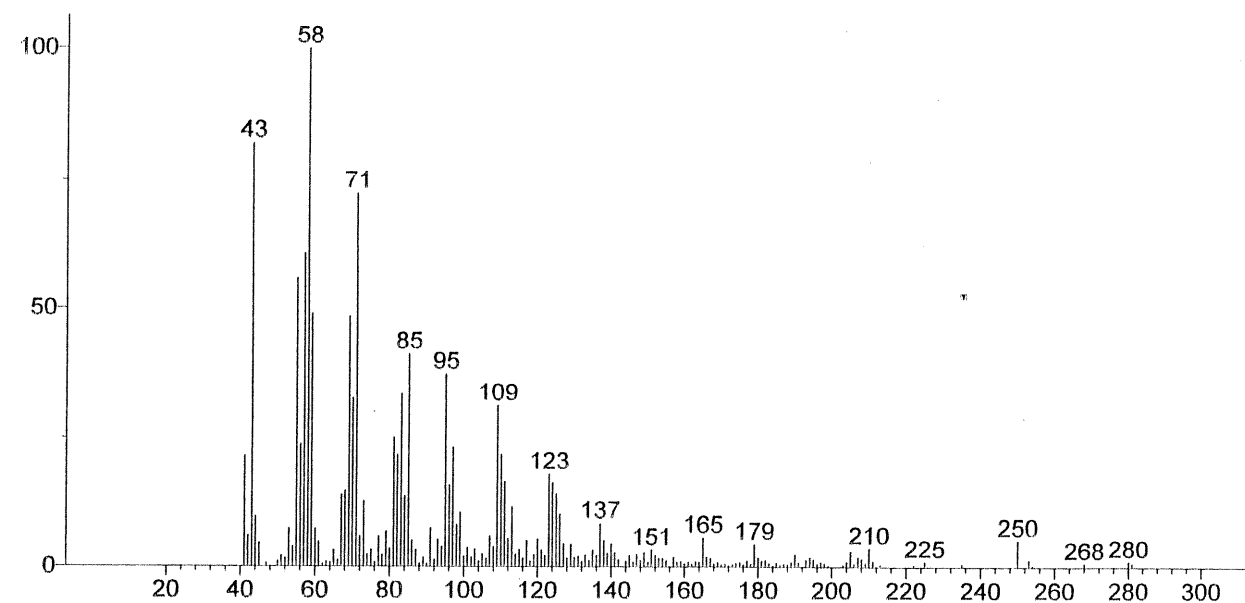

(Text File) +EI Scan (43.028 min) ALI-OLE-H7-220421-.D

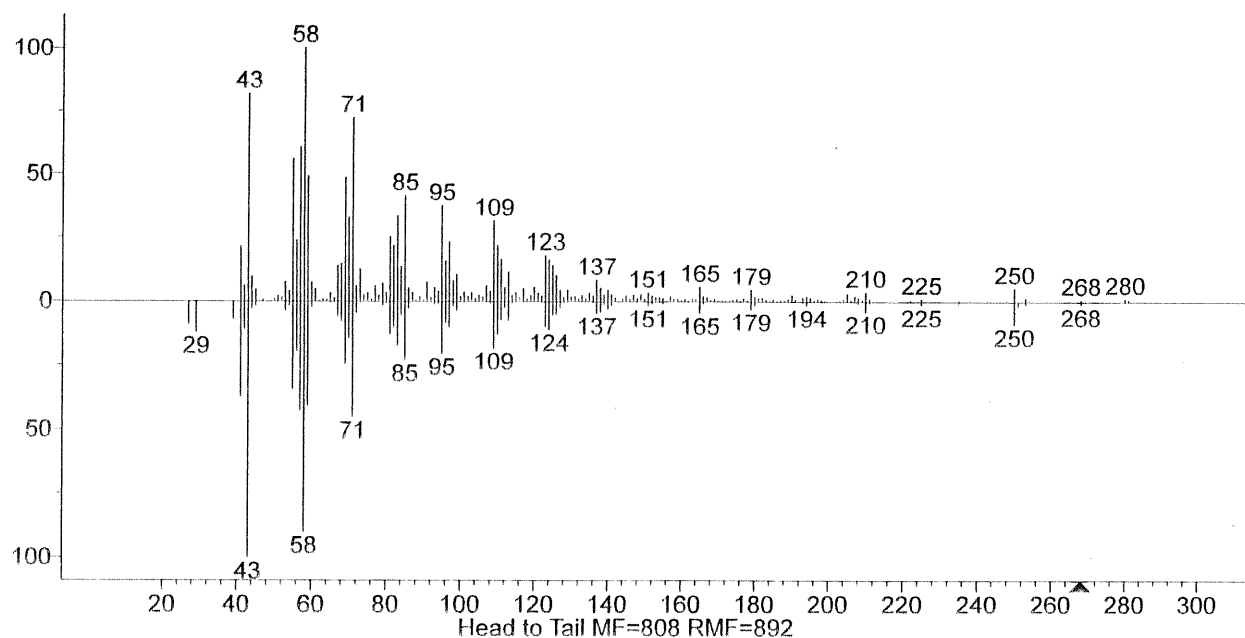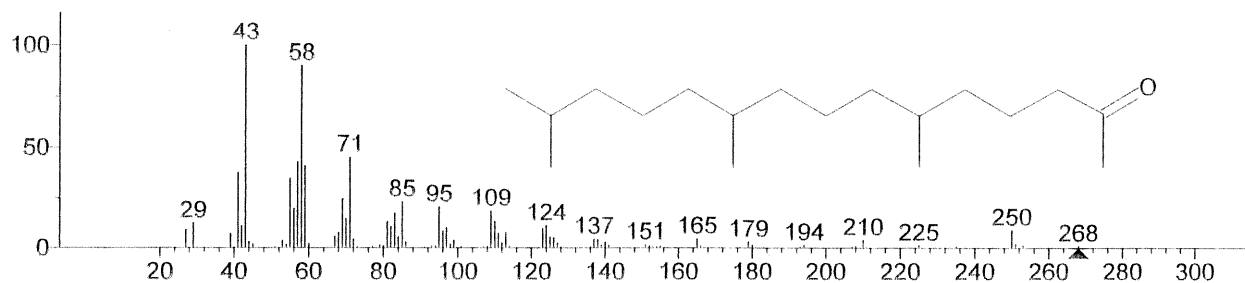

(mainlib) 2-Pentadecanone, 6,10,14-trimethyl-

65  
Name: 2-Pentadecanone, 6,10,14-trimethyl-

Formula: C<sub>18</sub>H<sub>36</sub>O

MW: 268 CAS#: 502-69-2 NIST#: 12976 ID#: 7533 DB: mainlib

Other DBs: TSCA, EINECS

Contributor: STC 0011

10 largest peaks:

43 999 | 58 898 | 71 450 | 57 426 | 59 407 | 41 373 | 55 345 | 69 245 | 85 229 | 95 203 |

Synonyms:

1.Hexahydrofarnesyl acetone

2.6,10,14-Trimethyl-2-pentadecanone

Estimated non-polar retention index (n-alkane scale):

Value: 1754 iu

Confidence interval (Ketones): 57(50%) 246(95%) iu

Retention index.

1. Value: 1838 iu

Column Type: Capillary

Column Class: Standard non-polar

Active Phase: SPB-1

Column

Length: 30 m

Carrier Gas: He

Column Diameter: 0.25 mm

Phase Thickness: 0.25 um

Data Type: Linear

RI

Program Type: Ramp

Start T: 50 C

End T: 250 C

Heat Rate: 5 K/min

Start Time: 3 min

End Time: 15

min

Source: Blagojevic, P.; Radulovic, N.; Palic, R.; Stojanovic, G., Chemical composition of the essential oils of Serbian wild-growing *Srtemisia absinthium* and *Artemisia vulgaris*, J. Agric. Food Chem., 54, 2006, 4780-4789.

2.

Value: 1858 iu

Column Type: Capillary

Column Class: Standard non-polar

Active Phase: DB-1

Column Length:

30 m

Carrier Gas: He

Column Diameter: 0.25 mm

Phase Thickness: 0.25 um

Data Type: Linear RI

Program

Type: Ramp

Start T: 60 C

End T: 240 C

Heat Rate: 4 K/min

Source: Rezazadeh, S.; Hamedani, M.P.;



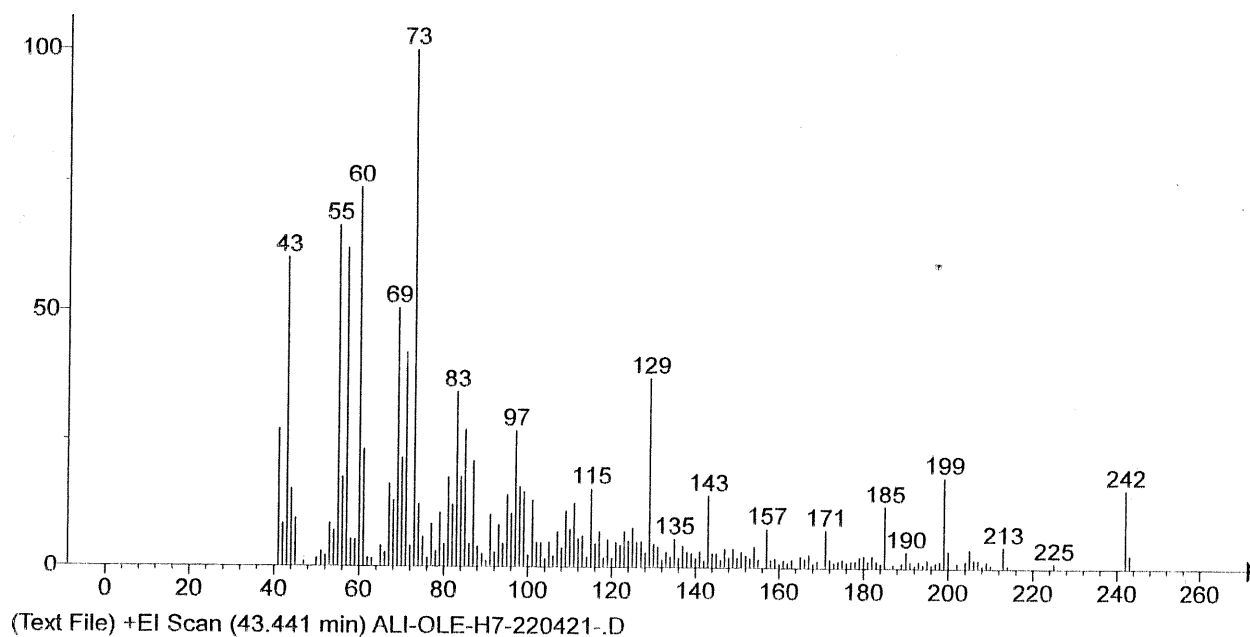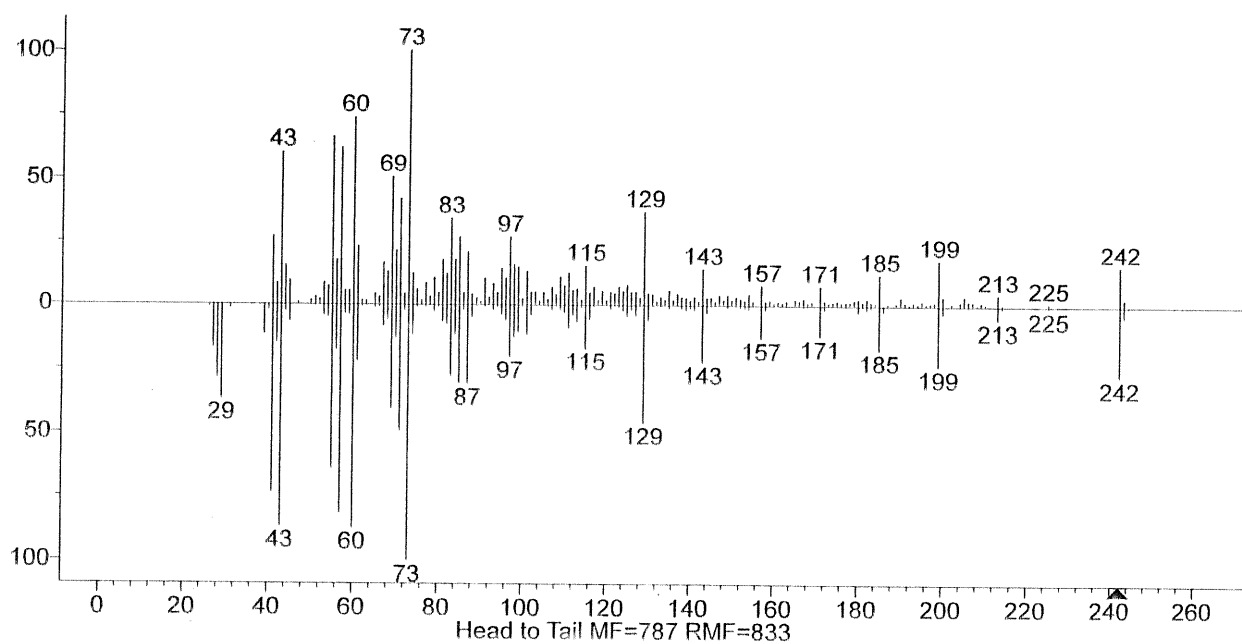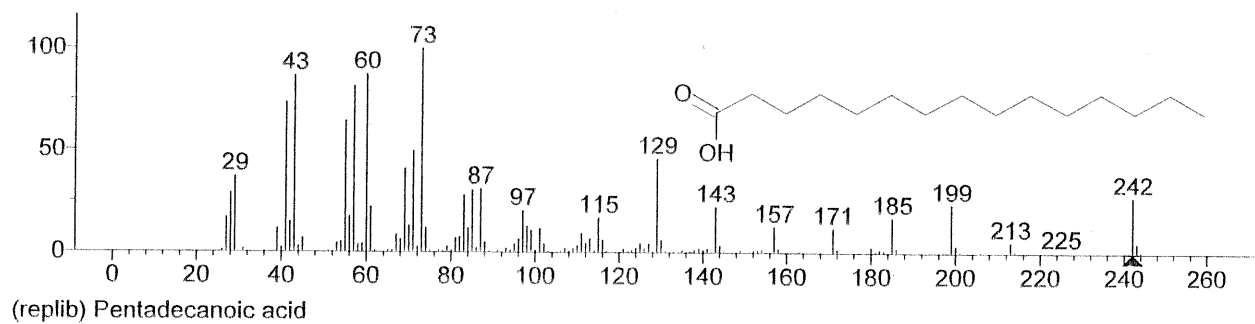

Name: Pentadecanoic acid

Formula: C<sub>15</sub>H<sub>30</sub>O<sub>2</sub>

MW: 242 CAS#: 1002-84-2 NIST#: 221146 ID#: 8469 DB: replib

Other DBs: Fine, TSCA, RTECS, HODOC, NIH, EINECS, IRDB

Contributor: Chemical Concepts

10 largest peaks:

73 999 | 60 871 | 43 865 | 57 814 | 41 734 | 55 641 | 71 493 | 129 457 | 69 405 | 29 367 |

Synonyms:

1. Pentadecylic acid

2. n-Pentadecanoic acid

3. n-Pentadecylic acid

Estimated non-polar retention index (n-alkane scale):

Value: 1869 iu

Confidence interval (Carboxylic acids): 51(50%) 220(95%) iu

Retention index.

1. Value: 1823 iu

Column Type: Capillary

Column Class: Standard non-polar

Active Phase: CP Sil 5 CB

Column

Length: 25 m

Carrier Gas: H<sub>2</sub>

Column Diameter: 0.25 mm

Data Type: Linear RI

Program Type: Ramp

Start T:

80 C

End T: 270 C

Heat Rate: 10 K/min

Source: Ziegenbein, F.C.; Hanssen, H.-P.; König, W.A., Secondary metabolites from *Ganoderma lucidum* and *Spongiporus leucomallellus*, *Phytochemistry*, 67, 2006, 202-211.

2.

Value: 1823 iu

Column Type: Capillary

Column Class: Standard non-polar

Active Phase: CP Sil 5 CB

Column

Length: 25 m

Carrier Gas: He

Column Diameter: 0.25 mm

Phase Thickness: 0.4 µm

Data Type: Linear

RI

Program Type: Ramp

Start T: 80 C

End T: 270 C

Heat Rate: 10 K/min

Source: Ziegenbein, F.C.; Hanssen, H.-P.; König, W.A., Chemical constituents of the essential oils of three wood-rotting fungi, *Flavour Fragr. J.*, 21, 2006, 813-816.

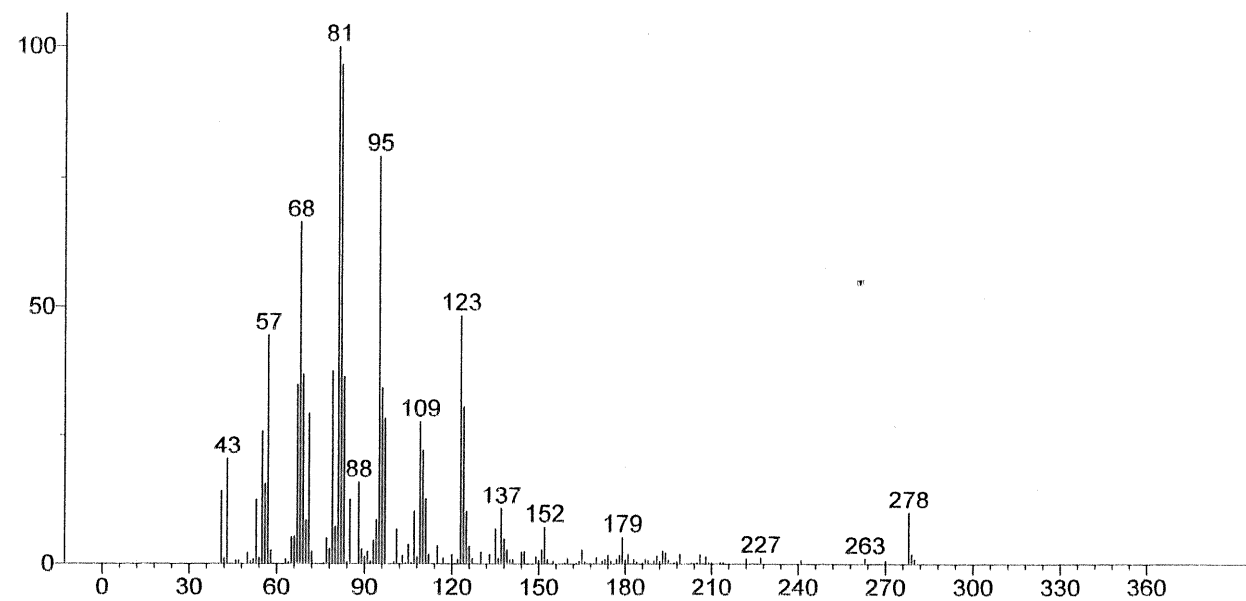

(Text File) +EI Scan (43.680 min) ALI-OLE-H7-220421-.D Subtract

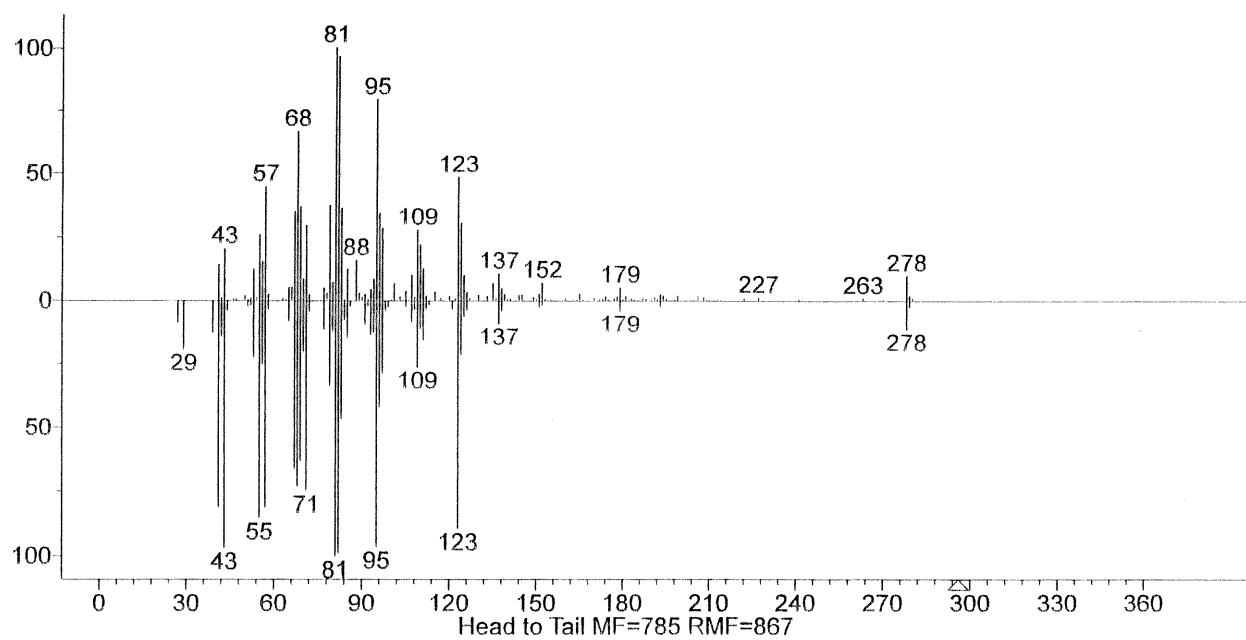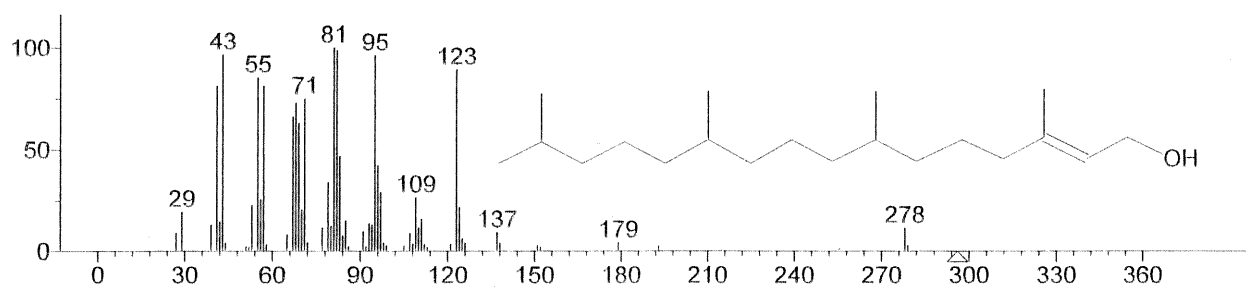

(mainlib) 3,7,11,15-Tetramethyl-2-hexadecen-1-ol

Name: 3,7,11,15-Tetramethyl-2-hexadecen-1-ol

Formula:  $C_{20}H_{40}O$

MW: 296 CAS#: 102608-53-7 NIST#: 114703 ID#: 43206 DB: mainlib

Other DBs: IRDB

Contributor: NIST Mass Spectrometry Data Center, 1990.

10 largest peaks:

81 999 | 82 986 | 43 965 | 95 962 | 123 892 | 55 852 | 41 811 | 57 811 | 71 748 | 68 728 |

Synonyms:

1.(2E)-3,7,11,15-Tetramethyl-2-hexadecen-1-ol #

Estimated non-polar retention index (n-alkane scale):

Value: 2045 iu

Confidence interval (Alcohols): 41(50%) 176(95%) iu

Retention index.

1. Value: 2119.33 iu

Column Type: Capillary

Column Class: Semi-standard non-polar

Active Phase: SE

-54

Column Length: 25 m

Column Diameter: 0.31 mm

Data Type: Linear RI

Program Type: Ramp

Start T: 35

C

End T: 230 C

Heat Rate: 4 K/min

Start Time: 3 min

End Time: 10 min

Source: Yin, W.; Xiu, Z.; Aijin, H.,

Analysis of the volatile components in troglodytes feces by capillary gas chromatography and gas chromatography/mass spectrometry, Fenxi Huaxue, 29(2), 2001, 195-198.

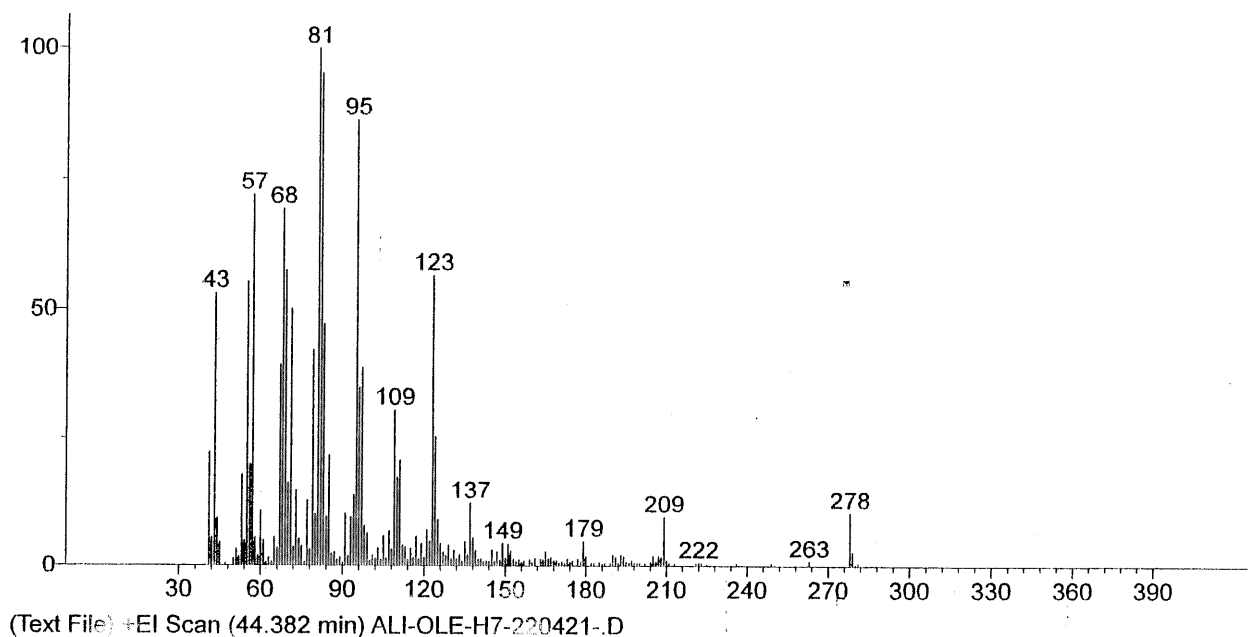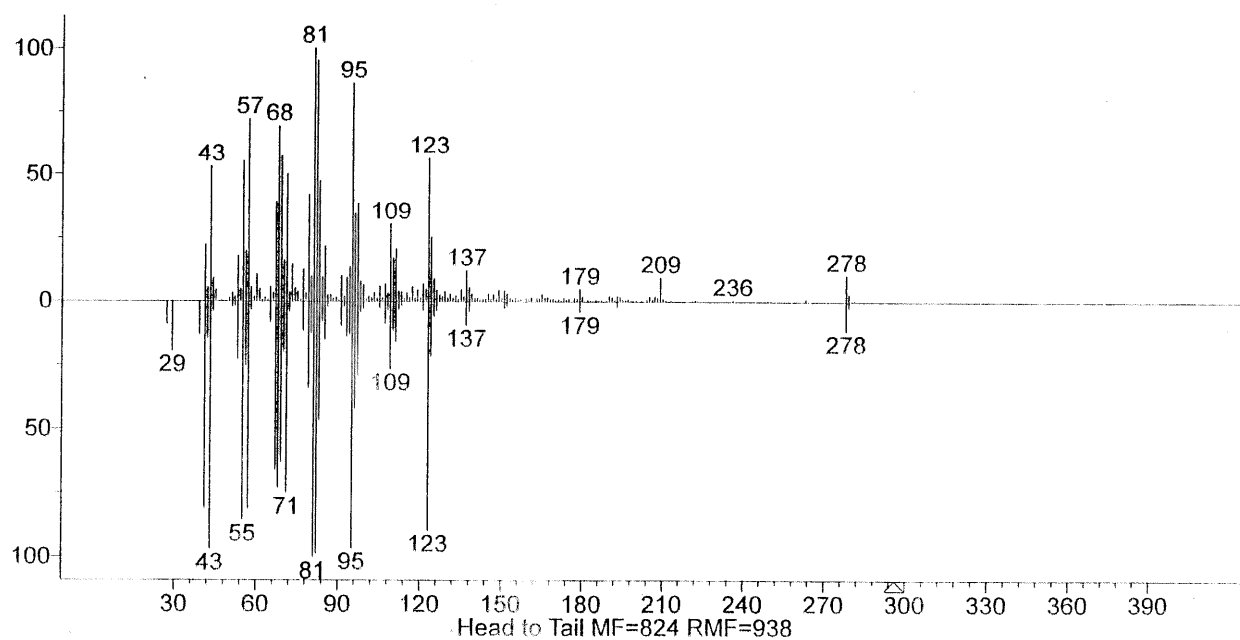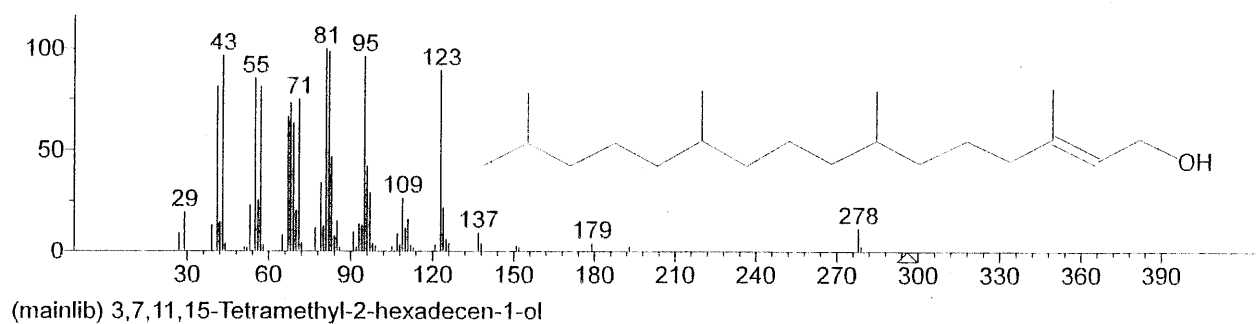

Name: 3,7,11,15-Tetramethyl-2-hexadecen-1-ol

Formula: C<sub>20</sub>H<sub>40</sub>O

MW: 296 CAS#: 102608-53-7 NIST#: 114703 ID#: 43206 DB: mainlib

Other DBs: IRDB

Contributor: NIST Mass Spectrometry Data Center, 1990.

10 largest peaks:

81 999 | 82 986 | 43 965 | 95 962 | 123 892 | 55 852 | 41 811 | 57 811 | 71 748 | 68 728 |

Synonyms:

1.(2E)-3,7,11,15-Tetramethyl-2-hexadecen-1-ol #

Estimated non-polar retention index (n-alkane scale):

Value: 2045 iu

Confidence interval (Alcohols): 41(50%) 176(95%) iu

Retention index.

1. Value: 2119.33 iu

Column Type: Capillary

Column Class: Semi-standard non-polar

Active Phase: SE

-54

Column Length: 25 m

Column Diameter: 0.31 mm

Data Type: Linear RI

Program Type: Ramp

Start T: 35

C

End T: 230 C

Heat Rate: 4 K/min

Start Time: 3 min

End Time: 10 min

Source: Yin, W.; Xiu, Z.; Aijin, H.,

Analysis of the volatile components in trogopterorum feces by capillary gas chromatography and gas chromatography/mass spectrometry, Fenxi Huaxue, 29(2), 2001, 195-198.

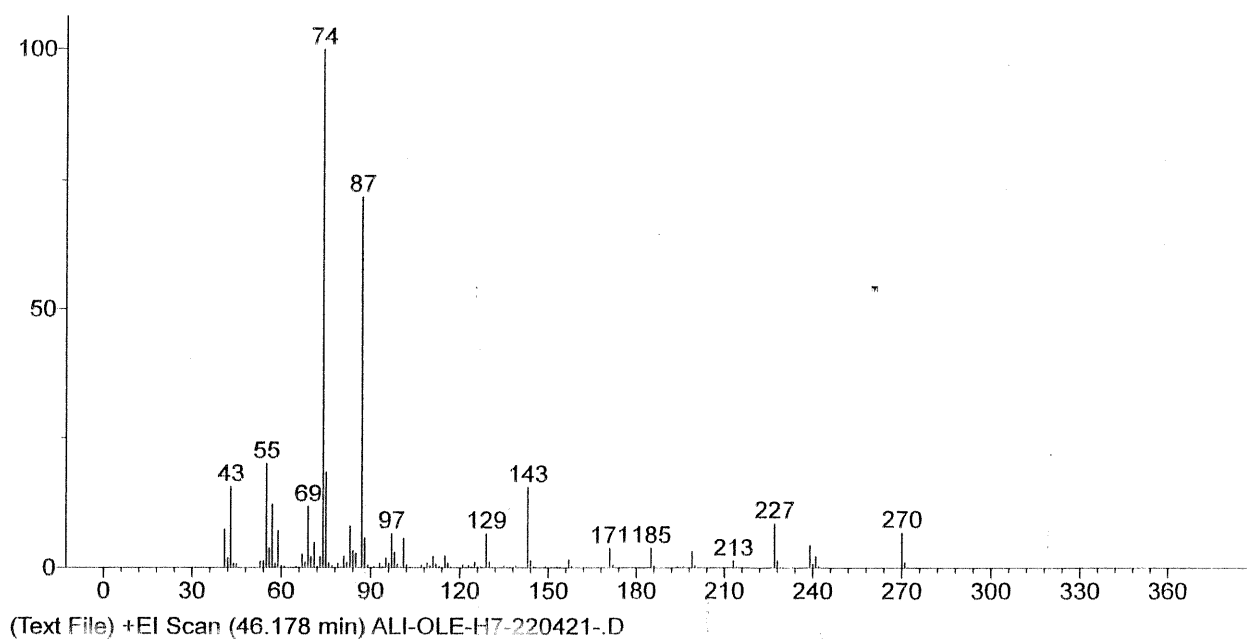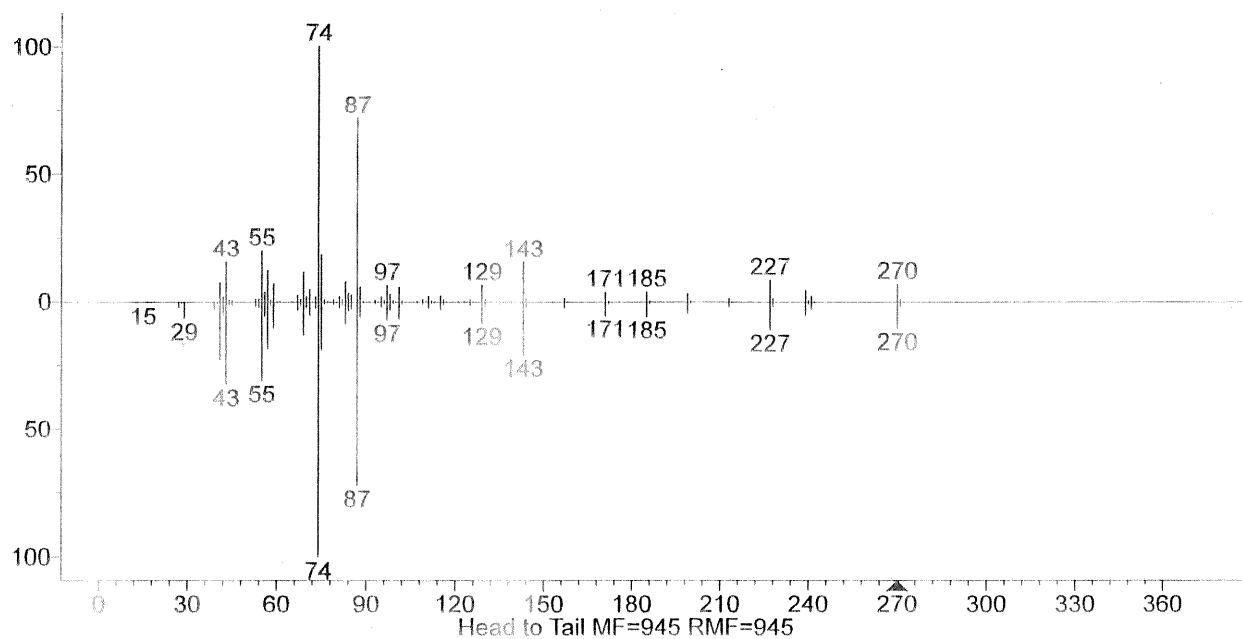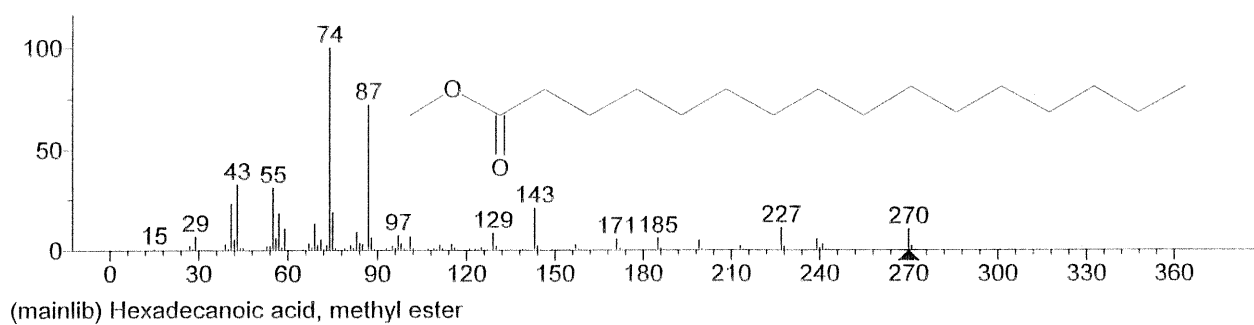

43  
Name: Hexadecanoic acid, methyl ester

Formula: C<sub>17</sub>H<sub>34</sub>O<sub>2</sub>

MW: 270 CAS#: 112-39-0 NIST#: 333716 ID#: 38248 DB: mainlib

Other DBs: Fine, TSCA, EPA, HODOC, NIH, EINECS

Contributor: NIST Mass Spectrometry Data Center

10 largest peaks:

74 999 | 87 720 | 43 325 | 55 310 | 41 228 | 143 208 | 75 188 | 57 183 | 69 132 | 227 110 |

Synonyms:

1. Palmitic acid, methyl ester

2. n-Hexadecanoic acid methyl ester

3. Metholene 2216

4. Methyl hexadecanoate

5. Methyl n-hexadecanoate

6. Methyl palmitate

7. Uniphat A60

8. Emery 2216

9. Radia 7120

Estimated non-polar retention index (n-alkane scale):

Value: 1878 iu

Confidence interval (Esters): 47(50%) 201(95%) iu

Retention index.

1. Value: 1908 iu

Column Type: Capillary

Column Class: Standard non-polar

Active Phase: SPB-1

Column

Length: 30 m

Carrier Gas: He

Column Diameter: 0.25 mm

Phase Thickness: 0.25 µm

Data Type: Linear

RI

Program Type: Ramp

Start T: 50 C

End T: 250 C

Heat Rate: 5 K/min

Start Time: 3 min

End Time: 15

min

Source: Blagojevic, P.; Radulovic, N.; Palic, R.; Stojanovic, G., Chemical composition of the essential oils of Serbian wild-growing *Srtemisia absinthium* and *Artemisia vulgaris*, J. Agric. Food Chem., 54, 2006, 4780-4789.

2.

Value: 1909 iu

Column Type: Capillary

Column Class: Standard non-polar

Active Phase: SPB-1

Column Length:

30 m

Carrier Gas: He

Column Diameter: 0.25 mm

Phase Thickness: 0.25 µm



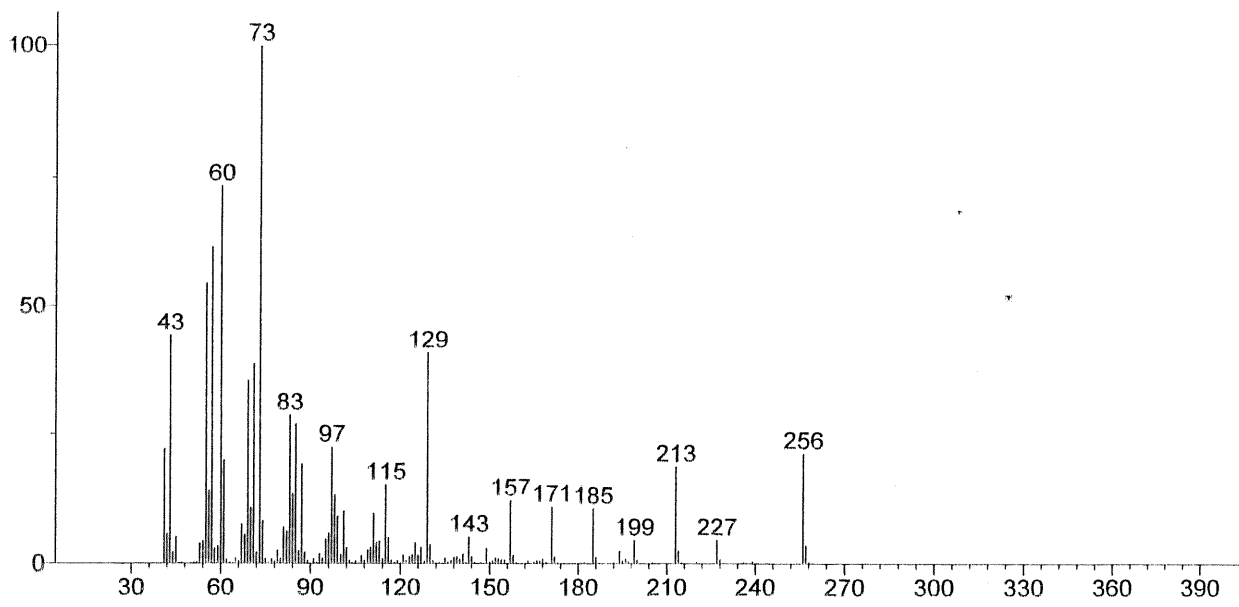

(Text File) +EI Scan (48.153 min) ALI-OLE-H7-220421-.D

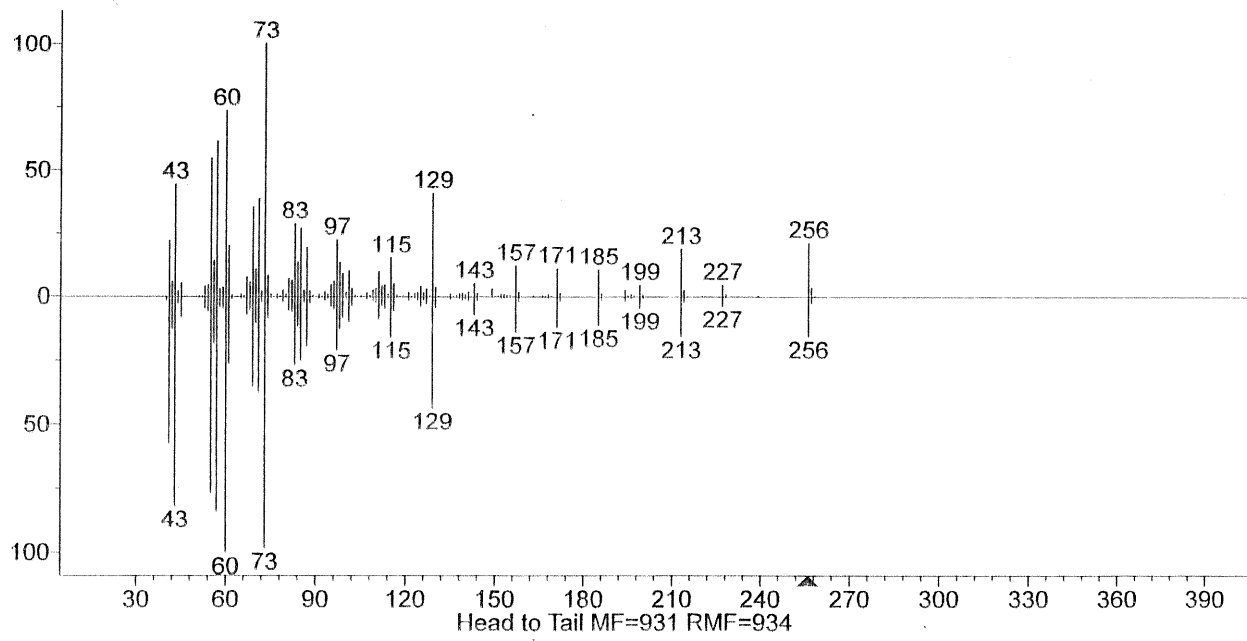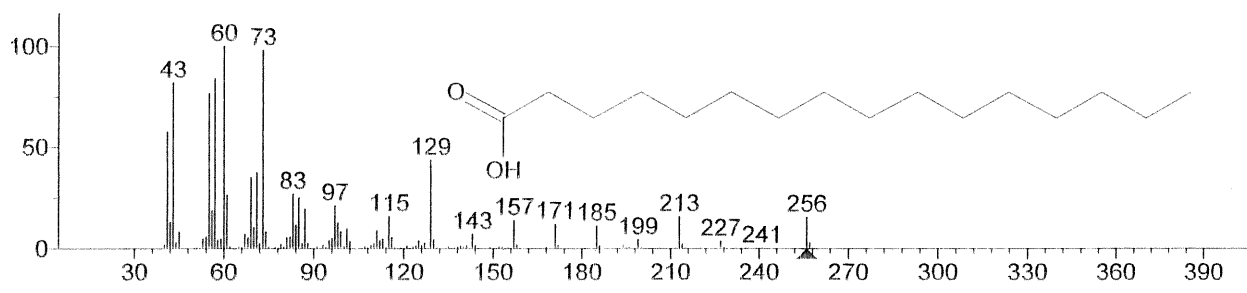

(replib) n-Hexadecanoic acid

Name: n-Hexadecanoic acid

Formula: C<sub>16</sub>H<sub>32</sub>O<sub>2</sub>

MW: 256 CAS#: 57-10-3 NIST#: 335494 ID#: 6723 DB: replib

Other DBs: Fine, TSCA, RTECS, EPA, HODOC, NIH, EINECS, IRDB

Contributor: Drug Lab

10 largest peaks:

60 999 | 73 980 | 57 840 | 43 817 | 55 767 | 41 574 | 129 435 | 71 373 | 69 351 | 83 267 |

Synonyms:

- 1.Hexadecanoic acid
- 2.n-Hexadecoic acid
- 3.Palmitic acid
- 4.Pentadecanecarboxylic acid
- 5.1-Pentadecanecarboxylic acid
- 6.Cetylic acid
- 7.Emersol 140
- 8.Emersol 143
- 9.Hexadecylic acid
- 10.Hydrofol
- 11.Hystrene 8016
- 12.Hystrene 9016
- 13.Industrene 4516
- 14.Prifrac 2960
- 15.Glycon P-45
- 16.Prifac 2960
- 17.Univol U332

Estimated non-polar retention index (n-alkane scale):

Value: 1968 iu

Confidence interval (Carboxylic acids): 51(50%) 220(95%) iu

Retention index.

1. Value: 1942 iu

Column Type: Capillary

Column Class: Standard non-polar

Active Phase: RTX-1

Column

Length: 60 m

Carrier Gas: He

Column Diameter: 0.22 mm

Phase Thickness: 0.25 um

Data Type: Linear

RI

Program Type: Ramp

Start T: 60 C

End T: 230 C

Heat Rate: 2 K/min

End Time: 35 min

Source: Paolini, J.;

Muselli, A.; Bernardini, A.-F.; Bighelli, A.; Casanova, J.; Costa, J., Thymol derivatives from essential oil of *Doronicum corsicum* L., *Flavour Fragr. J.*, 22, 2007, 479-487.

2. Value: 1972 iu

Column Type: Capillary

Column

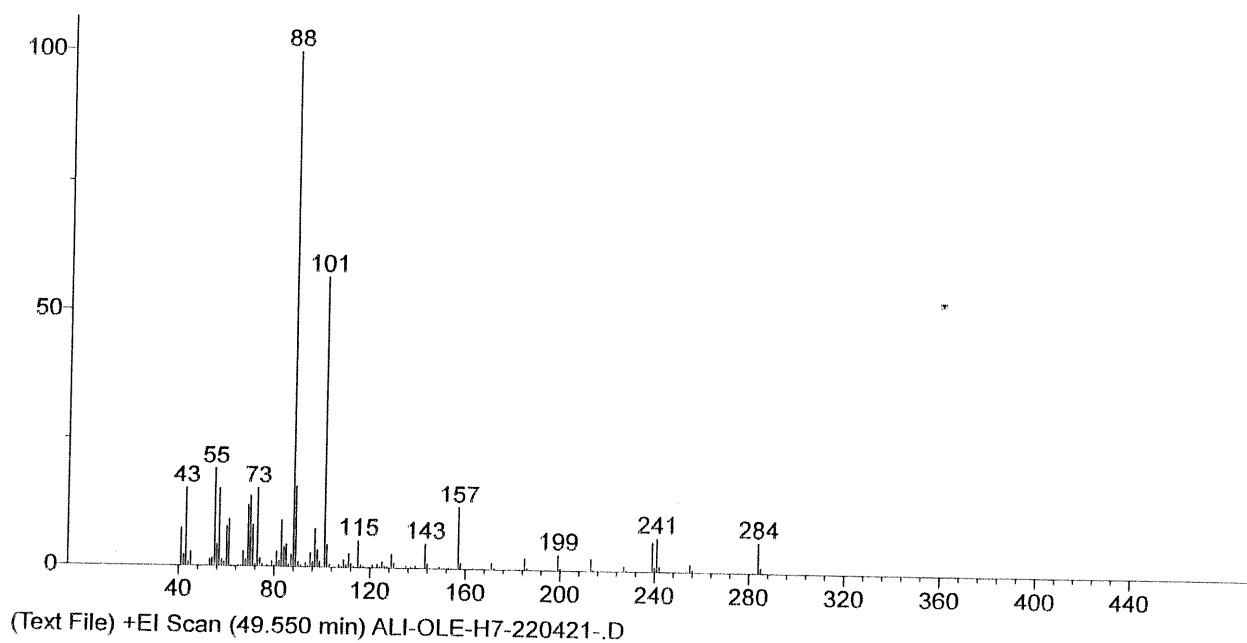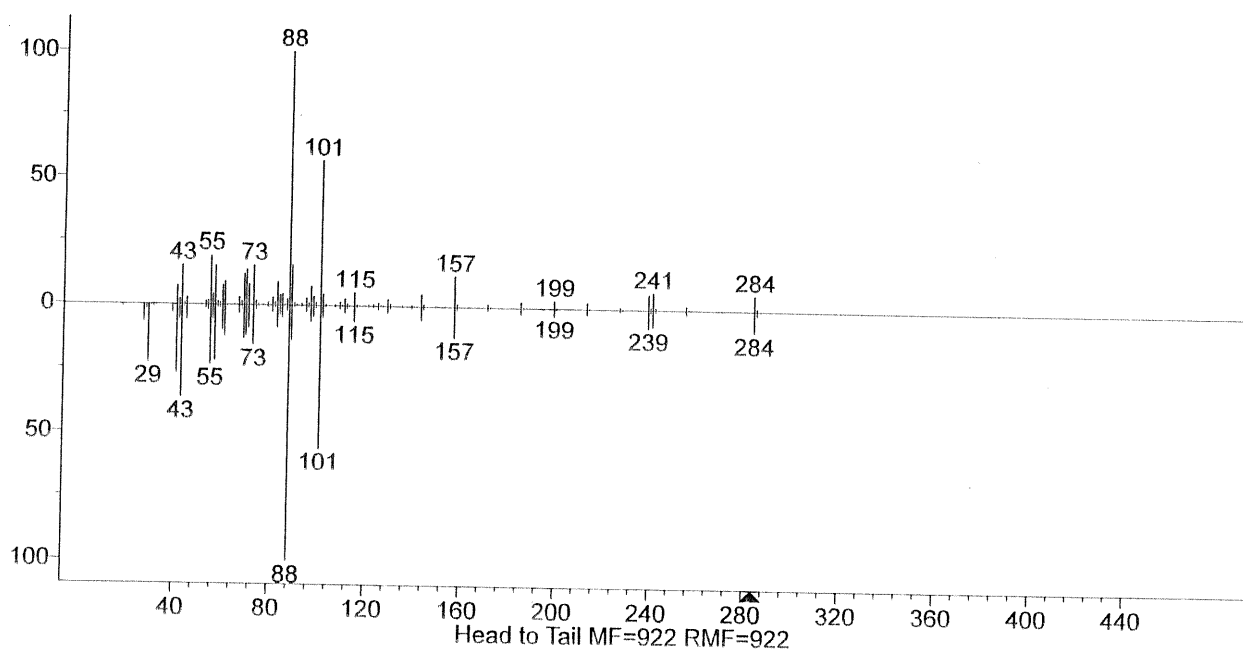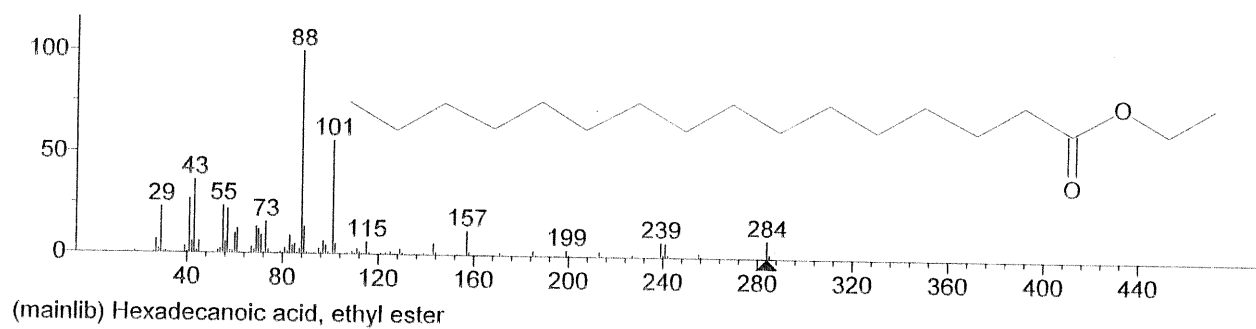

Name: Hexadecanoic acid, ethyl ester

Formula:  $C_{18}H_{36}O_2$

MW: 284 CAS#: 628-97-7 NIST#: 233204 ID#: 49485 DB: mainlib

Other DBs: Fine, TSCA, EPA, HODOC, NIH, EINECS, IRDB

Contributor: Japan AIST/NIMC Database- Spectrum MS-NW-5396

10 largest peaks:

88 999 | 101 559 | 43 362 | 41 268 | 55 233 | 29 227 | 57 217 | 73 156 | 89 136 | 69 132 |

Synonyms:

1. Palmitic acid, ethyl ester

2. Ethyl hexadecanoate

3. Ethyl palmitate

Estimated non-polar retention index (n-alkane scale):

Value: 1978 iu

Confidence interval (Esters): 47(50%) 201(95%) iu

Retention index.

1. Value: 1968 iu

Column Type: Capillary

Column Class: Standard non-polar

Active Phase: SPB-1

Column

Length: 30 m

Carrier Gas: He

Column Diameter: 0.25 mm

Phase Thickness: 0.25  $\mu$ m

Data Type: Linear

RI

Program Type: Ramp

Start T: 50 C

End T: 250 C

Heat Rate: 5 K/min

Start Time: 3 min

End Time: 15

min

Source: Blagojevic, P.; Radulovic, N.; Palic, R.; Stojanovic, G., Chemical composition of the essential oils of Serbian wild-growing *Srtemisia absinthium* and *Artemisia vulgaris*, J. Agric. Food Chem., 54, 2006, 4780-4789.

2.

Value: 1966 iu

Column Type: Capillary

Column Class: Standard non-polar

Active Phase: HP-1

Column Length:

50 m

Carrier Gas: He

Column Diameter: 0.2 mm

Phase Thickness: 0.33  $\mu$ m

Data Type: Linear RI

Program

Type: Ramp

Start T: 60 C

End T: 250 C

Heat Rate: 2 K/min

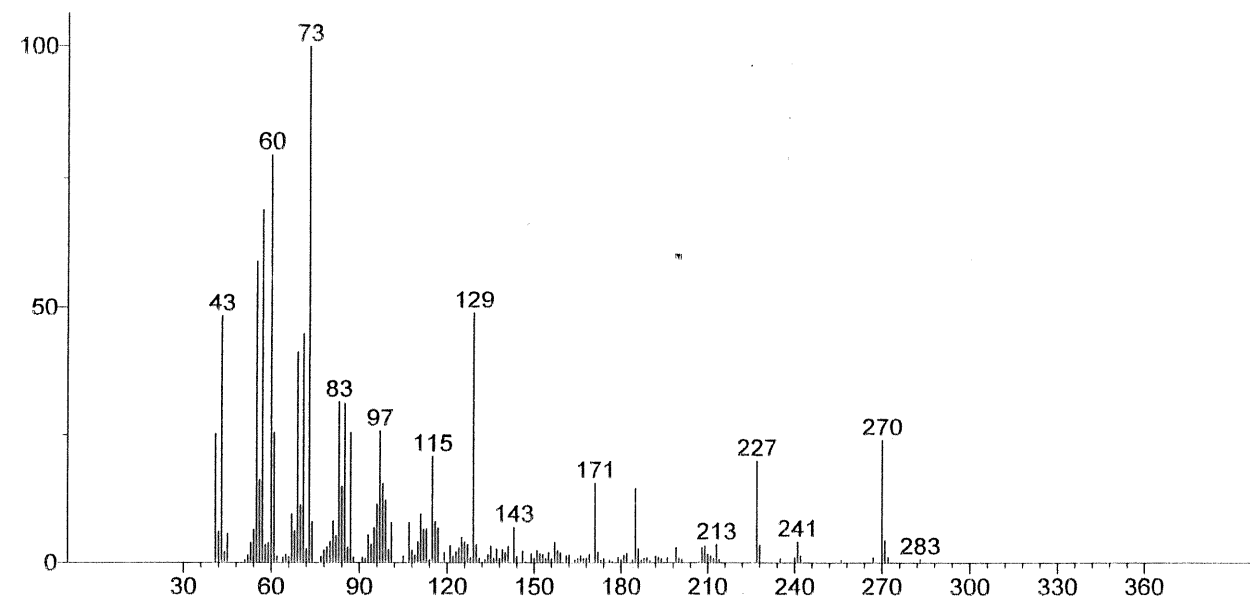

(Text File) +EI Scan (53.616 min) ALI-OLE-H7-220421-.D Subtract

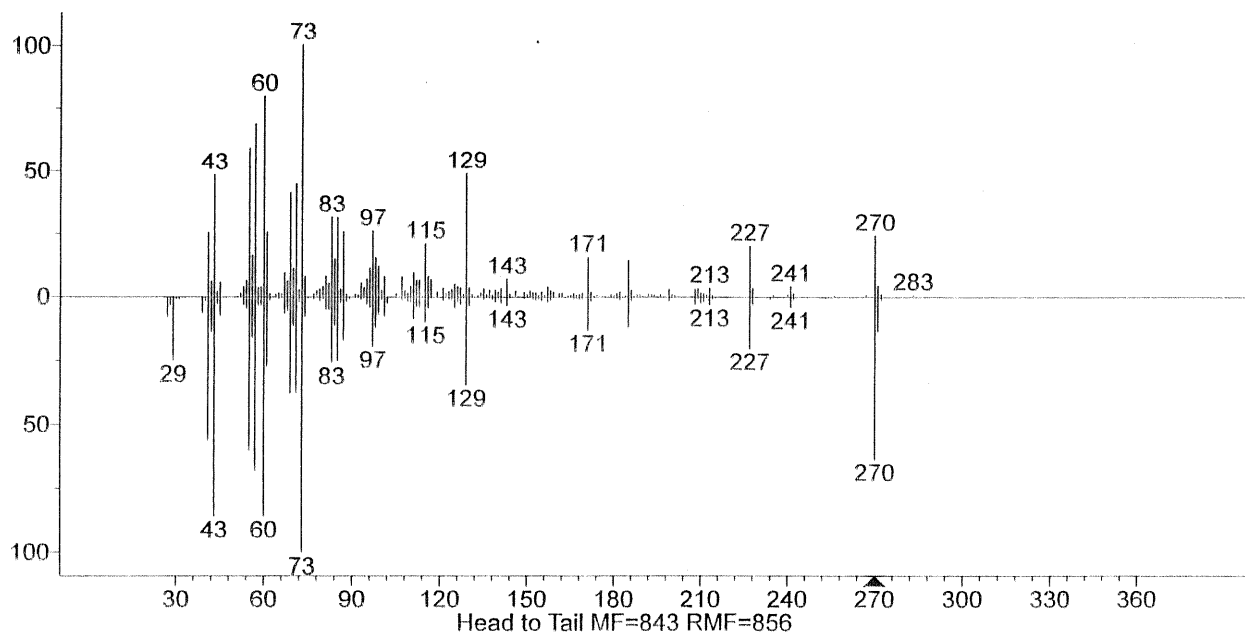

Head to Tail MF=843 RMF=856

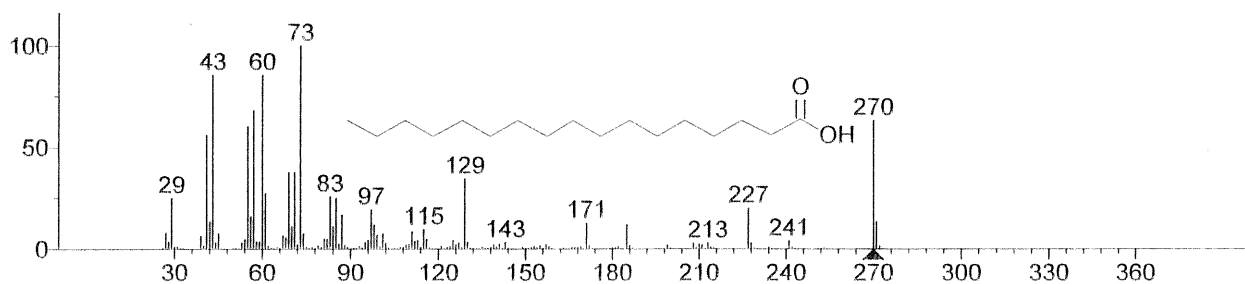

(replib) Heptadecanoic acid

Name: Heptadecanoic acid

Formula:  $C_{17}H_{34}O_2$

MW: 270 CAS#: 506-12-7 NIST#: 36447 ID#: 8383 DB: replib

Other DBs: Fine, TSCA, RTECS, HODOC, NIH, EINECS, IRDB

Contributor: R.T.HOLMAN, UNIVERSITY OF MINNESOTA

10 largest peaks:

73 999 | 43 856 | 60 856 | 57 680 | 270 632 | 55 600 | 41 560 | 69 376 | 71 376 | 129 344 |

Synonyms:

1. n-Heptadecanoic acid

2. n-Heptadecoic acid

3. n-Heptadecylic acid

4. Margaric acid

5. Margarinic acid

6. Normal-heptadecanoic acid

Estimated non-polar retention index (n-alkane scale):

Value: 2067 iu

Confidence interval (Carboxylic acids): 51(50%) 220(95%) iu

Retention index.

1. Value: 2038 iu

Column Type: Capillary

Column Class: Standard non-polar

Active Phase: DB-1

Column

Length: 30 m

Column Diameter: 0.2 mm

Phase Thickness: 0.25  $\mu$ m

Data Type: Linear RI

Program Type:

Ramp

Start T: 50 C

End T: 300 C

Heat Rate: 5 K/min

Start Time: 2 min

End Time: 5 min

Source: Johnson, C.

I.; Urso, A.; Geleta, L., Broad spectrum analysis of municipal and industrial effluents discharged into the Peace, Athabasca and Slave river basins: characterization of effluent samples, 1994 - Volume 1 of 2, Northern River Basins Study Project Report No. 121, Norther River Basins Study, Edmonton, Alberta, 1997, 27.

2. Value: 2039

iu

Column Type: Capillary

Column Class: Standard non-polar

Active Phase: DB-1

Column Length: 30

m

Column Diameter: 0.2 mm

Phase Thickness: 0.25  $\mu$ m

Data Type: Linear RI

Program Type: Ramp

Start T: 50

C

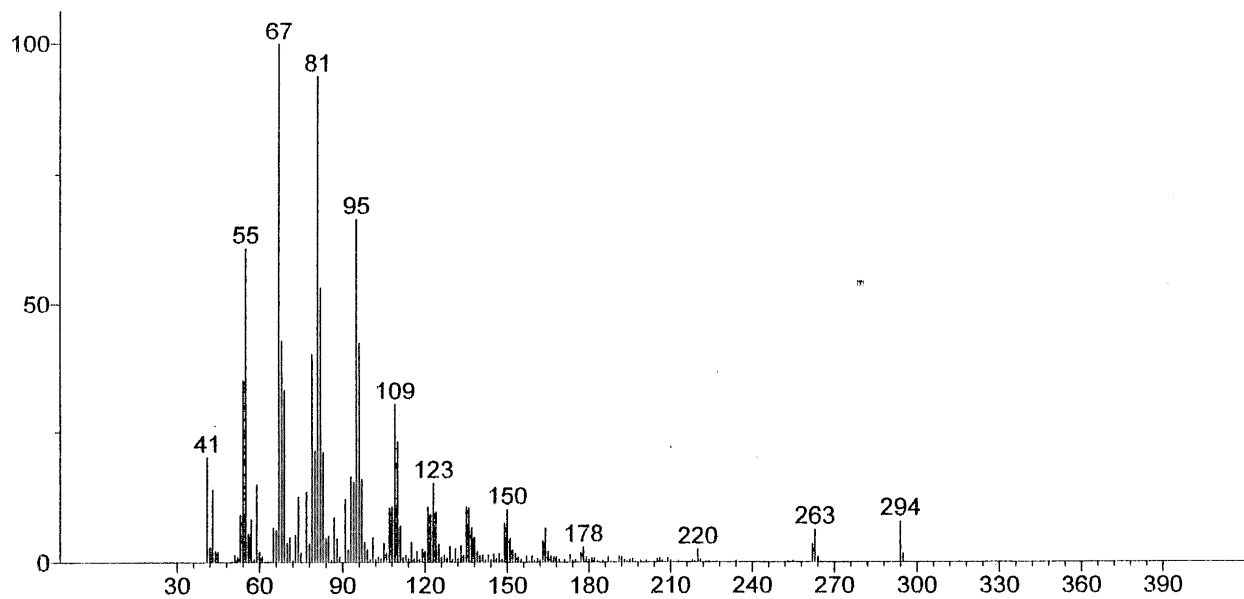

(Text File) +EI Scan (56.186 min) ALI-OLE-H7-220421-.D

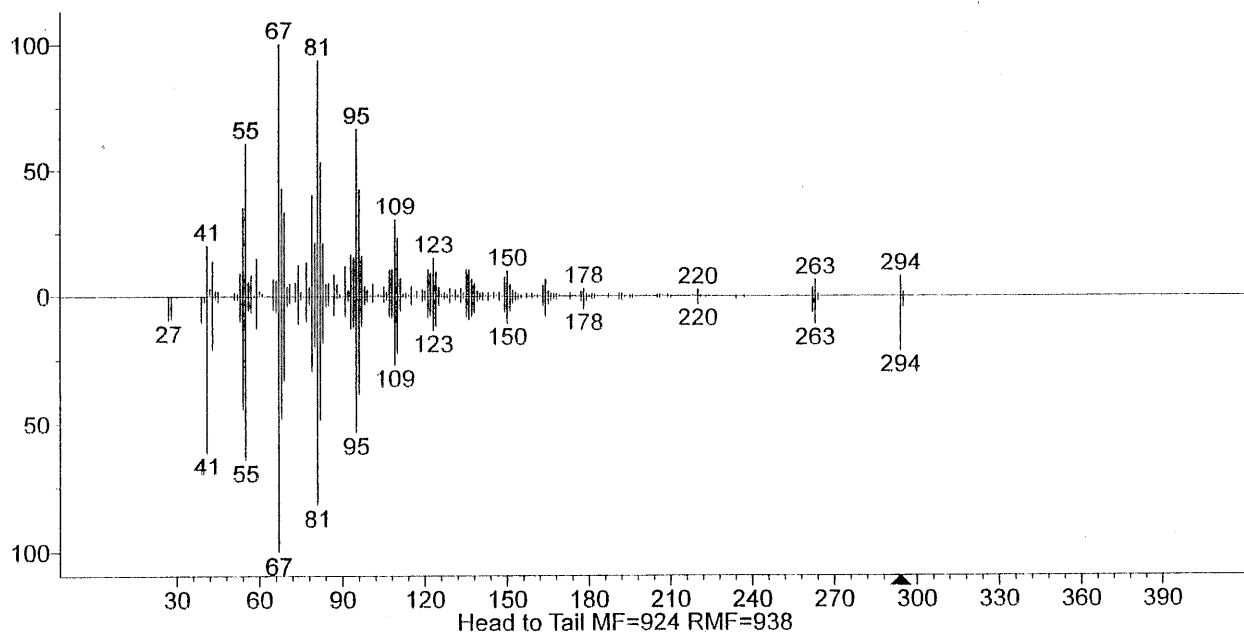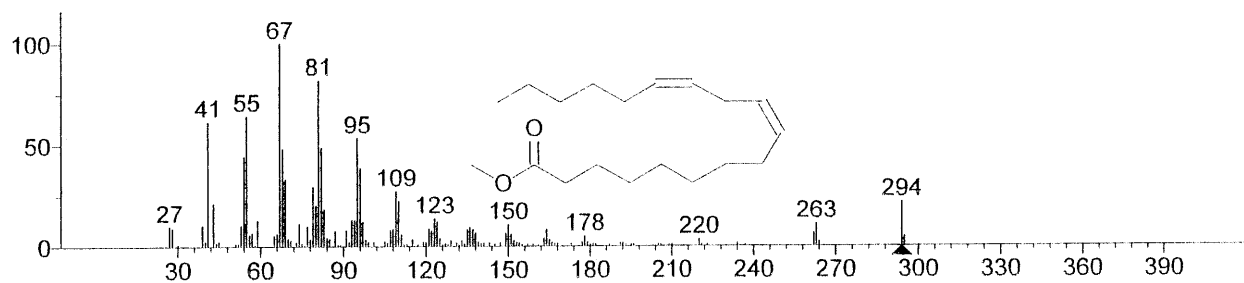

(replib) 9,12-Octadecadienoic acid (Z,Z)-, methyl ester

Name: 9,12-Octadecadienoic acid (Z,Z)-, methyl ester

Formula: C<sub>19</sub>H<sub>34</sub>O<sub>2</sub>

MW: 294 CAS#: 112-63-0 NIST#: 79485 ID#: 7214 DB: replib

Other DBs: Fine, TSCA, EPA, HODOC, NIH, EINECS

Contributor: O A MAMER, MCGILL UNIVERSITY, MONTREAL, CANADA

10 largest peaks:

67 999 | 81 817 | 55 641 | 41 613 | 95 534 | 82 486 | 68 480 | 54 442 | 96 385 | 69 330 |

Synonyms:

1. Linoleic acid, methyl ester

2. Methyl cis,cis-9,12-octadecadienoate

3. Methyl linoleate

4. Methyl octadecadienoate

5. Methyl 9-cis,12-cis-octadecadienoate

6. Methyl (9Z,12Z)-9,12-octadecadienoate #

Estimated non-polar retention index (n-alkane scale):

Value: 2093 iu

Confidence interval (Esters): 47(50%) 201(95%) iu

Retention index.

1. Value: 2071 iu

Column Type: Capillary

Column Class: Standard non-polar

Active Phase: SPB-1

Column

Length: 30 m

Carrier Gas: He

Column Diameter: 0.25 mm

Phase Thickness: 0.25 µm

Data Type: Linear

RI

Program Type: Ramp

Start T: 50 C

End T: 250 C

Heat Rate: 5 K/min

Start Time: 3 min

End Time: 15

min

Source: Blagojevic, P.; Radulovic, N.; Palic, R.; Stojanovic, G., Chemical composition of the essential oils of Serbian wild-growing *Srtemisia absinthium* and *Artemisia vulgaris*, J. Agric. Food Chem., 54, 2006, 4780-4789.

2.

Value: 2087 iu

Column Type: Capillary

Column Class: Standard non-polar

Active Phase: BP-1

Column Length:

30 m

Carrier Gas: N<sub>2</sub>

Column Diameter: 0.32 mm

Phase Thickness: 0.25 µm

Data Type: Linear RI

Program

Type: Ramp



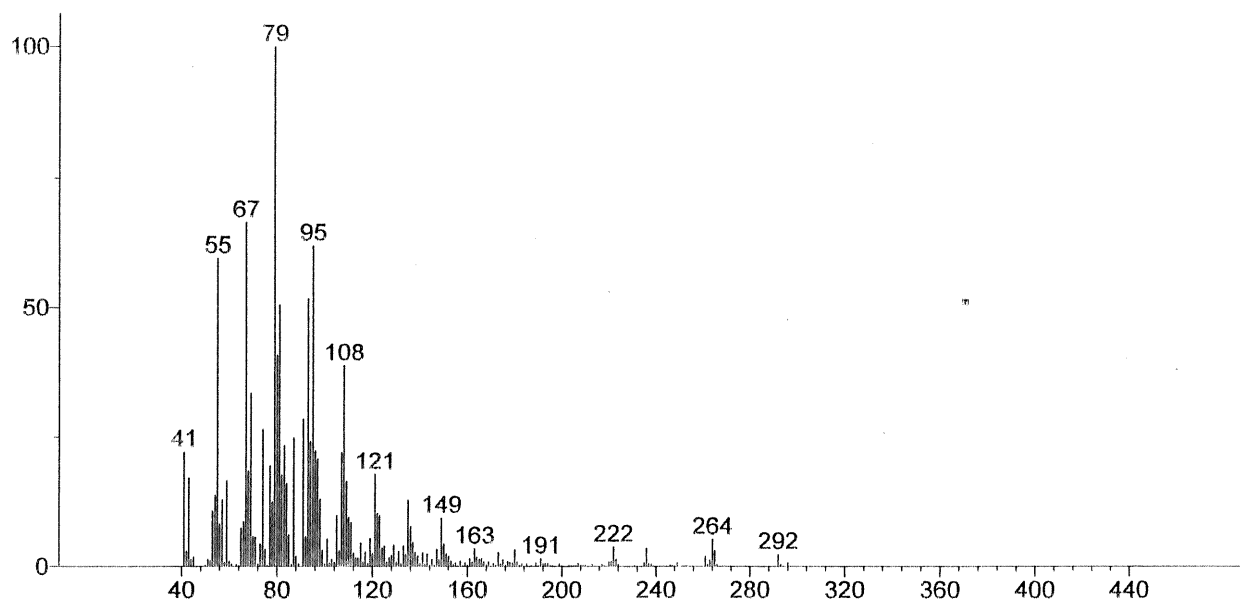

(Text File) +EI Scan (56.774 min) ALI-OLE-H7-220421-.D

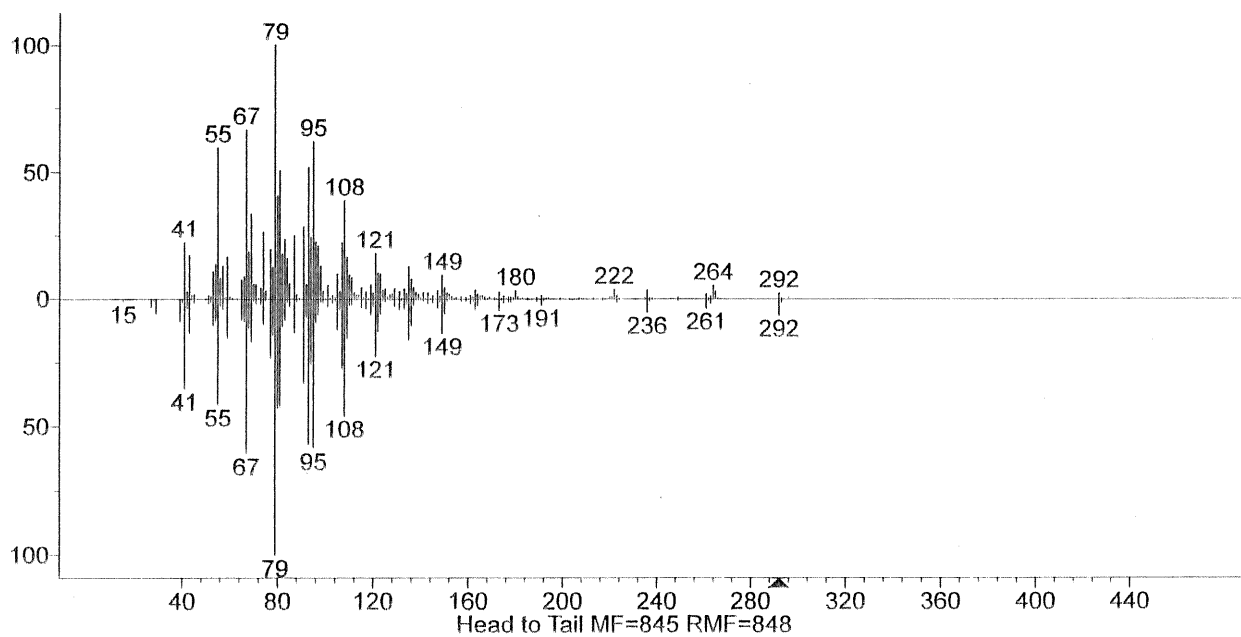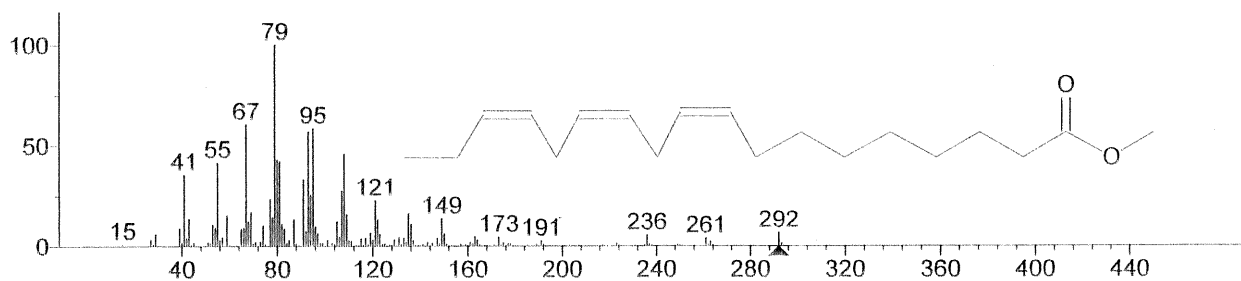

(mainlib) 9,12,15-Octadecatrienoic acid, methyl ester, (Z,Z,Z)-

Name: 9,12,15-Octadecatrienoic acid, methyl ester, (Z,Z,Z)-

Formula: C<sub>19</sub>H<sub>32</sub>O<sub>2</sub>

MW: 292 CAS#: 301-00-8 NIST#: 333199 ID#: 41712 DB: mainlib

Other DBs: Fine, TSCA, HODOC, EINECS

Contributor: NIST Mass Spectrometry Data Center

10 largest peaks:

79 999 | 67 603 | 95 583 | 93 567 | 108 457 | 80 430 | 81 422 | 55 414 | 41 354 | 91 332 |

Synonyms:

1. Linolenic acid, methyl ester

2. Methyl all-cis-9,12,15-octadecatrienoate

3. Methyl linolenate

4. Methyl (9Z,12Z,15Z)-9,12,15-octadecatrienoate #

Estimated non-polar retention index (n-alkane scale):

Value: 2101 iu

Confidence interval (Esters): 47(50%) 201(95%) iu

Retention index.

1. Value: 2077 iu

Column Type: Capillary

Column Class: Standard non-polar

Active Phase: SPB-1

Column

Length: 30 m

Carrier Gas: He

Column Diameter: 0.25 mm

Phase Thickness: 0.25 µm

Data Type: Linear

RI

Program Type: Ramp

Start T: 50 C

End T: 250 C

Heat Rate: 5 K/min

Start Time: 3 min

End Time: 15

min

Source: Radulovic, N.; Lazarevic, J.; Stojanovic, G.; Palic, R., Chemotaxonomically significant 2-ethyl substituted fatty acids from *Stachys milanii* Petrovic (Lamiaceae), *Biochem. Syst. Ecol.*, 34, 2006, 341-344.

2.

Value: 2098 iu

Column Type: Capillary

Column Class: Standard non-polar

Active Phase: HP-1

Column Length:

30 m

Carrier Gas: He

Column Diameter: 0.25 mm

Phase Thickness: 0.33 µm

Data Type: Linear RI

Program

Type: Ramp

Start T: 40 C

End T: 260 C

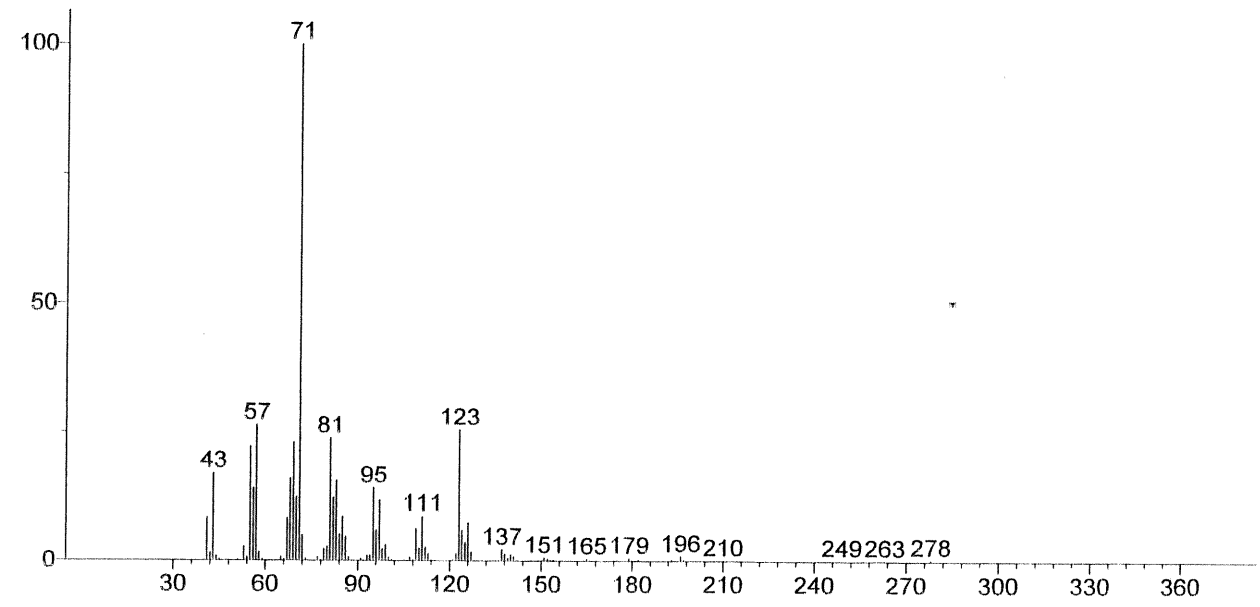

(Text File) +EI Scan (57.725 min) ALI-OLE-H7-220421-.D Subtract

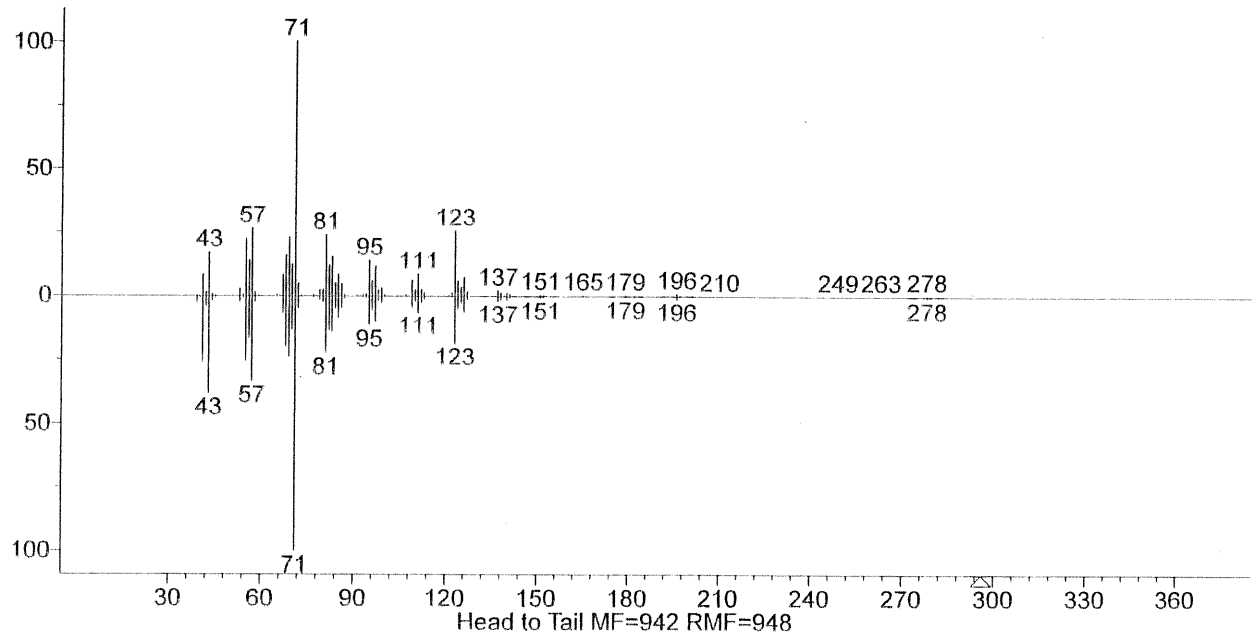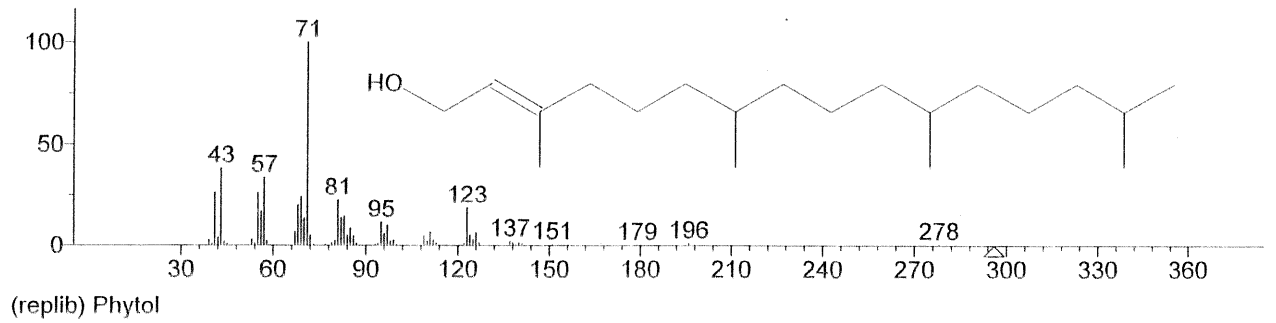

(replib) Phytol

Name: Phytol

Formula: C<sub>20</sub>H<sub>40</sub>O

MW: 296 CAS#: 150-86-7 NIST#: 108727 ID#: 8051 DB: replib

Other DBs: Fine, TSCA, RTECS, HODOC, EINECS

Contributor: Philip Morris R&D

10 largest peaks:

71 999 | 43 381 | 57 334 | 41 260 | 55 259 | 69 239 | 81 223 | 68 199 | 123 184 | 56 169 |

Synonyms:

1.2-Hexadecen-1-ol, 3,7,11,15-tetramethyl-, [R-[R\*,R\*-(E)]]-

2.trans-Phytol

3.3,7,11,15-Tetramethyl-2-hexadecen-1-ol

4.(2E)-3,7,11,15-Tetramethyl-2-hexadecen-1-ol #

Estimated non-polar retention index (n-alkane scale):

Value: 2045 iu

Confidence interval (Alcohols): 41(50%) 176(95%) iu

Retention index.

1. Value: 2104 iu

Column Type: Capillary

Column Class: Standard non-polar

Active Phase: SPB-1

Column

Length: 30 m

Carrier Gas: He

Column Diameter: 0.25 mm

Phase Thickness: 0.25 µm

Data Type: Linear

RI

Program Type: Ramp

Start T: 50 C

End T: 250 C

Heat Rate: 5 K/min

Start Time: 3 min

End Time: 15

min

Source: Radulovic, N.; Lazarevic, J.; Stojanovic, G.; Palic, R., Chemotaxonomically significant 2-ethyl substituted fatty acids from *Stachys milanii* Petrovic (Lamiaceae), *Biochem. Syst. Ecol.*, 34, 2006, 341-344.

2.

Value: 2099 iu

Column Type: Capillary

Column Class: Standard non-polar

Active Phase: RTX-1

Column Length:

60 m

Carrier Gas: He

Column Diameter: 0.22 mm

Phase Thickness: 0.25 µm

Data Type: Linear RI

Program

Type: Ramp

Start T: 60 C

End T: 230 C

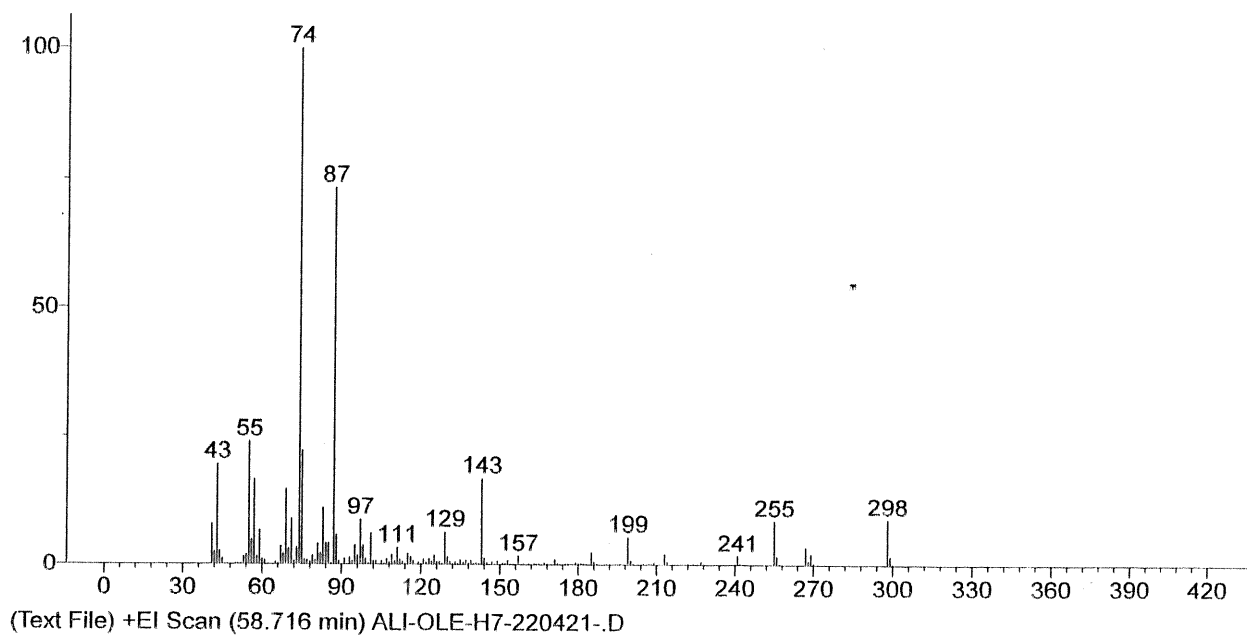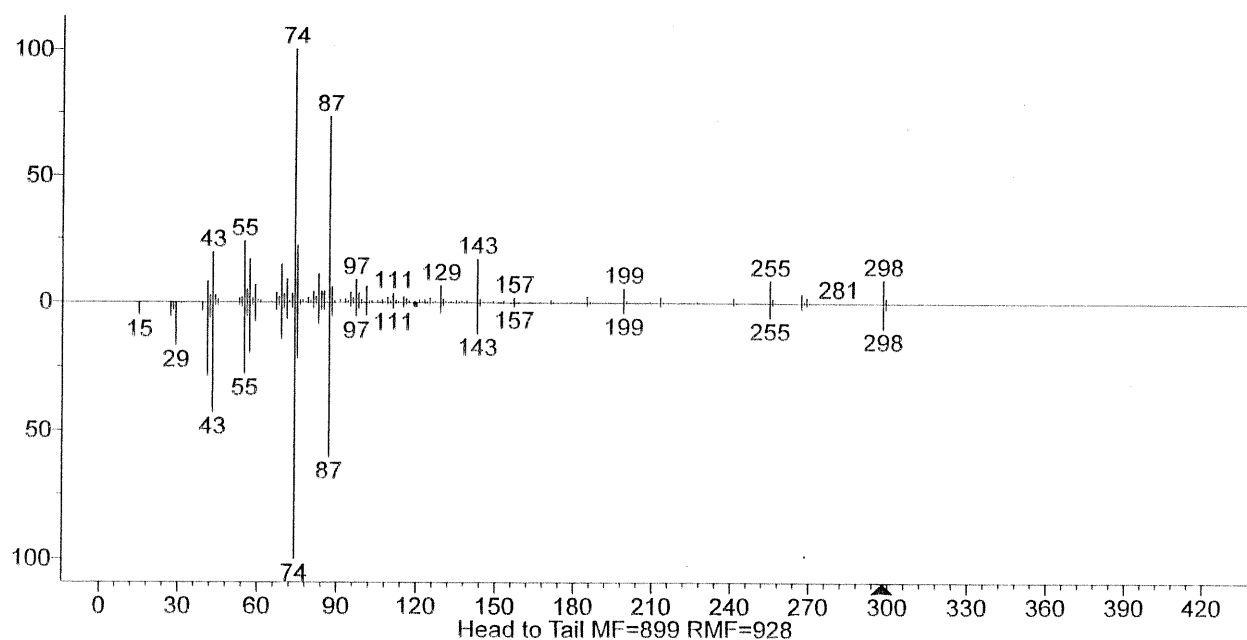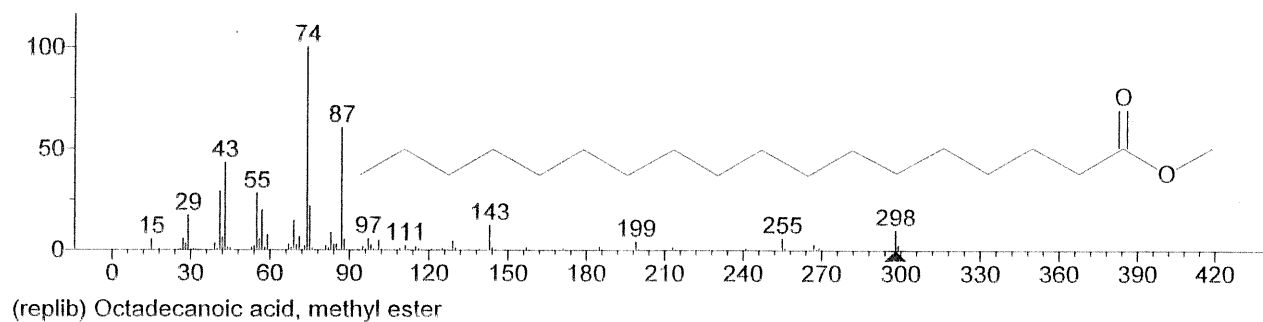

Name: Octadecanoic acid, methyl ester

Formula: C<sub>19</sub>H<sub>38</sub>O<sub>2</sub>

MW: 298 CAS#: 112-61-8 NIST#: 79123 ID#: 9086 DB: replib

Other DBs: Fine, TSCA, RTECS, EPA, HODOC, NIH, EINECS, IRDB

Contributor: O A MAMER, MCGILL UNIVERSITY, MONTREAL,

10 largest peaks:

74 999 | 87 604 | 43 430 | 41 289 | 55 278 | 75 218 | 57 197 | 29 169 | 69 143 | 143 121 |

Synonyms:

1. Stearic acid, methyl ester
2. n-Octadecanoic acid, methyl ester
3. Kemester 9718
4. Methyl n-octadecanoate
5. Methyl octadecanoate
6. Methyl stearate
7. Metholene 2218
8. Emery 2218
9. Kemester 9018
10. Methyl ester of octadecanoic acid
11. Kemester 4516
12. Methyl (Z)-9-octadecenoate

Estimated non-polar retention index (n-alkane scale):

Value: 2077 iu

Confidence interval (Esters): 47(50%) 201(95%) iu

Retention index.

1. Value: 2133 iu

Column Type: Capillary

Column Class: Standard non-polar

Active Phase: HP-1

Column

Length: 30 m

Carrier Gas: He

Column Diameter: 0.25 mm

Phase Thickness: 0.33 µm

Data Type: Linear

RI

Program Type: Ramp

Start T: 40 C

End T: 260 C

Heat Rate: 2 K/min

Start Time: 5 min

End Time: 20

min

Source: Senatore, F.; Rigano, D.; de Fusco, R.; Bruno, M., Volatile components of *Centaurea cineraria* L. subsp. *umbrosa* (Iacaita) Pign. and *Centaurea napifolia* L. (Asteraceae), two species growing wild in Sicily, Flavour Fragr. J., 18, 2003, 248-251.

2. Value: 2111 iu

Column Type: Capillary

Column Class: Standard non

-polar

Active Phase: DB-1

Column Length: 15 m

Name: 9,12,15-Octadecatrienoic acid, (Z,Z,Z)-

Formula: C<sub>18</sub>H<sub>30</sub>O<sub>2</sub> 79

MW: 278 CAS#: 463-40-1 NIST#: 333201 ID#: 41695 DB: mainlib

Other DBs: Fine, TSCA, HODOC, NIH, EINECS

Contributor: NIST Mass Spectrometry Data Center

10 largest peaks:

79 999 | 67 624 | 93 503 | 95 478 | 55 463 | 80 460 | 41 408 | 108 391 | 81 373 | 91 299 |

Synonyms:

1. Linolenic acid

2.  $\alpha$ -Linolenic acid

3. All-cis-9,12,15-Octadecatrienoic acid

4. cis,cis,cis-9,12,15-Octadecatrienoic acid

5. (Z,Z,Z)-9,12,15-Octadecatrienoic acid

6. Industriene 120

Estimated non-polar retention index (n-alkane scale):

Value: 2191 iu

Confidence interval (Carboxylic acids): 51 (50%) 220 (95%) iu

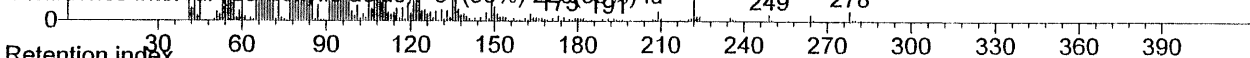

Retention index: 30 60 90 120 150 180 210 240 270 300 330 360 390

Test File: E1 Scan (60.651 min) ALI-OLE-H7-220421-D

Column Type: Capillary

Column Class: Standard non-polar

Active Phase: HP-101 79

Column

Length: 25 m

Carrier Gas: He

Column Diameter: 0.53 mm

Phase Thickness: 0.2  $\mu$ m

Data Type: Normal alkane

RI

Program Type: Ramp

Start T: 70 C

End T: 200 C

Heat Rate: 3 K/min

Start Time: 2 min

Source: Jerkovic, I.,

Mastelic, J.; Marijanovic, Z., Bound volatile compounds and essential oil from the fruit of *Maclura pomifera* (Raf.) Schneid. (osage orange), Flavour Fragr. J., 22, 2007, 84-88.

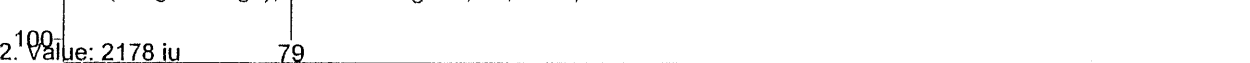

2. Value: 2178 iu 79

Column Type: Other 60

Column

Class: Standard non-polar

Active Phase: Methyl Silicone

Data Type: Normal alkane 79

Program Type:

Ramp

Source: Ardrey, R.E.; Moffat, A.C., Gas-liquid chromatographic retention indices of 1318 substances of toxicological interest on SE-30 or OV-1 stationary phase, J. Chromatogr., 220, 1981, 195-252.

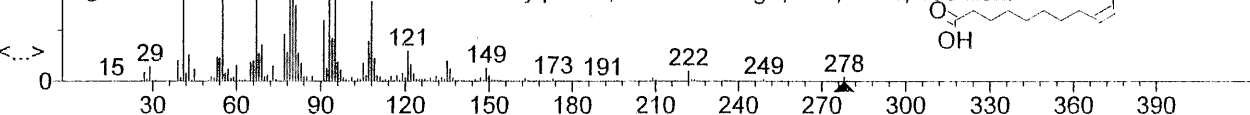

(mainlib) 9,12,15-Octadecatrienoic acid, (Z,Z,Z)-





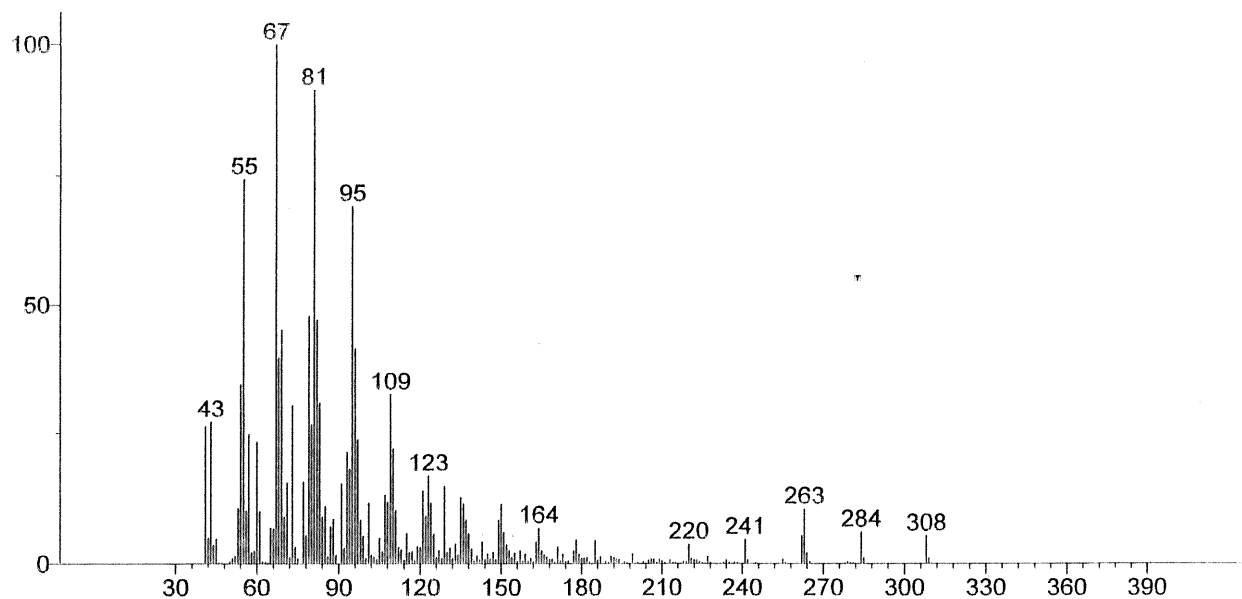

(Text File) +EI Scan (61.999 min) ALI-OLE-H7-220421-.D

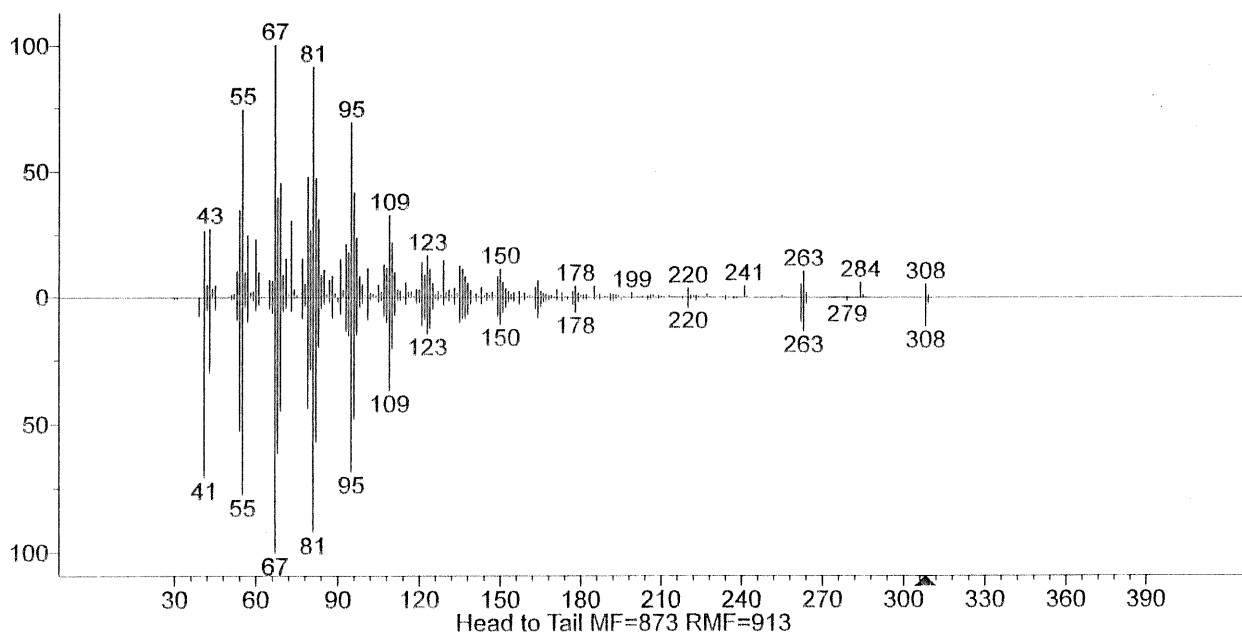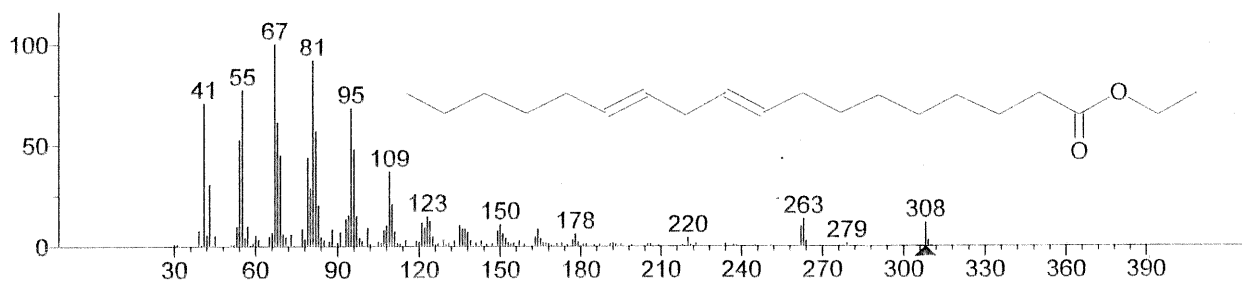

(mainlib) 9,12-Octadecadienoic acid, ethyl ester

Name: 9,12-Octadecadienoic acid, ethyl ester

Formula: C<sub>20</sub>H<sub>36</sub>O<sub>2</sub>

MW: 308 CAS#: 7619-08-1 NIST#: 249157 ID#: 28827 DB: mainlib

Other DBs: HODOC

Contributor: TNO Volatile Compounds in Food - Chemical Concepts

10 largest peaks:

67 999 | 81 919 | 55 772 | 41 707 | 95 683 | 68 613 | 82 569 | 54 525 | 96 478 | 69 448 |

Synonyms:

1.Ethyl (9E,12E)-9,12-octadecadienoate #

Estimated non-polar retention index (n-alkane scale):

Value: 2193 iu

Confidence interval (Esters): 47(50%) 201(95%) iu

Retention index.

1. Value: 2171 iu

Column Type: Capillary

Column Class: Semi-standard non-polar

Active Phase: HP

-5MS

Column Length: 30 m

Carrier Gas: He

Column Diameter: 0.25 mm

Phase Thickness: 0.25 µm

Data Type:

Normal alkane RI

Program Type: Complex

Description: 40C (10min) => 3C/min =>120C =>10C/min =>250C (5min)

Source: Ansorena, D.; Gimeno, O.; Astiasarán, I.; Bello, J., Analysis of volatile compounds by GC-MS of a dry fermented sausage: chorizo de Pamplona, Food Res. Int., 34, 2001, 67-75.

2. Value: 2527 iu

Column Type:

Capillary

Column Class: Standard polar

Active Phase: CP-Wax 52CB

Column Length: 60 m

Carrier Gas:

He

Column Diameter: 0.25 mm

Phase Thickness: 0.25 µm

Data Type: Linear RI

Program Type:

Complex

Description: 45C(5min) =>10C/min =>80C =>2C/min =>240C

Source: Romeo, V.; Ziino, M.; Giuffrida,

D.; Condurso, C.; Verzera, A., Flavour profile of capers (*Capparis spinosa* L.) from the Eolian Archipelago by HS-SPME/GC-MS, Food Chem., 101, 2007, 1272-1278.

<...>

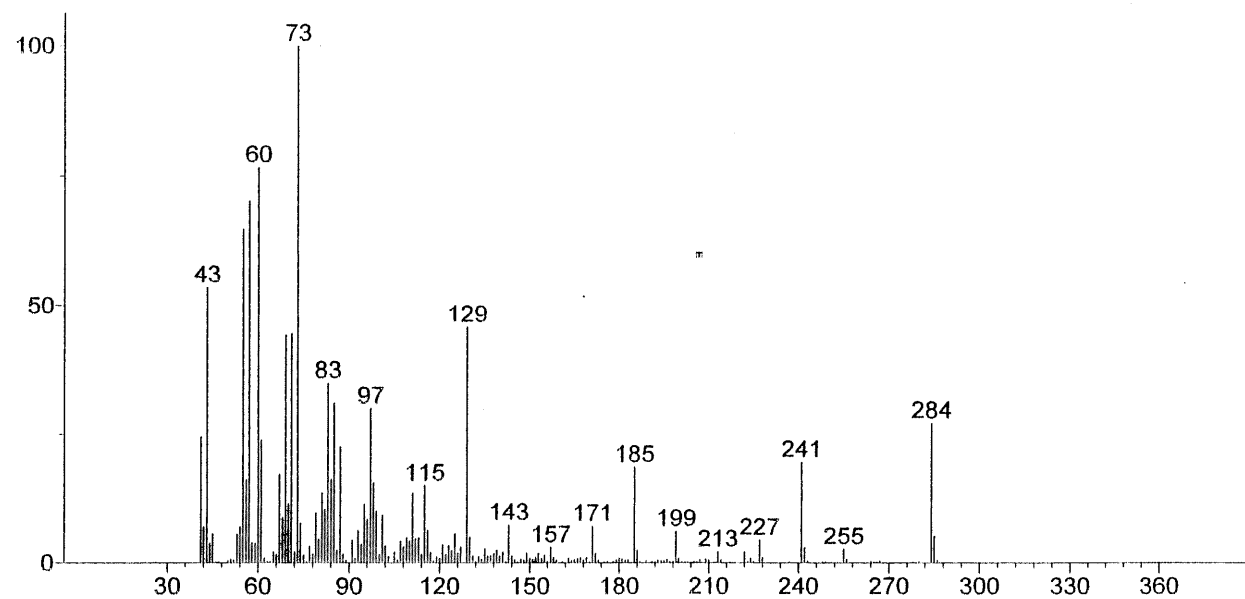

(Text File) +EI Scan (62.252 min) ALI-OLE-H7-220421-.D

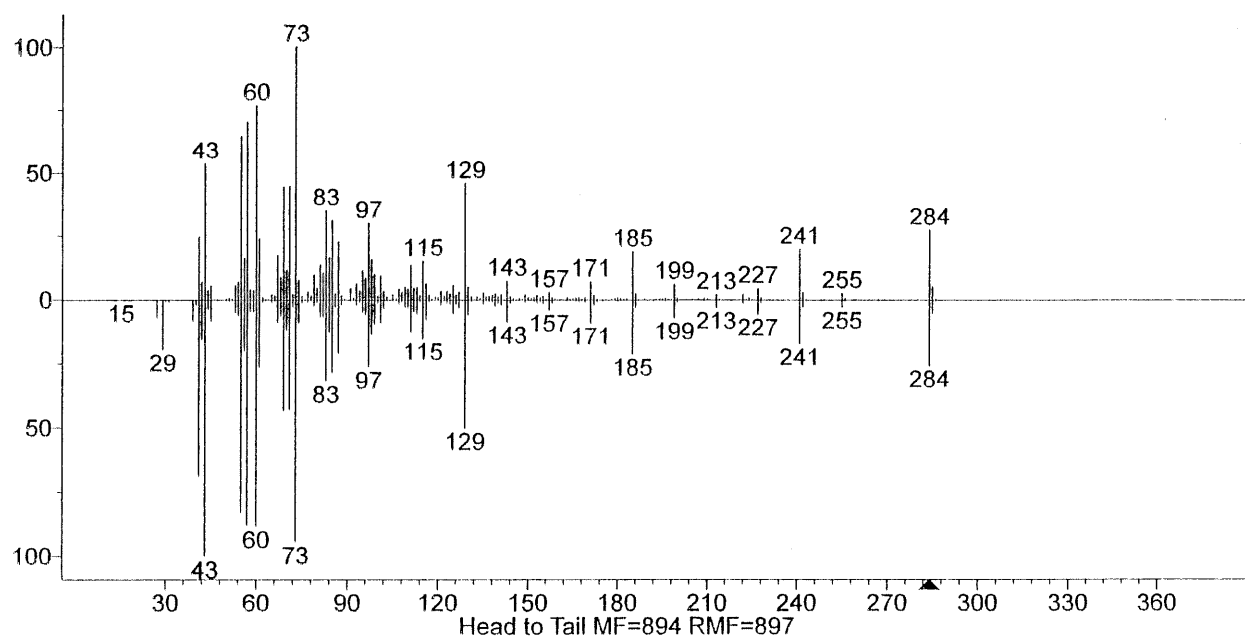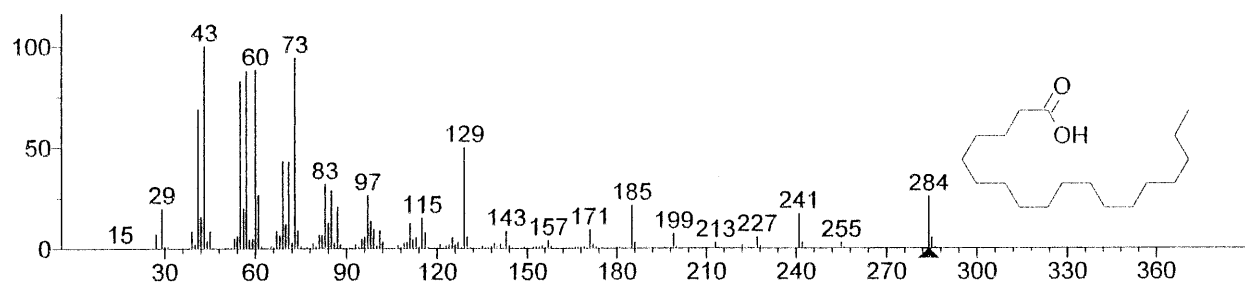

(mainlib) Octadecanoic acid

Name: Octadecanoic acid

Formula:  $C_{18}H_{36}O_2$

MW: 284 CAS#: 57-11-4 NIST#: 290961 ID#: 8481 DB: mainlib

Other DBs: Fine, TSCA, RTECS, EPA, HODOC, NIH, EINECS, IRDB

Contributor: NIST Mass Spectrometry Data Center, 1998.

10 largest peaks:

43 999 | 73 942 | 60 881 | 57 875 | 55 827 | 41 688 | 129 500 | -69 432 | 71 429 | 83 317 |

Synonyms:

1. Stearic acid
2. n-Octadecanoic acid
3. Humko Industrene R
4. Hydrofol Acid 150
5. Hystrene S-97
6. Hystrene T-70
7. Hystrene 80
8. Industrene R
9. Kam 1000
10. Kam 2000
11. Kam 3000
12. Neo-Fat 18
13. Neo-Fat 18-53
14. Neo-Fat 18-54
15. Neo-Fat 18-55
16. Neo-Fat 18-59
17. NAA 173
18. PD 185
19. Stearex Beads
20. Stearophanic acid
21. Steric acid
22. Vanicol
23. 1-Heptadecanecarboxylic acid
24. Heptadecanecarboxylic acid
25. Neo-fat 18-61
26. Pearl stearic
27. Century 1240
28. Dar-chem 14
29. Emersol 120
30. Emersol 132
31. Emersol 150
32. Formula 300
33. Glycon dp
34. Glycon tp
35. Glycon S-70
36. Glycon S-80
37. Glycon S-90
38. Groco 54
39. Groco 55
40. Groco 55l
41. Groco 58
42. Groco 59
43. Hy-phi 1199
44. Hy-phi 1205
45. Hy-phi 1303
46. Hy-phi 1401

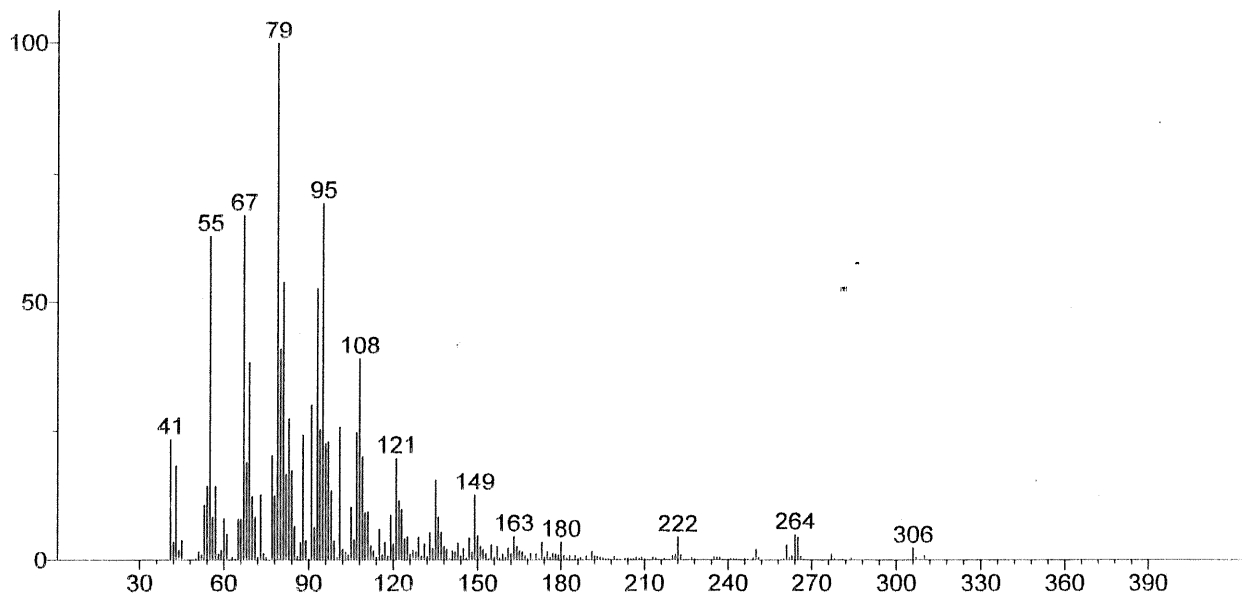

(Text File) +EI Scan (62.722 min) ALI-OLE-H7-220421-.D

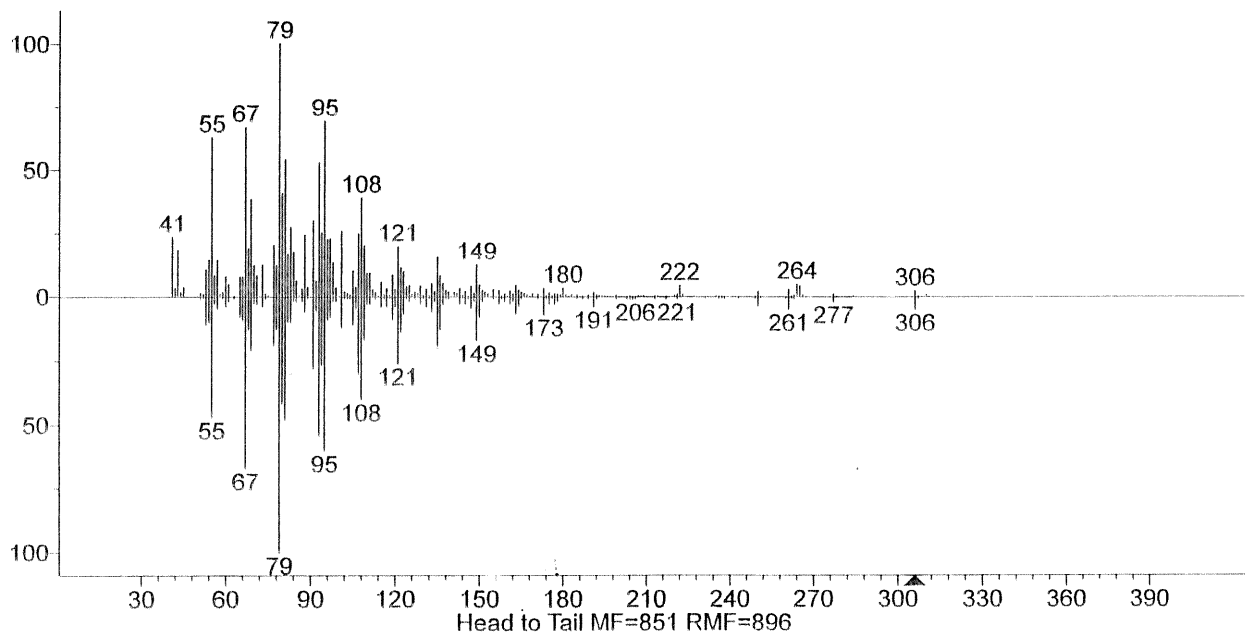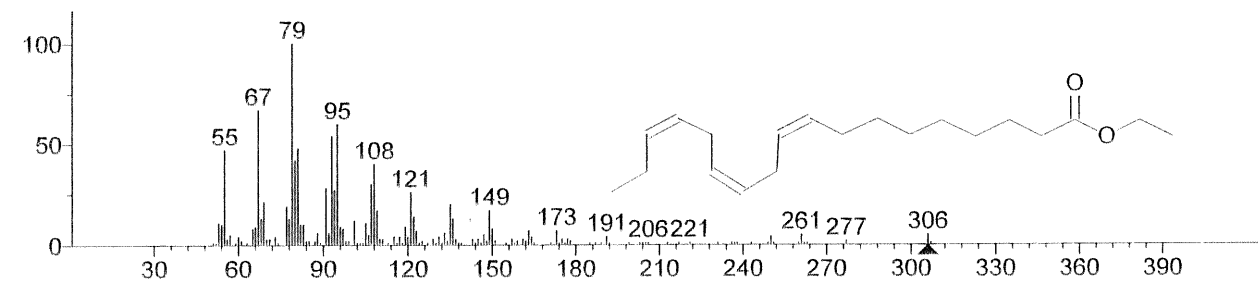

(mainlib) Ethyl 9,12,15-octadecatrienoate

Name: Ethyl 9,12,15-octadecatrienoate

Formula:  $C_{20}H_{34}O_2$

MW: 306 NIST#: 336774 ID#: 41709 DB: mainlib

Contributor: William W. Christie, Mylnefield Lipid Analysis, Invergowrie, Dundee, Scotland, UK

10 largest peaks:

79 999 | 67 669 | 95 599 | 93 539 | 81 479 | 55 469 | 80 419 | 108 399 | 107 299 | 91 279 |

Synonyms:

no synonyms.

Estimated non-polar retention index (n-alkane scale):

Value: 2201 iu

Confidence interval (Esters): 47(50%) 201(95%) iu

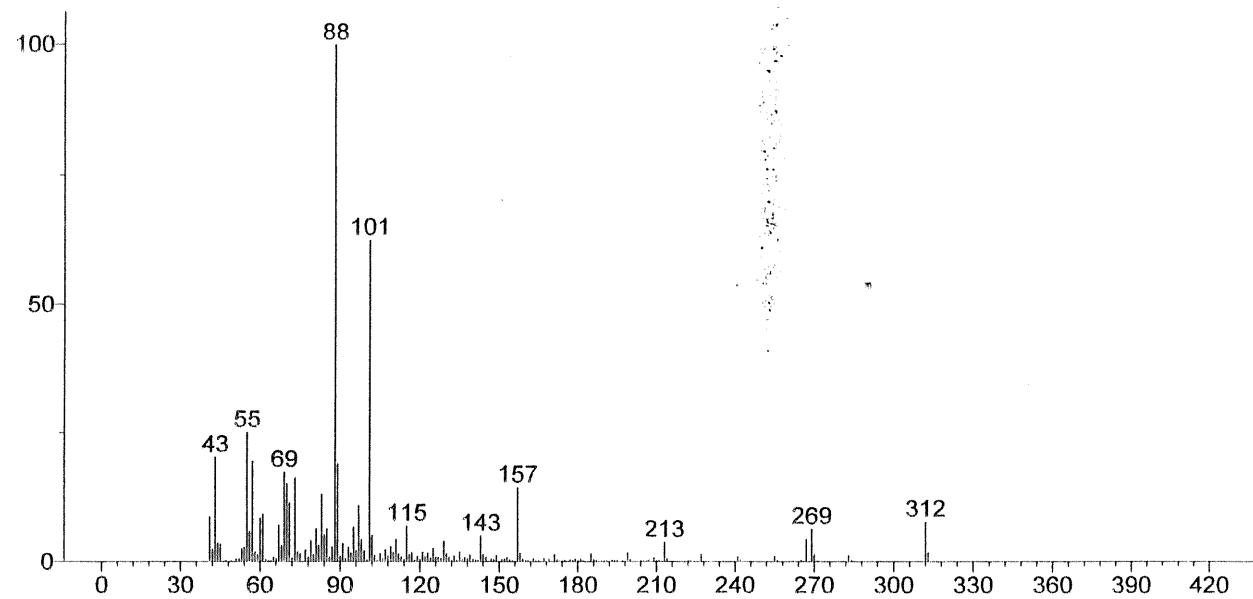

(Text File) +EI Scan (65.260 min) ALI-OLE-H7-220421-.D

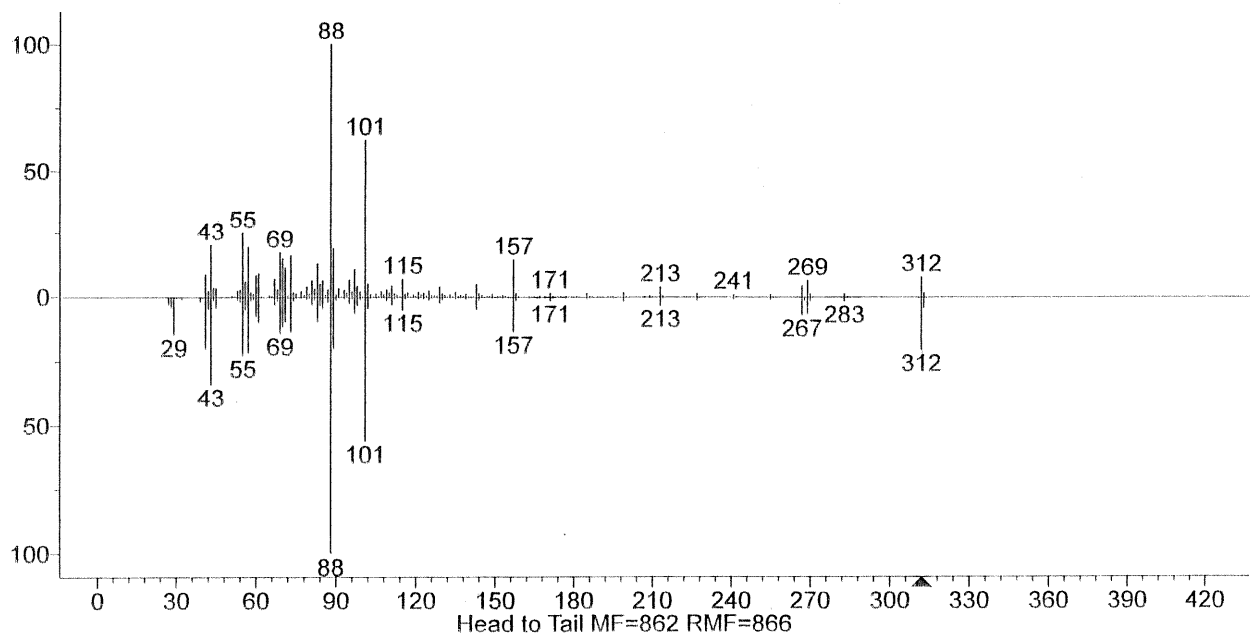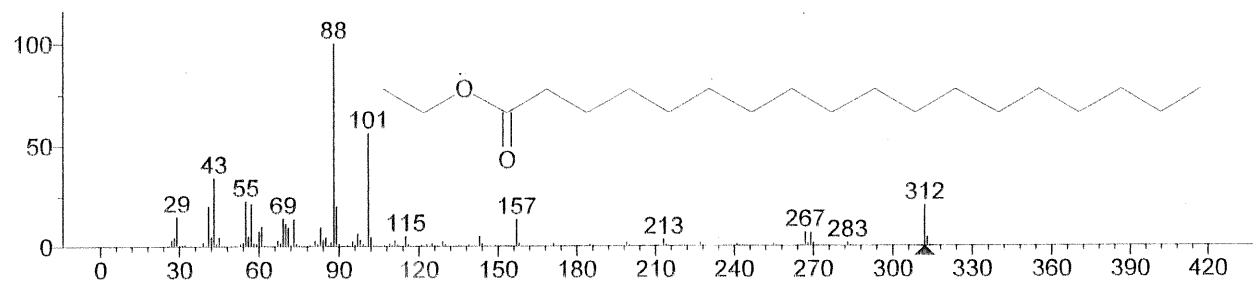

(replib) Octadecanoic acid, ethyl ester

Name: Octadecanoic acid, ethyl ester

Formula:  $C_{20}H_{40}O_2$

MW: 312 CAS#: 111-61-5 NIST#: 36393 ID#: 11117 DB: replib

Other DBs: Fine, TSCA, RTECS, HODOC, NIH, EINECS, IRDB

Contributor: R.T.HOLMAN, UNIVERSITY OF MINNESOTA

10 largest peaks:

88 999 | 101 559 | 43 339 | 55 226 | 57 213 | 312 203 | 41 200 | 89 200 | 29 146 | 69 139 |

Synonyms:

1. Stearic acid, ethyl ester

2. Ethyl n-octadecanoate

3. Ethyl octadecanoate

4. Ethyl stearate

5. Radia 7185

Estimated non-polar retention index (n-alkane scale):

Value: 2177 iu

Confidence interval (Esters): 47(50%) 201(95%) iu

Retention index.

1. Value: 2181 iu

Column Type: Capillary

Column Class: Standard non-polar

Active Phase: CP Sil 5 CB

Column

Length: 50 m

Carrier Gas: He

Column Diameter: 0.32 mm

Phase Thickness: 0.4  $\mu$ m

Data Type: Linear

RI

Program Type: Ramp

Start T: 60 C

End T: 280 C

Heat Rate: 3 K/min

Start Time: 10 min

End Time: 60

min

Source: Pino, J.A.; Marbot, R.; Vázquez, C., Characterization of volatiles in strawberry guava (*Psidium cattleianum* Sabine) fruit, J. Agric. Food Chem., 49, 2001, 5883-5887.

2. Value: 2202 iu

Column Type:

Capillary

Column Class: Standard non-polar

Active Phase: OV-1

Column Length: 25 m

Carrier Gas:

He

Column Diameter: 0.32 mm

Data Type: Linear RI

Program Type: Ramp

Start T: 40 C

End T: 280 C

Heat



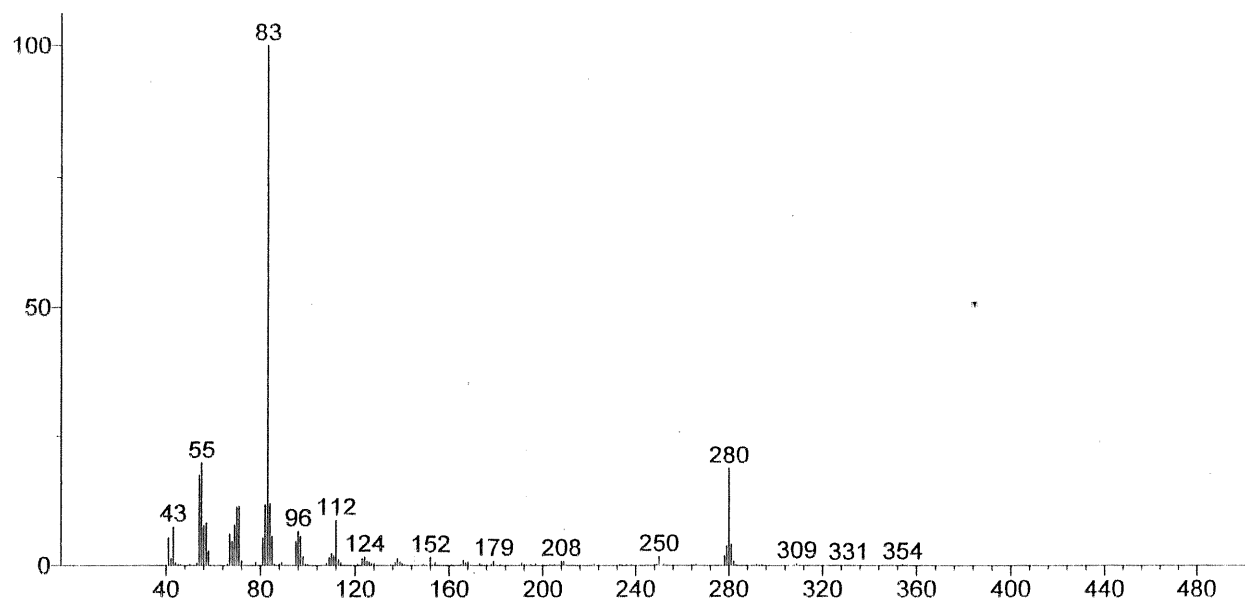

(Text File) +EI Scan (72.088 min) ALI-OLE-H7-220421-.D Subtract

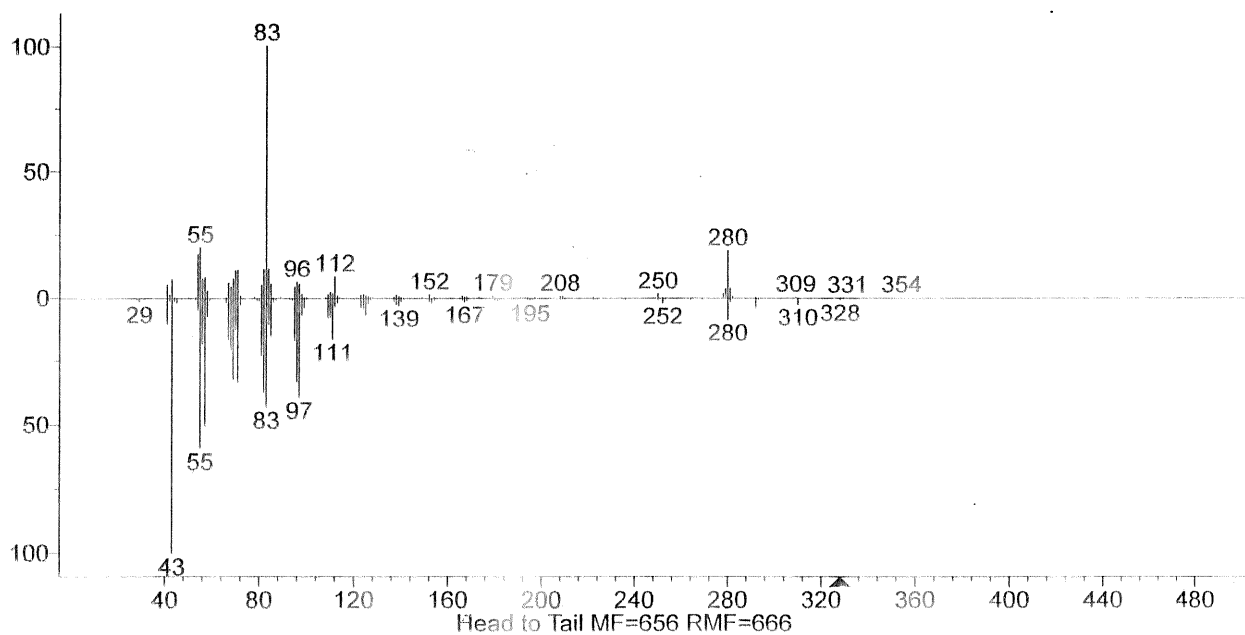

Head to Tail MF=656 RMF=666

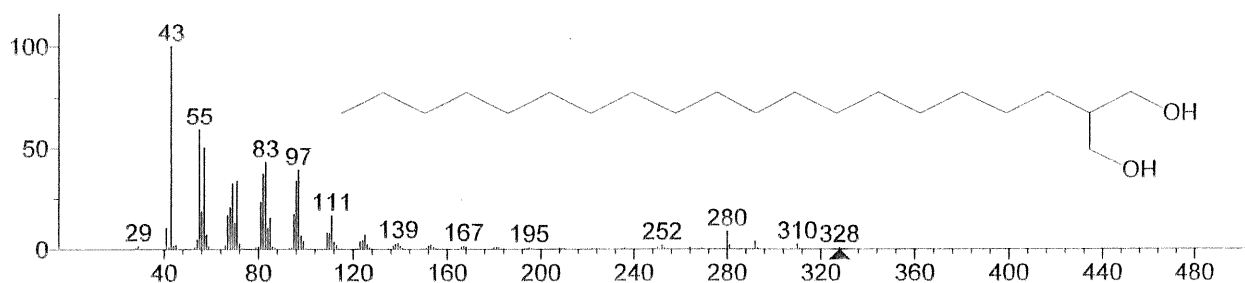

(mainlib) 2-Octadecyl-propane-1,3-diol

Name: 2-Octadecyl-propane-1,3-diol

Formula:  $C_{21}H_{44}O_2$

MW: 328 CAS#: 5337-61-1 NIST#: 193417 ID#: 6741 DB: mainlib

Other DBs: None

Contributor: Chemical Concepts

10 largest peaks:

43 999 | 55 589 | 57 503 | 83 429 | 97 391 | 82 372 | 71 337 | 96 337 | 69 323 | 81 232 |

Synonyms:

1,2-Octadecyl-1,3-propanediol #

Estimated non-polar retention index (n-alkane scale):

Value: 2530 iu

Confidence interval (Alcohols): 41(50%) 176(95%) iu

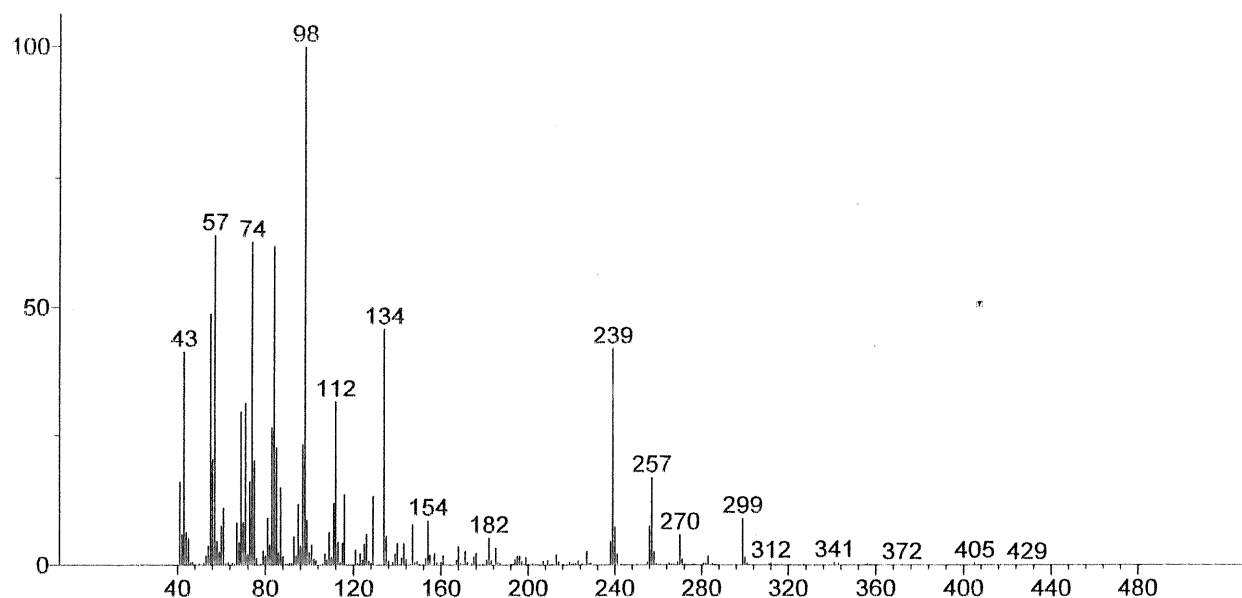

(Text File) +EI Scan (75.951 min) ALI-OLE-H7-220421-.D Subtract

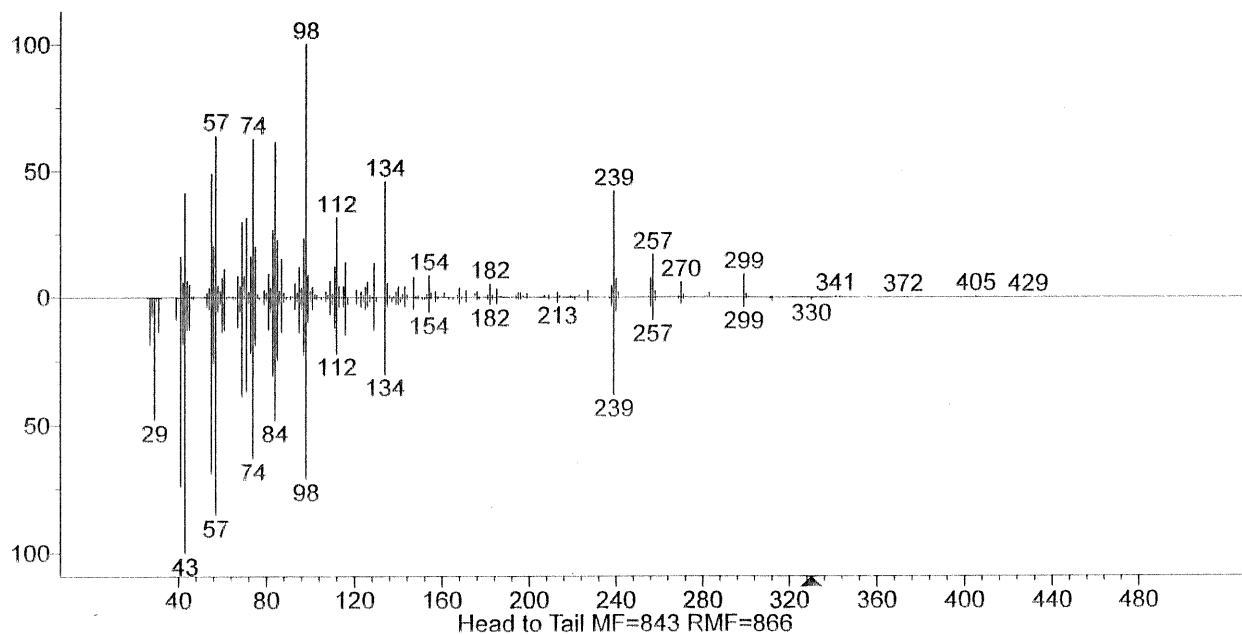

Head to Tail MF=843 RMF=866

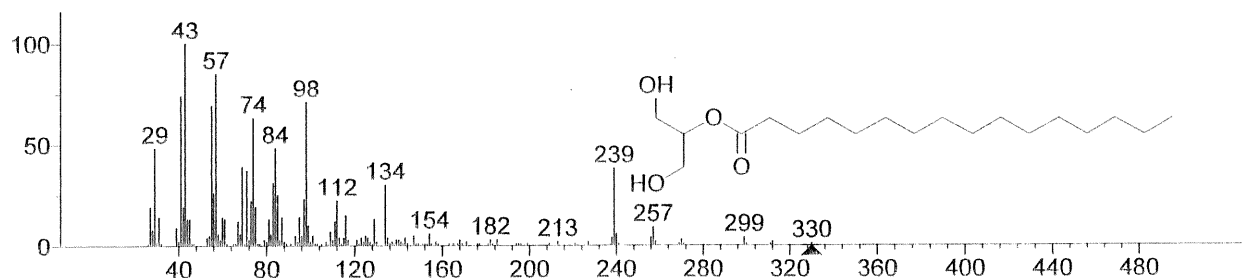

(mainlib) Hexadecanoic acid, 2-hydroxy-1-(hydroxymethyl)ethyl ester

Name: Hexadecanoic acid, 2-hydroxy-1-(hydroxymethyl)ethyl ester

Formula:  $C_{19}H_{38}O_4$

MW: 330 CAS#: 23470-00-0 NIST#: 15400 ID#: 7156 DB: mainlib

Other DBs: None

10 largest peaks:

43 999 | 57 850 | 41 740 | 98 710 | 55 690 | 74 630 | 29 480 | 84 480 | 69 390 | 239 380 |

Synonyms:

1. Palmitin, 2-mono-
2. Palmitic acid  $\beta$ -monoglyceride
3. 2-Hexadecanoyl glycerol
4. 2-Monopalmitin
5. 2-Monopalmitoyl-sn-glycerol
6. 1,2,3-Propanetriol 2-hexadecanoyl ester
7. Glycerol  $\beta$ -palmitate
8. 2-Hydroxy-1-(hydroxymethyl)ethyl palmitate #

Estimated non-polar retention index (n-alkane scale):

Value: 2498 iu

Confidence interval (Diverse functional groups): 89(50%) 382(95%) iu

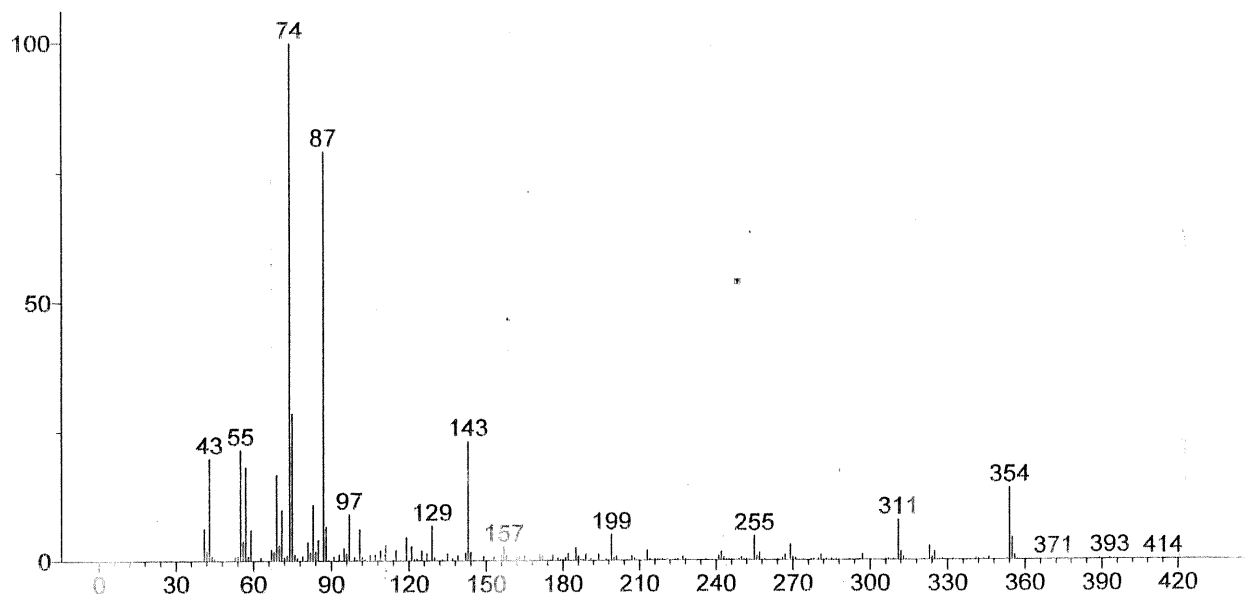

(Text File) +EI Scan (76.286 min) ALI-OLE-H7-220421-.D Subtract

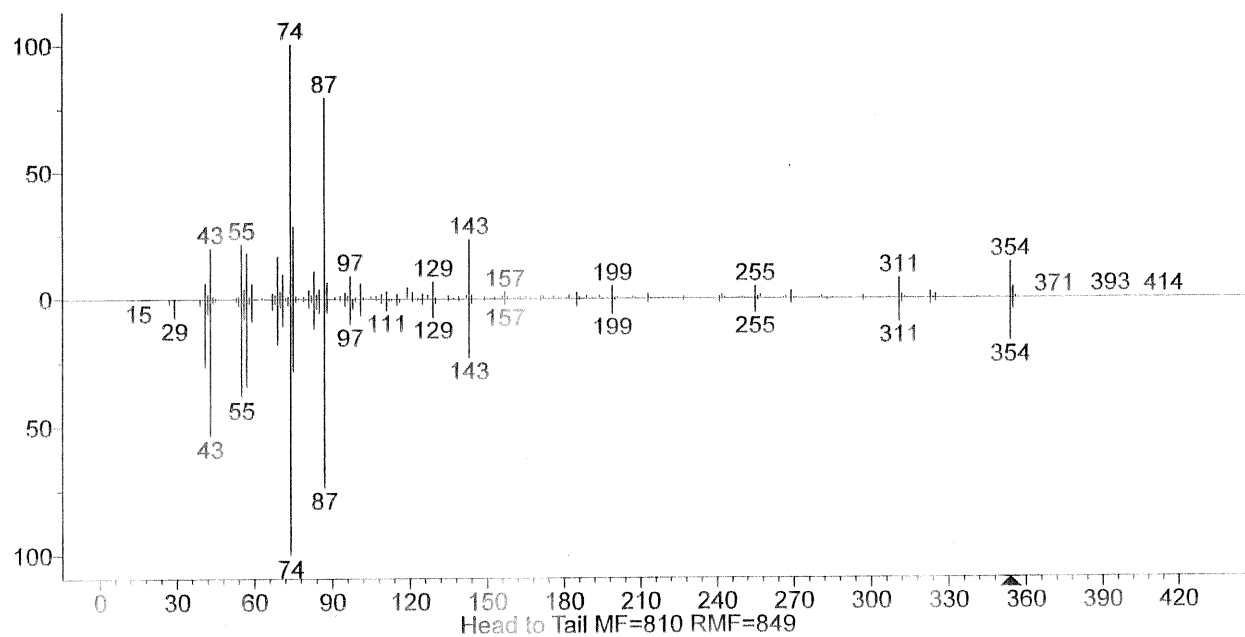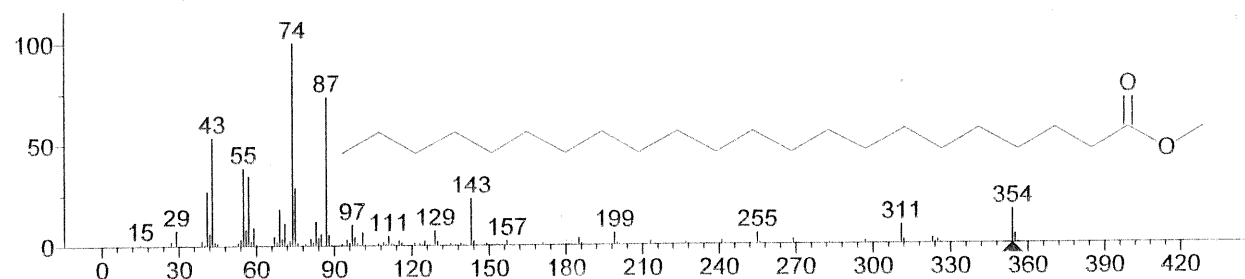

(mainlib) Docosanoic acid, methyl ester

166  
Name: Docosanoic acid, methyl ester

Formula: C<sub>23</sub>H<sub>46</sub>O<sub>2</sub>

MW: 354 CAS#: 929-77-1 NIST#: 333108 ID#: 38271 DB: mainlib

Other DBs: Fine, TSCA, HODOC, NIH, EINECS

Contributor: NIST Mass Spectrometry Data Center

10 largest peaks:

74 999 | 87 734 | 43 534 | 55 383 | 57 344 | 75 284 | 41 266 | 143 230 | 69 180 | 354 167 |

Synonyms:

1. Behenic acid, methyl ester

2. Methyl behenate

3. Methyl docosanoate

4. n-Docosanoic acid methyl ester

5. Kemester 9022

Estimated non-polar retention index (n-alkane scale):

Value: 2475 iu

Confidence interval (Esters): 47(50%) 201(95%) iu

Retention index.

1. Value: 2531 iu

Column Type: Capillary

Column Class: Standard non-polar

Active Phase: CP Sil 5 CB

Column

Length: 50 m

Carrier Gas: H<sub>2</sub>

Column Diameter: 0.25 mm

Phase Thickness: 0.15 µm

Data Type: Linear

RI

Program Type: Ramp

Start T: 40 C

End T: 300 C

Heat Rate: 4 K/min

Start Time: 3 min

Source: Heinrich,

G.; Pfeifhofer, H.W.; Stabentheiner, E.; Sawidis, T., Glandular hairs of *Sigesbeckia jorullensis* Kunth (Asteraceae): morphology, histochemistry and composition of essential oil, Ann. Bot. Rome, 89, 2002, 459-469.

2. Value: 2502

iu

Column Type: Capillary

Column Class: Standard non-polar

Active Phase: DB-1

Column Length: 30

m

Column Diameter: 0.2 mm

Phase Thickness: 0.25 µm

Data Type: Linear RI

Program Type: Ramp

Start T: 50

C

End T: 300 C

Heat Rate: 5 K/min

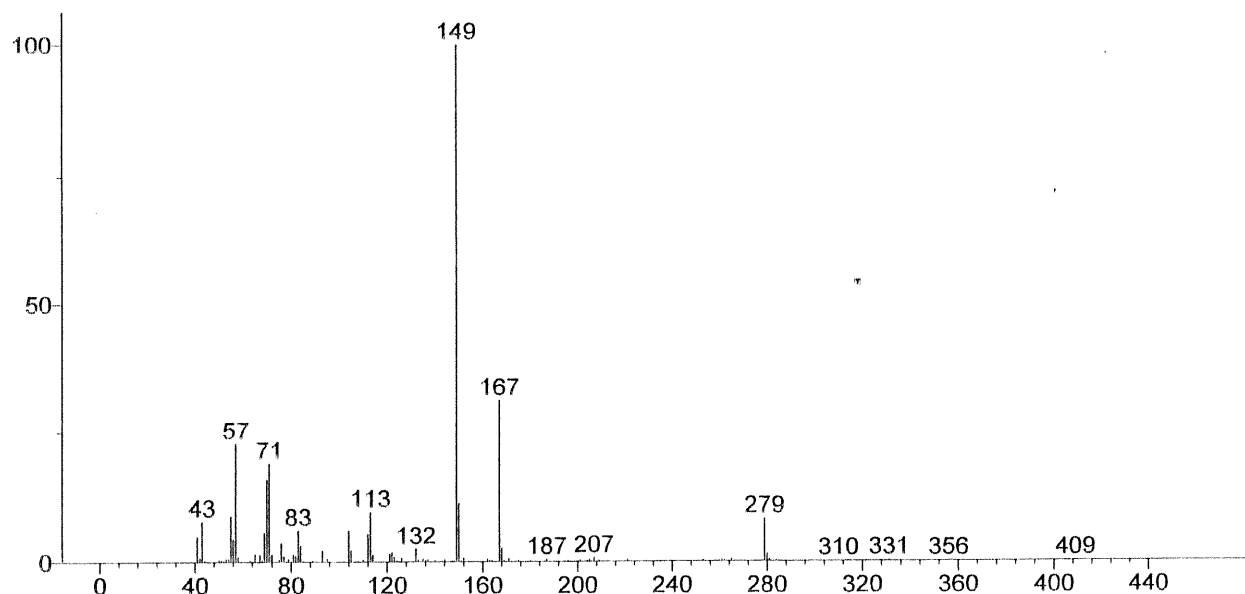

(Text File) +EI Scan (76.668 min) ALI-OLE-H7-220421-.D Subtract

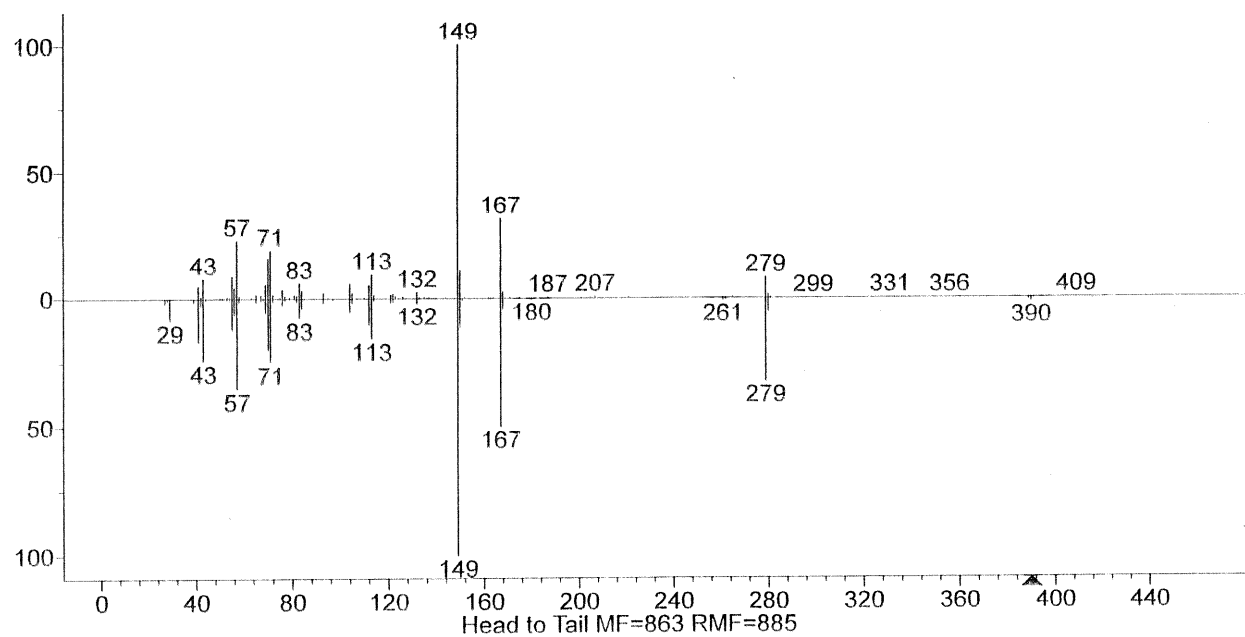

Head to Tail MF=863 RMF=885

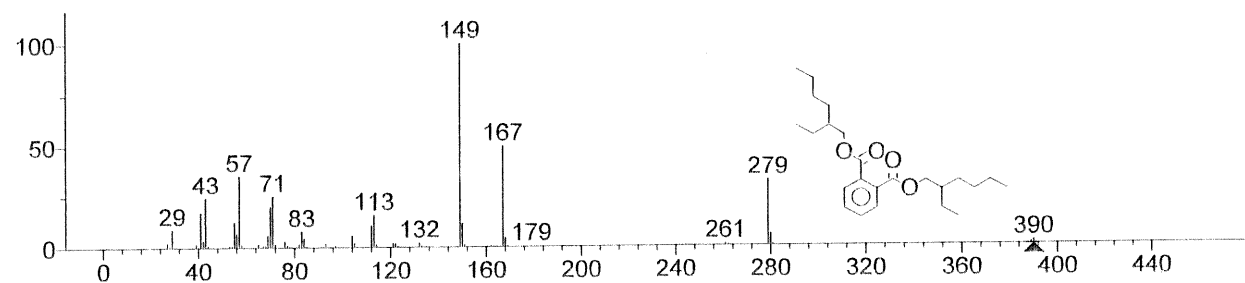

(mainlib) Bis(2-ethylhexyl) phthalate

Name: Bis(2-ethylhexyl) phthalate

Formula: C<sub>24</sub>H<sub>38</sub>O<sub>4</sub>

MW: 390 CAS#: 117-81-7 NIST#: 229113 ID#: 110646 DB: mainlib

Other DBs: Fine, TSCA, RTECS, EPA, HODOC, NIH, EINECS, IRDB

Contributor: Japan AIST/NIMC Database- Spectrum MS-NW-8633

10 largest peaks:

149 999 | 167 497 | 57 351 | 279 322 | 71 249 | 43 242 | 70 200 | 41 170 | 113 156 | 55 125 |

Synonyms:

1.1,2-Benzenedicarboxylic acid, bis(2-ethylhexyl) ester

2.Phthalic acid, bis(2-ethylhexyl) ester

3.Bis(2-ethylhexyl) 1,2-benzenedicarboxylate

4.Bisoflex 81

5.Compound 889

6.Di(ethylhexyl) phthalate

7.Di(2-ethylhexyl) phthalate

8.Dioctyl phthalate

9.DEHP

10.DOP

11.Ethylhexyl Phthalate

12.Eviplast 80

13.Eviplast 81

14.Fleximel

15.Flexol DOP

16.Kodaflex DOP

17.Octoil

18.Octyl phthalate

19.Palatinol AH

20.Pittsburgh PX-138

21.Sicol 150

22.Staflex DOP

23.Truflex DOP

24.Vestinol AH

25.Vinicizer 80

26.Witcizer 312

27.1,2-Benzenedicarboxylic acid, bis(ethylhexyl) ester

28.2-Ethylhexyl phthalate

29.Dioctyl-o-benzenedicarboxylate

30.Phthalic acid di(2-ethylhexyl) ester

31.di-iso-Octyl phthalate

32.Bis(ethylhexyl) phthalate

33.Bisoflex DOP

34.Celluflex DOP

35.Di(2-ethylhexyl) o-phthalate

36.Di-sec-octyl phthalate

37.Flexol plasticizer DOP

38.Hercoflex 260

39.NCI-C52733

40.Polycizer 162

41.PX-138

42.RC plasticizer DOP

43.Behp

44.Bis-(2-ethylhexyl)ester kyseliny ftalove

45.DAF 68

46.Di(2-ethylhexyl)orthophthalate



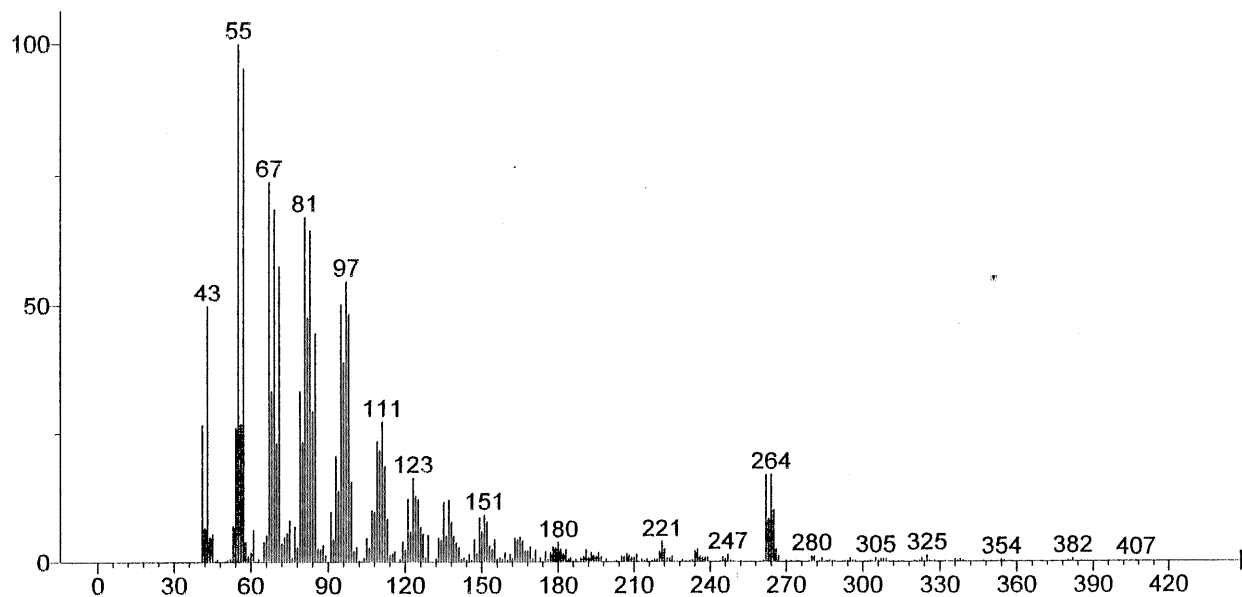

(Text File) +EI Scan (78.821 min) ALI-OLE-H7-220421-D Subtract

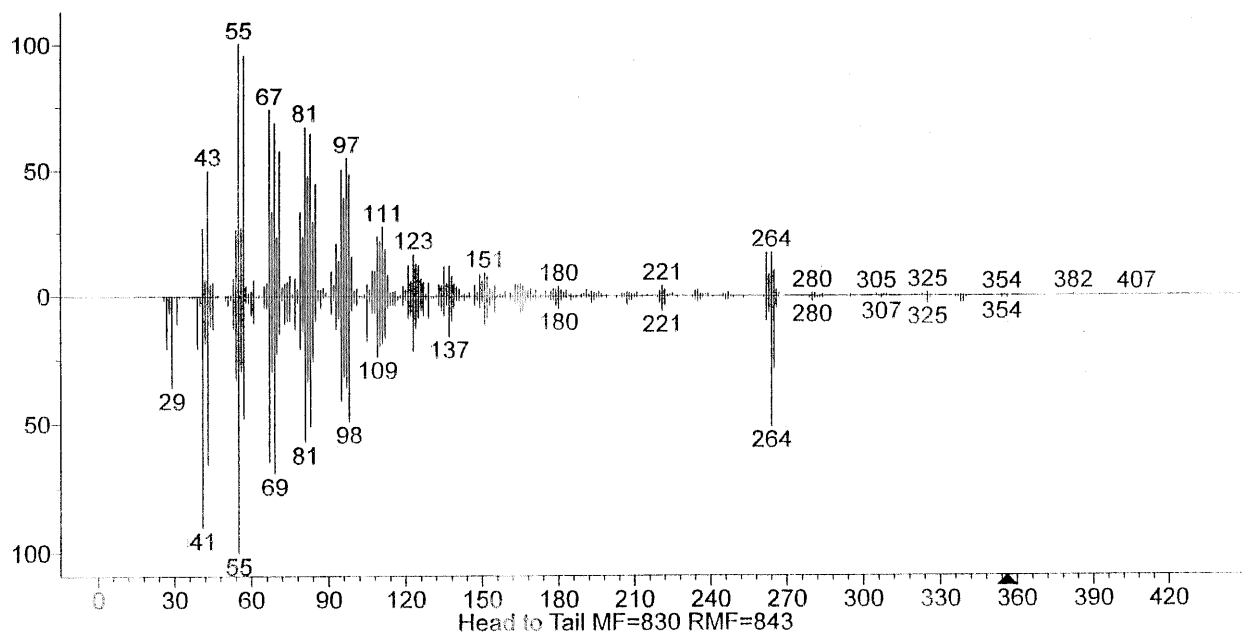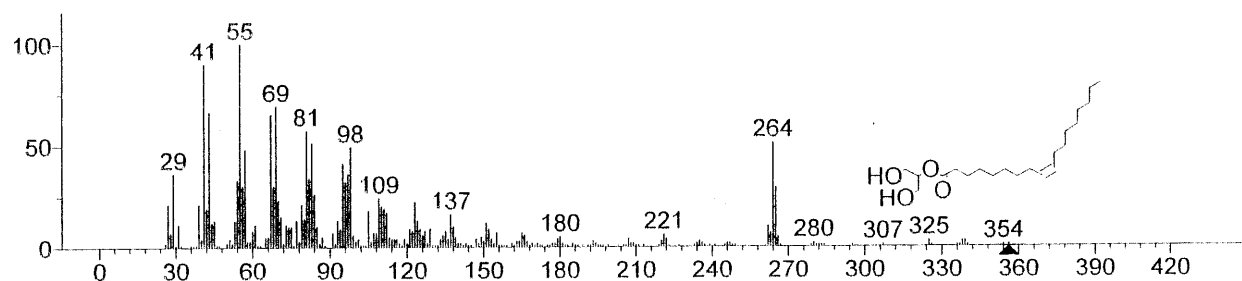

(mainlib) 9-Octadecenoic acid (Z)-, 2-hydroxy-1-(hydroxymethyl)ethyl ester

Name: 9-Octadecenoic acid (Z)-, 2-hydroxy-1-(hydroxymethyl)ethyl ester

Formula:  $C_{21}H_{40}O_4$

MW: 356 CAS#: 3443-84-3 NIST#: 16061 ID#: 17482 DB: mainlib

Other DBs: None

10 largest peaks:

55 999 | 41 900 | 69 690 | 43 660 | 67 650 | 81 570 | 83 510 | 264 510 | 98 490 | 57 480 |

Synonyms:

1.Olein, 2-mono-

2.β-Monoolein

3.Glycerol 2-monooleate

4.2-Monoolein

5.2-Monooleoylglycerol

6.2-Oleoyl glycerol ether

7.2-Oleoylglycerol

8.2-Hydroxy-1-(hydroxymethyl)ethyl (9Z)-9-octadecenoate #

Estimated non-polar retention index (n-alkane scale):

Value: 2705 iu

Confidence interval (Diverse functional groups): 89(50%) 382(95%) iu

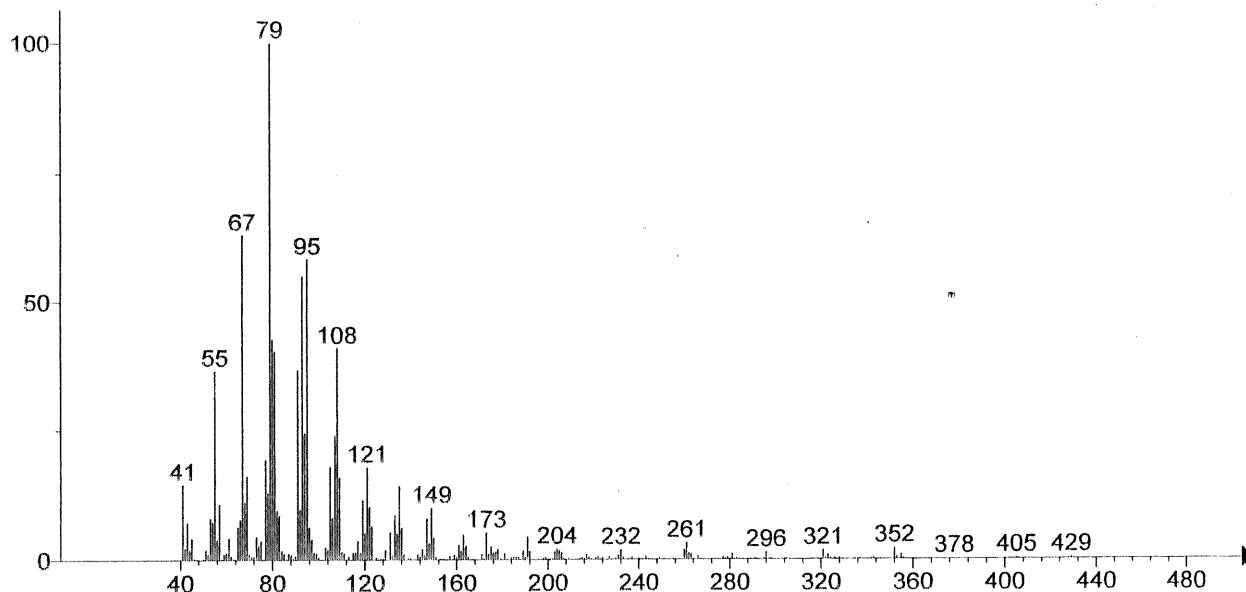

(Text File) +EI Scan (78.931 min) ALI-OLE-H7-220421-.D Subtract

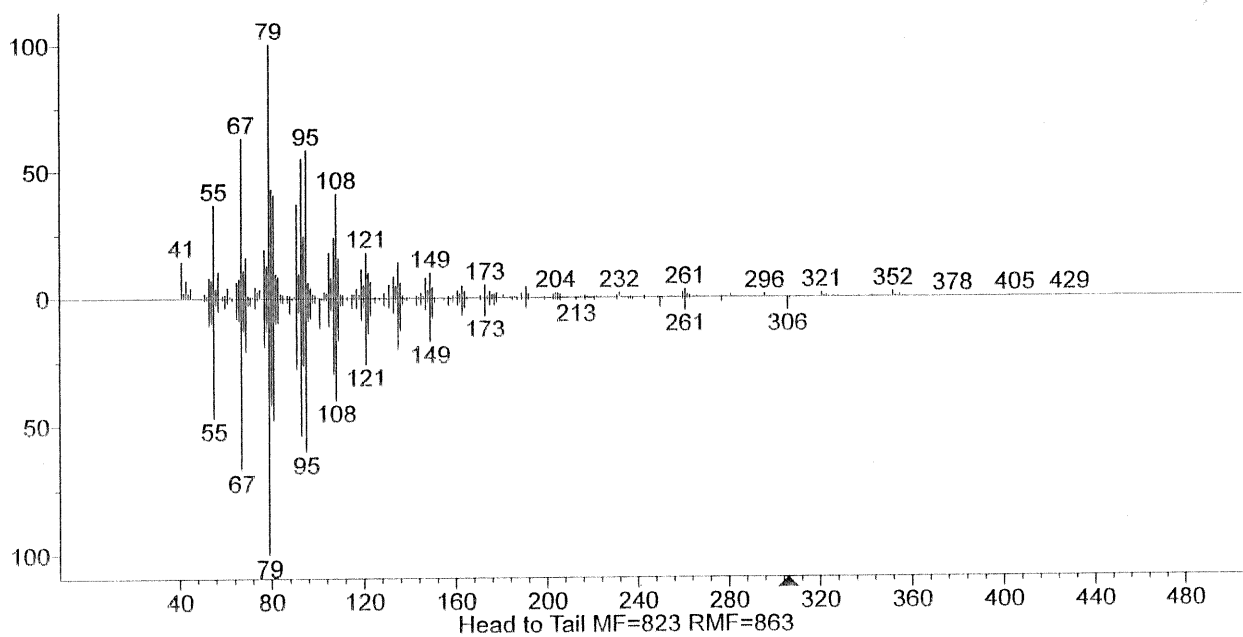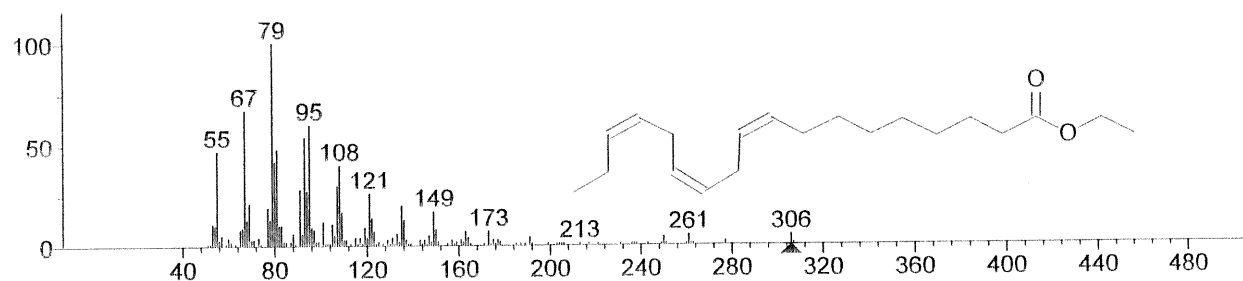

(mainlib) Ethyl 9,12,15-octadecatrienoate

Name: Ethyl 9,12,15-octadecatrienoate

Formula:  $C_{20}H_{34}O_2$

MW: 306 NIST#: 336774 ID#: 41709 DB: mainlib

Contributor: William W. Christie, Mylnefield Lipid Analysis, Invergowrie, Dundee, Scotland, UK

10 largest peaks:

79 999 | 67 669 | 95 599 | 93 539 | 81 479 | 55 469 | 80 419 | 108 399 | 107 299 | 91 279 |

Synonyms:

no synonyms.

Estimated non-polar retention index (n-alkane scale):

Value: 2201 iu

Confidence interval (Esters): 47(50%) 201(95%) iu

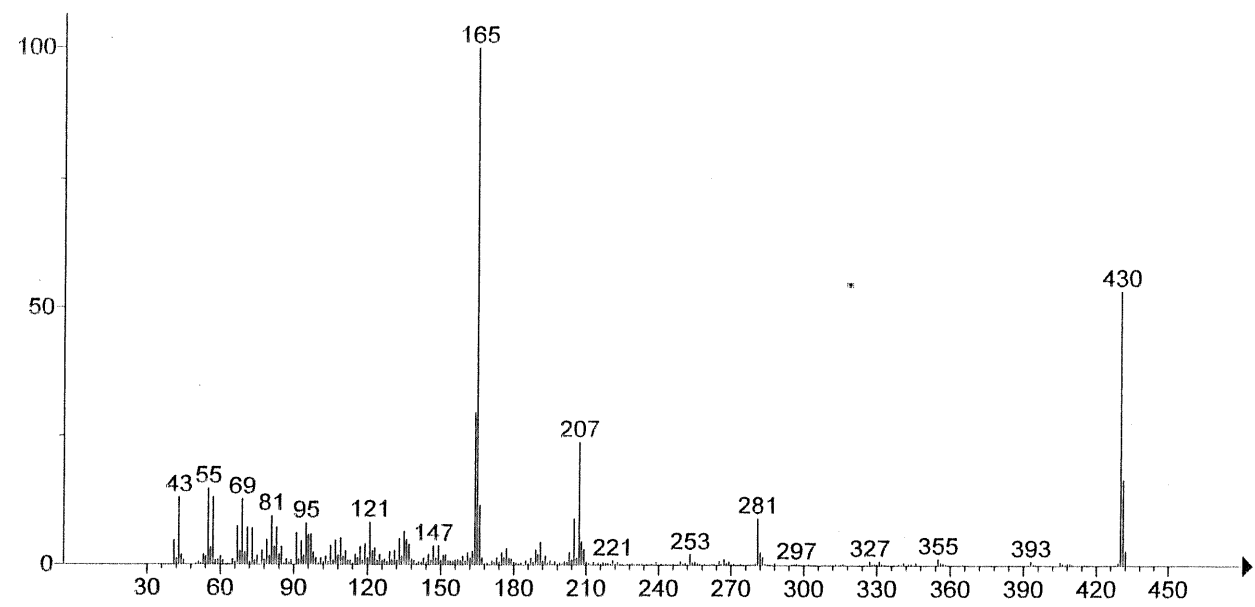

(Text File) +EI Scan (86.513 min) ALI-OLE-H7-220421-.D

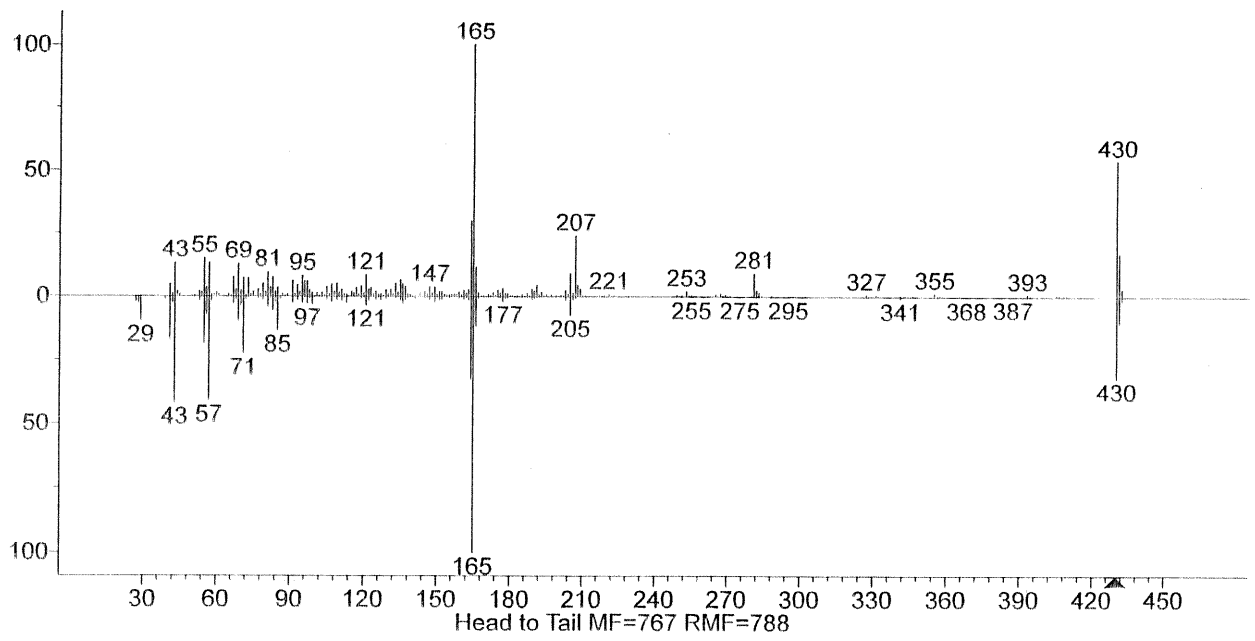

Head to Tail MF=767 RMF=788

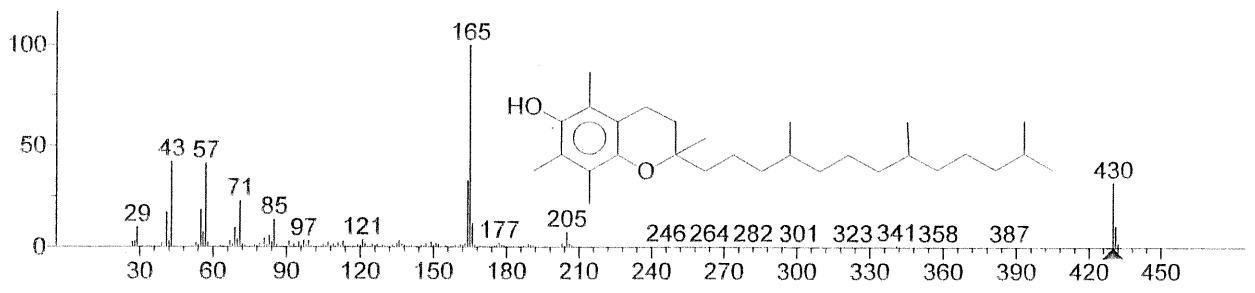

(mainlib) Vitamin E

Name: Vitamin E

Formula: C<sub>29</sub>H<sub>50</sub>O<sub>2</sub>

MW: 430 CAS#: 59-02-9 NIST#: 151382 ID#: 122577 DB: mainlib

Other DBs: TSCA, RTECS, HODOC, NIH, EINECS

Contributor: Chemical Concepts

10 largest peaks:

165 999 | 43 419 | 57 410 | 164 326 | 430 318 | 71 226 | 55 185 | 41 171 | 85 135 | 166 117 |

Synonyms:

1. 2H-1-Benzopyran-6-ol, 3,4-dihydro-2,5,7,8-tetramethyl-2-(4,8,12-trimethyltridecyl)-, [2R-[2R\*(4R\*,8R\*)]]-

2. α-Tocopherol

3. α-Tokoferol

4. (All-R)-α-Tocopherol

5. (2R,4'R,8'R)-α-Tocopherol

6. D-α-tocopherol

7. Almefrol

8. Antisterility vitamin

9. Denamone

10. Emipherol

11. Endo E

12. Ephynal

13. Eprolin

14. Eprolin S

15. Epsilon

16. Esorb

17. Etamican

18. Etavit

19. Evion

20. Evitaminum

21. Ilitia

22. Phytogermine

23. Profecundin

24. Spavit E

25. Syntopherol

26. Tokopharm

27. Vascuals

28. Verrol

29. Vi-E

30. Vitaplex E

31. Vitayonon

32. Viteolin

33. 5,7,8-Trimethyltolcol

34. component of E and C-Level

35. component of Estopherol

36. Aquasol E

37. Lan-E

38. Med-E

39. Vita E

40. Covi-ox

41. Spavit

42. (R,R,R)-α-Tocopherol

43. (+)-α-Tocopherol

44. (+)-α-Tocopherol-α-tocopherolantisterility vitamin

45. [2R-2R\*(4R\*,8R\*)]-3,4-Dihydro-2,5,7,8-tetramethyl-2-(4,8,12-trimethyltridecyl)-2H-1-benzopyran-6-ol

46. 2,5,7,8-Tetramethyl-2-(4',8',12'-trimethyltridecyl)-6-chroman-ol

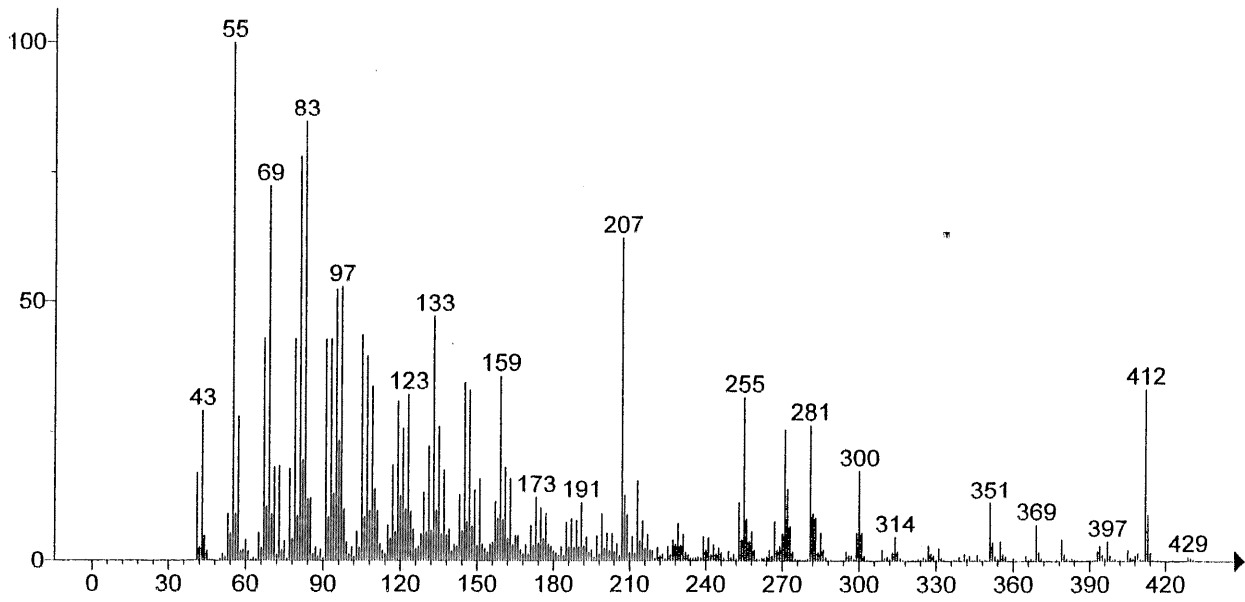

(Text File) +EI Scan (90.369 min) ALI-OLE-H7-220421-D

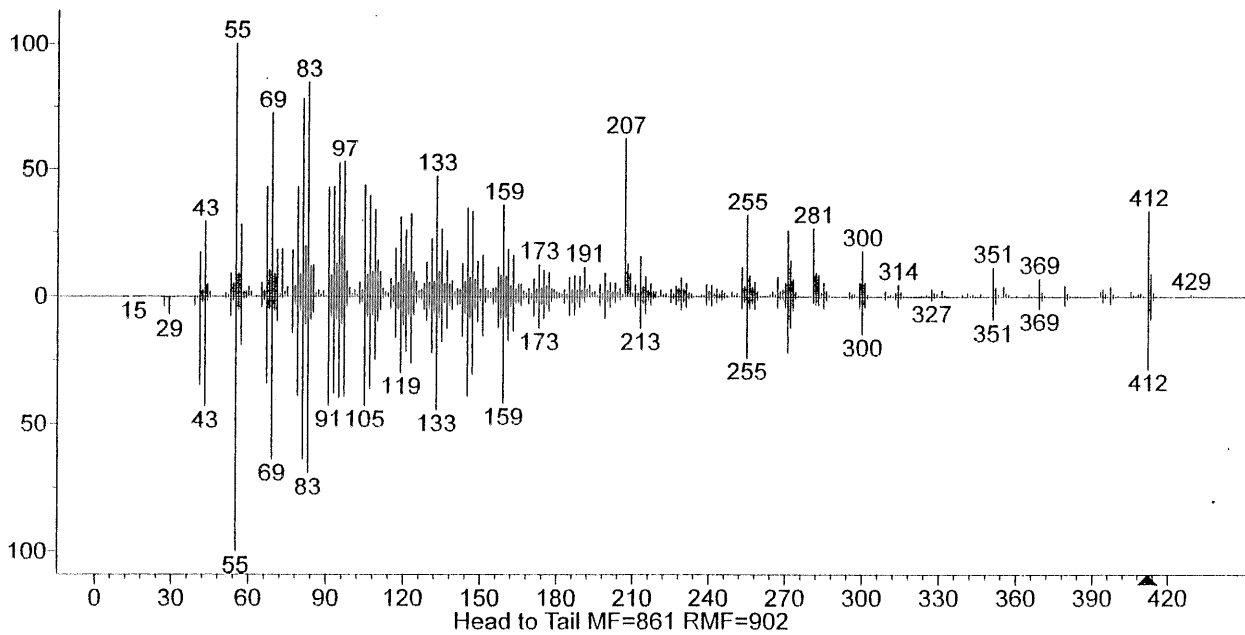

Head to Tail MF=861 RMF=902

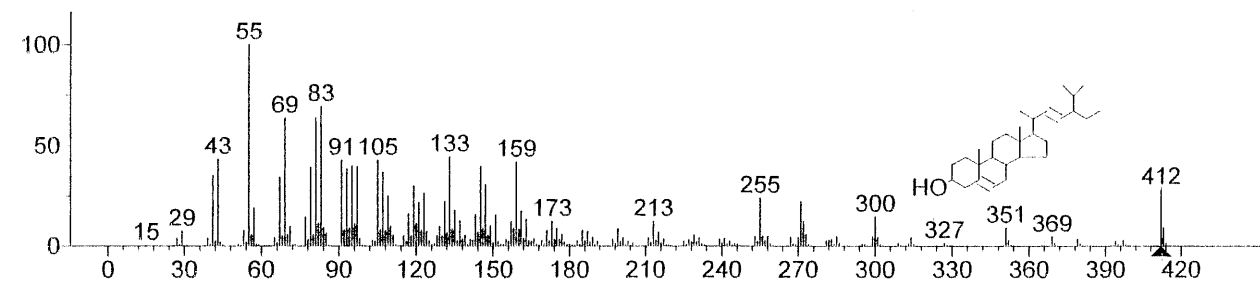

(mainlib) Stigmasterol

Name: Stigmasterol  
Formula: C<sub>29</sub>H<sub>48</sub>O  
MW: 412 CAS#: 83-48-7 NIST#: 352610 ID#: 18876 DB: mainlib  
Other DBs: Fine, HODOC, NIH, EINECS  
Contributor: NIST Mass Spectrometry Data Center

10 largest peaks:  
55 999 | 83 692 | 81 638 | 69 636 | 133 444 | 43 431 | 91 427 | 105 427 | 159 418 | 95 398 |

- Synonyms:
- 1. Stigmasta-5,22-dien-3-ol, (3 $\beta$ ,22E)-
  - 2. Stigmasta-5,22-dien-3 $\beta$ -ol
  - 3.  $\beta$ -Stigmasterol
  - 4. (24S)-5,22-Stigmastadien-3 $\beta$ -ol
  - 5. Stigmasta-5,22-dien-3-ol, (3 $\beta$ )-
  - 6. Stigmasterin
  - 7. Phytosterol
  - 8. 5,22-Cholestadien-24-ethyl-3 $\beta$ -ol
  - 9. DELTA.5,22-Stigmastadien-3 $\beta$ -ol
  - 10. I-Stigmasterol
  - 11. Stigmasta-5,22-dien-3-ol
  - 12. (22E)-Stigmasta-5,22-dien-3-ol #

Estimated non-polar retention index (n-alkane scale):  
Value: 2739 iu  
Confidence interval (Low reliability): 174(50%) 752(95%) iu

Retention index.

1. Value: 3221.93 iu  
Column Type: Capillary  
Column Class: Standard non-polar  
Active Phase: DB-1  
Column  
Length: 30 m  
Carrier Gas: H2  
Column Diameter: 0.25 mm  
Phase Thickness: 0.25  $\mu$ m  
Data Type: Kovats  
RI  
Program Type: Isothermal  
Start T: 270 C  
Source: Stránský, K.; Valterová, I.; Fiedler, P., Nonsaponifiable lipid components of the pollen of elder (*Sambucus nigra* L.), J. Chromatogr. A, 936, 2001, 173-181.

2. Value: 3222.15  
iu  
Column Type: Capillary  
Column Class: Standard non-polar  
Active Phase: DB-1  
Column Length: 30  
m  
Carrier Gas: H2  
Column Diameter: 0.25 mm  
Phase Thickness: 0.25  $\mu$ m  
Data Type: Kovats RI  
Program



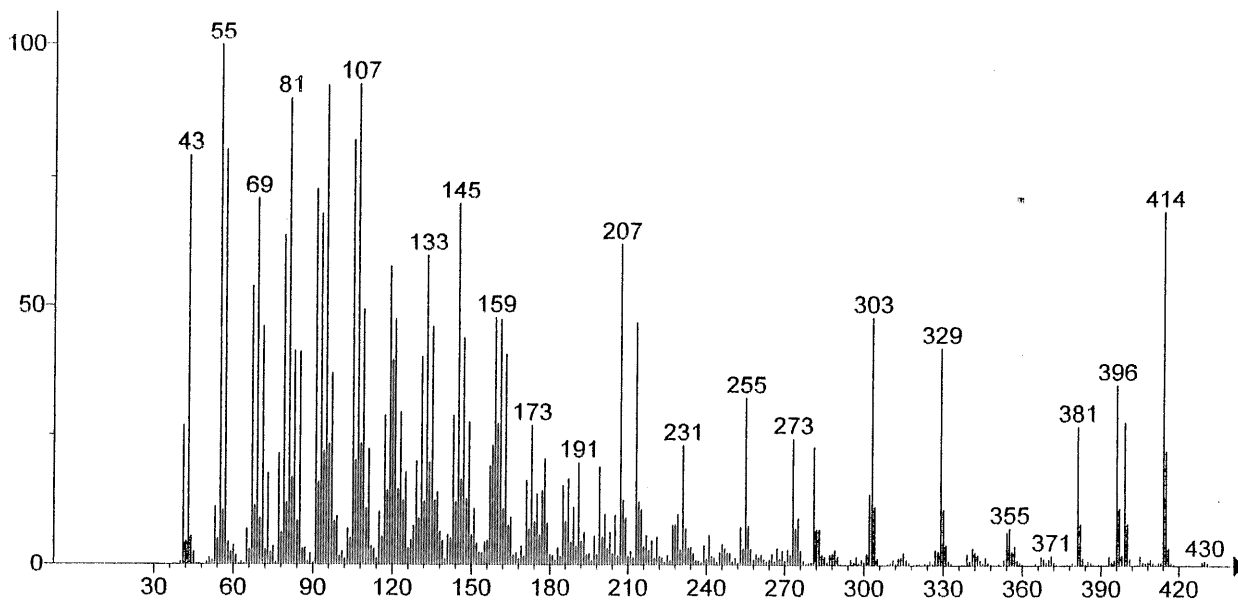

(Text File) +EI Scan (92.251 min) ALI-OLE-H7-220421-.D

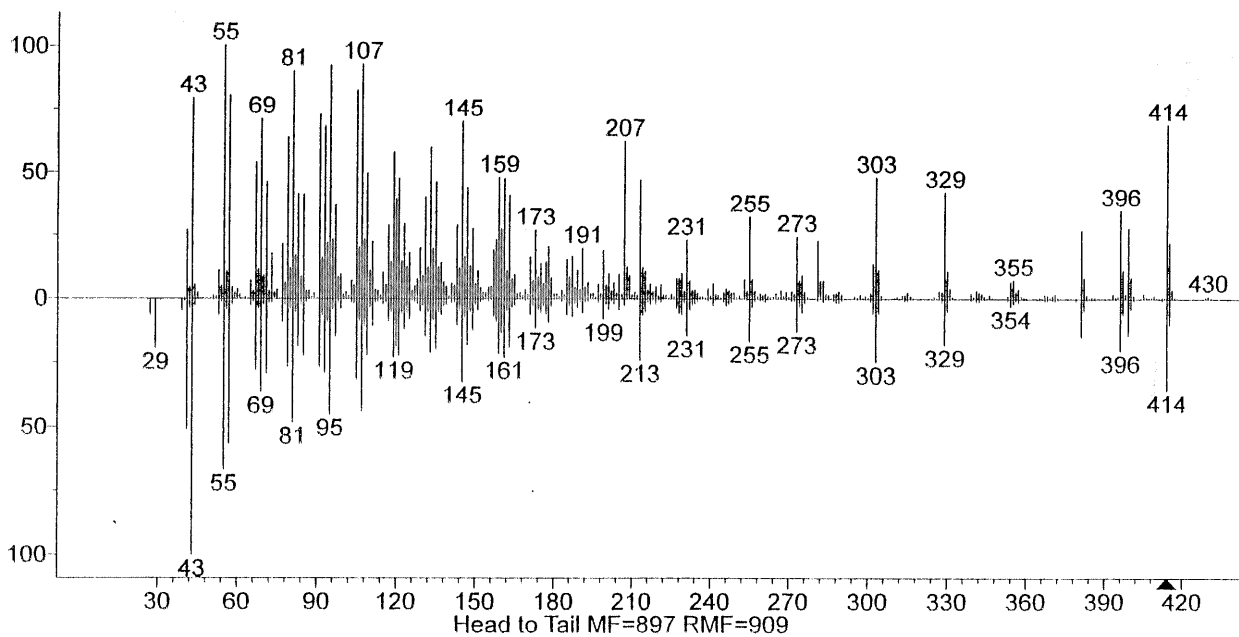

Head to Tail MF=897 RMF=909

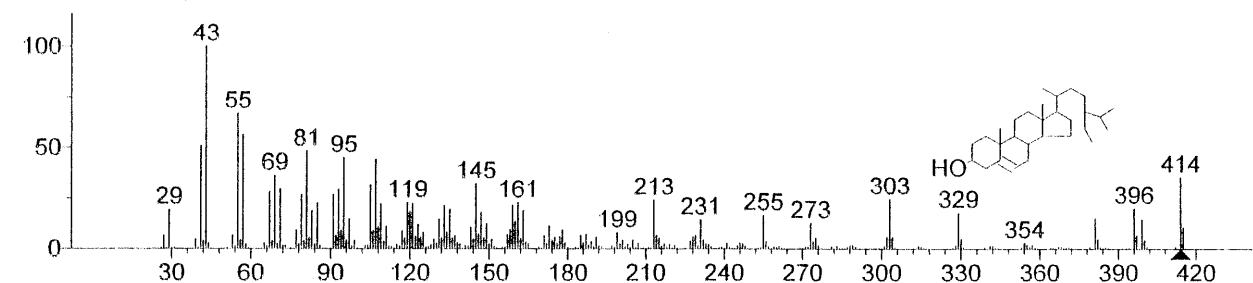

(mainlib)  $\gamma$ -Sitosterol

Name:  $\gamma$ -Sitosterol

Formula:  $C_{29}H_{50}O$

MW: 414 CAS#: 83-47-6 NIST#: 151558 ID#: 6743 DB: mainlib

Other DBs: HODOC, EINECS

Contributor: Chemical Concepts

10 largest peaks:

43 999 | 55 667 | 57 563 | 41 507 | 81 481 | 95 449 | 107 440 | 69 362 | 414 354 | 145 321 |

Synonyms:

1. Stigmast-5-en-3-ol, (3 $\beta$ ,24S)-

2. Stigmast-5-en-3 $\beta$ -ol, (24S)-

3. Clionasterol

4. Fucosterol,  $\beta$ -dihydro-

5. 24 $\beta$ -Ethyl-5-cholesten-3 $\beta$ -ol

6.  $\beta$ -Dihydrofucosterol

7. 22,23-Dihydroporiferasterol

8. 24S-Ethylcholest-5-en-3 $\beta$ -ol

9. 24 $\beta$ -Ethylcholesterol

10. Stigmast-5-en-3-ol #

Estimated non-polar retention index (n-alkane scale):

Value: 2731 iu

Confidence interval (Low reliability): 174(50%) 752(95%) iu

Retention index.

1. Value: 3066 iu

Column Type: Capillary

Column Class: Semi-standard non-polar

Active Phase: HP-5

Column

Length: 30 m

Carrier Gas: He

Column Diameter: 0.25 mm

Phase Thickness: 0.25  $\mu$ m

Data Type: Normal

alkane RI

Program Type: Complex

Description: 60C(5min)  $\Rightarrow$  3C/min  $\Rightarrow$  120C (2min)  $\Rightarrow$  2C/min  $\Rightarrow$  200C (2min)

$\Rightarrow$  3C/min  $\Rightarrow$  320C

Source: Yasar, A.; Üçüncü, O.; Güleç, C.; Inceer, H.; Ayaz, S.; Yayh, N., GC-MS analysis of chloroform extracts in flowers, stems, and roots of *Tripleurospermum callosum*, Pharm. Biol., 43(2), 2005, 108-112.
